# Supplementary material
Source: Frontiers journal article supplement (https://www.frontiersin.org/articles/234230)
Supplement: Data_Sheet_5.xls [file Data_Sheet_5.xls]

## Sheet: Supplement 5-W-vs-B.GeneDiffExp
GeneID	log2Ratio(B/W)	Probability	KEGG Orthology	GO Component	GO Function	GO Process	Blast nr
GSVIVT01000007001	1.77593	0.853949	K01206|1|7e-82|302|ath:AT1G67830|alpha-L-fucosidase [EC:3.2.1.51];K00514|3|6e-23|107|rcu:RCOM_1428040|zeta-carotene desaturase [EC:1.3.5.6]	-	GO:0016787//hydrolase activity	GO:0044238//primary metabolic process	gi|225451036|ref|XP_002284922.1|/0/PREDICTED: GDSL esterase/lipase At1g54790 [Vitis vinifera]
GSVIVT01035532001	-2.3404	0.85205	K13417|1|2e-47|188|ath:AT2G13790|somatic embryogenesis receptor kinase 4 [EC:2.7.10.1 2.7.11.1];K04733|5|4e-47|187|smo:SELMODRAFT_159261|interleukin-1 receptor-associated kinase 4 [EC:2.7.11.1]	-	GO:0004674//protein serine/threonine kinase activity;GO:0000166//nucleotide binding	-	gi|296081766|emb|CBI20771.3|/0/unnamed protein product [Vitis vinifera]
GSVIVT01000919001	1.21195	0.863375	K03768|1|1e-111|401|vvi:100248997|peptidyl-prolyl cis-trans isomerase B (cyclophilin B) [EC:5.2.1.8]	GO:0043231//intracellular membrane-bounded organelle	GO:0016859//cis-trans isomerase activity	GO:0044267//cellular protein metabolic process	gi|359473789|ref|XP_002265030.2|/1.41228e-114/PREDICTED: peptidyl-prolyl cis-trans isomerase CYP20-2, chloroplastic-like [Vitis vinifera]
GSVIVT01005054001	1.60704	0.815475	K00423|1|3e-174|610|ath:AT1G55570|L-ascorbate oxidase [EC:1.10.3.3]	GO:0005618//cell wall	GO:0046914//transition metal ion binding;GO:0016682//oxidoreductase activity, acting on diphenols and related substances as donors, oxygen as acceptor	GO:0008152//metabolic process;GO:0009628//response to abiotic stimulus	gi|225468506|ref|XP_002270831.1|/0/PREDICTED: L-ascorbate oxidase homolog [Vitis vinifera]
GSVIVT01037864001	-1.07403	0.846083	K13416|1|6e-63|239|vvi:100253855|brassinosteroid insensitive 1-associated receptor kinase 1 [EC:2.7.10.1 2.7.11.1];K13418|3|1e-59|228|ath:AT1G71830|somatic embryogenesis receptor kinase 1 [EC:2.7.10.1 2.7.11.1]	GO:0031410//cytoplasmic vesicle	GO:0016772//transferase activity, transferring phosphorus-containing groups	GO:0006796//phosphate-containing compound metabolic process	gi|225428947|ref|XP_002263235.1|/6.35396e-107/PREDICTED: somatic embryogenesis receptor kinase 1 [Vitis vinifera]
GSVIVT01011428001	-1.8375	0.849405	-	GO:0030529//ribonucleoprotein complex	GO:0005198//structural molecule activity	GO:0010467//gene expression	gi|225452841|ref|XP_002278445.1|/0/PREDICTED: uncharacterized protein LOC100266209 [Vitis vinifera]
GSVIVT01002585001	-1.27128	0.859397	-	-	-	-	gi|359497305|ref|XP_003635480.1|/9.05108e-23/PREDICTED: uncharacterized protein LOC100853147 [Vitis vinifera]
GSVIVT01028091001	2.11316	0.894593	K09422|1|0.0|735|vvi:100260656|myb proto-oncogene protein, plant	GO:0043231//intracellular membrane-bounded organelle	GO:0003676//nucleic acid binding	GO:0044249//cellular biosynthetic process	gi|225437513|ref|XP_002269995.1|/0/PREDICTED: transcription factor MYB12 [Vitis vinifera]
GSVIVT01026502001	-4.39397	0.918554	K11717|1|4e-10|64.7|gmx:100799615|cysteine desulfurase / selenocysteine lyase [EC:2.8.1.7 4.4.1.16]	-	GO:0048037//cofactor binding;GO:0016740//transferase activity	-	gi|296088560|emb|CBI37551.3|/0/unnamed protein product [Vitis vinifera]
GSVIVT01015211001	1.9772	0.828066	K00281|1|0.0|1904|vvi:100266280|glycine dehydrogenase [EC:1.4.4.2]	GO:0043231//intracellular membrane-bounded organelle	GO:0016628//oxidoreductase activity, acting on the CH-CH group of donors, NAD or NADP as acceptor;GO:0048037//cofactor binding;GO:0016642	GO:0006546//glycine catabolic process	gi|297738674|emb|CBI27919.3|/0/unnamed protein product [Vitis vinifera]
GSVIVT01017752001	1.62073	0.80354	-	-	-	-	gi|225432296|ref|XP_002273224.1|/1.44212e-77/PREDICTED: uncharacterized protein LOC100249327 [Vitis vinifera]
GSVIVT01021613001	2.05756	0.805145	-	GO:0016020//membrane	-	GO:0010101	gi|359483669|ref|XP_002274947.2|/0/PREDICTED: uncharacterized protein LOC100253161 [Vitis vinifera]
GSVIVT01016213001	1.45201	0.849948	-	GO:0009536//plastid	-	GO:0048229//gametophyte development	gi|225448960|ref|XP_002269222.1|/6.30232e-95/PREDICTED: uncharacterized protein LOC100263280 [Vitis vinifera]
GSVIVT01008707001	1.13123	0.841991	K00423|1|4e-169|593|aly:ARALYDRAFT_892557|L-ascorbate oxidase [EC:1.10.3.3]	-	GO:0016682//oxidoreductase activity, acting on diphenols and related substances as donors, oxygen as acceptor;GO:0046914//transition metal ion binding	GO:0008152//metabolic process	gi|225459808|ref|XP_002285913.1|/0/PREDICTED: L-ascorbate oxidase homolog [Vitis vinifera]
GSVIVT01017214001	1.09775	0.829536	-	GO:0016020//membrane	-	GO:0000302//response to reactive oxygen species;GO:0010038//response to metal ion	gi|297743372|emb|CBI36239.3|/0/unnamed protein product [Vitis vinifera]
GSVIVT01027182001	2.81402	0.814006	K09422|1|2e-103|374|vvi:100232899|myb proto-oncogene protein, plant	GO:0043231//intracellular membrane-bounded organelle	GO:0003676//nucleic acid binding	-	gi|297745498|emb|CBI40578.3|/3.01309e-107/unnamed protein product [Vitis vinifera]
GSVIVT01030002001	1.80735	0.860211	-	GO:0043231//intracellular membrane-bounded organelle	-	GO:0009725//response to hormone stimulus	gi|225447643|ref|XP_002274772.1|/1.54321e-110/PREDICTED: vesicle-associated protein 4-2-like [Vitis vinifera]
GSVIVT01002735001	1.28158	0.845178	K11251|1|2e-35|147|vvi:100251194|histone H2A	GO:0000785//chromatin;GO:0031981//nuclear lumen	GO:0003676//nucleic acid binding	GO:0006950//response to stress;GO:0034728//nucleosome organization;GO:0051707//response to other organism;GO:0009292//genetic transfer	gi|225469123|ref|XP_002272843.1|/2.04259e-34/PREDICTED: probable histone H2A.3 [Vitis vinifera]
GSVIVT01030375001	1.4096	0.850807	-	-	-	GO:0000003//reproduction	gi|359485502|ref|XP_002267127.2|/2.72633e-141/PREDICTED: expansin-B3-like [Vitis vinifera]
GSVIVT01007604001	1.51845	0.863059	-	GO:0009536//plastid	-	-	gi|225456849|ref|XP_002276527.1|/1.29462e-163/PREDICTED: uncharacterized protein LOC100243259 [Vitis vinifera]
GSVIVT01026341001	-1.70549	0.891632	K01206|1|1e-21|102|ath:AT1G67830|alpha-L-fucosidase [EC:3.2.1.51];K00514|3|8e-18|90.1|rcu:RCOM_1428040|zeta-carotene desaturase [EC:1.3.5.6]	-	GO:0016787//hydrolase activity	GO:0044238//primary metabolic process	gi|296085157|emb|CBI28652.3|/0/unnamed protein product [Vitis vinifera]
GSVIVT01001292001	-1.25019	0.866359	K14638|1|1e-101|369|ppp:PHYPADRAFT_189464|solute carrier family 15 (peptide/histidine transporter), member 3/4	GO:0016020//membrane	-	GO:0006810//transport	gi|297741170|emb|CBI31901.3|/0/unnamed protein product [Vitis vinifera]
GSVIVT01019810001	4.09238	0.848524	K14494|1|6e-23|105|ath:AT3G03450|DELLA protein	-	-	GO:0006351//transcription, DNA-dependent	gi|297742564|emb|CBI34713.3|/8.22378e-76/unnamed protein product [Vitis vinifera]
GSVIVT01021979001	3.46766	0.83756	K13832|1|0.0|998|vvi:100243536|3-dehydroquinate dehydratase / shikimate dehydrogenase [EC:4.2.1.10 1.1.1.25]	GO:0044424//intracellular part	GO:0016616//oxidoreductase activity, acting on the CH-OH group of donors, NAD or NADP as acceptor;GO:0016836//hydro-lyase activity;GO:0000166//nucleotide binding	GO:0008652//cellular amino acid biosynthetic process	gi|298204991|emb|CBI34298.3|/0/unnamed protein product [Vitis vinifera]
GSVIVT01010184001	1.64316	0.878362	K09828|1|4e-166|583|vvi:100258158|delta24-sterol reductase [EC:1.3.1.72]	GO:0031224//intrinsic to membrane	GO:0016628//oxidoreductase activity, acting on the CH-CH group of donors, NAD or NADP as acceptor;GO:0050662//coenzyme binding;GO:0005515//protein binding	GO:0008152//metabolic process	gi|297738246|emb|CBI27447.3|/0/unnamed protein product [Vitis vinifera]
GSVIVT01016804001	1.58125	0.811406	-	-	-	GO:0051234//establishment of localization	gi|225442214|ref|XP_002277175.1|/8.26687e-88/PREDICTED: coatomer subunit zeta-2 [Vitis vinifera]
GSVIVT01003386001	-1.47737	0.832994	-	-	-	-	gi|297736671|emb|CBI25688.3|/3.90051e-28/unnamed protein product [Vitis vinifera]
GSVIVT01003140001	1.90022	0.818866	K00873|1|0.0|1050|vvi:100256253|pyruvate kinase [EC:2.7.1.40]	GO:0009536//plastid	GO:0031420;GO:0016301//kinase activity;GO:0032559	GO:0006796//phosphate-containing compound metabolic process;GO:0006007//glucose catabolic process	gi|225437180|ref|XP_002280899.1|/0/PREDICTED: pyruvate kinase isozyme A, chloroplastic [Vitis vinifera]
GSVIVT01003161001	1.00724	0.806885	-	GO:0009528//plastid inner membrane	GO:0042802//identical protein binding;GO:0005375//copper ion transmembrane transporter activity	GO:0017038//protein import;GO:0006826//iron ion transport;GO:0030003//cellular cation homeostasis	gi|225428902|ref|XP_002285372.1|/1.23477e-129/PREDICTED: protein TIC 21, chloroplastic [Vitis vinifera]
GSVIVT01016576001	5.54138	0.953615	K11254|1|2e-27|119|mtr:MTR_2g096100|histone H4	GO:0000785//chromatin;GO:0031090//organelle membrane;GO:0009536//plastid	GO:0003676//nucleic acid binding	GO:0034728//nucleosome organization	gi|296086257|emb|CBI31698.3|/1.87617e-45/unnamed protein product [Vitis vinifera]
GSVIVT01030865001	-2.17928	0.897215	-	GO:0044444//cytoplasmic part	GO:0005488//binding	GO:0009902//chloroplast relocation	gi|225453134|ref|XP_002271689.1|/9.12663e-83/PREDICTED: uncharacterized protein At1g66480 [Vitis vinifera]
GSVIVT01037766001	4.07632	0.845382	K10400|1|8e-85|314|bdi:100844828|kinesin family member 15	-	-	-	gi|297737527|emb|CBI26728.3|/0/unnamed protein product [Vitis vinifera]
GSVIVT01009081001	-3.43802	0.813509	-	GO:0009536//plastid	-	-	gi|302141997|emb|CBI19200.3|/1.34104e-74/unnamed protein product [Vitis vinifera]
GSVIVT01019413001	-1.33097	0.862132	-	-	-	-	gi|225426154|ref|XP_002278542.1|/1.78098e-40/PREDICTED: uncharacterized protein LOC100258716 [Vitis vinifera]
GSVIVT01026890001	1.11238	0.854492	K02888|1|2e-51|201|vvi:100255002|large subunit ribosomal protein L21	GO:0009526//plastid envelope;GO:0009532//plastid stroma;GO:0030529//ribonucleoprotein complex	GO:0003723//RNA binding;GO:0005198//structural molecule activity	GO:0006950//response to stress;GO:0010467//gene expression	gi|225454186|ref|XP_002272295.1|/2.94006e-50/PREDICTED: 50S ribosomal protein L21, chloroplastic [Vitis vinifera]
GSVIVT01036818001	-2.58272	0.832836	K01206|1|3e-19|94.7|ath:AT1G67830|alpha-L-fucosidase [EC:3.2.1.51];K00514|3|7e-16|83.6|rcu:RCOM_1428040|zeta-carotene desaturase [EC:1.3.5.6]	-	-	-	gi|225460470|ref|XP_002272970.1|/0/PREDICTED: GDSL esterase/lipase At4g16230 [Vitis vinifera]
GSVIVT01037728001	1.5274	0.858696	-	-	-	-	gi|359494079|ref|XP_002277391.2|/5.56456e-51/PREDICTED: LOW QUALITY PROTEIN: 65-kDa microtubule-associated protein 1-like [Vitis vinifera]
GSVIVT01027898001	2.93516	0.811293	-	-	-	-	gi|296083713|emb|CBI23702.3|/1.22898e-158/unnamed protein product [Vitis vinifera]
GSVIVT01018781001	1.71895	0.894005	K00475|1|2e-174|610|vvi:100233079|naringenin 3-dioxygenase [EC:1.14.11.9]	-	GO:0016706//oxidoreductase activity, acting on paired donors, with incorporation or reduction of molecular oxygen, 2-oxoglutarate as one donor, and incorporation of one atom each of oxygen into both donors;GO:0019842//vitamin binding;GO:0043169//cation binding;GO:0016701//oxidoreductase activity, acting on single donors with incorporation of molecular oxygen	GO:0009699//phenylpropanoid biosynthetic process	gi|147807405|emb|CAN61951.1|/2.64112e-173/hypothetical protein VITISV_003886 [Vitis vinifera]
GSVIVT01024946001	2.56874	0.912338	-	GO:0044464//cell part	-	-	gi|297746064|emb|CBI16120.3|/4.5755e-165/unnamed protein product [Vitis vinifera]
GSVIVT01000923001	-1.77273	0.81864	-	-	-	-	gi|296088707|emb|CBI38157.3|/2.85514e-61/unnamed protein product [Vitis vinifera]
GSVIVT01004836001	-1.91787	0.867761	-	-	-	GO:0010876//lipid localization	gi|359474412|ref|XP_003631458.1|/1.7603e-64/PREDICTED: uncharacterized protein LOC100853220 [Vitis vinifera]
GSVIVT01029948001	1.47457	0.820426	-	GO:0009536//plastid	GO:0004175//endopeptidase activity	GO:0009314//response to radiation;GO:0019684//photosynthesis, light reaction;GO:0009725//response to hormone stimulus;GO:0009668;GO:0043623//cellular protein complex assembly;GO:0019538//protein metabolic process;GO:0009630//gravitropism	gi|225439191|ref|XP_002269447.1|/0/PREDICTED: uncharacterized protein LOC100253507 [Vitis vinifera]
GSVIVT01010308001	-1.67056	0.839301	K13993|1|1e-68|258|pop:POPTR_769024|HSP20 family protein	-	-	GO:0050896//response to stimulus	gi|225425914|ref|XP_002272065.1|/9.27434e-124/PREDICTED: 25.3 kDa heat shock protein, chloroplastic [Vitis vinifera]
GSVIVT01032082001	2.36436	0.853791	K14297|1|2e-10|65.1|mtr:MTR_1g066430|nuclear pore complex protein Nup98-Nup96;K11982|2|2e-08|58.5|vvi:100262515|E3 ubiquitin-protein ligase RNF115/126 [EC:6.3.2.19];K15692|3|2e-08|58.2|ppp:PHYPADRAFT_16563|E3 ubiquitin-protein ligase RNF13 [EC:6.3.2.19]	-	GO:0046914//transition metal ion binding;GO:0019899//enzyme binding;GO:0019787//small conjugating protein ligase activity	GO:0045926//negative regulation of growth;GO:0016567//protein ubiquitination;GO:0003006//developmental process involved in reproduction	gi|359487286|ref|XP_002279794.2|/1.35209e-149/PREDICTED: E3 ubiquitin ligase BIG BROTHER [Vitis vinifera]
GSVIVT01025914001	3.60399	0.873932	K01206|1|6e-29|127|ath:AT1G67830|alpha-L-fucosidase [EC:3.2.1.51];K00514|3|7e-27|120|rcu:RCOM_1428040|zeta-carotene desaturase [EC:1.3.5.6]	GO:0031410//cytoplasmic vesicle	GO:0016787//hydrolase activity	GO:0044238//primary metabolic process	gi|359493337|ref|XP_002278219.2|/0/PREDICTED: GDSL esterase/lipase At1g71691-like [Vitis vinifera]
GSVIVT01030485001	2.0631	0.830259	K06995|1|5e-13|73.2|ppp:PHYPADRAFT_144325|	GO:0000229;GO:0043231//intracellular membrane-bounded organelle	-	-	gi|225447105|ref|XP_002271026.1|/1.03873e-80/PREDICTED: uncharacterized protein LOC100249947 [Vitis vinifera]
GSVIVT01018832001	-2.69989	0.858877	K09755|1|8e-173|605|vvi:100267863|ferulate-5-hydroxylase [EC:1.14.-.-]	-	GO:0046872//metal ion binding	-	gi|297735054|emb|CBI17416.3|/0/unnamed protein product [Vitis vinifera]
GSVIVT01027465001	1.12972	0.801528	-	GO:0044464//cell part	-	-	gi|296089030|emb|CBI38733.3|/0/unnamed protein product [Vitis vinifera]
GSVIVT01034787001	-2.46612	0.800285	K00826|1|5e-20|94.0|rcu:RCOM_1585330|branched-chain amino acid aminotransferase [EC:2.6.1.42]	-	GO:0004084//branched-chain-amino-acid transaminase activity	GO:0006520//cellular amino acid metabolic process	gi|359493217|ref|XP_003634545.1|/1.25646e-24/PREDICTED: putative invertase inhibitor-like [Vitis vinifera]
GSVIVT01007190001	1.82099	0.835775	K01183|1|3e-111|399|vvi:100232985|chitinase [EC:3.2.1.14]	-	GO:0004553//hydrolase activity, hydrolyzing O-glycosyl compounds;GO:0030247//polysaccharide binding	GO:0006026	gi|296080858|emb|CBI18788.3|/1.01109e-148/unnamed protein product [Vitis vinifera]
GSVIVT01023530001	1.3179	0.836701	-	GO:0009536//plastid	GO:0005515//protein binding	-	gi|225453038|ref|XP_002266453.1|/4.53543e-142/PREDICTED: uncharacterized protein LOC100243269 [Vitis vinifera]
GSVIVT01019809001	3.74436	0.844523	K14494|1|3e-23|107|gmx:547718|DELLA protein	-	-	GO:0006351//transcription, DNA-dependent	gi|297742563|emb|CBI34712.3|/0/unnamed protein product [Vitis vinifera]
GSVIVT01038643001	1.40084	0.868168	-	GO:0009532//plastid stroma;GO:0030529//ribonucleoprotein complex	GO:0003723//RNA binding	GO:0010467//gene expression	gi|359490749|ref|XP_003634154.1|/2.07367e-145/PREDICTED: 30S ribosomal protein 1, chloroplastic-like [Vitis vinifera]
GSVIVT01008962001	1.25288	0.828858	-	-	-	-	gi|302141898|emb|CBI19101.3|/1.41834e-82/unnamed protein product [Vitis vinifera]
GSVIVT01019774001	2.18902	0.895565	K07375|1|1e-14|76.3|mtr:MTR_7g089120|tubulin beta	-	-	-	gi|297742537|emb|CBI34686.3|/3.24311e-17/unnamed protein product [Vitis vinifera]
GSVIVT01015366001	1.78257	0.881256	-	-	-	-	gi|297738806|emb|CBI28051.3|/2.14102e-140/unnamed protein product [Vitis vinifera]
GSVIVT01025610001	4.70072	0.805529	K10398|1|0.0|1315|gmx:100796881|kinesin family member 11	GO:0015630//microtubule cytoskeleton	GO:0003774//motor activity;GO:0032559	GO:0007017//microtubule-based process	gi|225439866|ref|XP_002274736.1|/0/PREDICTED: 125 kDa kinesin-related protein [Vitis vinifera]
GSVIVT01012919001	-1.51008	0.859623	-	-	-	-	gi|225462636|ref|XP_002266003.1|/1.90346e-115/PREDICTED: GEM-like protein 4-like isoform 1 [Vitis vinifera]
GSVIVT01008238001	-1.37188	0.874633	K13081|1|8e-180|628|vvi:100233112|leucoanthocyanidin reductase [EC:1.17.1.3]	-	-	-	gi|225455852|ref|XP_002273915.1|/1.02239e-178/PREDICTED: leucoanthocyanidin reductase [Vitis vinifera]
GSVIVT01012865001	-1.39934	0.84059	-	-	-	-	gi|296084553|emb|CBI25574.3|/2.69471e-116/unnamed protein product [Vitis vinifera]
GSVIVT01005964001	1.98568	0.901736	-	-	-	-	gi|225448833|ref|XP_002282451.1|/5.93774e-35/PREDICTED: uncharacterized protein LOC100244913 [Vitis vinifera]
GSVIVT01026582001	4.99092	0.954406	K11253|1|4e-40|161|mtr:MTR_1g105310|histone H3	GO:0043231//intracellular membrane-bounded organelle	GO:0005488//binding	-	gi|296088610|emb|CBI37601.3|/6.26625e-56/unnamed protein product [Vitis vinifera]
GSVIVT01016164001	1.73347	0.887065	K11252|1|4e-30|128|mtr:MTR_087s0002|histone H2B	GO:0000785//chromatin;GO:0043231//intracellular membrane-bounded organelle	GO:0003676//nucleic acid binding	GO:0034728//nucleosome organization	gi|460409198|ref|XP_004250026.1|/4.68698e-29/PREDICTED: probable histone H2B.1-like [Solanum lycopersicum]
GSVIVT01030135001	-2.35484	0.918825	-	-	-	-	gi|225447462|ref|XP_002263769.1|/1.39176e-57/PREDICTED: uncharacterized protein LOC100252914 [Vitis vinifera]
GSVIVT01016856001	1.94136	0.877865	K15403|1|0.0|1111|vvi:100246317|fatty acid omega-hydroxy dehydrogenase [EC:1.1.-.-]	-	GO:0016491//oxidoreductase activity;GO:0016832//aldehyde-lyase activity;GO:0050662//coenzyme binding	GO:0019395//fatty acid oxidation;GO:0007154//cell communication;GO:0048229//gametophyte development	gi|297743084|emb|CBI35951.3|/0/unnamed protein product [Vitis vinifera]
GSVIVT01028856001	-4.15826	0.89335	K04079|1|0.0|920|vvi:100257736|molecular chaperone HtpG	GO:0044444//cytoplasmic part;GO:0016020//membrane;GO:0030312//external encapsulating structure	GO:0005488//binding	GO:0006952//defense response;GO:0010035//response to inorganic substance	gi|302143791|emb|CBI22652.3|/0/unnamed protein product [Vitis vinifera]
GSVIVT01031019001	1.82409	0.810909	-	GO:0043231//intracellular membrane-bounded organelle	-	-	gi|225452051|ref|XP_002280445.1|/0/PREDICTED: uncharacterized protein LOC100242848 [Vitis vinifera]
GSVIVT01015560001	-2.43178	0.84979	-	-	GO:0046914//transition metal ion binding	-	gi|297738974|emb|CBI28219.3|/2.55257e-65/unnamed protein product [Vitis vinifera]
GSVIVT01009972001	1.93344	0.894005	K00083|1|1e-116|417|vvi:100245522|cinnamyl-alcohol dehydrogenase [EC:1.1.1.195]	-	GO:0016616//oxidoreductase activity, acting on the CH-OH group of donors, NAD or NADP as acceptor;GO:0046914//transition metal ion binding	GO:0008152//metabolic process	gi|225457871|ref|XP_002269356.1|/0/PREDICTED: probable cinnamyl alcohol dehydrogenase 6 [Vitis vinifera]
GSVIVT01019593001	1.16821	0.862381	-	GO:0009534//chloroplast thylakoid;GO:0030529//ribonucleoprotein complex	GO:0003723//RNA binding;GO:0005198//structural molecule activity	GO:0010467//gene expression;GO:0022613//ribonucleoprotein complex biogenesis	gi|225426247|ref|XP_002264340.1|/2.54888e-78/PREDICTED: 30S ribosomal protein S6 alpha, chloroplastic [Vitis vinifera]
GSVIVT01030190001	1.24479	0.872101	-	-	GO:0005488//binding	GO:0051234//establishment of localization;GO:0010876//lipid localization	gi|297735549|emb|CBI18043.3|/4.8592e-76/unnamed protein product [Vitis vinifera]
GSVIVT01000416001	1.37161	0.84545	K08235|1|3e-167|586|vvi:100248328|xyloglucan:xyloglucosyl transferase [EC:2.4.1.207]	GO:0005576//extracellular region;GO:0030312//external encapsulating structure	GO:0016798//hydrolase activity, acting on glycosyl bonds;GO:0016758//transferase activity, transferring hexosyl groups	GO:0044042//glucan metabolic process	gi|225447415|ref|XP_002281574.1|/3.38255e-166/PREDICTED: xyloglucan endotransglucosylase/hydrolase protein 9 [Vitis vinifera]
GSVIVT01032948001	2.24879	0.822144	-	-	-	-	gi|225451673|ref|XP_002278174.1|/3.91131e-118/PREDICTED: uncharacterized protein LOC100261750 [Vitis vinifera]
GSVIVT01010614001	-1.25892	0.8353	-	-	-	-	gi|225455447|ref|XP_002279586.1|/8.73689e-167/PREDICTED: F-box protein PP2-A13 [Vitis vinifera]
GSVIVT01003118001	-2.1867	0.865478	-	-	GO:0003677//DNA binding	GO:0006351//transcription, DNA-dependent	gi|296084484|emb|CBI25043.3|/0/unnamed protein product [Vitis vinifera]
GSVIVT01006396001	1.58848	0.861567	K08695|1|0.0|638|vvi:100232981|anthocyanidin reductase [EC:1.3.1.77]	-	GO:0048037//cofactor binding	GO:0008152//metabolic process	gi|359496568|ref|XP_002271372.2|/0/PREDICTED: anthocyanidin reductase [Vitis vinifera]
GSVIVT01033376001	-1.12089	0.856051	K10610|1|3e-23|108|ota:Ot10g03450|DNA damage-binding protein 1;K03671|2|2e-08|58.9|pop:POPTR_219472|thioredoxin 1	GO:0009941//chloroplast envelope;GO:0009532//plastid stroma	GO:0015036//disulfide oxidoreductase activity	GO:0018904;GO:0019725//cellular homeostasis	gi|225441658|ref|XP_002282457.1|/6.04797e-157/PREDICTED: thioredoxin-like 1-1, chloroplastic-like [Vitis vinifera]
GSVIVT01014539001	-1.6747	0.865862	-	-	GO:0046872//metal ion binding	-	gi|302143166|emb|CBI20461.3|/4.24065e-68/unnamed protein product [Vitis vinifera]
GSVIVT01018352001	1.39322	0.877662	-	GO:0009532//plastid stroma	GO:0005515//protein binding	GO:0044267//cellular protein metabolic process	gi|225453275|ref|XP_002267346.1|/7.11068e-59/PREDICTED: 20 kDa chaperonin, chloroplastic [Vitis vinifera]
GSVIVT01022354001	-1.75274	0.846693	-	-	-	-	gi|296082607|emb|CBI21612.3|/1.46897e-156/unnamed protein product [Vitis vinifera]
GSVIVT01019563001	-1.08542	0.854853	-	-	-	-	gi|225426282|ref|XP_002266388.1|/2.22798e-115/PREDICTED: uncharacterized protein LOC100252953 [Vitis vinifera]
GSVIVT01028050001	1.39085	0.838985	K09286|1|2e-25|115|pop:POPTR_828432|EREBP-like factor	-	-	-	gi|297743922|emb|CBI36892.3|/1.23175e-128/unnamed protein product [Vitis vinifera]
GSVIVT01032807001	-2.01285	0.901646	K15172|1|4e-28|124|vcn:VOLCADRAFT_106802|transcription elongation factor SPT5	-	GO:0046872//metal ion binding	-	gi|297736598|emb|CBI25469.3|/0/unnamed protein product [Vitis vinifera]
GSVIVT01023921001	-1.93857	0.866992	-	-	GO:0003676//nucleic acid binding	GO:0009887//organ morphogenesis;GO:0008361//regulation of cell size;GO:0003006//developmental process involved in reproduction;GO:0009743//response to carbohydrate stimulus	gi|225428195|ref|XP_002281816.1|/8.66025e-152/PREDICTED: putative NAC domain-containing protein 94 [Vitis vinifera]
GSVIVT01023852001	-1.30993	0.869863	K00021|1|0.0|965|vvi:100245191|hydroxymethylglutaryl-CoA reductase (NADPH) [EC:1.1.1.34]	GO:0043231//intracellular membrane-bounded organelle;GO:0031224//intrinsic to membrane	GO:0016616//oxidoreductase activity, acting on the CH-OH group of donors, NAD or NADP as acceptor;GO:0048037//cofactor binding;GO:0000166//nucleotide binding	GO:0006720//isoprenoid metabolic process;GO:0006732//coenzyme metabolic process	gi|297744455|emb|CBI37717.3|/0/unnamed protein product [Vitis vinifera]
GSVIVT01007339001	1.01582	0.824043	K13422|1|4e-06|51.2|vvi:100250607|transcription factor MYC2	GO:0043231//intracellular membrane-bounded organelle	-	-	gi|297741862|emb|CBI33226.3|/1.12519e-123/unnamed protein product [Vitis vinifera]
GSVIVT01031761001	6.7656	0.879561	-	-	-	-	gi|297741297|emb|CBI32428.3|/1.61231e-102/unnamed protein product [Vitis vinifera]
GSVIVT01029967001	5.22291	0.855283	-	-	-	-	gi|296085907|emb|CBI31231.3|/0/unnamed protein product [Vitis vinifera]
GSVIVT01016504001	2.61406	0.875944	-	GO:0044464//cell part	-	GO:0009607//response to biotic stimulus	gi|225449436|ref|XP_002278079.1|/6.99967e-131/PREDICTED: thaumatin-like protein [Vitis vinifera]
GSVIVT01009371001	-1.64817	0.897079	-	-	GO:0070011//peptidase activity, acting on L-amino acid peptides	GO:0008152//metabolic process	gi|302142222|emb|CBI19425.3|/0/unnamed protein product [Vitis vinifera]
GSVIVT01014069001	1.32807	0.836362	K14442|1|1e-13|75.1|ota:Ot11g02100|ATP-dependent RNA helicase DHX36 [EC:3.6.4.13];K01859|2|4e-08|57.0|aly:ARALYDRAFT_485933|chalcone isomerase [EC:5.5.1.6]	GO:0009532//plastid stroma	GO:0016872//intramolecular lyase activity	GO:0009699//phenylpropanoid biosynthetic process;GO:0006575//cellular modified amino acid metabolic process	gi|359493644|ref|XP_002283758.2|/6.675e-148/PREDICTED: chalcone--flavonone isomerase-like [Vitis vinifera]
GSVIVT01009155001	1.04572	0.841471	-	GO:0005576//extracellular region;GO:0005618//cell wall	-	-	gi|359492937|ref|XP_002283889.2|/3.06865e-85/PREDICTED: aspartic proteinase nepenthesin-1-like [Vitis vinifera]
GSVIVT01011958001	2.60698	0.886026	K13081|1|0.0|687|vvi:100232982|leucoanthocyanidin reductase [EC:1.17.1.3]	-	GO:0005488//binding	-	gi|66570968|emb|CAI26309.1|/0/leucoanthocyanidin reductase 1 [Vitis vinifera]
GSVIVT01003614001	1.66647	0.812627	-	-	-	-	gi|297735940|emb|CBI18716.3|/7.41822e-105/unnamed protein product [Vitis vinifera]
GSVIVT01025542001	-1.04066	0.849315	-	GO:0009534//chloroplast thylakoid	-	-	gi|297741487|emb|CBI32619.3|/8.41343e-70/unnamed protein product [Vitis vinifera]
GSVIVT01008044001	3.25523	0.898323	-	-	-	-	gi|225456705|ref|XP_002273979.1|/0/PREDICTED: uncharacterized protein LOC100241687 [Vitis vinifera]
GSVIVT01024970001	3.1947	0.936299	-	-	-	-	gi|359478953|ref|XP_003632193.1|/2.94581e-06/PREDICTED: metallothionein-like protein type 2-like isoform 5 [Vitis vinifera]
GSVIVT01016403001	-2.14679	0.838985	K13993|1|5e-62|233|vvi:100261583|HSP20 family protein	-	-	-	gi|296086120|emb|CBI31561.3|/5.47718e-65/unnamed protein product [Vitis vinifera]
GSVIVT01020584001	-1.44783	0.873209	K09286|1|7e-20|95.9|aly:ARALYDRAFT_494572|EREBP-like factor	-	-	GO:0009987//cellular process	gi|225446428|ref|XP_002276215.1|/2.0886e-79/PREDICTED: ethylene-responsive transcription factor 4 [Vitis vinifera]
GSVIVT01031620001	1.04732	0.830056	K12462|1|1e-104|378|vvi:100260088|Rho GDP-dissociation inhibitor	-	-	-	gi|225433634|ref|XP_002263904.1|/1.42082e-103/PREDICTED: rho GDP-dissociation inhibitor 1 [Vitis vinifera]
GSVIVT01002001001	1.18594	0.86376	-	GO:0043231//intracellular membrane-bounded organelle	-	-	gi|225461044|ref|XP_002281441.1|/2.69727e-95/PREDICTED: protein LHCP TRANSLOCATION DEFECT [Vitis vinifera]
GSVIVT01037797001	5.26939	0.856119	K13289|1|1e-126|451|mtr:MTR_4g021500|cathepsin A (carboxypeptidase C) [EC:3.4.16.5];K09756|3|9e-117|419|ath:AT5G09640|serine carboxypeptidase-like 19 [EC:3.4.16.- 2.3.1.91]	-	GO:0004180//carboxypeptidase activity	-	gi|296083020|emb|CBI22424.3|/0/unnamed protein product [Vitis vinifera]
GSVIVT01036094001	1.9534	0.902957	-	-	-	-	gi|225464902|ref|XP_002274217.1|/1.13698e-89/PREDICTED: uncharacterized protein LOC100258720 [Vitis vinifera]
GSVIVT01015888001	5.17044	0.925517	-	-	-	-	gi|225464740|ref|XP_002264361.1|/5.11143e-61/PREDICTED: uncharacterized protein LOC100265579 [Vitis vinifera]
GSVIVT01017699001	-1.01007	0.841562	-	-	-	-	gi|297736822|emb|CBI26023.3|/3.38364e-132/unnamed protein product [Vitis vinifera]
GSVIVT01020928001	-1.15387	0.850151	K00696|1|0.0|1965|vvi:100262385|sucrose-phosphate synthase [EC:2.4.1.14]	-	GO:0035251//UDP-glucosyltransferase activity	GO:0005984//disaccharide metabolic process	gi|298205168|emb|CBI17227.3|/0/unnamed protein product [Vitis vinifera]
GSVIVT01038086001	2.95531	0.805642	-	GO:0043231//intracellular membrane-bounded organelle;GO:0016020//membrane;GO:0044463	-	GO:0042445//hormone metabolic process;GO:0009926//auxin polar transport	gi|296086776|emb|CBI32925.3|/4.26877e-162/unnamed protein product [Vitis vinifera]
GSVIVT01008333001	3.57086	0.861251	K11498|1|1e-77|290|ppp:PHYPADRAFT_115683|centromeric protein E	GO:0015630//microtubule cytoskeleton	GO:0003774//motor activity;GO:0032559	GO:0007349//cellularization;GO:0009987//cellular process;GO:0048229//gametophyte development	gi|297734244|emb|CBI15491.3|/0/unnamed protein product [Vitis vinifera]
GSVIVT01024338001	-1.05682	0.841607	-	-	-	-	gi|297737275|emb|CBI26476.3|/2.99833e-92/unnamed protein product [Vitis vinifera]
GSVIVT01011435001	-3.12304	0.918532	K13448|1|5e-13|72.4|ath:AT3G47480|calcium-binding protein CML	-	GO:0005488//binding	-	gi|225452853|ref|XP_002283723.1|/5.30503e-92/PREDICTED: probable calcium-binding protein CML45 [Vitis vinifera]
GSVIVT01031814001	-1.60482	0.886387	K06892|1|9e-101|365|ath:AT3G19010|;K05278|4|2e-42|171|pop:POPTR_665178|flavonol synthase [EC:1.14.11.23]	-	GO:0016491//oxidoreductase activity;GO:0046914//transition metal ion binding	GO:0008152//metabolic process	gi|359475228|ref|XP_003631618.1|/0/PREDICTED: gibberellin 20 oxidase 1-like [Vitis vinifera]
GSVIVT01000592001	1.23861	0.82506	K01728|1|0.0|765|vvi:100242302|pectate lyase [EC:4.2.2.2]	-	GO:0016837	-	gi|225424562|ref|XP_002285340.1|/0/PREDICTED: probable pectate lyase 5 [Vitis vinifera]
GSVIVT01009846001	2.71202	0.819183	-	-	GO:0005488//binding	-	gi|225458063|ref|XP_002280542.1|/2.29036e-74/PREDICTED: transcription factor VIP1-like [Vitis vinifera]
GSVIVT01015906001	1.108	0.84832	K00228|1|0.0|798|vvi:100243271|coproporphyrinogen III oxidase [EC:1.3.3.3]	GO:0009532//plastid stroma;GO:0005576//extracellular region	GO:0042802//identical protein binding;GO:0016634	GO:0006779//porphyrin-containing compound biosynthetic process	gi|225464720|ref|XP_002263190.1|/0/PREDICTED: coproporphyrinogen-III oxidase, chloroplastic-like [Vitis vinifera]
GSVIVT01008822001	-1.15905	0.846851	-	GO:0005618//cell wall;GO:0031410//cytoplasmic vesicle;GO:0031090//organelle membrane;GO:0043231//intracellular membrane-bounded organelle	-	-	gi|302141778|emb|CBI18981.3|/0/unnamed protein product [Vitis vinifera]
GSVIVT01013850001	1.32171	0.845269	K04564|1|5e-109|392|pop:POPTR_253123|superoxide dismutase, Fe-Mn family [EC:1.15.1.1]	-	GO:0003824//catalytic activity;GO:0016209//antioxidant activity;GO:0043169//cation binding	GO:0072593//reactive oxygen species metabolic process	gi|225454956|ref|XP_002280522.1|/5.04393e-153/PREDICTED: superoxide dismutase [Fe], chloroplastic [Vitis vinifera]
GSVIVT01031863001	-1.45572	0.803133	-	-	-	-	gi|297741380|emb|CBI32511.3|/9.13011e-23/unnamed protein product [Vitis vinifera]
GSVIVT01024997001	2.56201	0.885958	-	GO:0005618//cell wall	-	GO:0009607//response to biotic stimulus	gi|297746104|emb|CBI16160.3|/2.01685e-86/unnamed protein product [Vitis vinifera]
GSVIVT01034174001	1.46419	0.886704	-	-	GO:0043169//cation binding	-	gi|147817659|emb|CAN60160.1|/2.82407e-41/hypothetical protein VITISV_007130 [Vitis vinifera]
GSVIVT01001119001	2.89307	0.841516	K02540|1|0.0|1736|vvi:100266163|minichromosome maintenance protein 2	GO:0043231//intracellular membrane-bounded organelle	GO:0003676//nucleic acid binding;GO:0032559	GO:0006259//DNA metabolic process	gi|225425318|ref|XP_002273675.1|/0/PREDICTED: DNA replication licensing factor mcm2 [Vitis vinifera]
GSVIVT01035075001	-3.54601	0.849586	-	-	-	GO:0006950//response to stress	gi|225431834|ref|XP_002271360.1|/1.45733e-89/PREDICTED: major allergen Pru ar 1 [Vitis vinifera]
GSVIVT01009178001	3.51977	0.815272	K10395|1|0.0|2083|vvi:100247280|kinesin family member 4/7/21/27	-	GO:0003774//motor activity;GO:0000166//nucleotide binding	-	gi|302142065|emb|CBI19268.3|/0/unnamed protein product [Vitis vinifera]
GSVIVT01010000001	-3.07812	0.91071	-	-	-	-	gi|302142741|emb|CBI19944.3|/0/unnamed protein product [Vitis vinifera]
GSVIVT01030864001	-3.08754	0.922578	-	-	-	-	gi|296087172|emb|CBI33546.3|/1.01086e-81/unnamed protein product [Vitis vinifera]
GSVIVT01025190001	-1.97856	0.885822	-	-	-	-	gi|297746259|emb|CBI16315.3|/7.33742e-18/unnamed protein product [Vitis vinifera]
GSVIVT01032527001	1.29023	0.865704	-	GO:0009532//plastid stroma;GO:0009534//chloroplast thylakoid	GO:0043169//cation binding	GO:0006812//cation transport	gi|359488731|ref|XP_002275276.2|/1.04518e-74/PREDICTED: uncharacterized protein LOC100264617 [Vitis vinifera]
GSVIVT01013726001	5.79914	0.900402	K13366|1|0.0|967|vvi:100241347|polyamine oxidase (propane-1,3-diamine-forming) [EC:1.5.3.14]	GO:0031410//cytoplasmic vesicle	GO:0003824//catalytic activity	GO:0008152//metabolic process	gi|225425517|ref|XP_002267667.1|/0/PREDICTED: polyamine oxidase [Vitis vinifera]
GSVIVT01014547001	1.05494	0.847009	K06236|1|2e-21|101|pop:POPTR_584471|collagen, type I/II/III/V/XI, alpha	GO:0009536//plastid	-	-	gi|225461197|ref|XP_002283211.1|/7.41411e-110/PREDICTED: DAG protein, chloroplastic isoform 1 [Vitis vinifera]
GSVIVT01014585001	3.13658	0.825037	K10405|1|0.0|1460|vvi:100248639|kinesin family member C1	GO:0015630//microtubule cytoskeleton	GO:0003774//motor activity;GO:0032559	GO:0007017//microtubule-based process	gi|147768264|emb|CAN78128.1|/0/hypothetical protein VITISV_028758 [Vitis vinifera]
GSVIVT01008094001	-3.1164	0.841539	-	-	-	-	gi|297734058|emb|CBI15305.3|/2.34317e-103/unnamed protein product [Vitis vinifera]
GSVIVT01019913001	1.78586	0.823138	-	-	-	-	gi|297742645|emb|CBI34794.3|/7.40624e-123/unnamed protein product [Vitis vinifera]
GSVIVT01015882001	-1.6093	0.876125	K14709|1|2e-134|477|vvi:100255284|solute carrier family 39 (zinc transporter), member 1/2/3	GO:0016020//membrane	GO:0046873//metal ion transmembrane transporter activity;GO:0016491//oxidoreductase activity	GO:0006829//zinc ion transport	gi|225464748|ref|XP_002264621.1|/2.82808e-133/PREDICTED: zinc transporter 5 isoform 1 [Vitis vinifera]
GSVIVT01018003001	-1.09306	0.8261	K00676|1|8e-15|79.3|ppp:PHYPADRAFT_104139|ribosomal-protein-alanine N-acetyltransferase [EC:2.3.1.128]	-	GO:0016407//acetyltransferase activity	-	gi|225432712|ref|XP_002282836.1|/1.00187e-101/PREDICTED: uncharacterized N-acetyltransferase p20 [Vitis vinifera]
GSVIVT01027716001	-1.07134	0.823003	K10999|1|4e-78|262|sbi:SORBI_03g034680|cellulose synthase A [EC:2.4.1.12]	GO:0016020//membrane	GO:0016757//transferase activity, transferring glycosyl groups	GO:0009987//cellular process	gi|359477703|ref|XP_002280696.2|/0/PREDICTED: cellulose synthase-like protein G2-like [Vitis vinifera]
GSVIVT01034510001	2.35234	0.911592	K11253|1|2e-40|163|ota:Ot11g02340|histone H3	GO:0043231//intracellular membrane-bounded organelle	GO:0005488//binding	-	gi|296088610|emb|CBI37601.3|/5.9215e-44/unnamed protein product [Vitis vinifera]
GSVIVT01027069001	-3.10177	0.905488	K13426|1|4e-14|77.8|rcu:RCOM_1689100|WRKY transcription factor 29;K13425|3|5e-13|73.9|vvi:100256849|WRKY transcription factor 22	-	-	-	gi|297745413|emb|CBI40493.3|/0/unnamed protein product [Vitis vinifera]
GSVIVT01038134001	2.25202	0.860844	-	GO:0009532//plastid stroma	-	GO:0006810//transport;GO:0044267//cellular protein metabolic process	gi|296084277|emb|CBI24665.3|/8.26749e-114/unnamed protein product [Vitis vinifera]
GSVIVT01032039001	1.32757	0.875718	K11294|1|3e-16|84.7|smo:SELMODRAFT_15428|nucleolin;K13091|2|5e-10|63.9|ppp:PHYPADRAFT_198566|RNA-binding protein 39;K13201|3|5e-10|63.9|zma:100283683|nucleolysin TIA-1/TIAR;K13126|4|5e-10|63.9|pop:POPTR_287102|polyadenylate-binding protein;K13095|5|1e-09|62.8|sbi:SORBI_01g038690|splicing factor 1	GO:0009526//plastid envelope;GO:0009532//plastid stroma;GO:0009534//chloroplast thylakoid;GO:0030529//ribonucleoprotein complex	GO:0003723//RNA binding	-	gi|225450219|ref|XP_002265629.1|/1.0844e-112/PREDICTED: 30S ribosomal protein 2, chloroplastic [Vitis vinifera]
GSVIVT01009581001	2.04739	0.825783	K15015|1|1e-09|63.5|cre:CHLREDRAFT_196429|solute carrier family 32 (vesicular inhibitory amino acid transporter);K14209|3|2e-06|52.4|ppp:PHYPADRAFT_144039|solute carrier family 36 (proton-coupled amino acid transporter)	GO:0031224//intrinsic to membrane	GO:0005275//amine transmembrane transporter activity	-	gi|225458487|ref|XP_002284114.1|/0/PREDICTED: lysine histidine transporter-like 8 [Vitis vinifera]
GSVIVT01007216001	4.04032	0.82454	-	-	-	-	gi|297744925|emb|CBI38440.3|/0/unnamed protein product [Vitis vinifera]
GSVIVT01007183001	4.0696	0.943849	-	-	-	-	gi|225467749|ref|XP_002265070.1|/4.24668e-90/PREDICTED: uncharacterized protein LOC100267455 [Vitis vinifera]
GSVIVT01034066001	-1.02963	0.81638	-	-	-	-	gi|225440524|ref|XP_002275314.1|/1.59198e-76/PREDICTED: uncharacterized protein LOC100252790 isoform 1 [Vitis vinifera]
GSVIVT01033650001	2.09834	0.865161	-	GO:0009536//plastid	-	-	gi|225441197|ref|XP_002266366.1|/7.46426e-102/PREDICTED: uncharacterized protein LOC100255653 [Vitis vinifera]
GSVIVT01025913001	1.34361	0.813079	K01206|1|2e-18|91.7|aly:ARALYDRAFT_475890|alpha-L-fucosidase [EC:3.2.1.51];K00514|3|5e-17|87.4|rcu:RCOM_1428040|zeta-carotene desaturase [EC:1.3.5.6]	GO:0044464//cell part	GO:0016787//hydrolase activity	GO:0044238//primary metabolic process	gi|225460231|ref|XP_002278194.1|/0/PREDICTED: GDSL esterase/lipase At1g33811 [Vitis vinifera]
GSVIVT01006970001	-1.20183	0.843167	-	-	GO:0070011//peptidase activity, acting on L-amino acid peptides	GO:0008152//metabolic process	gi|297744929|emb|CBI38460.3|/0/unnamed protein product [Vitis vinifera]
GSVIVT01011007001	1.02289	0.812333	K01362|1|1e-17|90.5|osa:4339651|[EC:3.4.21.-];K14810|3|4e-15|82.0|ota:Ot01g04880|ATP-dependent RNA helicase DDX56/DBP9 [EC:3.6.4.13]	GO:0009532//plastid stroma;GO:0009534//chloroplast thylakoid	GO:0004175//endopeptidase activity;GO:0016628//oxidoreductase activity, acting on the CH-CH group of donors, NAD or NADP as acceptor	GO:0009765//photosynthesis, light harvesting;GO:0019538//protein metabolic process	gi|296086636|emb|CBI32271.3|/0/unnamed protein product [Vitis vinifera]
GSVIVT01001658001	-5.45672	0.932954	-	-	-	-	gi|296088100|emb|CBI35489.3|/7.20727e-84/unnamed protein product [Vitis vinifera]
GSVIVT01019682001	-1.76204	0.872485	-	-	-	-	gi|359474167|ref|XP_003631409.1|/1.12219e-36/PREDICTED: uncharacterized protein LOC100853997 [Vitis vinifera]
GSVIVT01025314001	5.36461	0.936322	-	-	-	-	gi|147862095|emb|CAN80883.1|/0/hypothetical protein VITISV_018652 [Vitis vinifera]
GSVIVT01016572001	-1.76796	0.888331	K13993|1|1e-64|243|vvi:100254799|HSP20 family protein	GO:0044439	GO:0005488//binding	GO:0006979//response to oxidative stress;GO:0044267//cellular protein metabolic process	gi|225449561|ref|XP_002283860.1|/1.37298e-63/PREDICTED: 15.7 kDa heat shock protein, peroxisomal [Vitis vinifera]
GSVIVT01028404001	1.99731	0.840522	K02866|1|2e-19|94.7|osa:4332737|large subunit ribosomal protein L10e	GO:0009536//plastid	GO:0016791//phosphatase activity	-	gi|225438005|ref|XP_002273448.1|/5.20192e-139/PREDICTED: acid phosphatase 1 [Vitis vinifera]
GSVIVT01000017001	1.51658	0.818324	K04733|1|1e-80|298|smo:SELMODRAFT_33807|interleukin-1 receptor-associated kinase 4 [EC:2.7.11.1];K13430|2|9e-80|295|zma:100283091|serine/threonine-protein kinase PBS1 [EC:2.7.11.1]	-	GO:0004672//protein kinase activity;GO:0032559	GO:0006464//cellular protein modification process	gi|225451019|ref|XP_002281041.1|/0/PREDICTED: receptor-like serine/threonine-protein kinase ALE2 [Vitis vinifera]
GSVIVT01024444001	3.73015	0.851711	K11294|1|5e-06|50.1|ppp:PHYPADRAFT_188347|nucleolin	-	-	-	gi|297737357|emb|CBI26558.3|/1.01006e-165/unnamed protein product [Vitis vinifera]
GSVIVT01015359001	1.79049	0.882228	K04392|1|2e-104|377|vvi:100266265|Ras-related C3 botulinum toxin substrate 1	GO:0016020//membrane	GO:0032561//guanyl ribonucleotide binding;GO:0004620//phospholipase activity	GO:0035556//intracellular signal transduction;GO:0006810//transport	gi|225445190|ref|XP_002284205.1|/2.36749e-103/PREDICTED: rac-like GTP-binding protein ARAC7 isoform 1 [Vitis vinifera]
GSVIVT01025630001	3.04235	0.85908	K10400|1|1e-10|66.2|rcu:RCOM_0773970|kinesin family member 15;K10696|2|3e-09|62.0|bdi:100828493|E3 ubiquitin-protein ligase BRE1 [EC:6.3.2.19];K09291|4|7e-07|53.9|mtr:MTR_2g063480|nucleoprotein TPR	-	-	-	gi|297741559|emb|CBI32691.3|/0/unnamed protein product [Vitis vinifera]
GSVIVT01018539001	2.45575	0.845789	K15397|1|6e-106|383|gmx:100816997|3-ketoacyl-CoA synthase [EC:2.3.1.-]	GO:0044464//cell part	GO:0016747//transferase activity, transferring acyl groups other than amino-acyl groups	GO:0006631//fatty acid metabolic process	gi|225455525|ref|XP_002267424.1|/0/PREDICTED: 3-ketoacyl-CoA synthase 5 [Vitis vinifera]
GSVIVT01000793001	5.47707	0.977938	-	-	-	-	gi|225446871|ref|XP_002283883.1|/1.30732e-29/PREDICTED: uncharacterized protein LOC100259123 [Vitis vinifera]
GSVIVT01026343001	2.90044	0.929337	K01206|1|2e-20|98.6|ath:AT1G67830|alpha-L-fucosidase [EC:3.2.1.51];K00514|3|4e-16|84.3|rcu:RCOM_1428040|zeta-carotene desaturase [EC:1.3.5.6]	-	GO:0016787//hydrolase activity	GO:0044238//primary metabolic process	gi|225430639|ref|XP_002268296.1|/0/PREDICTED: GDSL esterase/lipase At5g33370 [Vitis vinifera]
GSVIVT01000223001	3.79742	0.824585	K10436|1|4e-155|546|vvi:100262748|microtubule-associated protein, RP/EB family	GO:0044444//cytoplasmic part;GO:0030312//external encapsulating structure;GO:0031981//nuclear lumen;GO:0015630//microtubule cytoskeleton	GO:0015631//tubulin binding	GO:0009612//response to mechanical stimulus;GO:0007010//cytoskeleton organization	gi|296087397|emb|CBI33771.3|/1.01263e-157/unnamed protein product [Vitis vinifera]
GSVIVT01025362001	1.38377	0.826642	K11000|1|0.0|3798|vvi:100265625|callose synthase [EC:2.4.1.-]	GO:0043234//protein complex;GO:0044444//cytoplasmic part;GO:0016020//membrane	GO:0035251//UDP-glucosyltransferase activity	GO:0006074//(1->3)-beta-D-glucan metabolic process	gi|359478773|ref|XP_002283298.2|/0/PREDICTED: callose synthase 3-like [Vitis vinifera]
GSVIVT01025604001	3.86906	0.895474	-	-	-	-	gi|225439854|ref|XP_002278074.1|/2.29664e-28/PREDICTED: uncharacterized protein LOC100256772 [Vitis vinifera]
GSVIVT01025781001	4.44572	0.926737	K05868|1|0.0|747|vvi:100261859|cyclin B	GO:0043231//intracellular membrane-bounded organelle	-	GO:0007049//cell cycle	gi|225440137|ref|XP_002283152.1|/0/PREDICTED: G2/mitotic-specific cyclin S13-6 [Vitis vinifera]
GSVIVT01013467001	-2.75681	0.812831	K13448|1|8e-69|258|vvi:100247858|calcium-binding protein CML	-	-	-	gi|297745636|emb|CBI40801.3|/4.32383e-89/unnamed protein product [Vitis vinifera]
GSVIVT01015544001	-1.00137	0.807202	-	-	-	-	gi|225445519|ref|XP_002285231.1|/1.64897e-40/PREDICTED: uncharacterized protein LOC100255957 [Vitis vinifera]
GSVIVT01020411001	2.63363	0.866269	-	GO:0009536//plastid	-	-	gi|225462172|ref|XP_002267512.1|/1.07366e-121/PREDICTED: protein Iojap [Vitis vinifera]
GSVIVT01032710001	1.72239	0.899837	K01599|1|0.0|682|vvi:100257034|uroporphyrinogen decarboxylase [EC:4.1.1.37]	GO:0009526//plastid envelope;GO:0009532//plastid stroma	GO:0016831//carboxy-lyase activity	GO:0006779//porphyrin-containing compound biosynthetic process	gi|359486347|ref|XP_002274385.2|/0/PREDICTED: uroporphyrinogen decarboxylase, chloroplastic-like [Vitis vinifera]
GSVIVT01014999001	1.37605	0.868416	K01051|1|0.0|755|pop:POPTR_553829|pectinesterase [EC:3.1.1.11]	GO:0030312//external encapsulating structure	GO:0030234//enzyme regulator activity;GO:0004091//carboxylesterase activity	GO:0071555//cell wall organization;GO:0045229//external encapsulating structure organization	gi|8671350|emb|CAB95025.1|/0/pectin methylesterase [Nicotiana tabacum]
GSVIVT01028042001	2.61559	0.911095	K01179|1|2e-168|591|sbi:SORBI_02g030710|endoglucanase [EC:3.2.1.4]	GO:0044464//cell part	GO:0004553//hydrolase activity, hydrolyzing O-glycosyl compounds	GO:0044238//primary metabolic process	gi|225437426|ref|XP_002271736.1|/0/PREDICTED: endoglucanase 17 [Vitis vinifera]
GSVIVT01035972001	4.56723	0.957412	-	-	GO:0046914//transition metal ion binding	-	gi|225430494|ref|XP_002285538.1|/2.21114e-94/PREDICTED: early nodulin-like protein 1 [Vitis vinifera]
GSVIVT01021083001	1.05961	0.853542	K02988|1|2e-67|253|vvi:100264070|small subunit ribosomal protein S5	GO:0044424//intracellular part	-	-	gi|297740405|emb|CBI30587.3|/6.54463e-76/unnamed protein product [Vitis vinifera]
GSVIVT01030508001	-1.59862	0.896876	K05933|1|6e-171|598|vvi:100256784|aminocyclopropanecarboxylate oxidase [EC:1.14.17.4]	-	GO:0043169//cation binding;GO:0019842//vitamin binding;GO:0016641//oxidoreductase activity, acting on the CH-NH2 group of donors, oxygen as acceptor	GO:0050896//response to stimulus;GO:0003006//developmental process involved in reproduction;GO:0009692	gi|225447149|ref|XP_002275341.1|/8.33949e-170/PREDICTED: 1-aminocyclopropane-1-carboxylate oxidase 3 isoform 2 [Vitis vinifera]
GSVIVT01028222001	2.74744	0.809282	-	GO:0005576//extracellular region	GO:0046914//transition metal ion binding;GO:0004871//signal transducer activity;GO:0003824//catalytic activity;GO:0016209//antioxidant activity	GO:0008152//metabolic process	gi|225437732|ref|XP_002280619.1|/7.77041e-118/PREDICTED: germin-like protein subfamily 2 member 4 [Vitis vinifera]
GSVIVT01005906001	-1.73279	0.867286	K04733|1|8e-36|143|aly:ARALYDRAFT_916421|interleukin-1 receptor-associated kinase 4 [EC:2.7.11.1];K00924|3|1e-35|149|ath:AT1G24650|[EC:2.7.1.-]	-	GO:0004672//protein kinase activity	-	gi|225455116|ref|XP_002268775.1|/0/PREDICTED: probable receptor-like protein kinase At1g67000-like [Vitis vinifera]
GSVIVT01037043001	2.25561	0.849677	K00873|1|0.0|1100|vvi:100244565|pyruvate kinase [EC:2.7.1.40]	-	GO:0031420;GO:0016301//kinase activity	GO:0006796//phosphate-containing compound metabolic process;GO:0006007//glucose catabolic process	gi|225429183|ref|XP_002275785.1|/0/PREDICTED: pyruvate kinase isozyme A, chloroplastic [Vitis vinifera]
GSVIVT01000543001	5.73389	0.834215	K01090|1|3e-57|220|sbi:SORBI_01g038410|protein phosphatase [EC:3.1.3.16];K14497|2|1e-36|152|pop:POPTR_422871|protein phosphatase 2C [EC:3.1.3.16]	-	GO:0004721//phosphoprotein phosphatase activity	-	gi|296081360|emb|CBI16793.3|/0/unnamed protein product [Vitis vinifera]
GSVIVT01029368001	2.02726	0.873276	-	-	-	-	gi|296088005|emb|CBI35288.3|/0/unnamed protein product [Vitis vinifera]
GSVIVT01009430001	1.02976	0.808084	K13051|1|1e-171|600|vvi:100248834|beta-aspartyl-peptidase (threonine type) [EC:3.4.19.5]	-	GO:0016811//hydrolase activity, acting on carbon-nitrogen (but not peptide) bonds, in linear amides	GO:0009057//macromolecule catabolic process	gi|302142268|emb|CBI19471.3|/2.67505e-174/unnamed protein product [Vitis vinifera]
GSVIVT01010589001	-3.12189	0.853813	K13232|1|0.0|723|vvi:100250301|stilbene synthase [EC:2.3.1.95]	-	GO:0016747//transferase activity, transferring acyl groups other than amino-acyl groups	GO:0008152//metabolic process	gi|166229003|sp|A5C9M2.1|THS5_VITVI/0/RecName: Full=Stilbene synthase 5; AltName: Full=Resveratrol synthase 5; AltName: Full=Trihydroxystilbene synthase 5; Short=StSy 5
GSVIVT01037910001	-2.40866	0.892061	-	-	-	-	gi|225429295|ref|XP_002269470.1|/5.50568e-132/PREDICTED: uncharacterized protein LOC100254416 [Vitis vinifera]
GSVIVT01015282001	1.69451	0.870812	K14489|1|4e-15|81.6|vvi:100263145|arabidopsis histidine kinase 2/3/4 (cytokinin receptor) [EC:2.7.13.3]	GO:0005618//cell wall;GO:0031225//anchored to membrane;GO:0031410//cytoplasmic vesicle	GO:0043167//ion binding;GO:0008422//beta-glucosidase activity	GO:0044238//primary metabolic process	gi|225445059|ref|XP_002283473.1|/0/PREDICTED: glucan endo-1,3-beta-glucosidase 13 [Vitis vinifera]
GSVIVT01018536001	4.80036	0.831706	K13416|1|4e-64|244|ath:AT4G33430|brassinosteroid insensitive 1-associated receptor kinase 1 [EC:2.7.10.1 2.7.11.1];K13417|2|6e-64|243|aly:ARALYDRAFT_899604|somatic embryogenesis receptor kinase 4 [EC:2.7.10.1 2.7.11.1];K13418|3|8e-64|243|aly:ARALYDRAFT_895025|somatic embryogenesis receptor kinase 1 [EC:2.7.10.1 2.7.11.1]	GO:0031224//intrinsic to membrane	GO:0004871//signal transducer activity;GO:0004672//protein kinase activity;GO:0016628//oxidoreductase activity, acting on the CH-CH group of donors, NAD or NADP as acceptor;GO:0032559	GO:0006464//cellular protein modification process;GO:0007167//enzyme linked receptor protein signaling pathway	gi|296084139|emb|CBI24527.3|/0/unnamed protein product [Vitis vinifera]
GSVIVT01033197001	1.59984	0.818753	-	-	-	-	gi|296083804|emb|CBI24021.3|/0/unnamed protein product [Vitis vinifera]
GSVIVT01007593001	-2.91723	0.915638	K13428|1|1e-17|89.0|ath:AT5G20480|LRR receptor-like serine/threonine-protein kinase EFR [EC:2.7.11.1]	GO:0016020//membrane	GO:0004674//protein serine/threonine kinase activity;GO:0032559	GO:0006952//defense response;GO:0008219//cell death;GO:0007167//enzyme linked receptor protein signaling pathway;GO:0051093//negative regulation of developmental process;GO:0006464//cellular protein modification process	gi|297733660|emb|CBI14907.3|/0/unnamed protein product [Vitis vinifera]
GSVIVT01029589001	7.03482	0.925562	-	-	-	-	gi|297735777|emb|CBI18464.3|/7.87139e-13/unnamed protein product [Vitis vinifera]
GSVIVT01029227001	1.99951	0.823432	K13289|1|8e-113|405|mtr:MTR_4g021500|cathepsin A (carboxypeptidase C) [EC:3.4.16.5];K09756|3|6e-108|389|ath:AT5G09640|serine carboxypeptidase-like 19 [EC:3.4.16.- 2.3.1.91]	-	GO:0004180//carboxypeptidase activity	GO:0019538//protein metabolic process	gi|225446024|ref|XP_002268517.1|/0/PREDICTED: serine carboxypeptidase-like 18 [Vitis vinifera]
GSVIVT01019734001	-1.12827	0.83261	K01535|1|0.0|1575|vvi:100246127|H+-transporting ATPase [EC:3.6.3.6]	GO:0031224//intrinsic to membrane	GO:0042625//ATPase activity, coupled to transmembrane movement of ions;GO:0032559	GO:0009206;GO:0006811//ion transport;GO:0009207	gi|297742504|emb|CBI34653.3|/0/unnamed protein product [Vitis vinifera]
GSVIVT01033862001	1.00913	0.834961	K03106|1|0.0|922|vvi:100247624|signal recognition particle subunit SRP54	GO:0048500//signal recognition particle;GO:0009532//plastid stroma	GO:0042277//peptide binding;GO:0003723//RNA binding;GO:0032561//guanyl ribonucleotide binding;GO:0016462//pyrophosphatase activity	GO:0006614//SRP-dependent cotranslational protein targeting to membrane	gi|359481606|ref|XP_002276439.2|/0/PREDICTED: signal recognition particle 54 kDa protein, chloroplastic-like [Vitis vinifera]
GSVIVT01017806001	2.13878	0.809123	-	-	-	-	gi|359477302|ref|XP_002276724.2|/1.12593e-10/PREDICTED: uncharacterized protein LOC100245973 [Vitis vinifera]
GSVIVT01030716001	1.62192	0.843732	K14489|1|2e-16|85.9|vvi:100263145|arabidopsis histidine kinase 2/3/4 (cytokinin receptor) [EC:2.7.13.3]	-	GO:0043167//ion binding;GO:0008422//beta-glucosidase activity	GO:0044238//primary metabolic process	gi|296087105|emb|CBI33479.3|/0/unnamed protein product [Vitis vinifera]
GSVIVT01035726001	1.5196	0.855712	-	GO:0009523//photosystem II;GO:0009534//chloroplast thylakoid	GO:0046872//metal ion binding	GO:0044237//cellular metabolic process	gi|225430097|ref|XP_002284586.1|/9.82228e-163/PREDICTED: psbP domain-containing protein 5, chloroplastic [Vitis vinifera]
GSVIVT01013440001	4.65174	0.93804	K00924|1|2e-149|527|ath:AT1G76540|[EC:2.7.1.-];K07760|4|4e-112|402|ath:AT3G54180|cyclin-dependent kinase [EC:2.7.11.22];K02206|5|9e-94|342|osa:4331415|cyclin-dependent kinase 2 [EC:2.7.11.22]	-	GO:0004674//protein serine/threonine kinase activity;GO:0032559	GO:0006464//cellular protein modification process	gi|225457670|ref|XP_002276150.1|/0/PREDICTED: cyclin-dependent kinase B2-1-like [Vitis vinifera]
GSVIVT01032631001	1.16237	0.849338	K11254|1|7e-26|115|mtr:MTR_2g096100|histone H4	GO:0000785//chromatin;GO:0031090//organelle membrane;GO:0009536//plastid	GO:0003676//nucleic acid binding	GO:0034728//nucleosome organization	gi|470116831|ref|XP_004294578.1|/7.45488e-25/PREDICTED: histone H4-like [Fragaria vesca subsp. vesca]
GSVIVT01025798001	1.96896	0.860459	-	GO:0044464//cell part	-	-	gi|225440165|ref|XP_002283348.1|/0/PREDICTED: auxin-induced protein 5NG4 isoform 1 [Vitis vinifera]
GSVIVT01008423001	1.86109	0.901985	-	GO:0044464//cell part	-	GO:0009607//response to biotic stimulus	gi|147818820|emb|CAN59843.1|/4.74021e-144/hypothetical protein VITISV_030359 [Vitis vinifera]
GSVIVT01013914001	-3.67642	0.902505	K09286|1|1e-72|239|vvi:100254616|EREBP-like factor	-	-	-	gi|297745005|emb|CBI38597.3|/1.29113e-133/unnamed protein product [Vitis vinifera]
GSVIVT01030274001	4.13463	0.861703	K13420|1|1e-27|122|vvi:100253808|LRR receptor-like serine/threonine-protein kinase FLS2 [EC:2.7.11.1]	GO:0044464//cell part	GO:0004672//protein kinase activity	GO:0009987//cellular process;GO:0008152//metabolic process	gi|297735611|emb|CBI18105.3|/4.89302e-162/unnamed protein product [Vitis vinifera]
GSVIVT01003139001	5.51047	0.965889	K11251|1|2e-59|226|vvi:100257988|histone H2A	GO:0043231//intracellular membrane-bounded organelle;GO:0000785//chromatin	GO:0003676//nucleic acid binding	GO:0006952//defense response;GO:0009266//response to temperature stimulus;GO:0009791//post-embryonic development;GO:0034728//nucleosome organization	gi|225437178|ref|XP_002281266.1|/2.99264e-58/PREDICTED: histone H2A variant 1 [Vitis vinifera]
GSVIVT01029765001	1.80688	0.838058	K07213|1|5e-13|73.6|sbi:SORBI_08g022260|copper chaperone	-	GO:0043169//cation binding	GO:0006812//cation transport	gi|296081526|emb|CBI20049.3|/4.30445e-133/unnamed protein product [Vitis vinifera]
GSVIVT01036671001	3.8491	0.941295	K00924|1|3e-19|95.1|aly:ARALYDRAFT_489138|[EC:2.7.1.-]	GO:0005618//cell wall	GO:0004175//endopeptidase activity	GO:0019538//protein metabolic process	gi|225465837|ref|XP_002264626.1|/0/PREDICTED: aspartic proteinase nepenthesin-1-like isoform 1 [Vitis vinifera]
GSVIVT01000546001	1.89919	0.803178	K01206|1|1e-123|441|ath:AT1G67830|alpha-L-fucosidase [EC:3.2.1.51];K00514|3|4e-35|147|rcu:RCOM_1428040|zeta-carotene desaturase [EC:1.3.5.6]	-	GO:0016787//hydrolase activity	GO:0044238//primary metabolic process	gi|225424649|ref|XP_002285512.1|/0/PREDICTED: GDSL esterase/lipase At3g26430 [Vitis vinifera]
GSVIVT01023688001	1.29463	0.845065	K13289|1|0.0|692|rcu:RCOM_1406210|cathepsin A (carboxypeptidase C) [EC:3.4.16.5];K08249|3|1e-150|531|vvi:100251399|hydroxymandelonitrile lyase [EC:4.1.2.11]	GO:0043231//intracellular membrane-bounded organelle	GO:0004180//carboxypeptidase activity	GO:0019538//protein metabolic process	gi|225445776|ref|XP_002273324.1|/0/PREDICTED: serine carboxypeptidase-like 29 [Vitis vinifera]
GSVIVT01030528001	-1.55955	0.86593	K01206|1|1e-26|120|aly:ARALYDRAFT_475890|alpha-L-fucosidase [EC:3.2.1.51];K00514|5|8e-23|107|rcu:RCOM_1428040|zeta-carotene desaturase [EC:1.3.5.6]	-	GO:0016787//hydrolase activity	GO:0044238//primary metabolic process	gi|297739233|emb|CBI28884.3|/0/unnamed protein product [Vitis vinifera]
GSVIVT01015036001	1.6569	0.899611	K04078|1|1e-42|172|cre:CHLREDRAFT_188610|chaperonin GroES	GO:0009532//plastid stroma;GO:0009526//plastid envelope;GO:0009534//chloroplast thylakoid;GO:0005576//extracellular region	GO:0046914//transition metal ion binding;GO:0005515//protein binding;GO:0032559	GO:0010038//response to metal ion;GO:0044267//cellular protein metabolic process;GO:0006950//response to stress	gi|50660327|gb|AAT80888.1|/6.85769e-136/chloroplast chaperonin 21 [Vitis vinifera]
GSVIVT01035323001	4.60258	0.916972	K08850|1|1e-170|597|vvi:100268070|aurora kinase, other [EC:2.7.11.1]	GO:0015630//microtubule cytoskeleton;GO:0031981//nuclear lumen	GO:0035174//histone serine kinase activity;GO:0032559	GO:0035404//histone-serine phosphorylation	gi|225429402|ref|XP_002275382.1|/1.73706e-169/PREDICTED: serine/threonine-protein kinase Aurora-1 [Vitis vinifera]
GSVIVT01013935001	-1.63788	0.873412	K09286|1|1e-37|155|vvi:100254616|EREBP-like factor	-	-	-	gi|225455050|ref|XP_002282181.1|/2.08349e-82/PREDICTED: ethylene-responsive transcription factor 5 [Vitis vinifera]
GSVIVT01009362001	2.58079	0.811452	-	-	-	-	gi|302142214|emb|CBI19417.3|/1.74418e-51/unnamed protein product [Vitis vinifera]
GSVIVT01013218001	1.03525	0.802771	K01528|1|8e-73|273|cme:CME019C|dynamin GTPase [EC:3.6.5.5]	-	GO:0032561//guanyl ribonucleotide binding;GO:0017111//nucleoside-triphosphatase activity	GO:0009207	gi|225427288|ref|XP_002281722.1|/0/PREDICTED: dynamin-related protein 1E isoform 1 [Vitis vinifera]
GSVIVT01006576001	-1.26421	0.86324	K04708|1|2e-07|55.5|cre:CHLREDRAFT_55666|3-dehydrosphinganine reductase [EC:1.1.1.102];K00059|3|2e-06|51.6|bdi:100843198|3-oxoacyl-[acyl-carrier protein] reductase [EC:1.1.1.100]	-	GO:0003824//catalytic activity	GO:0008152//metabolic process	gi|297739381|emb|CBI29397.3|/7.09682e-161/unnamed protein product [Vitis vinifera]
GSVIVT01034111001	-1.1178	0.832791	K11493|1|1e-11|69.7|ota:Ot03g05690|regulator of chromosome condensation;K10615|4|4e-11|67.8|cme:CMB070C|E3 ubiquitin-protein ligase HERC4 [EC:6.3.2.19]	-	-	-	gi|359482088|ref|XP_002271900.2|/0/PREDICTED: probable E3 ubiquitin-protein ligase HERC3-like isoform 1 [Vitis vinifera]
GSVIVT01008954001	-1.0723	0.839753	K00600|1|0.0|1061|vvi:100267713|glycine hydroxymethyltransferase [EC:2.1.2.1]	-	GO:0016742//hydroxymethyl-, formyl- and related transferase activity;GO:0048037//cofactor binding	GO:0006730//one-carbon metabolic process;GO:0009069//serine family amino acid metabolic process	gi|302141890|emb|CBI19093.3|/0/unnamed protein product [Vitis vinifera]
GSVIVT01011616001	-4.66132	0.802251	-	-	GO:0016874//ligase activity	-	gi|297737596|emb|CBI26797.3|/3.39986e-165/unnamed protein product [Vitis vinifera]
GSVIVT01038723001	-2.09862	0.876328	K04733|1|2e-46|184|smo:SELMODRAFT_159261|interleukin-1 receptor-associated kinase 4 [EC:2.7.11.1];K13416|2|2e-46|184|ath:AT4G33430|brassinosteroid insensitive 1-associated receptor kinase 1 [EC:2.7.10.1 2.7.11.1];K13418|3|3e-46|184|vvi:100247683|somatic embryogenesis receptor kinase 1 [EC:2.7.10.1 2.7.11.1]	-	-	-	gi|302144048|emb|CBI23153.3|/0/unnamed protein product [Vitis vinifera]
GSVIVT01016881001	2.04457	0.908518	K13248|1|2e-150|530|vvi:100248102|pyridoxal phosphate phosphatase PHOSPHO2 [EC:3.1.3.74]	-	GO:0016791//phosphatase activity	GO:0006796//phosphate-containing compound metabolic process	gi|225442331|ref|XP_002280867.1|/2.03728e-149/PREDICTED: inorganic pyrophosphatase 2 [Vitis vinifera]
GSVIVT01005518001	3.33162	0.872327	K00759|1|2e-41|166|gmx:100306411|adenine phosphoribosyltransferase [EC:2.4.2.7]	GO:0044424//intracellular part	GO:0016763//transferase activity, transferring pentosyl groups	GO:0043096//purine nucleobase salvage	gi|359497689|ref|XP_002268529.2|/2.36874e-45/PREDICTED: adenine phosphoribosyltransferase 1 [Vitis vinifera]
GSVIVT01021443001	2.18369	0.829332	-	GO:0031224//intrinsic to membrane	-	-	gi|225444537|ref|XP_002275370.1|/0/PREDICTED: uncharacterized protein LOC100253669 [Vitis vinifera]
GSVIVT01015895001	-1.40165	0.878702	-	-	-	GO:0010876//lipid localization	gi|359475712|ref|XP_003631735.1|/2.12175e-44/PREDICTED: uncharacterized protein LOC100233114 [Vitis vinifera]
GSVIVT01001005001	2.10174	0.858086	-	GO:0044464//cell part	-	-	gi|225450256|ref|XP_002269148.1|/0/PREDICTED: uncharacterized protein LOC100251081 [Vitis vinifera]
GSVIVT01003175001	2.77546	0.920476	K14505|1|5e-165|579|vvi:100264093|cyclin D3, plant	GO:0043231//intracellular membrane-bounded organelle	-	GO:0009987//cellular process	gi|296090459|emb|CBI40278.3|/1.31149e-167/unnamed protein product [Vitis vinifera]
GSVIVT01034092001	1.2283	0.822845	K00761|1|4e-159|559|vvi:100261300|uracil phosphoribosyltransferase [EC:2.4.2.9]	GO:0009536//plastid	GO:0016772//transferase activity, transferring phosphorus-containing groups;GO:0016763//transferase activity, transferring pentosyl groups;GO:0032561//guanyl ribonucleotide binding;GO:0032559	GO:0019860//uracil metabolic process;GO:0009267//cellular response to starvation	gi|225440492|ref|XP_002273489.1|/5.22492e-158/PREDICTED: uracil phosphoribosyltransferase [Vitis vinifera]
GSVIVT01021978001	6.14023	0.881188	K13832|1|0.0|1048|vvi:100248678|3-dehydroquinate dehydratase / shikimate dehydrogenase [EC:4.2.1.10 1.1.1.25]	GO:0044424//intracellular part	GO:0016616//oxidoreductase activity, acting on the CH-OH group of donors, NAD or NADP as acceptor;GO:0016836//hydro-lyase activity;GO:0000166//nucleotide binding	GO:0008652//cellular amino acid biosynthetic process	gi|225451146|ref|XP_002270188.1|/0/PREDICTED: bifunctional 3-dehydroquinate dehydratase/shikimate dehydrogenase, chloroplastic [Vitis vinifera]
GSVIVT01002482001	-5.3592	0.815114	K04733|1|2e-36|152|smo:SELMODRAFT_33807|interleukin-1 receptor-associated kinase 4 [EC:2.7.11.1];K13430|2|4e-33|141|osa:4329463|serine/threonine-protein kinase PBS1 [EC:2.7.11.1]	-	GO:0004672//protein kinase activity;GO:0000166//nucleotide binding	-	gi|296088918|emb|CBI38478.3|/0/unnamed protein product [Vitis vinifera]
GSVIVT01026562001	-3.25568	0.812017	-	-	-	-	gi|296088596|emb|CBI37587.3|/5.54631e-49/unnamed protein product [Vitis vinifera]
GSVIVT01019775001	2.28236	0.889936	K07375|1|6e-154|400|ath:AT5G23860|tubulin beta	GO:0043234//protein complex;GO:0015630//microtubule cytoskeleton	GO:0017111//nucleoside-triphosphatase activity;GO:0032561//guanyl ribonucleotide binding	GO:0043623//cellular protein complex assembly;GO:0009207;GO:0006970//response to osmotic stress;GO:0007017//microtubule-based process	gi|395146535|gb|AFN53689.1|/7.61778e-153/putative tubulin beta-1 chain protein [Linum usitatissimum]
GSVIVT01026137001	2.36427	0.89457	K04564|1|1e-63|241|pop:POPTR_253123|superoxide dismutase, Fe-Mn family [EC:1.15.1.1]	GO:0009536//plastid	GO:0016209//antioxidant activity;GO:0043169//cation binding;GO:0003824//catalytic activity	GO:0006801//superoxide metabolic process	gi|296085263|emb|CBI28995.3|/0/unnamed protein product [Vitis vinifera]
GSVIVT01014572001	1.20875	0.863647	K02895|1|5e-92|336|vvi:100250357|large subunit ribosomal protein L24	GO:0009532//plastid stroma;GO:0030529//ribonucleoprotein complex	GO:0003723//RNA binding;GO:0005198//structural molecule activity	GO:0010467//gene expression	gi|302143191|emb|CBI20486.3|/2.33409e-120/unnamed protein product [Vitis vinifera]
GSVIVT01024994001	-2.75608	0.918599	K03283|1|5e-119|426|ath:AT5G02500|heat shock 70kDa protein 1/8	GO:0005840//ribosome;GO:0030312//external encapsulating structure;GO:0031981//nuclear lumen;GO:0009536//plastid;GO:0031090//organelle membrane;GO:0005576//extracellular region	GO:0019899//enzyme binding	GO:0006952//defense response;GO:0051707//response to other organism;GO:0010038//response to metal ion;GO:0008152//metabolic process	gi|297746101|emb|CBI16157.3|/3.16065e-125/unnamed protein product [Vitis vinifera]
GSVIVT01011382001	4.69761	0.964827	K07374|1|0.0|685|vvi:100247366|tubulin alpha	GO:0032991//macromolecular complex;GO:0015630//microtubule cytoskeleton	GO:0017111//nucleoside-triphosphatase activity;GO:0032561//guanyl ribonucleotide binding	GO:0043623//cellular protein complex assembly;GO:0009207;GO:0007017//microtubule-based process	gi|296082889|emb|CBI22190.3|/0/unnamed protein product [Vitis vinifera]
GSVIVT01032782001	4.18138	0.823478	K05868|1|0.0|644|vvi:100261859|cyclin B	GO:0043231//intracellular membrane-bounded organelle	-	GO:0009987//cellular process	gi|225448497|ref|XP_002273378.1|/0/PREDICTED: G2/mitotic-specific cyclin-1 [Vitis vinifera]
GSVIVT01013931001	-2.11159	0.889416	K09286|1|7e-60|228|vvi:100254616|EREBP-like factor	-	-	-	gi|297745016|emb|CBI38608.3|/1.46461e-90/unnamed protein product [Vitis vinifera]
GSVIVT01017690001	-1.21939	0.856549	K00924|1|6e-111|399|osa:4342410|[EC:2.7.1.-];K07198|3|7e-58|223|aly:ARALYDRAFT_317081|5'-AMP-activated protein kinase, catalytic alpha subunit [EC:2.7.11.11]	GO:0016020//membrane	GO:0004674//protein serine/threonine kinase activity;GO:0032559	GO:0009725//response to hormone stimulus;GO:0006464//cellular protein modification process;GO:0006970//response to osmotic stress;GO:0023052//signaling	gi|297736814|emb|CBI26015.3|/0/unnamed protein product [Vitis vinifera]
GSVIVT01017318001	-1.59838	0.837967	-	-	-	-	gi|225442979|ref|XP_002268235.1|/6.46396e-63/PREDICTED: uncharacterized protein LOC100261053 [Vitis vinifera]
GSVIVT01013917001	-4.08509	0.917966	K09286|1|2e-126|450|vvi:100254616|EREBP-like factor	GO:0043231//intracellular membrane-bounded organelle	GO:0003676//nucleic acid binding;GO:0001071//nucleic acid binding transcription factor activity	GO:0006351//transcription, DNA-dependent	gi|297745008|emb|CBI38600.3|/0/unnamed protein product [Vitis vinifera]
GSVIVT01035306001	-2.94	0.85257	K00924|1|2e-41|167|ath:AT5G25930|[EC:2.7.1.-]	-	-	-	gi|359475923|ref|XP_003631770.1|/9.60062e-107/PREDICTED: receptor-like protein kinase HSL1-like [Vitis vinifera]
GSVIVT01017208001	3.54914	0.818098	-	-	-	-	gi|297743366|emb|CBI36233.3|/0/unnamed protein product [Vitis vinifera]
GSVIVT01010582001	-3.71378	0.845879	K13232|1|0.0|751|vvi:100241891|stilbene synthase [EC:2.3.1.95]	-	-	-	gi|359490334|ref|XP_003634074.1|/0/PREDICTED: stilbene synthase 4-like [Vitis vinifera]
GSVIVT01015426001	-1.23749	0.811067	-	-	GO:0003824//catalytic activity	-	gi|225445312|ref|XP_002284711.1|/2.70967e-140/PREDICTED: sigma factor sigB regulation protein rsbQ isoform 1 [Vitis vinifera]
GSVIVT01019490001	-1.0039	0.844025	-	-	-	-	gi|297742302|emb|CBI34451.3|/1.44804e-65/unnamed protein product [Vitis vinifera]
GSVIVT01019664001	1.59111	0.847642	K01179|1|2e-125|447|sbi:SORBI_02g030710|endoglucanase [EC:3.2.1.4]	-	GO:0004553//hydrolase activity, hydrolyzing O-glycosyl compounds	GO:0003006//developmental process involved in reproduction;GO:0009251//glucan catabolic process	gi|297742445|emb|CBI34594.3|/0/unnamed protein product [Vitis vinifera]
GSVIVT01008490001	1.44079	0.822709	-	GO:0000229;GO:0009536//plastid	GO:0003676//nucleic acid binding	-	gi|225456246|ref|XP_002279352.1|/0/PREDICTED: uncharacterized protein LOC100264639 [Vitis vinifera]
GSVIVT01032858001	-2.18265	0.869569	-	-	-	GO:0042742//defense response to bacterium;GO:0010033//response to organic substance	gi|297736638|emb|CBI25509.3|/0/unnamed protein product [Vitis vinifera]
GSVIVT01024081001	-1.06988	0.855825	-	-	-	-	gi|359475044|ref|XP_003631574.1|/4.00165e-107/PREDICTED: uncharacterized protein LOC100245206 [Vitis vinifera]
GSVIVT01030181001	1.13417	0.828315	K02356|1|1e-122|437|vvi:100241479|elongation factor P	GO:0043231//intracellular membrane-bounded organelle	GO:0008135//translation factor activity, nucleic acid binding	GO:0006518//peptide metabolic process;GO:0006412//translation	gi|225439691|ref|XP_002267558.1|/1.72768e-121/PREDICTED: elongation factor P [Vitis vinifera]
GSVIVT01001039001	-1.04388	0.809259	-	-	-	-	gi|296084584|emb|CBI25605.3|/1.88025e-32/unnamed protein product [Vitis vinifera]
GSVIVT01009317001	-2.88494	0.817148	-	-	-	-	gi|302142175|emb|CBI19378.3|/3.40337e-63/unnamed protein product [Vitis vinifera]
GSVIVT01022242001	-1.52149	0.87626	K15405|1|2e-20|95.5|aly:ARALYDRAFT_474859|cytochrome P450, family 96, subfamily A, polypeptide 15 (midchain alkane hydroxylase);K00517|3|2e-18|89.0|ath:AT5G52320|[EC:1.14.-.-];K15402|5|1e-12|69.7|rcu:RCOM_1376710|cytochrome P450, family 86, subfamily B, polypeptide 1 (fatty acid omega-hydroxylase) [EC:1.14.-.-]	-	GO:0005506//iron ion binding;GO:0004497//monooxygenase activity	-	gi|296082514|emb|CBI21519.3|/4.15434e-68/unnamed protein product [Vitis vinifera]
GSVIVT01010583001	-3.95125	0.902618	K13232|1|0.0|733|vvi:100241891|stilbene synthase [EC:2.3.1.95]	-	-	-	gi|147821222|emb|CAN72348.1|/0/hypothetical protein VITISV_020801 [Vitis vinifera]
GSVIVT01000846001	2.94559	0.903228	-	-	-	-	gi|359495088|ref|XP_002266452.2|/8.02357e-90/PREDICTED: disease resistance response protein 206-like [Vitis vinifera]
GSVIVT01012712001	-1.64783	0.901578	K05907|1|2e-162|570|aly:ARALYDRAFT_911717|adenylyl-sulfate reductase (glutathione) [EC:1.8.4.9]	-	GO:0016671//oxidoreductase activity, acting on a sulfur group of donors, disulfide as acceptor	GO:0006790//sulfur compound metabolic process;GO:0019725//cellular homeostasis	gi|302144128|emb|CBI23233.3|/0/unnamed protein product [Vitis vinifera]
GSVIVT01024815001	2.82208	0.872304	K04802|1|4e-148|522|vvi:100248466|proliferating cell nuclear antigen	GO:0043234//protein complex;GO:0043231//intracellular membrane-bounded organelle	GO:0003676//nucleic acid binding;GO:0030234//enzyme regulator activity	GO:0006260//DNA replication	gi|225434712|ref|XP_002281090.1|/5.24302e-147/PREDICTED: proliferating cell nuclear antigen [Vitis vinifera]
GSVIVT01034503001	1.21591	0.836815	K02717|1|4e-39|160|osa:4348816|photosystem II oxygen-evolving enhancer protein 2;K09553|2|4e-07|54.3|gmx:100780296|stress-induced-phosphoprotein 1	GO:0009534//chloroplast thylakoid	-	GO:0043623//cellular protein complex assembly	gi|225460696|ref|XP_002270347.1|/1.90677e-179/PREDICTED: uncharacterized protein LOC100243534 [Vitis vinifera]
GSVIVT01034949001	1.51153	0.833356	K13289|1|0.0|957|vvi:100263750|cathepsin A (carboxypeptidase C) [EC:3.4.16.5]	-	GO:0004180//carboxypeptidase activity	GO:0019538//protein metabolic process	gi|225432045|ref|XP_002280311.1|/0/PREDICTED: serine carboxypeptidase-like 33 isoform 4 [Vitis vinifera]
GSVIVT01016000001	-4.14983	0.808558	K13420|1|6e-77|287|ath:AT5G46330|LRR receptor-like serine/threonine-protein kinase FLS2 [EC:2.7.11.1]	-	-	-	gi|298204700|emb|CBI25198.3|/0/unnamed protein product [Vitis vinifera]
GSVIVT01017339001	-1.07469	0.827863	K00507|1|0.0|782|vvi:100249077|stearoyl-CoA desaturase (delta-9 desaturase) [EC:1.14.19.1]	GO:0031224//intrinsic to membrane;GO:0044424//intracellular part	GO:0016717//oxidoreductase activity, acting on paired donors, with oxidation of a pair of donors resulting in the reduction of molecular oxygen to two molecules of water	GO:0006633//fatty acid biosynthetic process;GO:0009767//photosynthetic electron transport chain	gi|225442947|ref|XP_002265410.1|/0/PREDICTED: palmitoyl-monogalactosyldiacylglycerol delta-7 desaturase, chloroplastic [Vitis vinifera]
GSVIVT01013934001	-2.47988	0.895294	K09286|1|6e-54|210|vvi:100254616|EREBP-like factor	-	-	-	gi|297745018|emb|CBI38610.3|/0/unnamed protein product [Vitis vinifera]
GSVIVT01013355001	-1.18754	0.835458	K00030|1|5e-155|546|vvi:100242228|isocitrate dehydrogenase (NAD+) [EC:1.1.1.41];K09588|2|8e-73|273|gmx:100775886|cytochrome P450, family 90, subfamily A, polypeptide 1 [EC:1.14.-.-];K12640|4|2e-71|268|vvi:100232983|cytochrome P450, family 85, subfamily A, polypeptide 2 (brassinosteroid-6-oxidase 2) [EC:1.14.-.-]	-	GO:0005506//iron ion binding;GO:0004497//monooxygenase activity	GO:0008152//metabolic process	gi|297745539|emb|CBI40704.3|/0/unnamed protein product [Vitis vinifera]
GSVIVT01025214001	2.37019	0.908947	K10775|1|0.0|877|pop:POPTR_228016|phenylalanine ammonia-lyase [EC:4.3.1.24]	GO:0044424//intracellular part	GO:0016840	GO:0006558//L-phenylalanine metabolic process	gi|297746280|emb|CBI16336.3|/0/unnamed protein product [Vitis vinifera]
GSVIVT01035098001	1.72742	0.825512	K09286|1|8e-31|132|ath:AT3G16770|EREBP-like factor	GO:0043231//intracellular membrane-bounded organelle	GO:0003676//nucleic acid binding;GO:0001071//nucleic acid binding transcription factor activity	GO:0006351//transcription, DNA-dependent	gi|225431800|ref|XP_002272426.1|/1.61586e-110/PREDICTED: ethylene-responsive transcription factor RAP2-3 [Vitis vinifera]
GSVIVT01032681001	-1.25859	0.873299	-	GO:0044464//cell part	-	-	gi|29421120|dbj|BAC66695.1|/2.38329e-138/expansin [Vitis labrusca x Vitis vinifera]
GSVIVT01018625001	2.18889	0.90741	K01193|1|0.0|1307|vvi:100256970|beta-fructofuranosidase [EC:3.2.1.26]	-	GO:0004553//hydrolase activity, hydrolyzing O-glycosyl compounds	GO:0008152//metabolic process	gi|225466093|ref|XP_002265534.1|/0/PREDICTED: beta-fructofuranosidase, soluble isoenzyme I-like [Vitis vinifera]
GSVIVT01015772001	1.1526	0.806818	K02548|1|4e-171|599|vvi:100256517|1,4-dihydroxy-2-naphthoate octaprenyltransferase [EC:2.5.1.74 2.5.1.-]	GO:0016020//membrane;GO:0009536//plastid	GO:0002094//polyprenyltransferase activity	GO:0042371//vitamin K biosynthetic process;GO:0009767//photosynthetic electron transport chain	gi|296087485|emb|CBI34074.3|/0/unnamed protein product [Vitis vinifera]
GSVIVT01037727001	1.26134	0.83053	-	GO:0055028//cortical microtubule	GO:0015631//tubulin binding	GO:0022403;GO:0030865//cortical cytoskeleton organization;GO:0031112	gi|297737498|emb|CBI26699.3|/0/unnamed protein product [Vitis vinifera]
GSVIVT01024049001	3.20349	0.818504	-	-	GO:0004553//hydrolase activity, hydrolyzing O-glycosyl compounds;GO:0043167//ion binding	GO:0000272//polysaccharide catabolic process	gi|297744631|emb|CBI37893.3|/0/unnamed protein product [Vitis vinifera]
GSVIVT01024713001	-1.22688	0.823342	K01953|1|0.0|1171|vvi:100241610|asparagine synthase (glutamine-hydrolysing) [EC:6.3.5.4]	-	GO:0016884//carbon-nitrogen ligase activity, with glutamine as amido-N-donor	GO:0009642//response to light intensity;GO:0006528//asparagine metabolic process;GO:0009746;GO:0034285;GO:0009267//cellular response to starvation	gi|225434548|ref|XP_002277103.1|/0/PREDICTED: asparagine synthetase [glutamine-hydrolyzing] [Vitis vinifera]
GSVIVT01014632001	-1.78643	0.804105	K05666|1|2e-124|446|olu:OSTLU_35503|ATP-binding cassette, subfamily C (CFTR/MRP), member 2;K05658|3|3e-42|173|ath:AT3G28345|ATP-binding cassette, subfamily B (MDR/TAP), member 1	-	GO:0017111//nucleoside-triphosphatase activity	-	gi|296089882|emb|CBI39701.3|/0/unnamed protein product [Vitis vinifera]
GSVIVT01008212001	-2.27347	0.876034	K04733|1|9e-58|224|smo:SELMODRAFT_230241|interleukin-1 receptor-associated kinase 4 [EC:2.7.11.1];K13415|3|1e-53|210|sbi:SORBI_03g032990|protein brassinosteroid insensitive 1 [EC:2.7.10.1 2.7.11.1]	-	GO:0004672//protein kinase activity	-	gi|297734146|emb|CBI15393.3|/0/unnamed protein product [Vitis vinifera]
GSVIVT01020177001	1.88323	0.80614	K11820|1|8e-108|389|ath:AT1G24100|N-hydroxythioamide S-beta-glucosyltransferase [EC:2.4.1.195];K13691|3|9e-104|375|vvi:100242294|pathogen-inducible salicylic acid glucosyltransferase [EC:2.4.1.-]	-	GO:0016757//transferase activity, transferring glycosyl groups	-	gi|296086510|emb|CBI32099.3|/0/unnamed protein product [Vitis vinifera]
GSVIVT01012059001	1.12436	0.82246	K13289|1|5e-152|536|gmx:100807887|cathepsin A (carboxypeptidase C) [EC:3.4.16.5]	GO:0044464//cell part	GO:0004180//carboxypeptidase activity	GO:0019538//protein metabolic process	gi|359472738|ref|XP_002276960.2|/0/PREDICTED: serine carboxypeptidase-like 35-like [Vitis vinifera]
GSVIVT01009432001	1.84614	0.881301	K14505|1|1e-96|352|vvi:100264093|cyclin D3, plant	GO:0043231//intracellular membrane-bounded organelle	-	GO:0009987//cellular process	gi|225458713|ref|XP_002285001.1|/2.26306e-177/PREDICTED: cyclin-D3-1 [Vitis vinifera]
GSVIVT01008671001	3.49332	0.877639	-	-	-	-	gi|225459872|ref|XP_002285934.1|/1.20207e-111/PREDICTED: uncharacterized protein LOC100264304 [Vitis vinifera]
GSVIVT01024935001	-1.1214	0.802229	K14494|1|8e-08|58.2|aly:ARALYDRAFT_477591|DELLA protein	-	-	-	gi|297746056|emb|CBI16112.3|/0/unnamed protein product [Vitis vinifera]
GSVIVT01017471001	1.20399	0.830621	-	GO:0000229;GO:0009532//plastid stroma	-	-	gi|359482400|ref|XP_002268800.2|/0/PREDICTED: COBW domain-containing protein 2-like isoform 1 [Vitis vinifera]
GSVIVT01034194001	-1.85741	0.90533	K03283|1|7e-12|67.8|vvi:100259551|heat shock 70kDa protein 1/8;K09490|3|7e-12|67.8|ath:AT5G42020|heat shock 70kDa protein 5	GO:0043231//intracellular membrane-bounded organelle	GO:0032559	GO:0050896//response to stimulus	gi|297740391|emb|CBI30573.3|/2.18078e-34/unnamed protein product [Vitis vinifera]
GSVIVT01025019001	1.04279	0.84719	K11251|1|7e-45|179|vvi:100241700|histone H2A	GO:0000785//chromatin;GO:0043231//intracellular membrane-bounded organelle	GO:0003676//nucleic acid binding	GO:0034728//nucleosome organization	gi|225435042|ref|XP_002284305.1|/8.33936e-44/PREDICTED: probable histone H2A.4 isoform 1 [Vitis vinifera]
GSVIVT01001297001	-2.27926	0.91652	-	-	-	-	gi|297741173|emb|CBI31904.3|/1.01877e-23/unnamed protein product [Vitis vinifera]
GSVIVT01032138001	4.85699	0.922126	K03164|1|0.0|2392|vvi:100253371|DNA topoisomerase II [EC:5.99.1.3]	GO:0043232	GO:0001071//nucleic acid binding transcription factor activity;GO:0003916//DNA topoisomerase activity;GO:0032559	GO:0006259//DNA metabolic process;GO:0006351//transcription, DNA-dependent	gi|297736284|emb|CBI24922.3|/0/unnamed protein product [Vitis vinifera]
GSVIVT01019504001	4.75261	0.943578	K09273|1|7e-54|210|ppp:PHYPADRAFT_210318|upstream-binding transcription factor;K10802|3|5e-12|71.2|cre:CHLREDRAFT_142283|high mobility group protein B1	-	-	-	gi|225426010|ref|XP_002273198.1|/6.34981e-174/PREDICTED: high mobility group B protein 13-like [Vitis vinifera]
GSVIVT01024060001	-1.06052	0.838419	-	-	GO:0004620//phospholipase activity;GO:0042578//phosphoric ester hydrolase activity	GO:0044238//primary metabolic process;GO:0007165//signal transduction	gi|297744640|emb|CBI37902.3|/9.14023e-91/unnamed protein product [Vitis vinifera]
GSVIVT01016095001	5.28449	0.913355	-	-	GO:0001071//nucleic acid binding transcription factor activity	GO:0006351//transcription, DNA-dependent	gi|147827171|emb|CAN62178.1|/0/hypothetical protein VITISV_016672 [Vitis vinifera]
GSVIVT01037929001	1.20951	0.86715	K02879|1|3e-91|333|vvi:100263106|large subunit ribosomal protein L17	GO:0030529//ribonucleoprotein complex;GO:0009536//plastid	GO:0003723//RNA binding;GO:0005198//structural molecule activity	GO:0010467//gene expression	gi|225444201|ref|XP_002275983.1|/4.4654e-90/PREDICTED: 50S ribosomal protein L17, chloroplastic-like [Vitis vinifera]
GSVIVT01018044001	1.91694	0.908495	-	-	-	-	gi|295442600|gb|ADG21226.1|/1.09688e-83/chloroplast ELIP early light-induced protein [Vitis vinifera]
GSVIVT01002505001	1.53358	0.885347	K01749|1|8e-170|595|rcu:RCOM_1534040|hydroxymethylbilane synthase [EC:2.5.1.61]	GO:0009532//plastid stroma;GO:0005576//extracellular region	GO:0016765//transferase activity, transferring alkyl or aryl (other than methyl) groups	GO:0006952//defense response;GO:0006779//porphyrin-containing compound biosynthetic process;GO:0018065//protein-cofactor linkage	gi|296080867|emb|CBI18797.3|/0/unnamed protein product [Vitis vinifera]
GSVIVT01031783001	-1.63774	0.855916	-	-	-	-	gi|297741316|emb|CBI32447.3|/9.75941e-67/unnamed protein product [Vitis vinifera]
GSVIVT01028718001	-2.72675	0.853881	K13425|1|1e-13|71.2|rcu:RCOM_1616660|WRKY transcription factor 22;K13426|3|4e-13|74.7|vvi:100251862|WRKY transcription factor 29	-	GO:0003677//DNA binding;GO:0001071//nucleic acid binding transcription factor activity	GO:0010467//gene expression	gi|359490533|ref|XP_002267793.2|/0/PREDICTED: probable WRKY transcription factor 53-like [Vitis vinifera]
GSVIVT01008985001	-1.87188	0.857385	-	GO:0031224//intrinsic to membrane	GO:0015291//secondary active transmembrane transporter activity	GO:0015698//inorganic anion transport	gi|225459368|ref|XP_002285810.1|/0/PREDICTED: sulfate transporter 1.3 [Vitis vinifera]
GSVIVT01023878001	-2.09821	0.878136	K00924|1|3e-118|424|ath:AT4G35600|[EC:2.7.1.-];K05658|5|1e-106|385|vvi:100262734|ATP-binding cassette, subfamily B (MDR/TAP), member 1	GO:0009536//plastid	GO:0004713//protein tyrosine kinase activity;GO:0032559	GO:0006464//cellular protein modification process	gi|297744479|emb|CBI37741.3|/0/unnamed protein product [Vitis vinifera]
GSVIVT01018630001	1.10794	0.84563	-	GO:0043231//intracellular membrane-bounded organelle;GO:0016020//membrane	GO:0005488//binding	GO:0009409//response to cold;GO:0006986//response to unfolded protein;GO:0044267//cellular protein metabolic process;GO:0009408//response to heat	gi|225466097|ref|XP_002265974.1|/0/PREDICTED: uncharacterized protein LOC100246705 [Vitis vinifera]
GSVIVT01034162001	2.01577	0.90533	-	GO:0044464//cell part	-	-	gi|225440374|ref|XP_002266625.1|/6.32867e-144/PREDICTED: expansin-A4 [Vitis vinifera]
GSVIVT01011083001	5.41468	0.887834	-	-	-	-	gi|225436926|ref|XP_002275123.1|/8.79955e-179/PREDICTED: uncharacterized protein LOC100261455 [Vitis vinifera]
GSVIVT01017720001	1.58276	0.892784	K02881|1|6e-68|255|vvi:100261418|large subunit ribosomal protein L18	GO:0030529//ribonucleoprotein complex	GO:0005198//structural molecule activity	GO:0010467//gene expression	gi|189096139|pdb|3BBO|Q/8.22907e-67/Chain Q, Homology Model For The Spinach Chloroplast 50s Subunit Fitted To 9.4a Cryo-Em Map Of The 70s Chlororibosome
GSVIVT01021189001	1.36466	0.800511	-	-	-	-	gi|297740484|emb|CBI30666.3|/0/unnamed protein product [Vitis vinifera]
GSVIVT01018247001	2.12834	0.891767	K09338|1|2e-55|214|ath:AT4G16780|homeobox-leucine zipper protein	-	-	-	gi|297734590|emb|CBI16641.3|/2.65645e-125/unnamed protein product [Vitis vinifera]
GSVIVT01025823001	-1.28197	0.834079	-	-	-	-	gi|297741715|emb|CBI32847.3|/1.78207e-34/unnamed protein product [Vitis vinifera]
GSVIVT01031963001	-1.17645	0.828451	-	GO:0043231//intracellular membrane-bounded organelle	-	-	gi|359475314|ref|XP_003631650.1|/3.11652e-149/PREDICTED: BTB/POZ domain-containing protein At1g63850-like [Vitis vinifera]
GSVIVT01030407001	3.9178	0.845676	-	-	-	-	gi|147791971|emb|CAN77644.1|/4.7702e-51/hypothetical protein VITISV_042877 [Vitis vinifera]
GSVIVT01033090001	3.36289	0.871671	K10808|1|2e-61|233|vvi:100243004|ribonucleoside-diphosphate reductase subunit M2 [EC:1.17.4.1]	GO:0044424//intracellular part	GO:0046872//metal ion binding;GO:0016728	GO:0006259//DNA metabolic process;GO:0009132//nucleoside diphosphate metabolic process	gi|296082342|emb|CBI21347.3|/1.22438e-128/unnamed protein product [Vitis vinifera]
GSVIVT01015475001	-1.3536	0.840906	-	-	-	-	gi|297738902|emb|CBI28147.3|/7.56942e-92/unnamed protein product [Vitis vinifera]
GSVIVT01020809001	1.77447	0.820245	K15336|1|2e-35|149|vvi:100259391|tRNA (cytosine38-C5)-methyltransferase [EC:2.1.1.204]	GO:0009536//plastid	-	-	gi|225446761|ref|XP_002278350.1|/0/PREDICTED: pentatricopeptide repeat-containing protein At3g59040 [Vitis vinifera]
GSVIVT01012798001	1.25862	0.834644	K06685|1|9e-09|60.5|aly:ARALYDRAFT_492950|maintenance of ploidy protein MOB1 (MPS1 binder 1);K13420|2|9e-09|60.5|aly:ARALYDRAFT_356368|LRR receptor-like serine/threonine-protein kinase FLS2 [EC:2.7.11.1]	-	-	-	gi|296081026|emb|CBI18530.3|/0/unnamed protein product [Vitis vinifera]
GSVIVT01033497001	4.68181	0.841607	-	-	-	-	gi|225441451|ref|XP_002279571.1|/2.74239e-61/PREDICTED: uncharacterized protein LOC100264148 [Vitis vinifera]
GSVIVT01016719001	1.38521	0.86333	-	GO:0009526//plastid envelope;GO:0009534//chloroplast thylakoid	-	GO:0006633//fatty acid biosynthetic process;GO:0000302//response to reactive oxygen species;GO:0006779//porphyrin-containing compound biosynthetic process	gi|297742973|emb|CBI35840.3|/0/unnamed protein product [Vitis vinifera]
GSVIVT01031875001	-1.09768	0.808988	K00517|1|1e-129|461|ath:AT4G31940|[EC:1.14.-.-]	-	GO:0046872//metal ion binding	-	gi|225428620|ref|XP_002284806.1|/0/PREDICTED: cytochrome P450 82C4 [Vitis vinifera]
GSVIVT01031286001	1.14385	0.85196	K12608|1|2e-170|596|vvi:100259555|CCR4-NOT complex subunit CAF16	-	GO:0017111//nucleoside-triphosphatase activity;GO:0015604//organic phosphonate transmembrane transporter activity;GO:0032559	GO:0009207	gi|225450516|ref|XP_002281168.1|/2.41371e-169/PREDICTED: ABC transporter I family member 20 isoform 1 [Vitis vinifera]
GSVIVT01029796001	1.13771	0.823003	-	GO:0031225//anchored to membrane	GO:0005488//binding	GO:0051234//establishment of localization;GO:0010876//lipid localization	gi|225447741|ref|XP_002263068.1|/1.10055e-68/PREDICTED: non-specific lipid-transfer protein-like protein At5g64080-like [Vitis vinifera]
GSVIVT01014492001	-3.15051	0.838261	K13430|1|7e-57|220|zma:100283091|serine/threonine-protein kinase PBS1 [EC:2.7.11.1]	-	-	-	gi|302143125|emb|CBI20420.3|/0/unnamed protein product [Vitis vinifera]
GSVIVT01000048001	4.69727	0.926353	-	GO:0015630//microtubule cytoskeleton	-	GO:0000911//cytokinesis by cell plate formation;GO:0000920//cytokinetic cell separation	gi|296088324|emb|CBI36769.3|/0/unnamed protein product [Vitis vinifera]
GSVIVT01022428001	1.63866	0.875424	-	GO:0031224//intrinsic to membrane	-	GO:0051234//establishment of localization	gi|296082663|emb|CBI21668.3|/0/unnamed protein product [Vitis vinifera]
GSVIVT01014344001	-1.79441	0.841426	-	GO:0009536//plastid	-	-	gi|302143012|emb|CBI20307.3|/0/unnamed protein product [Vitis vinifera]
GSVIVT01017233001	4.61305	0.802839	-	-	-	-	gi|297743386|emb|CBI36253.3|/0/unnamed protein product [Vitis vinifera]
GSVIVT01023006001	1.52574	0.800172	-	-	-	-	gi|225448075|ref|XP_002276143.1|/1.07504e-59/PREDICTED: uncharacterized protein LOC100242881 [Vitis vinifera]
GSVIVT01035568001	-1.87976	0.903499	K07232|1|4e-49|193|osa:4335982|cation transport protein ChaC	-	-	-	gi|296081797|emb|CBI20802.3|/4.16862e-154/unnamed protein product [Vitis vinifera]
GSVIVT01029265001	-1.54755	0.838713	K13425|1|3e-26|117|rcu:RCOM_1616660|WRKY transcription factor 22;K13426|5|3e-23|107|vvi:100251862|WRKY transcription factor 29	-	-	-	gi|297735436|emb|CBI17876.3|/1.25561e-149/unnamed protein product [Vitis vinifera]
GSVIVT01032906001	3.62295	0.904901	-	-	-	-	gi|225451743|ref|XP_002280026.1|/4.10516e-58/PREDICTED: uncharacterized protein LOC100244709 isoform 1 [Vitis vinifera]
GSVIVT01011476001	1.35911	0.815724	-	GO:0031225//anchored to membrane;GO:0043231//intracellular membrane-bounded organelle	GO:0046914//transition metal ion binding	-	gi|225452918|ref|XP_002284104.1|/4.18942e-77/PREDICTED: lamin-like protein [Vitis vinifera]
GSVIVT01030035001	-2.14503	0.802704	-	-	-	-	gi|225447614|ref|XP_002273270.1|/0/PREDICTED: uncharacterized protein LOC100258038 [Vitis vinifera]
GSVIVT01031543001	-4.56287	0.857566	-	-	GO:0016787//hydrolase activity	-	gi|297734953|emb|CBI17187.3|/7.99456e-95/unnamed protein product [Vitis vinifera]
GSVIVT01033769001	1.01419	0.842104	K11187|1|2e-33|140|cre:CHLREDRAFT_196639|peroxiredoxin 5, atypical 2-Cys peroxiredoxin [EC:1.11.1.15];K03386|2|2e-33|140|ath:AT1G60740|peroxiredoxin (alkyl hydroperoxide reductase subunit C) [EC:1.11.1.15]	-	GO:0016705//oxidoreductase activity, acting on paired donors, with incorporation or reduction of molecular oxygen;GO:0016209//antioxidant activity	GO:0008152//metabolic process;GO:0019725//cellular homeostasis	gi|297740055|emb|CBI30237.3|/8.48727e-87/unnamed protein product [Vitis vinifera]
GSVIVT01001590001	2.43137	0.817804	-	GO:0044464//cell part	-	GO:0010374//stomatal complex development;GO:0048729//tissue morphogenesis;GO:0009913//epidermal cell differentiation	gi|359493068|ref|XP_003634505.1|/6.39844e-50/PREDICTED: uncharacterized protein LOC100854851 [Vitis vinifera]
GSVIVT01016495001	1.52634	0.880668	-	GO:0044436;GO:0009534//chloroplast thylakoid	GO:0005488//binding	-	gi|225449424|ref|XP_002282933.1|/1.93016e-122/PREDICTED: thylakoid lumenal 15 kDa protein 1, chloroplastic [Vitis vinifera]
GSVIVT01013929001	-4.31784	0.830508	K09286|1|4e-88|322|vvi:100254616|EREBP-like factor	-	-	GO:0006351//transcription, DNA-dependent	gi|225455041|ref|XP_002282167.1|/1.89965e-107/PREDICTED: ethylene-responsive transcription factor 5 [Vitis vinifera]
GSVIVT01032905001	1.31107	0.820222	K13289|1|4e-155|546|ath:AT2G24010|cathepsin A (carboxypeptidase C) [EC:3.4.16.5];K08249|2|5e-148|523|pop:POPTR_1084309|hydroxymandelonitrile lyase [EC:4.1.2.11]	GO:0044464//cell part	GO:0004180//carboxypeptidase activity	GO:0019538//protein metabolic process	gi|225451745|ref|XP_002280058.1|/0/PREDICTED: serine carboxypeptidase-like 25 [Vitis vinifera]
GSVIVT01019513001	2.32397	0.839165	-	GO:0030312//external encapsulating structure	GO:0004175//endopeptidase activity;GO:0005515//protein binding	GO:0008152//metabolic process;GO:0044092//negative regulation of molecular function	gi|225425996|ref|XP_002272604.1|/1.56807e-46/PREDICTED: uncharacterized protein LOC100258722 [Vitis vinifera]
GSVIVT01014388001	2.47366	0.92251	K00218|1|0.0|714|vvi:100255647|protochlorophyllide reductase [EC:1.3.1.33]	GO:0009536//plastid	GO:0016628//oxidoreductase activity, acting on the CH-CH group of donors, NAD or NADP as acceptor	GO:0006779//porphyrin-containing compound biosynthetic process	gi|359493870|ref|XP_002284769.2|/0/PREDICTED: protochlorophyllide reductase, chloroplastic-like [Vitis vinifera]
GSVIVT01035060001	-1.25167	0.869343	-	-	-	GO:0006950//response to stress	gi|225431850|ref|XP_002274535.1|/5.96474e-86/PREDICTED: major allergen Pru av 1 [Vitis vinifera]
GSVIVT01019830001	-1.55224	0.856797	-	-	GO:0019212//phosphatase inhibitor activity	GO:0007165//signal transduction;GO:0010921//regulation of phosphatase activity	gi|225426817|ref|XP_002283129.1|/4.55303e-63/PREDICTED: uncharacterized protein LOC100261582 [Vitis vinifera]
GSVIVT01035279001	-2.13299	0.907252	-	-	-	-	gi|225466279|ref|XP_002272951.1|/1.56545e-62/PREDICTED: uncharacterized protein LOC100242814 [Vitis vinifera]
GSVIVT01035718001	5.16496	0.824676	K06627|1|1e-140|498|pop:POPTR_548650|cyclin A	-	-	GO:0009987//cellular process	gi|359476069|ref|XP_002281863.2|/0/PREDICTED: cyclin-A2-2-like [Vitis vinifera]
GSVIVT01035819001	2.81667	0.857905	-	-	-	-	gi|225430224|ref|XP_002282524.1|/6.78082e-63/PREDICTED: uncharacterized RNA-binding protein C17H9.04c [Vitis vinifera]
GSVIVT01014490001	-1.62409	0.867399	K00924|1|4e-16|85.1|osa:4333912|[EC:2.7.1.-];K04733|3|7e-15|80.9|smo:SELMODRAFT_159261|interleukin-1 receptor-associated kinase 4 [EC:2.7.11.1];K13430|5|7e-15|80.9|zma:100283091|serine/threonine-protein kinase PBS1 [EC:2.7.11.1]	-	-	-	gi|302143123|emb|CBI20418.3|/0/unnamed protein product [Vitis vinifera]
GSVIVT01031460001	1.14576	0.860618	K02939|1|3e-73|273|vvi:100251697|large subunit ribosomal protein L9	GO:0000315//organellar large ribosomal subunit;GO:0009532//plastid stroma	-	GO:0010467//gene expression;GO:0022613//ribonucleoprotein complex biogenesis	gi|225436446|ref|XP_002274311.1|/3.75591e-72/PREDICTED: 50S ribosomal protein L9, chloroplastic [Vitis vinifera]
GSVIVT01036969001	4.27997	0.836724	-	-	-	-	gi|297736352|emb|CBI25075.3|/0/unnamed protein product [Vitis vinifera]
GSVIVT01019653001	1.05883	0.842059	K00517|1|1e-174|611|ath:AT1G01190|[EC:1.14.-.-];K09754|5|2e-65|248|gmx:100811080|coumaroylquinate(coumaroylshikimate) 3'-monooxygenase [EC:1.14.13.36]	-	GO:0005506//iron ion binding;GO:0004497//monooxygenase activity	-	gi|297742437|emb|CBI34586.3|/0/unnamed protein product [Vitis vinifera]
GSVIVT01014681001	3.25091	0.919865	K01177|1|5e-111|400|smo:SELMODRAFT_232533|beta-amylase [EC:3.2.1.2]	GO:0009536//plastid	GO:0016160//amylase activity;GO:0043167//ion binding	GO:0005982//starch metabolic process	gi|225461918|ref|XP_002265698.1|/0/PREDICTED: inactive beta-amylase 4, chloroplastic [Vitis vinifera]
GSVIVT01028241001	1.02526	0.840748	K00231|1|0.0|1043|vvi:100243415|oxygen-dependent protoporphyrinogen oxidase [EC:1.3.3.4]	GO:0009526//plastid envelope	GO:0016641//oxidoreductase activity, acting on the CH-NH2 group of donors, oxygen as acceptor;GO:0016634	GO:0008614//pyridoxine metabolic process;GO:0006779//porphyrin-containing compound biosynthetic process;GO:0006081//cellular aldehyde metabolic process	gi|225437762|ref|XP_002273793.1|/0/PREDICTED: protoporphyrinogen oxidase, chloroplastic [Vitis vinifera]
GSVIVT01033871001	4.51004	0.821149	K10398|1|0.0|1899|vvi:100240753|kinesin family member 11	GO:0015630//microtubule cytoskeleton	GO:0003774//motor activity;GO:0032559	GO:0007017//microtubule-based process	gi|297740135|emb|CBI30317.3|/0/unnamed protein product [Vitis vinifera]
GSVIVT01036018001	-2.68845	0.891993	K00924|1|3e-20|98.2|ath:AT5G22850|[EC:2.7.1.-]	-	GO:0004175//endopeptidase activity	GO:0019538//protein metabolic process	gi|359476195|ref|XP_002268758.2|/0/PREDICTED: aspartic proteinase nepenthesin-2-like [Vitis vinifera]
GSVIVT01024789001	1.7834	0.861205	K03147|1|0.0|1289|vvi:100250096|thiamine biosynthesis protein ThiC	GO:0009532//plastid stroma	GO:0019144//ADP-sugar diphosphatase activity;GO:0051540	GO:0006772//thiamine metabolic process;GO:0033273//response to vitamin;GO:0009581//detection of external stimulus	gi|225434668|ref|XP_002280227.1|/0/PREDICTED: phosphomethylpyrimidine synthase [Vitis vinifera]
GSVIVT01009091001	1.32555	0.845563	K11294|1|6e-19|93.2|smo:SELMODRAFT_15428|nucleolin;K13126|3|8e-14|76.3|gmx:100783163|polyadenylate-binding protein	GO:0009532//plastid stroma	GO:0003676//nucleic acid binding	-	gi|225459201|ref|XP_002285735.1|/1.47881e-138/PREDICTED: 31 kDa ribonucleoprotein, chloroplastic [Vitis vinifera]
GSVIVT01031844001	-1.12852	0.810932	-	GO:0009536//plastid	-	GO:0006952//defense response;GO:0003006//developmental process involved in reproduction	gi|225428657|ref|XP_002284884.1|/3.04176e-110/PREDICTED: uncharacterized protein LOC100267586 [Vitis vinifera]
GSVIVT01025792001	1.31489	0.838397	-	GO:0009523//photosystem II;GO:0009532//plastid stroma;GO:0009534//chloroplast thylakoid	GO:0046872//metal ion binding	GO:0044237//cellular metabolic process	gi|225440155|ref|XP_002283307.1|/5.40481e-141/PREDICTED: psbP domain-containing protein 6, chloroplastic [Vitis vinifera]
GSVIVT01018654001	-1.64825	0.891812	K13993|1|2e-35|148|vvi:100248906|HSP20 family protein	-	-	GO:0006950//response to stress;GO:0010038//response to metal ion	gi|225466111|ref|XP_002267332.1|/1.53009e-65/PREDICTED: 23.6 kDa heat shock protein, mitochondrial isoform 1 [Vitis vinifera]
GSVIVT01028226001	1.27223	0.871762	K03768|1|1e-94|345|rcu:RCOM_1342590|peptidyl-prolyl cis-trans isomerase B (cyclophilin B) [EC:5.2.1.8]	-	GO:0016859//cis-trans isomerase activity	GO:0044267//cellular protein metabolic process	gi|359480225|ref|XP_002273421.2|/1.05848e-137/PREDICTED: peptidyl-prolyl cis-trans isomerase CYP20-3, chloroplastic-like isoform 1 [Vitis vinifera]
GSVIVT01008820001	-1.06093	0.828586	K15015|1|3e-16|85.9|aly:ARALYDRAFT_486994|solute carrier family 32 (vesicular inhibitory amino acid transporter)	GO:0031224//intrinsic to membrane	-	-	gi|359492379|ref|XP_003634405.1|/0/PREDICTED: amino acid permease 2 [Vitis vinifera]
GSVIVT01011034001	4.86466	0.953253	K11251|1|9e-61|231|vvi:100254490|histone H2A	GO:0000785//chromatin;GO:0043231//intracellular membrane-bounded organelle	GO:0003676//nucleic acid binding	GO:0034728//nucleosome organization	gi|225436843|ref|XP_002271506.1|/1.04928e-59/PREDICTED: histone H2AX [Vitis vinifera]
GSVIVT01032545001	1.64928	0.856074	K07761|1|7e-53|207|ath:AT1G59970|gelatinase A [EC:3.4.24.24]	GO:0044421//extracellular region part	GO:0046914//transition metal ion binding;GO:0004175//endopeptidase activity	GO:0019538//protein metabolic process	gi|225452580|ref|XP_002280833.1|/5.0692e-159/PREDICTED: metalloendoproteinase 1 [Vitis vinifera]
GSVIVT01016518001	2.8678	0.874429	K03364|1|0.0|635|zma:100193750|cell division cycle 20-like protein 1, cofactor of APC complex	GO:0031234//extrinsic to internal side of plasma membrane;GO:0009536//plastid	-	GO:0023052//signaling	gi|225449464|ref|XP_002283264.1|/0/PREDICTED: protein FIZZY-RELATED 3 [Vitis vinifera]
GSVIVT01009359001	-2.96876	0.921154	-	-	-	-	gi|302142211|emb|CBI19414.3|/3.27599e-66/unnamed protein product [Vitis vinifera]
GSVIVT01000015001	-1.42269	0.872304	K05283|1|1e-13|76.3|aly:ARALYDRAFT_354960|phosphatidylinositol glycan, class W [EC:2.3.-.-];K11982|2|2e-09|62.0|ppp:PHYPADRAFT_169900|E3 ubiquitin-protein ligase RNF115/126 [EC:6.3.2.19];K15692|4|1e-08|59.3|ppp:PHYPADRAFT_16563|E3 ubiquitin-protein ligase RNF13 [EC:6.3.2.19]	-	GO:0046872//metal ion binding	-	gi|296088297|emb|CBI36742.3|/0/unnamed protein product [Vitis vinifera]
GSVIVT01026444001	-1.26077	0.821647	K00021|1|0.0|1031|vvi:100243051|hydroxymethylglutaryl-CoA reductase (NADPH) [EC:1.1.1.34]	GO:0031224//intrinsic to membrane	GO:0016616//oxidoreductase activity, acting on the CH-OH group of donors, NAD or NADP as acceptor;GO:0048037//cofactor binding;GO:0000166//nucleotide binding	GO:0006720//isoprenoid metabolic process;GO:0006732//coenzyme metabolic process	gi|296088511|emb|CBI37502.3|/0/unnamed protein product [Vitis vinifera]
GSVIVT01024545001	1.06874	0.800647	K13415|1|8e-54|210|aly:ARALYDRAFT_912402|protein brassinosteroid insensitive 1 [EC:2.7.10.1 2.7.11.1]	GO:0016020//membrane	GO:0016491//oxidoreductase activity;GO:0004672//protein kinase activity;GO:0000166//nucleotide binding	GO:0008152//metabolic process	gi|297745748|emb|CBI15804.3|/0/unnamed protein product [Vitis vinifera]
GSVIVT01036062001	-3.04745	0.922442	K12581|1|1e-33|140|vvi:100255985|CCR4-NOT transcription complex subunit 7/8	GO:0043231//intracellular membrane-bounded organelle	GO:0000175//3'-5'-exoribonuclease activity;GO:0005488//binding	GO:0006950//response to stress;GO:0016070//RNA metabolic process	gi|225464848|ref|XP_002271636.1|/2.48604e-61/PREDICTED: probable CCR4-associated factor 1 homolog 9-like [Vitis vinifera]
GSVIVT01013918001	-3.62818	0.921402	K09286|1|5e-105|378|vvi:100244353|EREBP-like factor	-	-	-	gi|297745009|emb|CBI38601.3|/4.33446e-110/unnamed protein product [Vitis vinifera]
GSVIVT01007817001	3.85686	0.854198	-	-	-	-	gi|297733836|emb|CBI15083.3|/1.44179e-53/unnamed protein product [Vitis vinifera]
GSVIVT01035109001	-2.50789	0.849858	-	-	GO:0046872//metal ion binding	GO:0009743//response to carbohydrate stimulus;GO:0006950//response to stress	gi|296083332|emb|CBI22968.3|/1.09338e-44/unnamed protein product [Vitis vinifera]
GSVIVT01025697001	1.61807	0.899634	K11294|1|5e-32|137|smo:SELMODRAFT_15428|nucleolin;K12741|4|2e-16|85.9|sbi:SORBI_04g007860|heterogeneous nuclear ribonucleoprotein A1/A3	GO:0009532//plastid stroma;GO:0009526//plastid envelope;GO:0009534//chloroplast thylakoid	GO:0008187//poly-pyrimidine tract binding	GO:0006952//defense response;GO:0009725//response to hormone stimulus	gi|225440003|ref|XP_002281642.1|/1.26907e-100/PREDICTED: 31 kDa ribonucleoprotein, chloroplastic isoform 1 [Vitis vinifera]
GSVIVT01005030001	-4.56682	0.911456	K06892|1|7e-70|262|pop:POPTR_550478|;K05277|3|2e-49|194|gmx:547615|leucoanthocyanidin dioxygenase [EC:1.14.11.19];K05278|4|2e-49|194|gmx:100816829|flavonol synthase [EC:1.14.11.23]	-	GO:0046914//transition metal ion binding;GO:0016706//oxidoreductase activity, acting on paired donors, with incorporation or reduction of molecular oxygen, 2-oxoglutarate as one donor, and incorporation of one atom each of oxygen into both donors;GO:0016701//oxidoreductase activity, acting on single donors with incorporation of molecular oxygen	GO:0051553	gi|225448882|ref|XP_002270667.1|/0/PREDICTED: probable 2-oxoglutarate/Fe(II)-dependent dioxygenase [Vitis vinifera]
GSVIVT01027084001	1.51044	0.839618	K13179|1|2e-68|259|gmx:100798885|ATP-dependent RNA helicase DDX18/HAS1 [EC:3.6.4.13]	GO:0044464//cell part	GO:0032559;GO:0042623//ATPase activity, coupled	-	gi|297745425|emb|CBI40505.3|/0/unnamed protein product [Vitis vinifera]
GSVIVT01010325001	4.64024	0.925087	K02537|1|3e-115|412|vvi:100254488|mitotic spindle assembly checkpoint protein MAD2	GO:0043231//intracellular membrane-bounded organelle;GO:0000775//chromosome, centromeric region	GO:0003676//nucleic acid binding	GO:0045841//negative regulation of mitotic metaphase/anaphase transition;GO:0048229//gametophyte development;GO:0003006//developmental process involved in reproduction	gi|225425890|ref|XP_002270903.1|/4.33273e-114/PREDICTED: mitotic spindle checkpoint protein MAD2 isoform 1 [Vitis vinifera]
GSVIVT01009497001	4.02285	0.8596	-	-	-	-	gi|302142319|emb|CBI19522.3|/0/unnamed protein product [Vitis vinifera]
GSVIVT01033033001	1.4928	0.88277	-	-	GO:0008081//phosphoric diester hydrolase activity	GO:0019400	gi|296082305|emb|CBI21310.3|/0/unnamed protein product [Vitis vinifera]
GSVIVT01037851001	-2.04241	0.819838	-	-	-	-	gi|296083062|emb|CBI22466.3|/5.10854e-92/unnamed protein product [Vitis vinifera]
GSVIVT01016697001	-1.47247	0.852389	K13993|1|1e-25|115|rcu:RCOM_0706490|HSP20 family protein	-	-	GO:0000302//response to reactive oxygen species;GO:0009642//response to light intensity	gi|147782666|emb|CAN61792.1|/1.06744e-107/hypothetical protein VITISV_015797 [Vitis vinifera]
GSVIVT01020389001	-9.50494	0.850468	-	-	GO:0003676//nucleic acid binding	-	gi|296082751|emb|CBI21756.3|/3.82308e-168/unnamed protein product [Vitis vinifera]
GSVIVT01023085001	-1.10741	0.843732	-	-	GO:0016757//transferase activity, transferring glycosyl groups	-	gi|225447903|ref|XP_002263888.1|/1.13342e-49/PREDICTED: UDP-glucose flavonoid 3-O-glucosyltransferase 6 isoform 2 [Vitis vinifera]
GSVIVT01028062001	1.81513	0.835368	K10406|1|3e-95|348|vvi:100249019|kinesin family member C2/C3	GO:0015630//microtubule cytoskeleton	GO:0003774//motor activity;GO:0032559	GO:0007017//microtubule-based process	gi|297743934|emb|CBI36904.3|/0/unnamed protein product [Vitis vinifera]
GSVIVT01017808001	-1.25917	0.871762	K01177|1|2e-88|324|aly:ARALYDRAFT_479940|beta-amylase [EC:3.2.1.2]	-	GO:0043167//ion binding;GO:0016160//amylase activity	GO:0005976//polysaccharide metabolic process	gi|297736915|emb|CBI26116.3|/0/unnamed protein product [Vitis vinifera]
GSVIVT01031698001	2.02132	0.837741	K14489|1|4e-15|81.6|vvi:100263145|arabidopsis histidine kinase 2/3/4 (cytokinin receptor) [EC:2.7.13.3]	GO:0005618//cell wall	GO:0043167//ion binding;GO:0008422//beta-glucosidase activity	GO:0044238//primary metabolic process	gi|359478001|ref|XP_003632052.1|/0/PREDICTED: probable glucan endo-1,3-beta-glucosidase A6-like [Vitis vinifera]
GSVIVT01016701001	-1.78136	0.871897	-	-	-	-	gi|359482333|ref|XP_003632757.1|/3.8058e-67/PREDICTED: auxin-repressed 12.5 kDa protein-like [Vitis vinifera]
GSVIVT01035314001	-3.57399	0.839685	K00924|1|2e-125|447|ath:AT5G25930|[EC:2.7.1.-]	-	GO:0016301//kinase activity	-	gi|296081584|emb|CBI20589.3|/0/unnamed protein product [Vitis vinifera]
GSVIVT01004944001	1.0579	0.84875	-	-	-	-	gi|225425246|ref|XP_002269300.1|/9.71446e-77/PREDICTED: light-regulated protein [Vitis vinifera]
GSVIVT01020788001	1.37815	0.848117	K02433|1|0.0|1006|vvi:100247231|aspartyl-tRNA(Asn)/glutamyl-tRNA (Gln) amidotransferase subunit A [EC:6.3.5.6 6.3.5.7]	GO:0009532//plastid stroma	GO:0016884//carbon-nitrogen ligase activity, with glutamine as amido-N-donor;GO:0016787//hydrolase activity	GO:0010467//gene expression	gi|353558711|sp|E0CTY1.1|GATA_VITVI/0/RecName: Full=Glutamyl-tRNA(Gln) amidotransferase subunit A, chloroplastic/mitochondrial; Short=Glu-AdT subunit A; Flags: Precursor
GSVIVT01030418001	1.02722	0.817419	-	GO:0031225//anchored to membrane	-	-	gi|225446995|ref|XP_002266937.1|/4.08843e-101/PREDICTED: fasciclin-like arabinogalactan protein 7 isoform 2 [Vitis vinifera]
GSVIVT01038719001	-2.90732	0.810367	-	-	-	-	gi|225455082|ref|XP_002267631.1|/5.57584e-172/PREDICTED: uncharacterized protein LOC100245317 [Vitis vinifera]
GSVIVT01016848001	1.13532	0.800963	K11145|1|2e-121|434|vvi:100242891|ribonuclease III family protein [EC:3.1.26.-]	-	GO:0003676//nucleic acid binding;GO:0016891//endoribonuclease activity, producing 5'-phosphomonoesters	GO:0010467//gene expression	gi|225442262|ref|XP_002279256.1|/2.03799e-120/PREDICTED: uncharacterized protein LOC100242891 [Vitis vinifera]
GSVIVT01016700001	-2.08698	0.873909	K09527|1|3e-13|75.1|gmx:100781496|DnaJ homolog subfamily C member 7;K09523|3|1e-12|73.2|bdi:100820991|DnaJ homolog subfamily C member 3;K09510|4|2e-12|72.4|olu:OSTLU_26706|DnaJ homolog subfamily B member 4	-	GO:0005515//protein binding	GO:0044267//cellular protein metabolic process;GO:0050896//response to stimulus	gi|297742954|emb|CBI35821.3|/3.92878e-104/unnamed protein product [Vitis vinifera]
GSVIVT01025160001	-3.49584	0.81274	K08472|1|1e-152|538|aly:ARALYDRAFT_665253|mlo protein	GO:0016020//membrane	-	GO:0009987//cellular process;GO:0006950//response to stress	gi|225435265|ref|XP_002282198.1|/0/PREDICTED: MLO12 protein [Vitis vinifera]
GSVIVT01015979001	1.14078	0.837719	-	GO:0031410//cytoplasmic vesicle	GO:0046914//transition metal ion binding	-	gi|225443154|ref|XP_002263869.1|/1.50083e-64/PREDICTED: lamin-like protein [Vitis vinifera]
GSVIVT01016304001	-4.89381	0.921583	K08472|1|2e-170|597|aly:ARALYDRAFT_315221|mlo protein	GO:0031224//intrinsic to membrane	-	GO:0050832//defense response to fungus;GO:0009987//cellular process	gi|359486684|ref|XP_002274642.2|/0/PREDICTED: MLO7 protein [Vitis vinifera]
GSVIVT01029167001	-1.30691	0.83634	K14504|1|2e-121|380|rcu:RCOM_1630040|xyloglucan:xyloglucosyl transferase TCH4 [EC:2.4.1.207];K08235|3|5e-121|375|vvi:100252949|xyloglucan:xyloglucosyl transferase [EC:2.4.1.207]	GO:0005576//extracellular region;GO:0030312//external encapsulating structure	GO:0016798//hydrolase activity, acting on glycosyl bonds;GO:0016758//transferase activity, transferring hexosyl groups	GO:0044042//glucan metabolic process	gi|225446109|ref|XP_002274404.1|/3.55016e-147/PREDICTED: probable xyloglucan endotransglucosylase/hydrolase protein 23 [Vitis vinifera]
GSVIVT01029226001	6.00528	0.848433	K13289|1|2e-116|417|mtr:MTR_4g021500|cathepsin A (carboxypeptidase C) [EC:3.4.16.5];K09756|5|2e-113|408|ath:AT5G09640|serine carboxypeptidase-like 19 [EC:3.4.16.- 2.3.1.91]	-	GO:0004180//carboxypeptidase activity	GO:0019538//protein metabolic process	gi|297735408|emb|CBI17848.3|/0/unnamed protein product [Vitis vinifera]
GSVIVT01024725001	3.36516	0.896831	K10257|1|0.0|835|vvi:100243349|omega-3 fatty acid desaturase (delta-15 desaturase) [EC:1.14.19.-]	-	GO:0016705//oxidoreductase activity, acting on paired donors, with incorporation or reduction of molecular oxygen	GO:0044238//primary metabolic process	gi|225434566|ref|XP_002277573.1|/0/PREDICTED: temperature-sensitive omega-3 fatty acid desaturase, chloroplastic-like [Vitis vinifera]
GSVIVT01023978001	3.78667	0.837583	K05868|1|0.0|680|vvi:100262390|cyclin B	-	-	GO:0007049//cell cycle	gi|297744569|emb|CBI37831.3|/0/unnamed protein product [Vitis vinifera]
GSVIVT01004634001	-1.61437	0.896582	K05907|1|3e-75|279|ath:AT4G04610|adenylyl-sulfate reductase (glutathione) [EC:1.8.4.9]	-	GO:0016671//oxidoreductase activity, acting on a sulfur group of donors, disulfide as acceptor	GO:0006790//sulfur compound metabolic process;GO:0019725//cellular homeostasis	gi|296084773|emb|CBI14796.3|/6.20358e-118/unnamed protein product [Vitis vinifera]
GSVIVT01011715001	1.02426	0.813441	K05929|1|0.0|803|vvi:100254279|phosphoethanolamine N-methyltransferase [EC:2.1.1.103]	-	GO:0008170//N-methyltransferase activity	GO:0006730//one-carbon metabolic process;GO:0046470//phosphatidylcholine metabolic process	gi|225424279|ref|XP_002284594.1|/0/PREDICTED: phosphoethanolamine N-methyltransferase 3-like [Vitis vinifera]
GSVIVT01014084001	6.28591	0.854899	K03453|1|9e-92|333|vvi:100257142|bile acid:Na+ symporter, BASS family	GO:0009536//plastid	GO:0005343//organic acid:sodium symporter activity	GO:0030001//metal ion transport	gi|302142805|emb|CBI20100.3|/6.05567e-96/unnamed protein product [Vitis vinifera]
GSVIVT01028261001	1.80335	0.898752	-	-	-	-	gi|297744096|emb|CBI37066.3|/9.61263e-36/unnamed protein product [Vitis vinifera]
GSVIVT01025408001	1.86485	0.854288	-	-	GO:0005488//binding	GO:0051234//establishment of localization;GO:0010876//lipid localization	gi|225435694|ref|XP_002283442.1|/1.6068e-65/PREDICTED: non-specific lipid-transfer protein-like protein At2g13820-like [Vitis vinifera]
GSVIVT01033305001	-1.2315	0.852841	K06617|1|0.0|1539|vvi:100248608|raffinose synthase [EC:2.4.1.82]	-	-	GO:0009628//response to abiotic stimulus	gi|297739679|emb|CBI29861.3|/0/unnamed protein product [Vitis vinifera]
GSVIVT01021831001	1.91842	0.816877	K08857|1|0.0|1098|vvi:100241803|NIMA (never in mitosis gene a)-related kinase [EC:2.7.11.1]	-	GO:0004674//protein serine/threonine kinase activity;GO:0000166//nucleotide binding	-	gi|298204885|emb|CBI34192.3|/0/unnamed protein product [Vitis vinifera]
GSVIVT01013913001	-3.83371	0.927076	K09286|1|4e-115|412|vvi:100254616|EREBP-like factor	GO:0043231//intracellular membrane-bounded organelle	GO:0003676//nucleic acid binding;GO:0001071//nucleic acid binding transcription factor activity	GO:0006351//transcription, DNA-dependent	gi|225455022|ref|XP_002281813.1|/3.60765e-131/PREDICTED: ethylene-responsive transcription factor 5 [Vitis vinifera]
GSVIVT01017948001	1.82891	0.864641	K00797|1|0.0|674|vvi:100258046|spermidine synthase [EC:2.5.1.16]	-	GO:0016765//transferase activity, transferring alkyl or aryl (other than methyl) groups	GO:0006596//polyamine biosynthetic process	gi|225432624|ref|XP_002281882.1|/0/PREDICTED: thermospermine synthase ACAULIS5 [Vitis vinifera]
GSVIVT01027006001	1.21803	0.867738	K02931|1|5e-149|525|vvi:100251632|large subunit ribosomal protein L5	GO:0009526//plastid envelope;GO:0009532//plastid stroma;GO:0015934//large ribosomal subunit	GO:0005198//structural molecule activity	GO:0010467//gene expression	gi|225454373|ref|XP_002278820.1|/6.86178e-148/PREDICTED: 50S ribosomal protein L5, chloroplastic [Vitis vinifera]
GSVIVT01005286001	-4.00375	0.902166	-	GO:0031410//cytoplasmic vesicle	-	GO:0009628//response to abiotic stimulus	gi|359494772|ref|XP_002264674.2|/1.13936e-142/PREDICTED: cysteine-rich repeat secretory protein 55-like [Vitis vinifera]
GSVIVT01019892001	3.09276	0.926082	K05277|1|6e-94|342|vvi:100233142|leucoanthocyanidin dioxygenase [EC:1.14.11.19]	-	GO:0016706//oxidoreductase activity, acting on paired donors, with incorporation or reduction of molecular oxygen, 2-oxoglutarate as one donor, and incorporation of one atom each of oxygen into both donors;GO:0019842//vitamin binding;GO:0043169//cation binding;GO:0016701//oxidoreductase activity, acting on single donors with incorporation of molecular oxygen	GO:0009699//phenylpropanoid biosynthetic process	gi|297742628|emb|CBI34777.3|/4.56787e-111/unnamed protein product [Vitis vinifera]
GSVIVT01012682001	-1.58663	0.845156	K13424|1|1e-20|100|osa:4327518|WRKY transcription factor 33	-	-	-	gi|302144104|emb|CBI23209.3|/0/unnamed protein product [Vitis vinifera]
GSVIVT01020595001	4.38922	0.920679	-	GO:0043231//intracellular membrane-bounded organelle	-	-	gi|359485406|ref|XP_002275156.2|/7.16424e-152/PREDICTED: reticulon-like protein B17-like [Vitis vinifera]
GSVIVT01024221001	2.85458	0.838239	K12309|1|0.0|937|ath:AT3G52840|beta-galactosidase [EC:3.2.1.23];K01190|3|2e-65|249|cme:CMP078C|beta-galactosidase [EC:3.2.1.23]	-	GO:0030246//carbohydrate binding;GO:0015925;GO:0043167//ion binding	GO:0044238//primary metabolic process	gi|359474925|ref|XP_002263382.2|/0/PREDICTED: beta-galactosidase 3-like [Vitis vinifera]
GSVIVT01007880001	-1.54579	0.871287	K03695|1|0.0|1333|bdi:100825913|ATP-dependent Clp protease ATP-binding subunit ClpB	-	GO:0017111//nucleoside-triphosphatase activity;GO:0032559	GO:0009642//response to light intensity;GO:0044267//cellular protein metabolic process;GO:0000302//response to reactive oxygen species	gi|297733886|emb|CBI15133.3|/0/unnamed protein product [Vitis vinifera]
GSVIVT01000423001	-2.51956	0.876848	K02183|1|6e-08|55.8|ppp:PHYPADRAFT_180168|calmodulin	-	GO:0046872//metal ion binding	-	gi|296081238|emb|CBI17982.3|/2.32113e-127/unnamed protein product [Vitis vinifera]
GSVIVT01013149001	-1.14549	0.859284	-	-	-	-	gi|225427189|ref|XP_002277964.1|/1.23643e-132/PREDICTED: uncharacterized protein LOC100250554 [Vitis vinifera]
GSVIVT01008879001	1.86757	0.82992	-	-	-	GO:0050896//response to stimulus	gi|225459542|ref|XP_002285849.1|/6.24738e-125/PREDICTED: uncharacterized protein LOC100248801 [Vitis vinifera]
GSVIVT01001270001	1.72414	0.881731	K00423|1|5e-145|513|ath:AT1G55570|L-ascorbate oxidase [EC:1.10.3.3]	GO:0005618//cell wall;GO:0031225//anchored to membrane;GO:0031090//organelle membrane;GO:0005576//extracellular region	GO:0046914//transition metal ion binding;GO:0016682//oxidoreductase activity, acting on diphenols and related substances as donors, oxygen as acceptor	GO:0009826//unidimensional cell growth;GO:0008152//metabolic process	gi|225426946|ref|XP_002266352.1|/0/PREDICTED: monocopper oxidase-like protein SKU5 [Vitis vinifera]
GSVIVT01019729001	-1.97841	0.882477	K09874|1|5e-123|439|aly:ARALYDRAFT_911337|aquaporin NIP	GO:0044459//plasma membrane part;GO:0031224//intrinsic to membrane	GO:0015563;GO:0005372//water transmembrane transporter activity;GO:0015103//inorganic anion transmembrane transporter activity	GO:0015698//inorganic anion transport;GO:0010036//response to boron-containing substance	gi|225426464|ref|XP_002276319.1|/3.33439e-144/PREDICTED: probable aquaporin NIP5-1 [Vitis vinifera]
GSVIVT01024443001	10.2428	0.908156	-	-	-	-	gi|359489997|ref|XP_002274897.2|/2.54599e-77/PREDICTED: uncharacterized protein LOC100259588 [Vitis vinifera]
GSVIVT01030206001	-1.26099	0.859261	K00924|1|3e-81|300|ath:AT1G30270|[EC:2.7.1.-];K07198|4|8e-49|192|ppp:PHYPADRAFT_228852|5'-AMP-activated protein kinase, catalytic alpha subunit [EC:2.7.11.11]	-	GO:0004674//protein serine/threonine kinase activity;GO:0000166//nucleotide binding	GO:0009987//cellular process	gi|297735561|emb|CBI18055.3|/0/unnamed protein product [Vitis vinifera]
GSVIVT01008589001	1.03155	0.848773	K01845|1|0.0|759|vvi:100250737|glutamate-1-semialdehyde 2,1-aminomutase [EC:5.4.3.8]	GO:0009526//plastid envelope;GO:0009532//plastid stroma;GO:0005576//extracellular region	GO:0016869//intramolecular transferase activity, transferring amino groups;GO:0016769//transferase activity, transferring nitrogenous groups;GO:0048037//cofactor binding	GO:0009314//response to radiation;GO:0006779//porphyrin-containing compound biosynthetic process	gi|297734461|emb|CBI15708.3|/0/unnamed protein product [Vitis vinifera]
GSVIVT01003969001	3.31044	0.84545	-	-	-	-	gi|296081318|emb|CBI17700.3|/0/unnamed protein product [Vitis vinifera]
GSVIVT01021425001	1.7131	0.879809	K09458|1|0.0|820|vvi:100258842|3-oxoacyl-[acyl-carrier-protein] synthase II [EC:2.3.1.179]	-	GO:0004312//fatty acid synthase activity	GO:0006631//fatty acid metabolic process	gi|359483854|ref|XP_002272874.2|/0/PREDICTED: 3-oxoacyl-[acyl-carrier-protein] synthase I, chloroplastic-like [Vitis vinifera]
GSVIVT01011473001	1.96175	0.820471	-	-	-	GO:0000917//barrier septum assembly	gi|359488951|ref|XP_002278852.2|/8.91261e-134/PREDICTED: cell division topological specificity factor homolog, chloroplastic-like [Vitis vinifera]
GSVIVT01025339001	3.10946	0.90967	K00454|1|0.0|1767|vvi:100243312|lipoxygenase [EC:1.13.11.12]	-	GO:0046914//transition metal ion binding;GO:0016702//oxidoreductase activity, acting on single donors with incorporation of molecular oxygen, incorporation of two atoms of oxygen	GO:0006633//fatty acid biosynthetic process	gi|225435556|ref|XP_002285574.1|/0/PREDICTED: linoleate 13S-lipoxygenase 2-1, chloroplastic [Vitis vinifera]
GSVIVT01011668001	-1.20631	0.815408	-	-	GO:0016462//pyrophosphatase activity	-	gi|225424364|ref|XP_002284976.1|/1.21153e-85/PREDICTED: nudix hydrolase 18, mitochondrial [Vitis vinifera]
GSVIVT01026323001	-2.06909	0.907591	K03320|1|3e-72|270|vvi:100256949|ammonium transporter, Amt family	GO:0016020//membrane	-	GO:0006810//transport	gi|296088260|emb|CBI35768.3|/2.90493e-80/unnamed protein product [Vitis vinifera]
GSVIVT01017734001	3.90792	0.869479	K11592|1|3e-48|190|smo:SELMODRAFT_448444|endoribonuclease Dicer [EC:3.1.26.-]	-	-	-	gi|359477401|ref|XP_003631973.1|/9.28438e-164/PREDICTED: protein FAM179B-like [Vitis vinifera]
GSVIVT01012207001	1.20243	0.826009	K06630|1|3e-144|509|vvi:100254211|tyrosine 3-monooxygenase/tryptophan 5-monooxygenase activation protein	-	GO:0005515//protein binding	-	gi|225423491|ref|XP_002269100.1|/3.76804e-143/PREDICTED: 14-3-3-like protein GF14 iota-like [Vitis vinifera]
GSVIVT01019568001	-1.03219	0.816538	K10999|1|5e-111|400|sbi:SORBI_02g025020|cellulose synthase A [EC:2.4.1.12]	GO:0031224//intrinsic to membrane	GO:0016759//cellulose synthase activity	GO:0045229//external encapsulating structure organization;GO:0009250//glucan biosynthetic process	gi|225426276|ref|XP_002265126.1|/0/PREDICTED: cellulose synthase-like protein G3 [Vitis vinifera]
GSVIVT01027850001	4.23466	0.819499	K10398|1|2e-31|135|ota:Ot04g00540|kinesin family member 11	GO:0044444//cytoplasmic part	GO:0003774//motor activity;GO:0000166//nucleotide binding	-	gi|296083682|emb|CBI23671.3|/0/unnamed protein product [Vitis vinifera]
GSVIVT01009376001	2.07787	0.888535	K00360|1|1e-12|71.2|ppp:PHYPADRAFT_184973|nitrate reductase (NADH) [EC:1.7.1.1];K13076|4|4e-10|62.4|zma:100279397|delta8-fatty-acid desaturase [EC:1.14.19.4]	-	GO:0005506//iron ion binding	GO:0006952//defense response	gi|225458786|ref|XP_002285164.1|/1.5953e-79/PREDICTED: cytochrome b5 [Vitis vinifera]
GSVIVT01017032001	2.84247	0.917876	K04077|1|0.0|913|bdi:100842360|chaperonin GroEL	GO:0005840//ribosome;GO:0031981//nuclear lumen;GO:0009532//plastid stroma;GO:0009526//plastid envelope;GO:0005576//extracellular region;GO:0016020//membrane	GO:0005515//protein binding;GO:0032559	GO:0051084//'de novo' posttranslational protein folding;GO:0009814//defense response, incompatible interaction	gi|225442531|ref|XP_002284134.1|/0/PREDICTED: ruBisCO large subunit-binding protein subunit beta, chloroplastic [Vitis vinifera]
GSVIVT01012889001	5.00312	0.905941	-	-	-	-	gi|296084574|emb|CBI25595.3|/0/unnamed protein product [Vitis vinifera]
GSVIVT01024524001	1.11797	0.855509	K11266|1|4e-06|50.1|vvi:100253529|MAternally affected uncoordination	-	-	-	gi|297745731|emb|CBI15787.3|/3.43391e-100/unnamed protein product [Vitis vinifera]
GSVIVT01016784001	1.23739	0.836656	K00679|1|0.0|1359|vvi:100256634|phospholipid:diacylglycerol acyltransferase [EC:2.3.1.158]	-	GO:0008080//N-acetyltransferase activity;GO:0008374//O-acyltransferase activity	GO:0044238//primary metabolic process	gi|225442172|ref|XP_002275795.1|/0/PREDICTED: phospholipid:diacylglycerol acyltransferase 1 [Vitis vinifera]
GSVIVT01008910001	3.38442	0.871332	K05278|1|1e-103|373|vvi:100232938|flavonol synthase [EC:1.14.11.23]	GO:0044424//intracellular part	GO:0043169//cation binding;GO:0019842//vitamin binding;GO:0016706//oxidoreductase activity, acting on paired donors, with incorporation or reduction of molecular oxygen, 2-oxoglutarate as one donor, and incorporation of one atom each of oxygen into both donors;GO:0016701//oxidoreductase activity, acting on single donors with incorporation of molecular oxygen	GO:0051553	gi|225459493|ref|XP_002285839.1|/1.11127e-102/PREDICTED: flavonol synthase/flavanone 3-hydroxylase [Vitis vinifera]
GSVIVT01037542001	2.0376	0.855893	K01188|1|7e-157|552|vvi:100255282|beta-glucosidase [EC:3.2.1.21]	-	GO:0015926//glucosidase activity	GO:0044238//primary metabolic process	gi|296084024|emb|CBI24412.3|/0/unnamed protein product [Vitis vinifera]
GSVIVT01030264001	1.36485	0.847846	-	GO:0031224//intrinsic to membrane;GO:0043231//intracellular membrane-bounded organelle	-	GO:0051234//establishment of localization	gi|297735603|emb|CBI18097.3|/0/unnamed protein product [Vitis vinifera]
GSVIVT01019689001	1.08296	0.853226	K02867|1|3e-93|340|vvi:100263279|large subunit ribosomal protein L11	GO:0009526//plastid envelope;GO:0009532//plastid stroma;GO:0015934//large ribosomal subunit	GO:0005198//structural molecule activity	GO:0010467//gene expression;GO:0022613//ribonucleoprotein complex biogenesis	gi|225426522|ref|XP_002278388.1|/3.60266e-92/PREDICTED: 50S ribosomal protein L11, chloroplastic-like [Vitis vinifera]
GSVIVT01007286001	4.27434	0.909512	-	-	-	-	gi|359496998|ref|XP_002274293.2|/5.22746e-64/PREDICTED: pistil-specific extensin-like protein-like [Vitis vinifera]
GSVIVT01027175001	1.3752	0.844139	-	GO:0016020//membrane;GO:0043231//intracellular membrane-bounded organelle	-	-	gi|225470942|ref|XP_002264247.1|/0/PREDICTED: nephrocystin-3 [Vitis vinifera]
GSVIVT01031547001	3.93147	0.922329	K06688|1|2e-100|363|vvi:100249922|ubiquitin-conjugating enzyme E2 C [EC:6.3.2.19]	GO:0043231//intracellular membrane-bounded organelle	GO:0019787//small conjugating protein ligase activity;GO:0032559	GO:0019941//modification-dependent protein catabolic process;GO:0032446//protein modification by small protein conjugation	gi|225436569|ref|XP_002278564.1|/1.90406e-99/PREDICTED: ubiquitin-conjugating enzyme E2 19 [Vitis vinifera]
GSVIVT01035061001	-2.0058	0.907229	-	-	-	GO:0006950//response to stress	gi|169626710|gb|ACA58119.1|/1.19935e-85/pathogenesis-related protein 10.3 [Vitis vinifera]
GSVIVT01008491001	1.1276	0.821918	K00059|1|3e-162|570|vvi:100254351|3-oxoacyl-[acyl-carrier protein] reductase [EC:1.1.1.100]	GO:0009536//plastid	GO:0004312//fatty acid synthase activity;GO:0000166//nucleotide binding	GO:0006631//fatty acid metabolic process	gi|225456248|ref|XP_002279380.1|/3.90106e-161/PREDICTED: 3-oxoacyl-[acyl-carrier-protein] reductase 1, chloroplastic [Vitis vinifera]
GSVIVT01011146001	-1.05938	0.846761	-	GO:0043231//intracellular membrane-bounded organelle	GO:0003677//DNA binding;GO:0001071//nucleic acid binding transcription factor activity	GO:0006351//transcription, DNA-dependent	gi|296083149|emb|CBI22785.3|/0/unnamed protein product [Vitis vinifera]
GSVIVT01025349001	-1.4027	0.843867	K13416|1|2e-11|69.7|ath:AT4G33430|brassinosteroid insensitive 1-associated receptor kinase 1 [EC:2.7.10.1 2.7.11.1];K13418|3|9e-11|67.8|aly:ARALYDRAFT_895025|somatic embryogenesis receptor kinase 1 [EC:2.7.10.1 2.7.11.1];K04733|4|9e-11|67.8|aly:ARALYDRAFT_916421|interleukin-1 receptor-associated kinase 4 [EC:2.7.11.1]	-	GO:0004672//protein kinase activity;GO:0000166//nucleotide binding	-	gi|297746390|emb|CBI16446.3|/0/unnamed protein product [Vitis vinifera]
GSVIVT01013151001	-1.43044	0.848094	-	-	-	-	gi|225427193|ref|XP_002279643.1|/3.96045e-79/PREDICTED: uncharacterized protein LOC100255790 [Vitis vinifera]
GSVIVT01031123001	4.03743	0.935124	K11251|1|1e-37|154|vvi:100256203|histone H2A	GO:0000785//chromatin;GO:0043231//intracellular membrane-bounded organelle	GO:0003676//nucleic acid binding	GO:0034728//nucleosome organization	gi|225450811|ref|XP_002283971.1|/1.26843e-36/PREDICTED: probable histone H2A.5 [Vitis vinifera]
GSVIVT01035663001	2.5824	0.828338	K09422|1|4e-76|285|zma:100285081|myb proto-oncogene protein, plant	-	-	-	gi|296081882|emb|CBI20887.3|/0/unnamed protein product [Vitis vinifera]
GSVIVT01038271001	-1.61539	0.874248	K00297|1|2e-22|68.2|gmx:100797489|methylenetetrahydrofolate reductase (NADPH) [EC:1.5.1.20]	-	-	-	gi|296084385|emb|CBI24773.3|/0/unnamed protein product [Vitis vinifera]
GSVIVT01001114001	-1.11704	0.838193	-	-	GO:0003824//catalytic activity	-	gi|225425306|ref|XP_002273187.1|/4.7849e-127/PREDICTED: nudix hydrolase 13, mitochondrial-like [Vitis vinifera]
GSVIVT01038586001	1.09201	0.851214	-	GO:0009532//plastid stroma;GO:0044436;GO:0009534//chloroplast thylakoid	GO:0005488//binding	-	gi|359490718|ref|XP_002275994.2|/9.89079e-136/PREDICTED: thylakoid lumenal 17.4 kDa protein, chloroplastic [Vitis vinifera]
GSVIVT01021555001	1.2669	0.823862	-	GO:0000229;GO:0009536//plastid	-	GO:0006355//regulation of transcription, DNA-dependent	gi|359483911|ref|XP_002272288.2|/0/PREDICTED: uncharacterized protein LOC100251522 [Vitis vinifera]
GSVIVT01011847001	-1.43956	0.826778	-	-	GO:0003824//catalytic activity	GO:0009064//glutamine family amino acid metabolic process	gi|225424069|ref|XP_002279823.1|/0/PREDICTED: putative glutamine amidotransferase-like protein RP404 [Vitis vinifera]
GSVIVT01008324001	-4.82469	0.838261	K02183|1|5e-95|347|ath:AT5G57580|calmodulin	-	-	-	gi|297734237|emb|CBI15484.3|/0/unnamed protein product [Vitis vinifera]
GSVIVT01030534001	-3.43475	0.901713	-	-	-	-	gi|359485649|ref|XP_002271985.2|/4.27953e-134/PREDICTED: uncharacterized protein LOC100243092 [Vitis vinifera]
GSVIVT01007667001	1.02251	0.830711	K02900|1|3e-61|233|vvi:100250040|large subunit ribosomal protein L27Ae	GO:0015934//large ribosomal subunit	GO:0005198//structural molecule activity	GO:0010467//gene expression	gi|225456914|ref|XP_002281019.1|/3.22901e-60/PREDICTED: 60S ribosomal protein L27a-3 isoform 1 [Vitis vinifera]
GSVIVT01020552001	4.37518	0.885438	-	-	-	-	gi|302143295|emb|CBI21856.3|/2.60135e-128/unnamed protein product [Vitis vinifera]
GSVIVT01016871001	1.04175	0.835571	K00020|1|6e-87|319|olu:OSTLU_45774|3-hydroxyisobutyrate dehydrogenase [EC:1.1.1.31]	GO:0009532//plastid stroma	GO:0016616//oxidoreductase activity, acting on the CH-OH group of donors, NAD or NADP as acceptor;GO:0048037//cofactor binding	GO:0006007//glucose catabolic process;GO:0009081//branched-chain amino acid metabolic process	gi|225442309|ref|XP_002280297.1|/0/PREDICTED: putative oxidoreductase GLYR1-like [Vitis vinifera]
GSVIVT01020580001	4.81723	0.906393	-	GO:0009526//plastid envelope	GO:0015631//tubulin binding	GO:0007051//spindle organization	gi|302143320|emb|CBI21881.3|/0/unnamed protein product [Vitis vinifera]
GSVIVT01023105001	-1.22478	0.849632	K13447|1|2e-24|112|ppp:PHYPADRAFT_206166|respiratory burst oxidase [EC:1.6.3.- 1.11.1.-]	GO:0031224//intrinsic to membrane;GO:0009536//plastid	GO:0050664//oxidoreductase activity, acting on NAD(P)H, oxygen as acceptor;GO:0046914//transition metal ion binding;GO:0016723//oxidoreductase activity, oxidizing metal ions, NAD or NADP as acceptor;GO:0050662//coenzyme binding	GO:0009314//response to radiation;GO:0022900//electron transport chain	gi|297739426|emb|CBI29608.3|/0/unnamed protein product [Vitis vinifera]
GSVIVT01028071001	3.82921	0.877029	K00770|1|0.0|1181|vvi:100243459|1,4-beta-D-xylan synthase [EC:2.4.2.24]	GO:0043231//intracellular membrane-bounded organelle	GO:0016758//transferase activity, transferring hexosyl groups	GO:0006970//response to osmotic stress;GO:0048513//organ development;GO:0042546//cell wall biogenesis	gi|297743943|emb|CBI36913.3|/0/unnamed protein product [Vitis vinifera]
GSVIVT01004010001	1.16988	0.802364	K12373|1|4e-100|362|ath:AT1G65590|hexosaminidase [EC:3.2.1.52]	GO:0005618//cell wall;GO:0016020//membrane;GO:0031410//cytoplasmic vesicle	GO:0043167//ion binding;GO:0015929//hexosaminidase activity	GO:0044238//primary metabolic process	gi|225467652|ref|XP_002268354.1|/7.95864e-154/PREDICTED: beta-hexosaminidase subunit B2-like, partial [Vitis vinifera]
GSVIVT01002034001	1.25037	0.848773	-	-	-	-	gi|225470342|ref|XP_002269338.1|/6.59976e-126/PREDICTED: CBS domain-containing protein CBSX5 [Vitis vinifera]
GSVIVT01021237001	2.16998	0.846693	K14611|1|0.0|980|gmx:100795365|solute carrier family 23 (nucleobase transporter), member 1/2	GO:0044464//cell part	GO:0005215//transporter activity	GO:0006810//transport	gi|359483769|ref|XP_002265912.2|/0/PREDICTED: nucleobase-ascorbate transporter 2-like [Vitis vinifera]
GSVIVT01013055001	-2.15016	0.846467	K08235|1|1e-180|630|vvi:100267763|xyloglucan:xyloglucosyl transferase [EC:2.4.1.207]	GO:0005576//extracellular region;GO:0030312//external encapsulating structure	GO:0016798//hydrolase activity, acting on glycosyl bonds;GO:0016758//transferase activity, transferring hexosyl groups	GO:0044042//glucan metabolic process	gi|359474529|ref|XP_002275971.2|/0/PREDICTED: probable xyloglucan endotransglucosylase/hydrolase protein 30-like [Vitis vinifera]
GSVIVT01034038001	-2.16232	0.843596	-	-	-	-	gi|225440562|ref|XP_002276542.1|/4.5041e-90/PREDICTED: uncharacterized protein LOC100246012 [Vitis vinifera]
GSVIVT01028287001	1.54668	0.839866	-	-	-	-	gi|225437822|ref|XP_002262678.1|/2.43381e-91/PREDICTED: uncharacterized protein LOC100244659 [Vitis vinifera]
GSVIVT01027404001	-1.74923	0.844003	K00517|1|0.0|634|ath:AT1G01190|[EC:1.14.-.-];K05280|5|6e-70|263|aly:ARALYDRAFT_487632|flavonoid 3'-monooxygenase [EC:1.14.13.21]	-	GO:0004497//monooxygenase activity;GO:0005506//iron ion binding	GO:0008152//metabolic process	gi|225453569|ref|XP_002266493.1|/0/PREDICTED: cytochrome P450 78A3 [Vitis vinifera]
GSVIVT01008398001	1.69255	0.87721	K05350|1|0.0|1069|vvi:100255914|beta-glucosidase [EC:3.2.1.21]	GO:0005840//ribosome;GO:0005618//cell wall;GO:0031410//cytoplasmic vesicle	GO:0043167//ion binding;GO:0015923//mannosidase activity;GO:0008422//beta-glucosidase activity	GO:0044238//primary metabolic process	gi|225456104|ref|XP_002281407.1|/0/PREDICTED: beta-glucosidase 44 [Vitis vinifera]
GSVIVT01008116001	1.12646	0.836408	-	-	-	-	gi|297734074|emb|CBI15321.3|/1.95512e-50/unnamed protein product [Vitis vinifera]
GSVIVT01013695001	5.28911	0.81369	K00423|1|3e-65|248|ppp:PHYPADRAFT_163787|L-ascorbate oxidase [EC:1.10.3.3]	GO:0005576//extracellular region	GO:0046914//transition metal ion binding;GO:0016682//oxidoreductase activity, acting on diphenols and related substances as donors, oxygen as acceptor	GO:0009808//lignin metabolic process	gi|297739367|emb|CBI29357.3|/0/unnamed protein product [Vitis vinifera]
GSVIVT01011687001	-1.70837	0.896401	-	-	-	-	gi|225424333|ref|XP_002284819.1|/8.61625e-105/PREDICTED: protein PLANT CADMIUM RESISTANCE 2 [Vitis vinifera]
GSVIVT01016196001	-1.5794	0.815701	-	-	-	GO:0006810//transport	gi|296085964|emb|CBI31405.3|/0/unnamed protein product [Vitis vinifera]
GSVIVT01035315001	-3.77788	0.817306	K00924|1|6e-111|399|aly:ARALYDRAFT_489442|[EC:2.7.1.-];K08286|4|1e-63|241|ath:AT4G28490|protein-serine/threonine kinase [EC:2.7.11.-]	GO:0016020//membrane	GO:0016491//oxidoreductase activity;GO:0004674//protein serine/threonine kinase activity;GO:0000166//nucleotide binding	GO:0008152//metabolic process	gi|225429386|ref|XP_002278343.1|/0/PREDICTED: receptor-like protein kinase HSL1-like [Vitis vinifera]
GSVIVT01011881001	1.38938	0.835775	-	-	-	GO:0050896//response to stimulus	gi|225424007|ref|XP_002283457.1|/7.98221e-94/PREDICTED: universal stress protein YxiE-like [Vitis vinifera]
GSVIVT01018782001	4.56331	0.943872	-	-	-	-	gi|225431142|ref|XP_002267782.1|/4.44739e-149/PREDICTED: uncharacterized protein LOC100266022 [Vitis vinifera]
GSVIVT01031834001	-1.67442	0.838713	K06892|1|4e-108|389|ath:AT3G19010|;K05278|4|6e-43|173|pop:POPTR_665178|flavonol synthase [EC:1.14.11.23]	-	GO:0016491//oxidoreductase activity;GO:0046914//transition metal ion binding	GO:0008152//metabolic process	gi|225428668|ref|XP_002284910.1|/0/PREDICTED: protein SRG1 [Vitis vinifera]
GSVIVT01000521001	2.09655	0.879922	K00660|1|0.0|432|vvi:100258106|chalcone synthase [EC:2.3.1.74]	-	GO:0016747//transferase activity, transferring acyl groups other than amino-acyl groups	GO:0009699//phenylpropanoid biosynthetic process	gi|18376653|dbj|BAB84111.1|/0/chalcone synthase [Vitis vinifera]
GSVIVT01007740001	1.41828	0.836656	K09422|1|3e-121|432|vvi:100244963|myb proto-oncogene protein, plant	GO:0043231//intracellular membrane-bounded organelle	GO:0003676//nucleic acid binding	GO:0003002//regionalization;GO:0009913//epidermal cell differentiation;GO:0000904//cell morphogenesis involved in differentiation	gi|359491528|ref|XP_002279128.2|/1.39751e-115/PREDICTED: transcription factor WER-like [Vitis vinifera]
GSVIVT01020834001	-3.61072	0.875921	-	-	GO:0003676//nucleic acid binding	-	gi|225446795|ref|XP_002283251.1|/1.22653e-177/PREDICTED: NAC domain-containing protein 42 [Vitis vinifera]
GSVIVT01024934001	-1.23205	0.824359	K14494|1|2e-08|56.6|aly:ARALYDRAFT_475738|DELLA protein	-	-	GO:0009743//response to carbohydrate stimulus	gi|225434905|ref|XP_002283383.1|/6.04981e-41/PREDICTED: scarecrow-like protein 14-like [Vitis vinifera]
GSVIVT01023863001	1.83781	0.878589	K15272|1|2e-178|623|vvi:100248746|solute carrier family 35 (UDP-sugar transporter), member A1/2/3;K01376|2|2e-150|530|ath:AT4G35350|[EC:3.4.22.-];K01365|3|1e-143|508|mtr:MTR_3g116080|cathepsin L [EC:3.4.22.15]	GO:0005773//vacuole	GO:0004175//endopeptidase activity;GO:0016628//oxidoreductase activity, acting on the CH-CH group of donors, NAD or NADP as acceptor	GO:0019538//protein metabolic process;GO:0012501//programmed cell death	gi|297744465|emb|CBI37727.3|/0/unnamed protein product [Vitis vinifera]
GSVIVT01015952001	-3.24579	0.894028	K13424|1|4e-17|87.8|rcu:RCOM_0664190|WRKY transcription factor 33	-	-	-	gi|298204668|emb|CBI25166.3|/3.5833e-141/unnamed protein product [Vitis vinifera]
GSVIVT01014640001	1.11505	0.857837	K02946|1|2e-84|310|vvi:100248042|small subunit ribosomal protein S10	GO:0030529//ribonucleoprotein complex;GO:0009536//plastid	GO:0003723//RNA binding;GO:0005198//structural molecule activity	GO:0010467//gene expression	gi|296089888|emb|CBI39707.3|/2.31882e-83/unnamed protein product [Vitis vinifera]
GSVIVT01028336001	1.32463	0.841901	-	GO:0043231//intracellular membrane-bounded organelle	-	-	gi|225438139|ref|XP_002278457.1|/5.29598e-82/PREDICTED: uncharacterized protein LOC100263547 [Vitis vinifera]
GSVIVT01033540001	-2.34719	0.877797	-	-	GO:0043167//ion binding;GO:0008422//beta-glucosidase activity	GO:0044238//primary metabolic process;GO:0006950//response to stress	gi|225441373|ref|XP_002277446.1|/1.66038e-164/PREDICTED: glucan endo-1,3-beta-glucosidase [Vitis vinifera]
GSVIVT01024442001	3.84634	0.885167	-	-	-	-	gi|359489912|ref|XP_003633996.1|/1.27518e-49/PREDICTED: uncharacterized protein LOC100854324 [Vitis vinifera]
GSVIVT01029852001	-2.93254	0.912699	K13448|1|4e-76|283|vvi:100251912|calcium-binding protein CML	-	GO:0046872//metal ion binding	GO:0000904//cell morphogenesis involved in differentiation	gi|296085824|emb|CBI31148.3|/1.03255e-158/unnamed protein product [Vitis vinifera]
GSVIVT01031252001	3.11143	0.806637	-	-	-	-	gi|296089787|emb|CBI39606.3|/7.97639e-72/unnamed protein product [Vitis vinifera]
GSVIVT01028741001	2.86321	0.888331	-	GO:0031224//intrinsic to membrane	-	-	gi|225462683|ref|XP_002265607.1|/6.67689e-18/PREDICTED: arabinogalactan peptide 20 [Vitis vinifera]
GSVIVT01019841001	-3.03037	0.865184	-	-	-	-	gi|225426799|ref|XP_002276431.1|/3.15886e-94/PREDICTED: thaumatin-like protein [Vitis vinifera]
GSVIVT01022205001	-2.14517	0.887518	K09755|1|2e-130|464|rcu:RCOM_0193830|ferulate-5-hydroxylase [EC:1.14.-.-]	-	GO:0016709//oxidoreductase activity, acting on paired donors, with incorporation or reduction of molecular oxygen, NAD(P)H as one donor, and incorporation of one atom of oxygen;GO:0005506//iron ion binding	GO:0008152//metabolic process	gi|296082482|emb|CBI21487.3|/0/unnamed protein product [Vitis vinifera]
GSVIVT01012213001	1.27974	0.838985	-	-	GO:0003824//catalytic activity	-	gi|225423481|ref|XP_002274292.1|/0/PREDICTED: uncharacterized hydrolase yugF [Vitis vinifera]
GSVIVT01011412001	2.67861	0.922013	-	-	-	-	gi|225452811|ref|XP_002283517.1|/4.9807e-43/PREDICTED: gibberellin-regulated protein 4 [Vitis vinifera]
GSVIVT01032047001	5.57742	0.955378	K11253|1|3e-31|132|vcn:VOLCADRAFT_101585|histone H3	GO:0043231//intracellular membrane-bounded organelle	GO:0005488//binding	-	gi|297736214|emb|CBI24852.3|/1.85848e-39/unnamed protein product [Vitis vinifera]
GSVIVT01023471001	-1.0412	0.838284	K08770|1|0.0|1247|vvi:100267431|ubiquitin C	-	-	-	gi|302143601|emb|CBI22354.3|/0/unnamed protein product [Vitis vinifera]
GSVIVT01028204001	1.32005	0.878159	K08912|1|3e-101|365|vvi:100252066|light-harvesting complex II chlorophyll a/b binding protein 1	GO:0044464//cell part	-	GO:0044237//cellular metabolic process	gi|297744047|emb|CBI37017.3|/5.17732e-107/unnamed protein product [Vitis vinifera]
GSVIVT01025316001	4.91241	0.956779	K11253|1|7e-37|150|mtr:MTR_1g105310|histone H3	GO:0043231//intracellular membrane-bounded organelle	GO:0005488//binding	-	gi|297746363|emb|CBI16419.3|/6.00081e-72/unnamed protein product [Vitis vinifera]
GSVIVT01008882001	2.00115	0.833107	K13473|1|1e-30|132|sbi:SORBI_09g001743|chitin elicitor-binding protein;K13429|3|3e-09|61.6|rcu:RCOM_1115620|chitin elicitor receptor kinase 1	GO:0031225//anchored to membrane	-	GO:0009056//catabolic process	gi|302141828|emb|CBI19031.3|/0/unnamed protein product [Vitis vinifera]
GSVIVT01009924001	-1.35847	0.869682	K03686|1|7e-07|53.1|ppp:PHYPADRAFT_108109|molecular chaperone DnaJ	-	-	-	gi|302142676|emb|CBI19879.3|/1.35453e-112/unnamed protein product [Vitis vinifera]
GSVIVT01008003001	1.18611	0.864528	-	-	-	-	gi|225457421|ref|XP_002284937.1|/8.75855e-55/PREDICTED: gibberellin-regulated protein 6 [Vitis vinifera]
GSVIVT01009991001	-2.60292	0.880148	-	-	-	-	gi|302142735|emb|CBI19938.3|/1.69726e-145/unnamed protein product [Vitis vinifera]
GSVIVT01014068001	3.2996	0.908789	K14489|1|1e-10|64.3|vvi:100263145|arabidopsis histidine kinase 2/3/4 (cytokinin receptor) [EC:2.7.13.3]	GO:0031410//cytoplasmic vesicle	GO:0003824//catalytic activity	-	gi|225461844|ref|XP_002285661.1|/1.08405e-54/PREDICTED: glucan endo-1,3-beta-glucosidase [Vitis vinifera]
GSVIVT01030658001	5.14987	0.960125	K07374|1|5e-20|94.0|mtr:MTR_4g097830|tubulin alpha	GO:0032991//macromolecular complex;GO:0015630//microtubule cytoskeleton	GO:0017111//nucleoside-triphosphatase activity;GO:0032561//guanyl ribonucleotide binding	GO:0043623//cellular protein complex assembly;GO:0009207;GO:0007017//microtubule-based process	gi|296087075|emb|CBI33449.3|/1.24975e-32/unnamed protein product [Vitis vinifera]
GSVIVT01025046001	2.78991	0.811768	K00423|1|1e-58|226|ppp:PHYPADRAFT_163787|L-ascorbate oxidase [EC:1.10.3.3]	GO:0005576//extracellular region	GO:0046914//transition metal ion binding;GO:0016682//oxidoreductase activity, acting on diphenols and related substances as donors, oxygen as acceptor	GO:0009808//lignin metabolic process	gi|225435092|ref|XP_002284473.1|/0/PREDICTED: laccase-17 [Vitis vinifera]
GSVIVT01011562001	1.0015	0.82619	K03246|1|0.0|666|vvi:100250769|translation initiation factor 3 subunit I	GO:0031461//cullin-RING ubiquitin ligase complex	GO:0008135//translation factor activity, nucleic acid binding	GO:0006970//response to osmotic stress;GO:0006412//translation;GO:0010038//response to metal ion	gi|225424530|ref|XP_002285281.1|/0/PREDICTED: eukaryotic translation initiation factor 3 subunit I [Vitis vinifera]
GSVIVT01035140001	1.04573	0.841449	-	-	-	-	gi|225431741|ref|XP_002269079.1|/1.26473e-49/PREDICTED: phylloplanin [Vitis vinifera]
GSVIVT01003141001	-1.17009	0.834102	-	-	-	-	gi|225437182|ref|XP_002280916.1|/0/PREDICTED: uncharacterized protein LOC100245954 isoform 1 [Vitis vinifera]
GSVIVT01024624001	-1.60058	0.860165	K13424|1|0.0|827|vvi:100243352|WRKY transcription factor 33	-	-	-	gi|297745809|emb|CBI15865.3|/0/unnamed protein product [Vitis vinifera]
GSVIVT01008643001	1.70638	0.898978	K03428|1|1e-140|497|vvi:100243913|magnesium-protoporphyrin O-methyltransferase [EC:2.1.1.11]	GO:0009526//plastid envelope	GO:0008171//O-methyltransferase activity	GO:0006779//porphyrin-containing compound biosynthetic process;GO:0006730//one-carbon metabolic process	gi|297734506|emb|CBI15753.3|/1.17634e-156/unnamed protein product [Vitis vinifera]
GSVIVT01028569001	-1.69919	0.839143	-	-	-	-	gi|225464227|ref|XP_002265934.1|/1.3469e-138/PREDICTED: uncharacterized protein LOC100254562 [Vitis vinifera]
GSVIVT01018021001	2.84684	0.867919	-	-	-	-	gi|297737091|emb|CBI26292.3|/0/unnamed protein product [Vitis vinifera]
GSVIVT01003670001	2.07447	0.856436	K11449|1|2e-06|52.0|vvi:100244450|jumonji domain-containing protein 1C [EC:1.14.11.-]	-	-	-	gi|297745657|emb|CBI40868.3|/0/unnamed protein product [Vitis vinifera]
GSVIVT01035433001	-2.8489	0.808603	K13993|1|9e-32|133|vvi:100245734|HSP20 family protein	-	-	-	gi|296081686|emb|CBI20691.3|/8.97042e-39/unnamed protein product [Vitis vinifera]
GSVIVT01020172001	1.19171	0.801438	-	GO:0009536//plastid	-	-	gi|225424758|ref|XP_002268027.1|/9.08257e-95/PREDICTED: uncharacterized protein LOC100260319 [Vitis vinifera]
GSVIVT01036278001	-1.35697	0.849089	-	GO:0030312//external encapsulating structure	GO:0030247//polysaccharide binding	GO:0006952//defense response	gi|147844408|emb|CAN80017.1|/2.12863e-74/hypothetical protein VITISV_026189 [Vitis vinifera]
GSVIVT01035307001	-2.76075	0.853587	K00924|1|2e-50|197|ath:AT5G25930|[EC:2.7.1.-]	-	-	-	gi|296081577|emb|CBI20582.3|/5.19359e-125/unnamed protein product [Vitis vinifera]
GSVIVT01009895001	5.35144	0.926308	K05868|1|0.0|840|vvi:100267672|cyclin B	GO:0043231//intracellular membrane-bounded organelle	GO:0019887//protein kinase regulator activity	GO:0007049//cell cycle	gi|302142651|emb|CBI19854.3|/0/unnamed protein product [Vitis vinifera]
GSVIVT01003989001	-1.08412	0.825331	K00006|1|0.0|754|vvi:100261224|glycerol-3-phosphate dehydrogenase (NAD+) [EC:1.1.1.8]	GO:0043234//protein complex;GO:0044424//intracellular part	GO:0042802//identical protein binding;GO:0016616//oxidoreductase activity, acting on the CH-OH group of donors, NAD or NADP as acceptor;GO:0048037//cofactor binding;GO:0000166//nucleotide binding	GO:0006072//glycerol-3-phosphate metabolic process	gi|225452250|ref|XP_002271417.1|/0/PREDICTED: glycerol-3-phosphate dehydrogenase [NAD+] [Vitis vinifera]
GSVIVT01033968001	1.37152	0.814549	K09648|1|4e-100|362|vvi:100244265|mitochondrial inner membrane protease subunit 2 [EC:3.4.21.-]	GO:0044464//cell part	GO:0070011//peptidase activity, acting on L-amino acid peptides	GO:0019538//protein metabolic process	gi|225440672|ref|XP_002279805.1|/4.30844e-99/PREDICTED: mitochondrial inner membrane protease subunit 2 [Vitis vinifera]
GSVIVT01037881001	1.62813	0.899589	K15223|1|1e-15|82.4|smo:SELMODRAFT_176439|upstream activation factor subunit UAF30	-	-	-	gi|225429337|ref|XP_002272147.1|/6.36542e-70/PREDICTED: upstream activation factor subunit spp27 [Vitis vinifera]
GSVIVT01033538001	-2.46657	0.829558	-	-	GO:0016787//hydrolase activity	-	gi|297739869|emb|CBI30051.3|/1.56083e-131/unnamed protein product [Vitis vinifera]
GSVIVT01020132001	-1.00019	0.844523	-	GO:0043231//intracellular membrane-bounded organelle	GO:0003676//nucleic acid binding;GO:0046914//transition metal ion binding	GO:0010038//response to metal ion;GO:0009725//response to hormone stimulus;GO:0006970//response to osmotic stress	gi|147793149|emb|CAN73090.1|/1.6979e-139/hypothetical protein VITISV_028723 [Vitis vinifera]
GSVIVT01024200001	1.23864	0.824359	K07574|1|2e-106|384|vvi:100243481|RNA-binding protein	GO:0009536//plastid	GO:0003676//nucleic acid binding	-	gi|225427732|ref|XP_002265886.1|/2.32646e-105/PREDICTED: uncharacterized protein LOC100243481 [Vitis vinifera]
GSVIVT01018512001	3.81443	0.900267	-	GO:0005881//cytoplasmic microtubule	GO:0015631//tubulin binding	GO:0051707//response to other organism;GO:0031109//microtubule polymerization or depolymerization;GO:0048285;GO:0052093	gi|225455563|ref|XP_002267584.1|/0/PREDICTED: 65-kDa microtubule-associated protein 3 [Vitis vinifera]
GSVIVT01025318001	5.36625	0.920905	K11253|1|2e-24|108|mtr:MTR_1g105310|histone H3	GO:0043231//intracellular membrane-bounded organelle	GO:0005488//binding	-	gi|297746365|emb|CBI16421.3|/1.83362e-31/unnamed protein product [Vitis vinifera]
GSVIVT01027849001	3.75076	0.852774	-	GO:0043231//intracellular membrane-bounded organelle;GO:0044444//cytoplasmic part	GO:0003774//motor activity;GO:0000166//nucleotide binding	-	gi|296083681|emb|CBI23670.3|/3.84648e-96/unnamed protein product [Vitis vinifera]
GSVIVT01010106001	1.03385	0.805348	K13606|1|0.0|648|vvi:100265035|chlorophyll(ide) b reductase [EC:1.1.1.294]	GO:0009536//plastid	GO:0003676//nucleic acid binding;GO:0016616//oxidoreductase activity, acting on the CH-OH group of donors, NAD or NADP as acceptor	GO:0006787;GO:0044257//cellular protein catabolic process	gi|225424993|ref|XP_002266979.1|/0/PREDICTED: chlorophyll(ide) b reductase NOL, chloroplastic [Vitis vinifera]
GSVIVT01015550001	2.45903	0.906076	-	-	-	-	gi|225445531|ref|XP_002285275.1|/1.7279e-96/PREDICTED: uncharacterized protein LOC100257716 [Vitis vinifera]
GSVIVT01028074001	2.8996	0.87183	K11275|1|7e-25|112|bdi:100833820|histone H1/5	-	-	-	gi|297743945|emb|CBI36915.3|/8.86284e-101/unnamed protein product [Vitis vinifera]
GSVIVT01038260001	1.36306	0.843732	K00215|1|0.0|650|vvi:100268085|dihydrodipicolinate reductase [EC:1.3.1.26]	GO:0009536//plastid	GO:0016628//oxidoreductase activity, acting on the CH-CH group of donors, NAD or NADP as acceptor	GO:0009089//lysine biosynthetic process via diaminopimelate	gi|296084376|emb|CBI24764.3|/0/unnamed protein product [Vitis vinifera]
GSVIVT01014290001	1.17131	0.862539	K02968|1|2e-79|294|vvi:100265925|small subunit ribosomal protein S20	GO:0009532//plastid stroma;GO:0030529//ribonucleoprotein complex	GO:0003723//RNA binding;GO:0005198//structural molecule activity	GO:0010467//gene expression;GO:0022613//ribonucleoprotein complex biogenesis	gi|225461526|ref|XP_002285149.1|/1.94809e-78/PREDICTED: 30S ribosomal protein S20, chloroplastic [Vitis vinifera]
GSVIVT01020781001	-1.6327	0.833356	-	-	-	-	gi|302143480|emb|CBI22041.3|/0/unnamed protein product [Vitis vinifera]
GSVIVT01018250001	1.18034	0.807021	K01802|1|1e-15|82.0|ath:AT2G43560|peptidylprolyl isomerase [EC:5.2.1.8];K14826|3|7e-13|73.2|rcu:RCOM_1499110|FK506-binding nuclear protein [EC:5.2.1.8]	GO:0044436;GO:0009534//chloroplast thylakoid	GO:0016859//cis-trans isomerase activity;GO:0005527//macrolide binding	GO:0044267//cellular protein metabolic process;GO:0019684//photosynthesis, light reaction	gi|225453422|ref|XP_002274957.1|/3.50497e-151/PREDICTED: FKBP-type peptidyl-prolyl cis-trans isomerase 6, chloroplastic [Vitis vinifera]
GSVIVT01013905001	-3.91679	0.872214	K09286|1|5e-79|292|vvi:100254616|EREBP-like factor	GO:0043231//intracellular membrane-bounded organelle	GO:0003676//nucleic acid binding;GO:0001071//nucleic acid binding transcription factor activity	GO:0006351//transcription, DNA-dependent	gi|297744997|emb|CBI38589.3|/1.85059e-138/unnamed protein product [Vitis vinifera]
GSVIVT01028809001	1.72814	0.858018	K12843|1|9e-41|166|vvi:100248403|U4/U6 small nuclear ribonucleoprotein PRP3;K05681|3|9e-31|133|cme:CMS467C|ATP-binding cassette, subfamily G (WHITE), member 2	GO:0044464//cell part	GO:0017111//nucleoside-triphosphatase activity;GO:0000166//nucleotide binding	-	gi|302143755|emb|CBI22616.3|/0/unnamed protein product [Vitis vinifera]
GSVIVT01037791001	3.51187	0.852344	K13289|1|2e-116|417|mtr:MTR_4g021500|cathepsin A (carboxypeptidase C) [EC:3.4.16.5];K09756|3|1e-108|392|ath:AT5G09640|serine carboxypeptidase-like 19 [EC:3.4.16.- 2.3.1.91]	-	GO:0004180//carboxypeptidase activity	GO:0019538//protein metabolic process	gi|225429053|ref|XP_002269439.1|/0/PREDICTED: serine carboxypeptidase-like 18-like [Vitis vinifera]
GSVIVT01017937001	-2.07729	0.856549	K08150|1|1e-56|219|aly:ARALYDRAFT_322009|MFS transporter, SP family, solute carrier family 2 (myo-inositol transporter), member 13	GO:0031224//intrinsic to membrane	GO:0016628//oxidoreductase activity, acting on the CH-CH group of donors, NAD or NADP as acceptor;GO:0005356	GO:0008152//metabolic process;GO:0071702	gi|66016961|gb|AAT09979.1|/0/hexose transporter [Vitis vinifera]
GSVIVT01026985001	1.63237	0.871897	K01184|1|2e-23|108|ath:AT5G17200|polygalacturonase [EC:3.2.1.15]	-	GO:0004553//hydrolase activity, hydrolyzing O-glycosyl compounds	GO:0044238//primary metabolic process;GO:0045229//external encapsulating structure organization	gi|297745346|emb|CBI40426.3|/0/unnamed protein product [Vitis vinifera]
GSVIVT01003132001	-4.88219	0.852638	K13448|1|2e-60|229|vvi:100244152|calcium-binding protein CML	-	GO:0046872//metal ion binding;GO:0016628//oxidoreductase activity, acting on the CH-CH group of donors, NAD or NADP as acceptor	GO:0008152//metabolic process	gi|225437168|ref|XP_002274848.1|/2.4509e-78/PREDICTED: calmodulin-like protein 8 [Vitis vinifera]
GSVIVT01027967001	-1.02633	0.805574	-	-	-	-	gi|359479890|ref|XP_003632371.1|/4.27741e-37/PREDICTED: uncharacterized protein LOC100246955 [Vitis vinifera]
GSVIVT01033677001	1.08993	0.854605	K09873|1|9e-60|228|aly:ARALYDRAFT_912085|aquaporin TIP	GO:0031224//intrinsic to membrane	-	GO:0006810//transport	gi|297739981|emb|CBI30163.3|/4.2784e-98/unnamed protein product [Vitis vinifera]
GSVIVT01007873001	1.79169	0.895542	K14489|1|3e-15|81.3|vvi:100263145|arabidopsis histidine kinase 2/3/4 (cytokinin receptor) [EC:2.7.13.3]	GO:0005911//cell-cell junction;GO:0031224//intrinsic to membrane	GO:0030247//polysaccharide binding	-	gi|225457225|ref|XP_002284112.1|/6.08389e-82/PREDICTED: glucan endo-1,3-beta-glucosidase-like protein 3 [Vitis vinifera]
GSVIVT01004932001	1.23049	0.869637	-	-	GO:0019842//vitamin binding;GO:0022892	GO:0006631//fatty acid metabolic process	gi|225425224|ref|XP_002267614.1|/5.27095e-59/PREDICTED: acyl carrier protein 4, chloroplastic [Vitis vinifera]
GSVIVT01034361001	4.62559	0.919232	K10802|1|1e-29|128|ppp:PHYPADRAFT_106639|high mobility group protein B1	GO:0043231//intracellular membrane-bounded organelle	GO:0003676//nucleic acid binding	-	gi|359484115|ref|XP_002267697.2|/2.9504e-96/PREDICTED: high mobility group B protein 7-like [Vitis vinifera]
GSVIVT01021727001	3.73744	0.928003	-	GO:0044444//cytoplasmic part;GO:0031224//intrinsic to membrane;GO:0043231//intracellular membrane-bounded organelle	-	GO:0051234//establishment of localization	gi|297740886|emb|CBI31068.3|/0/unnamed protein product [Vitis vinifera]
GSVIVT01022018001	1.38495	0.83218	K14490|1|1e-80|298|vvi:100250410|histidine-containing phosphotransfer peotein	-	GO:0016628//oxidoreductase activity, acting on the CH-CH group of donors, NAD or NADP as acceptor;GO:0060089	GO:0008152//metabolic process;GO:0007165//signal transduction	gi|225451088|ref|XP_002265307.1|/1.27514e-79/PREDICTED: histidine-containing phosphotransfer protein 1 [Vitis vinifera]
GSVIVT01018744001	4.50174	0.880578	-	-	GO:0005488//binding	-	gi|297734984|emb|CBI17346.3|/0/unnamed protein product [Vitis vinifera]
GSVIVT01017210001	1.08544	0.849677	-	-	GO:0060089	GO:0009314//response to radiation;GO:0023052//signaling	gi|225442789|ref|XP_002281013.1|/0/PREDICTED: root phototropism protein 3 [Vitis vinifera]
GSVIVT01000472001	4.71291	0.804037	K14329|1|5e-51|200|ath:AT5G61160|agmatine coumaroyltransferase [EC:2.3.1.64 2.3.1.-];K13065|3|7e-19|93.6|sbi:SORBI_04g025760|shikimate O-hydroxycinnamoyltransferase [EC:2.3.1.133]	-	GO:0016740//transferase activity	-	gi|225447675|ref|XP_002275913.1|/0/PREDICTED: anthocyanin 5-aromatic acyltransferase [Vitis vinifera]
GSVIVT01035476001	2.79242	0.812492	K00924|1|7e-130|463|ath:AT1G75820|[EC:2.7.1.-];K08286|2|3e-129|461|ath:AT4G28490|protein-serine/threonine kinase [EC:2.7.11.-];K13420|4|4e-120|431|aly:ARALYDRAFT_356368|LRR receptor-like serine/threonine-protein kinase FLS2 [EC:2.7.11.1]	GO:0031224//intrinsic to membrane;GO:0043231//intracellular membrane-bounded organelle;GO:0031410//cytoplasmic vesicle	GO:0004672//protein kinase activity;GO:0016628//oxidoreductase activity, acting on the CH-CH group of donors, NAD or NADP as acceptor;GO:0032559	GO:0006952//defense response;GO:0009886//post-embryonic morphogenesis;GO:0016049//cell growth;GO:0009943//adaxial/abaxial axis specification;GO:0009887//organ morphogenesis;GO:0007155//cell adhesion;GO:0006833//water transport;GO:0050794//regulation of cellular process;GO:0003006//developmental process involved in reproduction;GO:0006464//cellular protein modification process	gi|225429690|ref|XP_002280069.1|/0/PREDICTED: LRR receptor-like serine/threonine-protein kinase ERECTA [Vitis vinifera]
GSVIVT01028395001	3.5505	0.848433	-	-	-	-	gi|297744196|emb|CBI37166.3|/0/unnamed protein product [Vitis vinifera]
GSVIVT01011760001	-1.86325	0.814594	K09510|1|2e-14|78.2|zma:100191212|DnaJ homolog subfamily B member 4	-	GO:0005515//protein binding	GO:0044267//cellular protein metabolic process	gi|297737710|emb|CBI26911.3|/5.62431e-109/unnamed protein product [Vitis vinifera]
GSVIVT01036446001	1.86862	0.85404	K09422|1|2e-75|281|vvi:100256209|myb proto-oncogene protein, plant	-	-	-	gi|298204377|emb|CBI16857.3|/2.0341e-171/unnamed protein product [Vitis vinifera]
GSVIVT01037722001	1.00356	0.817013	-	GO:0009526//plastid envelope;GO:0009532//plastid stroma	GO:0016859//cis-trans isomerase activity	GO:0006810//transport;GO:0044267//cellular protein metabolic process	gi|225460855|ref|XP_002277545.1|/0/PREDICTED: trigger factor isoform 1 [Vitis vinifera]
GSVIVT01013304001	1.08563	0.824156	K02904|1|9e-68|255|vvi:100248255|large subunit ribosomal protein L29	GO:0009526//plastid envelope;GO:0043232;GO:0009532//plastid stroma;GO:0030529//ribonucleoprotein complex	GO:0005198//structural molecule activity	GO:0010467//gene expression;GO:0022613//ribonucleoprotein complex biogenesis	gi|359485888|ref|XP_003633349.1|/1.08018e-66/PREDICTED: 50S ribosomal protein L29, chloroplastic-like [Vitis vinifera]
GSVIVT01006634001	1.79069	0.883901	K01626|1|0.0|1045|vvi:100258475|3-deoxy-7-phosphoheptulonate synthase [EC:2.5.1.54]	-	GO:0016765//transferase activity, transferring alkyl or aryl (other than methyl) groups	GO:0008652//cellular amino acid biosynthetic process	gi|359496691|ref|XP_003635302.1|/0/PREDICTED: phospho-2-dehydro-3-deoxyheptonate aldolase 1, chloroplastic [Vitis vinifera]
GSVIVT01029202001	1.08714	0.841607	K08900|1|0.0|738|pop:POPTR_262253|mitochondrial chaperone BCS1	GO:0044464//cell part	GO:0017111//nucleoside-triphosphatase activity;GO:0032559	-	gi|359485008|ref|XP_002269013.2|/0/PREDICTED: probable mitochondrial chaperone BCS1-B-like [Vitis vinifera]
GSVIVT01011897001	-1.07122	0.831186	K10268|1|4e-26|119|smo:SELMODRAFT_420841|F-box and leucine-rich repeat protein 2/20;K12135|4|1e-11|71.2|aly:ARALYDRAFT_488429|zinc finger protein CONSTANS	GO:0044464//cell part	GO:0046914//transition metal ion binding	-	gi|225423977|ref|XP_002282578.1|/0/PREDICTED: zinc finger protein CONSTANS-LIKE 16 [Vitis vinifera]
GSVIVT01008217001	3.82433	0.812966	K10401|1|0.0|860|mtr:MTR_4g112350|kinesin family member 18/19	GO:0015630//microtubule cytoskeleton	GO:0003774//motor activity;GO:0032559	GO:0007017//microtubule-based process	gi|297734150|emb|CBI15397.3|/0/unnamed protein product [Vitis vinifera]
GSVIVT01011585001	4.72807	0.899769	K08243|1|2e-88|324|gmx:547911|6'-deoxychalcone synthase [EC:2.3.1.170];K00011|3|1e-74|278|ath:AT2G37790|aldehyde reductase [EC:1.1.1.21];K00002|4|1e-68|258|osa:4338987|alcohol dehydrogenase (NADP+) [EC:1.1.1.2];K00085|5|4e-52|203|ath:AT2G21260|aldose-6-phosphate reductase (NADPH2) [EC:1.1.1.200]	-	GO:0016747//transferase activity, transferring acyl groups other than amino-acyl groups	GO:0008152//metabolic process	gi|297737569|emb|CBI26770.3|/0/unnamed protein product [Vitis vinifera]
GSVIVT01001327001	6.79939	0.958203	K01051|1|5e-89|326|ppp:PHYPADRAFT_135307|pectinesterase [EC:3.1.1.11]	GO:0005618//cell wall	GO:0004091//carboxylesterase activity	GO:0071555//cell wall organization	gi|359474375|ref|XP_002266321.2|/0/PREDICTED: probable pectinesterase 68-like [Vitis vinifera]
GSVIVT01011777001	2.49992	0.886274	K07213|1|2e-09|62.8|vvi:100247137|copper chaperone	-	-	-	gi|225424186|ref|XP_002284132.1|/2.26539e-159/PREDICTED: uncharacterized protein LOC100249220 [Vitis vinifera]
GSVIVT01035897001	-1.04438	0.8379	K12581|1|5e-49|190|vvi:100255985|CCR4-NOT transcription complex subunit 7/8	-	GO:0016787//hydrolase activity	-	gi|296082073|emb|CBI21078.3|/1.37605e-55/unnamed protein product [Vitis vinifera]
GSVIVT01013446001	2.581	0.829016	K02178|1|0.0|786|vvi:100244507|checkpoint serine/threonine-protein kinase [EC:2.7.11.1]	GO:0000775//chromosome, centromeric region	-	GO:0045841//negative regulation of mitotic metaphase/anaphase transition	gi|297745617|emb|CBI40782.3|/0/unnamed protein product [Vitis vinifera]
GSVIVT01038125001	-2.01012	0.851666	K01183|1|6e-106|383|vvi:100250948|chitinase [EC:3.2.1.14]	-	GO:0004553//hydrolase activity, hydrolyzing O-glycosyl compounds;GO:0030247//polysaccharide binding	GO:0006026	gi|296084271|emb|CBI24659.3|/0/unnamed protein product [Vitis vinifera]
GSVIVT01001046001	3.98068	0.820448	K02209|1|0.0|1430|vvi:100261877|minichromosome maintenance protein 5 (cell division control protein 46)	GO:0043231//intracellular membrane-bounded organelle	GO:0003676//nucleic acid binding;GO:0042623//ATPase activity, coupled;GO:0032559	GO:0006261//DNA-dependent DNA replication	gi|296084590|emb|CBI25611.3|/0/unnamed protein product [Vitis vinifera]
GSVIVT01033358001	5.01108	0.811994	-	-	-	GO:0009987//cellular process	gi|297739721|emb|CBI29903.3|/1.71778e-90/unnamed protein product [Vitis vinifera]
GSVIVT01015018001	1.04782	0.845382	K00695|1|0.0|1599|vvi:100249279|sucrose synthase [EC:2.4.1.13]	-	GO:0035251//UDP-glucosyltransferase activity	GO:0005984//disaccharide metabolic process	gi|225444613|ref|XP_002275155.1|/0/PREDICTED: sucrose synthase [Vitis vinifera]
GSVIVT01023461001	-1.51366	0.878589	K08770|1|1e-144|510|bdi:100831055|ubiquitin C	GO:0031410//cytoplasmic vesicle;GO:0043231//intracellular membrane-bounded organelle	-	GO:0043412//macromolecule modification;GO:0010033//response to organic substance;GO:0032502//developmental process	gi|302143596|emb|CBI22349.3|/3.76602e-164/unnamed protein product [Vitis vinifera]
GSVIVT01035559001	4.61536	0.923437	K08486|1|1e-73|274|aly:ARALYDRAFT_470918|syntaxin 1B/2/3	GO:0044444//cytoplasmic part;GO:0016020//membrane	GO:0005515//protein binding	GO:0016044//cellular membrane organization;GO:0015031//protein transport	gi|296081789|emb|CBI20794.3|/1.70487e-134/unnamed protein product [Vitis vinifera]
GSVIVT01035884001	-2.83592	0.879945	K13424|1|3e-17|87.4|vvi:100243352|WRKY transcription factor 33	-	-	-	gi|296082063|emb|CBI21068.3|/2.98399e-139/unnamed protein product [Vitis vinifera]
GSVIVT01009003001	2.49908	0.849948	K15920|1|0.0|710|sbi:SORBI_06g030270|beta-D-xylosidase 4 [EC:3.2.1.37]	GO:0005576//extracellular region;GO:0005618//cell wall;GO:0009536//plastid	GO:0004553//hydrolase activity, hydrolyzing O-glycosyl compounds	GO:0044238//primary metabolic process	gi|302141935|emb|CBI19138.3|/0/unnamed protein product [Vitis vinifera]
GSVIVT01016137001	1.05185	0.827818	-	GO:0009536//plastid	GO:0000166//nucleotide binding	GO:0022900//electron transport chain;GO:0007275//multicellular organismal development	gi|225443292|ref|XP_002274572.1|/0/PREDICTED: uncharacterized protein LOC100260424 [Vitis vinifera]
GSVIVT01012160001	1.22113	0.802613	-	-	-	-	gi|225423583|ref|XP_002273533.1|/2.38093e-33/PREDICTED: mitochondral 37S ribosomal protein S27 [Vitis vinifera]
GSVIVT01019511001	-3.85143	0.924025	K13426|1|5e-14|77.0|rcu:RCOM_1689100|WRKY transcription factor 29;K13424|4|5e-13|73.6|rcu:RCOM_0664190|WRKY transcription factor 33	-	GO:0003677//DNA binding;GO:0001071//nucleic acid binding transcription factor activity	GO:0010467//gene expression	gi|225426000|ref|XP_002272720.1|/0/PREDICTED: probable WRKY transcription factor 41 [Vitis vinifera]
GSVIVT01010913001	1.13002	0.830078	K01047|1|2e-87|320|vvi:100243777|phospholipase A2 [EC:3.1.1.4]	GO:0043231//intracellular membrane-bounded organelle	GO:0046872//metal ion binding;GO:0004091//carboxylesterase activity	GO:0006629//lipid metabolic process;GO:0019637//organophosphate metabolic process	gi|225446293|ref|XP_002269830.1|/2.30387e-86/PREDICTED: phospholipase A2 homolog 3 [Vitis vinifera]
GSVIVT01035231001	-1.43968	0.883087	K12134|1|1e-27|124|aly:ARALYDRAFT_904154|circadian clock associated 1;K12133|3|2e-27|123|ath:AT1G01060|LATE ELONGATED HYPOCOTYL	-	-	-	gi|297738146|emb|CBI27347.3|/0/unnamed protein product [Vitis vinifera]
GSVIVT01021149001	1.25967	0.848366	K01206|1|2e-25|115|ath:AT1G67830|alpha-L-fucosidase [EC:3.2.1.51];K00514|2|4e-25|114|rcu:RCOM_1428040|zeta-carotene desaturase [EC:1.3.5.6]	-	GO:0016787//hydrolase activity	GO:0044238//primary metabolic process	gi|225443543|ref|XP_002277279.1|/0/PREDICTED: GDSL esterase/lipase At5g45950-like isoform 1 [Vitis vinifera]
GSVIVT01017332001	-3.71158	0.874068	-	-	-	-	gi|297743460|emb|CBI36327.3|/0/unnamed protein product [Vitis vinifera]
GSVIVT01015284001	-2.56275	0.911592	-	-	-	-	gi|225445063|ref|XP_002280262.1|/4.37362e-70/PREDICTED: uncharacterized protein LOC100249186 [Vitis vinifera]
GSVIVT01008823001	4.59523	0.875537	K06627|1|0.0|949|vvi:100250590|cyclin A	GO:0043231//intracellular membrane-bounded organelle	-	GO:0009987//cellular process	gi|302141779|emb|CBI18982.3|/0/unnamed protein product [Vitis vinifera]
GSVIVT01037706001	1.20337	0.803902	K00609|1|0.0|675|vvi:100246977|aspartate carbamoyltransferase catalytic subunit [EC:2.1.3.2]	GO:0009532//plastid stroma	GO:0016743//carboxyl- or carbamoyltransferase activity;GO:0031406//carboxylic acid binding	GO:0019752//carboxylic acid metabolic process;GO:0019856//pyrimidine nucleobase biosynthetic process;GO:0009267//cellular response to starvation;GO:0006221//pyrimidine nucleotide biosynthetic process	gi|359494069|ref|XP_002277415.2|/0/PREDICTED: aspartate carbamoyltransferase 2, chloroplastic-like [Vitis vinifera]
GSVIVT01023906001	-1.49214	0.873774	K15015|1|6e-12|71.2|cre:CHLREDRAFT_196429|solute carrier family 32 (vesicular inhibitory amino acid transporter)	GO:0016020//membrane	-	-	gi|225428239|ref|XP_002282126.1|/0/PREDICTED: lysine histidine transporter-like 8-like [Vitis vinifera]
GSVIVT01025651001	-1.39373	0.880894	-	-	-	-	gi|359481353|ref|XP_003632609.1|/2.23069e-136/PREDICTED: uncharacterized protein LOC100854914 [Vitis vinifera]
GSVIVT01019407001	-3.86117	0.947104	K04079|1|1e-176|519|vvi:100265661|molecular chaperone HtpG	GO:0044424//intracellular part	GO:0005515//protein binding;GO:0032559	GO:0044267//cellular protein metabolic process;GO:0050896//response to stimulus	gi|302760227|ref|XP_002963536.1|/0/hypothetical protein SELMODRAFT_230177 [Selaginella moellendorffii]
GSVIVT01037005001	-2.44151	0.882318	K13449|1|6e-98|353|vvi:100258414|pathogenesis-related protein 1	-	-	-	gi|225429119|ref|XP_002273788.1|/6.62657e-97/PREDICTED: basic form of pathogenesis-related protein 1 [Vitis vinifera]
GSVIVT01011343001	-2.09384	0.910439	-	-	-	-	gi|225463848|ref|XP_002265262.1|/2.57542e-158/PREDICTED: uncharacterized protein LOC100244941 [Vitis vinifera]
GSVIVT01024050001	1.87298	0.868891	-	GO:0031224//intrinsic to membrane	-	GO:0009607//response to biotic stimulus	gi|225427981|ref|XP_002277548.1|/3.12418e-159/PREDICTED: pathogenesis-related protein 5 [Vitis vinifera]
GSVIVT01034107001	1.13369	0.814662	K03248|1|2e-157|553|vvi:100242668|translation initiation factor 3 subunit G	GO:0044424//intracellular part	GO:0046914//transition metal ion binding;GO:0008135//translation factor activity, nucleic acid binding	GO:0006412//translation	gi|225440472|ref|XP_002272361.1|/2.60149e-156/PREDICTED: eukaryotic translation initiation factor 3 subunit G isoform 1 [Vitis vinifera]
GSVIVT01035062001	-3.22728	0.809915	-	-	-	GO:0006950//response to stress	gi|225431846|ref|XP_002274309.1|/1.42757e-85/PREDICTED: major allergen Pru ar 1 [Vitis vinifera]
GSVIVT01007772001	-2.15819	0.802726	-	GO:0043231//intracellular membrane-bounded organelle	-	-	gi|225457062|ref|XP_002279841.1|/7.22136e-84/PREDICTED: uncharacterized protein LOC100253569 [Vitis vinifera]
GSVIVT01013704001	1.67016	0.810254	-	-	-	-	gi|297739374|emb|CBI29364.3|/3.87597e-95/unnamed protein product [Vitis vinifera]
GSVIVT01032361001	1.18641	0.862923	K11294|1|1e-37|155|smo:SELMODRAFT_15428|nucleolin;K14411|2|3e-24|111|vcn:VOLCADRAFT_107445|RNA-binding protein Musashi	GO:0044424//intracellular part	GO:0005488//binding	-	gi|225452270|ref|XP_002270233.1|/6.60858e-140/PREDICTED: 31 kDa ribonucleoprotein, chloroplastic-like [Vitis vinifera]
GSVIVT01008670001	-4.62581	0.945974	K00030|1|2e-155|547|vvi:100242228|isocitrate dehydrogenase (NAD+) [EC:1.1.1.41];K09588|2|5e-73|273|pop:POPTR_656234|cytochrome P450, family 90, subfamily A, polypeptide 1 [EC:1.14.-.-]	-	GO:0016709//oxidoreductase activity, acting on paired donors, with incorporation or reduction of molecular oxygen, NAD(P)H as one donor, and incorporation of one atom of oxygen;GO:0005506//iron ion binding	GO:0008152//metabolic process	gi|302141660|emb|CBI18863.3|/0/unnamed protein product [Vitis vinifera]
GSVIVT01025005001	2.95764	0.917876	K11254|1|4e-20|95.5|mtr:MTR_2g096100|histone H4	GO:0000785//chromatin;GO:0031090//organelle membrane;GO:0009536//plastid	GO:0003676//nucleic acid binding	GO:0034728//nucleosome organization	gi|470116831|ref|XP_004294578.1|/4.82515e-19/PREDICTED: histone H4-like [Fragaria vesca subsp. vesca]
GSVIVT01037973001	4.02752	0.913898	K12192|1|8e-71|265|osa:4348891|charged multivesicular body protein 2B	GO:0010008//endosome membrane	-	GO:0006810//transport	gi|296089248|emb|CBI39020.3|/9.82774e-99/unnamed protein product [Vitis vinifera]
GSVIVT01035385001	-3.21773	0.823862	-	GO:0043231//intracellular membrane-bounded organelle	GO:0001071//nucleic acid binding transcription factor activity;GO:0003677//DNA binding	GO:0009642//response to light intensity;GO:0000302//response to reactive oxygen species;GO:0009743//response to carbohydrate stimulus;GO:0009408//response to heat;GO:0006351//transcription, DNA-dependent;GO:0006986//response to unfolded protein	gi|296081644|emb|CBI20649.3|/8.03858e-166/unnamed protein product [Vitis vinifera]
GSVIVT01020388001	-3.80476	0.893621	-	-	GO:0003676//nucleic acid binding	-	gi|359494559|ref|XP_002265838.2|/2.47805e-167/PREDICTED: NAC domain-containing protein 42-like [Vitis vinifera]
GSVIVT01015377001	1.00857	0.8051	K03100|1|2e-158|556|vvi:100252527|signal peptidase I [EC:3.4.21.89]	GO:0031967;GO:0031224//intrinsic to membrane;GO:0009534//chloroplast thylakoid	GO:0070011//peptidase activity, acting on L-amino acid peptides	GO:0009668;GO:0019538//protein metabolic process	gi|225445220|ref|XP_002284378.1|/3.12418e-157/PREDICTED: chloroplast processing peptidase [Vitis vinifera]
GSVIVT01010580001	-3.8181	0.826507	K13232|1|0.0|726|vvi:100241891|stilbene synthase [EC:2.3.1.95]	-	-	-	gi|359490330|ref|XP_003634072.1|/0/PREDICTED: stilbene synthase 4-like [Vitis vinifera]
GSVIVT01009849001	-3.92914	0.838442	K11818|1|9e-52|202|aly:ARALYDRAFT_913321|cytochrome P450, family 83, subfamily B, polypeptide 1 [EC:1.14.-.-];K00517|5|1e-44|178|ath:AT3G26210|[EC:1.14.-.-]	-	GO:0016709//oxidoreductase activity, acting on paired donors, with incorporation or reduction of molecular oxygen, NAD(P)H as one donor, and incorporation of one atom of oxygen;GO:0005506//iron ion binding	GO:0008152//metabolic process	gi|302142615|emb|CBI19818.3|/3.99945e-176/unnamed protein product [Vitis vinifera]
GSVIVT01029611001	-3.19688	0.851056	K13420|1|2e-35|148|sbi:SORBI_06g028760|LRR receptor-like serine/threonine-protein kinase FLS2 [EC:2.7.11.1]	-	-	-	gi|359483171|ref|XP_002262961.2|/3.73191e-124/PREDICTED: probable LRR receptor-like serine/threonine-protein kinase At1g34110-like [Vitis vinifera]
GSVIVT01030258001	-3.10384	0.902098	K13424|1|1e-144|511|vvi:100243352|WRKY transcription factor 33	-	-	-	gi|225439574|ref|XP_002264974.1|/0/PREDICTED: probable WRKY transcription factor 33-like [Vitis vinifera]
GSVIVT01014074001	1.0998	0.859239	K08912|1|3e-98|356|vvi:100245214|light-harvesting complex II chlorophyll a/b binding protein 1	-	-	-	gi|225461832|ref|XP_002285646.1|/4.28782e-97/PREDICTED: chlorophyll a-b binding protein 40, chloroplastic [Vitis vinifera]
GSVIVT01010574001	-5.0048	0.886116	K13232|1|6e-178|621|vvi:100241891|stilbene synthase [EC:2.3.1.95]	-	-	-	gi|359490317|ref|XP_003634067.1|/5.71179e-180/PREDICTED: stilbene synthase 4-like [Vitis vinifera]
GSVIVT01027142001	3.30274	0.883562	K15406|1|2e-94|344|ath:AT5G37300|wax-ester synthase / diacylglycerol O-acyltransferase [EC:2.3.1.75 2.3.1.20]	-	-	-	gi|297745464|emb|CBI40544.3|/0/unnamed protein product [Vitis vinifera]
GSVIVT01001082001	1.05279	0.844545	-	GO:0031410//cytoplasmic vesicle;GO:0031090//organelle membrane;GO:0043231//intracellular membrane-bounded organelle	-	-	gi|225425256|ref|XP_002269974.1|/3.30847e-116/PREDICTED: heme-binding protein 2-like [Vitis vinifera]
GSVIVT01022254001	1.06378	0.807383	K15111|1|8e-173|605|vvi:100264695|solute carrier family 25 (mitochondrial S-adenosylmethionine transporter), member 26	GO:0031224//intrinsic to membrane;GO:0019866//organelle inner membrane;GO:0009526//plastid envelope	GO:0005337//nucleoside transmembrane transporter activity	GO:0015860//purine nucleoside transmembrane transport;GO:0009657//plastid organization;GO:0046907//intracellular transport	gi|296082525|emb|CBI21530.3|/0/unnamed protein product [Vitis vinifera]
GSVIVT01024469001	1.35897	0.835797	-	GO:0009527//plastid outer membrane	GO:0017111//nucleoside-triphosphatase activity;GO:0008320//protein transmembrane transporter activity;GO:0032561//guanyl ribonucleotide binding	GO:0006605//protein targeting;GO:0009207;GO:0051644	gi|225454878|ref|XP_002278775.1|/2.17777e-172/PREDICTED: translocase of chloroplast 34, chloroplastic [Vitis vinifera]
GSVIVT01027398001	1.13993	0.857453	-	GO:0009528//plastid inner membrane	-	-	gi|225453555|ref|XP_002262754.1|/2.42747e-121/PREDICTED: uncharacterized protein LOC100250645 [Vitis vinifera]
GSVIVT01021031001	3.14051	0.816334	K10400|1|4e-108|391|vvi:100255624|kinesin family member 15	GO:0043229//intracellular organelle;GO:0044444//cytoplasmic part	GO:0003777//microtubule motor activity;GO:0000166//nucleotide binding	GO:0000911//cytokinesis by cell plate formation;GO:0032502//developmental process	gi|298205235|emb|CBI17294.3|/0/unnamed protein product [Vitis vinifera]
GSVIVT01010781001	-1.84441	0.831819	-	-	-	-	gi|297743798|emb|CBI36681.3|/0/unnamed protein product [Vitis vinifera]
GSVIVT01023899001	-1.97918	0.830576	K04733|1|9e-45|179|smo:SELMODRAFT_159261|interleukin-1 receptor-associated kinase 4 [EC:2.7.11.1];K13430|3|8e-43|173|zma:100283091|serine/threonine-protein kinase PBS1 [EC:2.7.11.1]	-	GO:0004672//protein kinase activity;GO:0000166//nucleotide binding	-	gi|297744499|emb|CBI37761.3|/0/unnamed protein product [Vitis vinifera]
GSVIVT01033499001	1.01002	0.828654	-	GO:0009536//plastid	-	-	gi|225441447|ref|XP_002279430.1|/7.39456e-146/PREDICTED: probable plastid-lipid-associated protein 13, chloroplastic isoform 1 [Vitis vinifera]
GSVIVT01025358001	1.83599	0.889416	K00208|1|0.0|697|vvi:100241680|enoyl-[acyl-carrier protein] reductase I [EC:1.3.1.9]	-	GO:0003824//catalytic activity	GO:0008152//metabolic process	gi|297746397|emb|CBI16453.3|/0/unnamed protein product [Vitis vinifera]
GSVIVT01032230001	-3.40156	0.864144	K09843|1|1e-64|245|rcu:RCOM_0814150|(+)-abscisic acid 8'-hydroxylase [EC:1.14.13.93]	-	GO:0016709//oxidoreductase activity, acting on paired donors, with incorporation or reduction of molecular oxygen, NAD(P)H as one donor, and incorporation of one atom of oxygen;GO:0005506//iron ion binding	GO:0008152//metabolic process	gi|297736007|emb|CBI24045.3|/0/unnamed protein product [Vitis vinifera]
GSVIVT01032619001	1.78121	0.828383	K01859|1|5e-130|462|vvi:100233078|chalcone isomerase [EC:5.5.1.6]	-	GO:0016872//intramolecular lyase activity	GO:0009699//phenylpropanoid biosynthetic process;GO:0006575//cellular modified amino acid metabolic process	gi|158514257|sp|A5ANT9.1|CFI2_VITVI/5.92828e-129/RecName: Full=Chalcone--flavonone isomerase 2; Short=Chalcone isomerase 2
GSVIVT01030687001	-1.11795	0.839052	-	-	GO:0003824//catalytic activity	-	gi|359488225|ref|XP_002263589.2|/1.93808e-102/PREDICTED: nudix hydrolase 18, mitochondrial-like [Vitis vinifera]
GSVIVT01019325001	1.14636	0.828383	K15223|1|5e-17|86.7|mtr:MTR_5g018010|upstream activation factor subunit UAF30	GO:0043231//intracellular membrane-bounded organelle;GO:0044444//cytoplasmic part	-	-	gi|225436221|ref|XP_002270166.1|/1.21043e-46/PREDICTED: upstream activation factor subunit spp27 [Vitis vinifera]
GSVIVT01024825001	4.3312	0.94941	K07375|1|3e-107|386|zma:100381281|tubulin beta	-	-	-	gi|297745967|emb|CBI16023.3|/2.31176e-129/unnamed protein product [Vitis vinifera]
GSVIVT01018374001	1.20108	0.813577	-	GO:0009526//plastid envelope;GO:0031090//organelle membrane	-	-	gi|225453254|ref|XP_002265990.1|/0/PREDICTED: uncharacterized protein LOC100256535 [Vitis vinifera]
GSVIVT01029843001	2.60097	0.880804	K07760|1|1e-143|508|ath:AT3G54180|cyclin-dependent kinase [EC:2.7.11.22];K00924|2|4e-115|413|ath:AT1G20930|[EC:2.7.1.-];K02206|5|4e-97|353|osa:4331415|cyclin-dependent kinase 2 [EC:2.7.11.22]	GO:0043234//protein complex	GO:0005515//protein binding;GO:0004674//protein serine/threonine kinase activity;GO:0032559	GO:0006464//cellular protein modification process;GO:0000087//M phase of mitotic cell cycle	gi|296085816|emb|CBI31140.3|/0/unnamed protein product [Vitis vinifera]
GSVIVT01009293001	2.44205	0.813373	K09285|1|4e-99|359|vvi:100252316|AP2-like factor, ANT lineage	GO:0043231//intracellular membrane-bounded organelle	GO:0003676//nucleic acid binding;GO:0001071//nucleic acid binding transcription factor activity	GO:0006351//transcription, DNA-dependent;GO:0008283//cell proliferation;GO:0009653//anatomical structure morphogenesis;GO:0019953//sexual reproduction	gi|302142157|emb|CBI19360.3|/3.76215e-137/unnamed protein product [Vitis vinifera]
GSVIVT01011947001	-1.13075	0.830485	K09287|1|2e-76|256|vvi:100262843|RAV-like factor	-	-	GO:0006351//transcription, DNA-dependent	gi|297737861|emb|CBI27062.3|/2.3975e-110/unnamed protein product [Vitis vinifera]
GSVIVT01035515001	6.18719	0.960373	-	-	-	-	-
GSVIVT01024788001	1.5529	0.884647	K02926|1|2e-35|147|pop:POPTR_802304|large subunit ribosomal protein L4	GO:0000315//organellar large ribosomal subunit;GO:0009532//plastid stroma;GO:0009534//chloroplast thylakoid	GO:0008187//poly-pyrimidine tract binding;GO:0005198//structural molecule activity	GO:0010467//gene expression	gi|147856052|emb|CAN78612.1|/3.28797e-46/hypothetical protein VITISV_028922 [Vitis vinifera]
GSVIVT01015851001	-1.89238	0.872237	-	-	-	-	gi|225464786|ref|XP_002266806.1|/3.12216e-67/PREDICTED: uncharacterized protein LOC100241630 [Vitis vinifera]
GSVIVT01031006001	1.15108	0.824088	K08150|1|9e-61|233|vvi:100268023|MFS transporter, SP family, solute carrier family 2 (myo-inositol transporter), member 13;K08145|2|2e-59|228|smo:SELMODRAFT_82622|MFS transporter, SP family, solute carrier family 2 (facilitated glucose transporter), member 8	GO:0009526//plastid envelope;GO:0031224//intrinsic to membrane	GO:0022891//substrate-specific transmembrane transporter activity	GO:0006810//transport	gi|51574116|gb|AAU07980.1|/0/plastid hexose transporter [Vitis vinifera]
GSVIVT01032454001	1.29014	0.874361	K02935|1|9e-57|218|vvi:100257626|large subunit ribosomal protein L7/L12	GO:0005840//ribosome;GO:0009532//plastid stroma;GO:0009534//chloroplast thylakoid	GO:0005488//binding	-	gi|296087651|emb|CBI34907.3|/1.33808e-61/unnamed protein product [Vitis vinifera]
GSVIVT01007614001	-1.01496	0.839052	K00517|1|2e-72|271|aly:ARALYDRAFT_682995|[EC:1.14.-.-]	-	-	-	gi|297733675|emb|CBI14922.3|/0/unnamed protein product [Vitis vinifera]
GSVIVT01013694001	7.29384	0.921696	K00423|1|3e-61|235|rcu:RCOM_0657480|L-ascorbate oxidase [EC:1.10.3.3]	GO:0005576//extracellular region	GO:0046914//transition metal ion binding;GO:0016682//oxidoreductase activity, acting on diphenols and related substances as donors, oxygen as acceptor	GO:0009808//lignin metabolic process	gi|225463097|ref|XP_002263871.1|/0/PREDICTED: putative laccase-9 [Vitis vinifera]
GSVIVT01023002001	3.1162	0.864619	-	-	GO:0046914//transition metal ion binding	-	gi|225448071|ref|XP_002275987.1|/2.61664e-59/PREDICTED: basic blue protein isoform 1 [Vitis vinifera]
GSVIVT01000230001	6.3104	0.986166	-	-	-	GO:0006952//defense response;GO:0001906//cell killing	gi|359480892|ref|XP_002272913.2|/1.407e-30/PREDICTED: defensin-like protein 6-like [Vitis vinifera]
GSVIVT01034173001	3.93236	0.806885	K10403|1|0.0|1214|vvi:100261269|kinesin family member 22	GO:0009536//plastid;GO:0015630//microtubule cytoskeleton	GO:0003676//nucleic acid binding;GO:0003774//motor activity;GO:0032559	GO:0006259//DNA metabolic process;GO:0007017//microtubule-based process	gi|225440360|ref|XP_002270444.1|/0/PREDICTED: kinesin-like protein KIF22-B [Vitis vinifera]
GSVIVT01032968001	2.60557	0.918419	K00660|1|0.0|692|vvi:100232843|chalcone synthase [EC:2.3.1.74]	-	GO:0016747//transferase activity, transferring acyl groups other than amino-acyl groups	GO:0009699//phenylpropanoid biosynthetic process	gi|225451639|ref|XP_002276921.1|/0/PREDICTED: LOW QUALITY PROTEIN: chalcone synthase [Vitis vinifera]
GSVIVT01034195001	-1.82149	0.902075	K03283|1|5e-86|315|vvi:100259551|heat shock 70kDa protein 1/8	-	GO:0016491//oxidoreductase activity;GO:0000166//nucleotide binding	-	gi|297740392|emb|CBI30574.3|/6.46677e-90/unnamed protein product [Vitis vinifera]
GSVIVT01014443001	1.167	0.858131	K10418|1|4e-15|78.6|ota:Ot01g00570|dynein light chain LC8-type	GO:0015630//microtubule cytoskeleton	GO:0003774//motor activity	GO:0009987//cellular process	gi|225461306|ref|XP_002281713.1|/9.63508e-48/PREDICTED: dynein light chain LC6, flagellar outer arm [Vitis vinifera]
GSVIVT01008070001	3.44757	0.828405	K13418|1|6e-100|363|pop:POPTR_913861|somatic embryogenesis receptor kinase 1 [EC:2.7.10.1 2.7.11.1]	GO:0031224//intrinsic to membrane	GO:0004702//receptor signaling protein serine/threonine kinase activity;GO:0032559	GO:0006464//cellular protein modification process	gi|225456649|ref|XP_002270994.1|/0/PREDICTED: LRR receptor-like serine/threonine-protein kinase FEI 1 [Vitis vinifera]
GSVIVT01019660001	-1.08106	0.814051	K13535|1|9e-06|50.4|gmx:100789925|cardiolipin-specific phospholipase [EC:3.1.1.-]	GO:0030312//external encapsulating structure	GO:0003824//catalytic activity	-	gi|225426578|ref|XP_002279898.1|/0/PREDICTED: putative aminoacrylate hydrolase RutD [Vitis vinifera]
GSVIVT01027441001	1.00184	0.824902	K11294|1|2e-18|91.3|smo:SELMODRAFT_15428|nucleolin;K13126|3|1e-15|82.0|olu:OSTLU_50098|polyadenylate-binding protein	GO:0009526//plastid envelope;GO:0009532//plastid stroma	GO:0003676//nucleic acid binding	-	gi|296089011|emb|CBI38714.3|/4.77855e-89/unnamed protein product [Vitis vinifera]
GSVIVT01009090001	2.07717	0.837628	-	-	GO:0046914//transition metal ion binding	-	gi|302142003|emb|CBI19206.3|/7.46811e-73/unnamed protein product [Vitis vinifera]
GSVIVT01020734001	-3.95825	0.82393	K16040|1|0.0|683|vvi:100233030|trans-resveratrol di-O-methyltransferase [EC:2.1.1.240];K13230|2|3e-59|227|zma:100147731|2,4,7-trihydroxy-1,4-benzoxazin-3-one-glucoside 7-O-methyltransferase [EC:2.1.1.241];K05279|3|7e-43|172|sbi:SORBI_07g003860|flavonol 3-O-methyltransferase [EC:2.1.1.76]	-	-	-	gi|403399690|sp|B6VJS4.2|ROMT_VITVI/0/RecName: Full=Trans-resveratrol di-O-methyltransferase; AltName: Full=Resveratrol O-methyltransferase; Short=ROMT; Short=VvROMT
GSVIVT01018938001	1.12292	0.826235	K01792|1|7e-102|369|ppp:PHYPADRAFT_155277|glucose-6-phosphate 1-epimerase [EC:5.1.3.15]	GO:0009532//plastid stroma;GO:0005576//extracellular region	GO:0005488//binding;GO:0016857//racemase and epimerase activity, acting on carbohydrates and derivatives	GO:0019318//hexose metabolic process	gi|225430722|ref|XP_002265594.1|/6.90609e-178/PREDICTED: putative glucose-6-phosphate 1-epimerase [Vitis vinifera]
GSVIVT01017252001	1.18692	0.823025	-	-	-	-	gi|225442855|ref|XP_002285376.1|/2.41422e-64/PREDICTED: uncharacterized RNA-binding protein C17H9.04c [Vitis vinifera]
GSVIVT01024057001	-1.94186	0.902482	K03686|1|1e-12|69.7|zma:100191825|molecular chaperone DnaJ;K09527|4|5e-11|64.7|cre:CHLREDRAFT_146571|DnaJ homolog subfamily C member 7	-	GO:0005515//protein binding	GO:0044267//cellular protein metabolic process	gi|297744638|emb|CBI37900.3|/8.54844e-74/unnamed protein product [Vitis vinifera]
GSVIVT01028346001	1.20654	0.83469	-	GO:0009536//plastid	-	GO:0009725//response to hormone stimulus	gi|297744156|emb|CBI37126.3|/5.42637e-177/unnamed protein product [Vitis vinifera]
GSVIVT01029225001	6.72746	0.891948	K13289|1|5e-120|429|mtr:MTR_4g021500|cathepsin A (carboxypeptidase C) [EC:3.4.16.5];K09756|3|7e-114|409|ath:AT5G09640|serine carboxypeptidase-like 19 [EC:3.4.16.- 2.3.1.91]	-	GO:0004180//carboxypeptidase activity	GO:0019538//protein metabolic process	gi|297735407|emb|CBI17847.3|/0/unnamed protein product [Vitis vinifera]
GSVIVT01000266001	1.00896	0.802116	K09495|1|0.0|1090|vvi:100264926|T-complex protein 1 subunit gamma	GO:0044424//intracellular part	GO:0005515//protein binding;GO:0032559	GO:0044267//cellular protein metabolic process	gi|225463163|ref|XP_002268799.1|/0/PREDICTED: T-complex protein 1 subunit gamma [Vitis vinifera]
GSVIVT01018607001	-1.60054	0.80189	K02355|1|1e-28|125|vvi:100257414|elongation factor G;K01051|2|9e-20|95.5|aly:ARALYDRAFT_892433|pectinesterase [EC:3.1.1.11]	-	GO:0004091//carboxylesterase activity;GO:0030234//enzyme regulator activity	-	gi|225466067|ref|XP_002264101.1|/3.09865e-109/PREDICTED: 21 kDa protein-like [Vitis vinifera]
GSVIVT01004003001	1.41298	0.803653	K01653|1|0.0|913|vvi:100256605|acetolactate synthase I/III small subunit [EC:2.2.1.6]	GO:0009536//plastid	GO:0031406//carboxylic acid binding;GO:0016744	GO:0008652//cellular amino acid biosynthetic process	gi|359495876|ref|XP_002266924.2|/0/PREDICTED: uncharacterized protein LOC100256605 [Vitis vinifera]
GSVIVT01020241001	3.72195	0.822166	-	-	-	-	gi|296086559|emb|CBI32148.3|/0/unnamed protein product [Vitis vinifera]
GSVIVT01014682001	-3.13529	0.922442	K01728|1|0.0|819|vvi:100249765|pectate lyase [EC:4.2.2.2]	-	GO:0016837	-	gi|225461920|ref|XP_002265729.1|/0/PREDICTED: probable pectate lyase 15-like [Vitis vinifera]
GSVIVT01000129001	-2.80963	0.881166	-	-	-	-	gi|225438986|ref|XP_002279570.1|/5.88996e-86/PREDICTED: zinc finger protein ZAT10-like [Vitis vinifera]
GSVIVT01035382001	4.4203	0.836362	-	-	-	-	gi|296081641|emb|CBI20646.3|/0/unnamed protein product [Vitis vinifera]
GSVIVT01009576001	-1.53669	0.873909	K13457|1|1e-26|120|osa:4342596|disease resistance protein RPM1;K03013|5|2e-22|105|vvi:100258335|DNA-directed RNA polymerases I, II, and III subunit RPABC1	-	GO:0000166//nucleotide binding	-	gi|302142379|emb|CBI19582.3|/0/unnamed protein product [Vitis vinifera]
GSVIVT01035640001	2.03848	0.804828	K09873|1|3e-85|313|ath:AT2G25810|aquaporin TIP	GO:0000325//plant-type vacuole;GO:0031224//intrinsic to membrane	GO:0005372//water transmembrane transporter activity	GO:0006810//transport	gi|225429963|ref|XP_002283964.1|/2.52838e-161/PREDICTED: aquaporin TIP4-1-like [Vitis vinifera]
GSVIVT01026348001	2.04513	0.851395	K00514|1|3e-17|88.2|rcu:RCOM_1428040|zeta-carotene desaturase [EC:1.3.5.6];K01206|2|4e-17|87.8|aly:ARALYDRAFT_475890|alpha-L-fucosidase [EC:3.2.1.51]	-	GO:0016787//hydrolase activity	GO:0044238//primary metabolic process	gi|225430643|ref|XP_002268826.1|/0/PREDICTED: GDSL esterase/lipase At5g33370-like [Vitis vinifera]
GSVIVT01031464001	1.60228	0.898594	K09873|1|8e-100|362|ath:AT4G01470|aquaporin TIP	GO:0031224//intrinsic to membrane	-	GO:0006810//transport	gi|225436454|ref|XP_002274538.1|/3.77788e-135/PREDICTED: aquaporin TIP1-1 isoform 1 [Vitis vinifera]
GSVIVT01033188001	-1.13017	0.804828	K13425|1|1e-25|115|pop:POPTR_755334|WRKY transcription factor 22;K13426|4|2e-23|108|rcu:RCOM_1689100|WRKY transcription factor 29	-	-	-	gi|296083797|emb|CBI24014.3|/2.74806e-138/unnamed protein product [Vitis vinifera]
GSVIVT01037887001	3.72933	0.807225	-	GO:0030312//external encapsulating structure	-	GO:0006950//response to stress	gi|225429327|ref|XP_002271730.1|/1.90161e-46/PREDICTED: snakin-1 [Vitis vinifera]
GSVIVT01025653001	-3.025	0.816583	K08472|1|0.0|663|aly:ARALYDRAFT_315221|mlo protein	-	-	-	gi|193878340|gb|ACF25910.1|/0/MLO-like protein 3 [Vitis vinifera]
GSVIVT01021426001	3.25195	0.829717	K02541|1|0.0|1466|vvi:100253704|minichromosome maintenance protein 3	GO:0043231//intracellular membrane-bounded organelle	GO:0003676//nucleic acid binding;GO:0016462//pyrophosphatase activity;GO:0032559	GO:0006259//DNA metabolic process	gi|297740670|emb|CBI30852.3|/0/unnamed protein product [Vitis vinifera]
GSVIVT01034561001	4.08581	0.844432	-	-	-	-	gi|296081203|emb|CBI18229.3|/1.42254e-89/unnamed protein product [Vitis vinifera]
GSVIVT01021112001	-1.2075	0.848931	K09510|1|8e-134|475|rcu:RCOM_1673240|DnaJ homolog subfamily B member 4	-	GO:0005515//protein binding	GO:0044267//cellular protein metabolic process	gi|297740428|emb|CBI30610.3|/1.22855e-154/unnamed protein product [Vitis vinifera]
GSVIVT01027715001	-1.11761	0.830915	K00770|1|2e-26|117|sbi:SORBI_08g017750|1,4-beta-D-xylan synthase [EC:2.4.2.24];K10999|2|4e-26|116|vvi:100241197|cellulose synthase A [EC:2.4.1.12]	-	GO:0016740//transferase activity	-	gi|359477703|ref|XP_002280696.2|/1.53737e-124/PREDICTED: cellulose synthase-like protein G2-like [Vitis vinifera]
GSVIVT01037882001	1.14893	0.830259	-	-	-	-	gi|296083089|emb|CBI22493.3|/7.84536e-67/unnamed protein product [Vitis vinifera]
GSVIVT01017173001	1.44025	0.80684	K04124|1|0.0|730|vvi:100265167|gibberellin 3-beta-dioxygenase [EC:1.14.11.15]	-	GO:0016701//oxidoreductase activity, acting on single donors with incorporation of molecular oxygen	GO:0008152//metabolic process	gi|359482967|ref|XP_002284963.2|/0/PREDICTED: gibberellin 3-beta-dioxygenase 1-like [Vitis vinifera]
GSVIVT01036586001	2.79067	0.851621	-	GO:0043231//intracellular membrane-bounded organelle	-	-	gi|225464037|ref|XP_002267371.1|/0/PREDICTED: auxin-induced protein 5NG4 isoform 1 [Vitis vinifera]
GSVIVT01038540001	3.45912	0.830395	K13449|1|2e-70|263|vvi:100258414|pathogenesis-related protein 1	-	-	-	gi|225429250|ref|XP_002265050.1|/2.26586e-95/PREDICTED: basic form of pathogenesis-related protein 1 [Vitis vinifera]
GSVIVT01033749001	1.19201	0.829468	K10576|1|1e-57|223|vvi:100250088|ubiquitin-conjugating enzyme E2 H [EC:6.3.2.19];K13415|2|1e-53|209|ath:AT4G39400|protein brassinosteroid insensitive 1 [EC:2.7.10.1 2.7.11.1]	GO:0016020//membrane	GO:0016301//kinase activity;GO:0000166//nucleotide binding	GO:0009987//cellular process	gi|297740041|emb|CBI30223.3|/0/unnamed protein product [Vitis vinifera]
GSVIVT01032083001	5.12039	0.825896	-	-	-	-	gi|225450145|ref|XP_002279621.1|/2.42459e-172/PREDICTED: uncharacterized protein LOC100258531 [Vitis vinifera]
GSVIVT01016413001	-1.38331	0.858877	K13993|1|4e-37|152|vvi:100263355|HSP20 family protein	-	-	-	gi|296086129|emb|CBI31570.3|/1.3737e-86/unnamed protein product [Vitis vinifera]
GSVIVT01000023001	-1.87266	0.864686	-	-	-	-	gi|225451013|ref|XP_002284868.1|/0/PREDICTED: basic 7S globulin-like [Vitis vinifera]
GSVIVT01031526001	1.02336	0.850332	K04077|1|2e-133|474|smo:SELMODRAFT_165043|chaperonin GroEL	GO:0009536//plastid	GO:0005515//protein binding;GO:0032559	GO:0006457//protein folding	gi|297734943|emb|CBI17177.3|/0/unnamed protein product [Vitis vinifera]
GSVIVT01003157001	1.22428	0.83964	K13068|1|1e-35|148|aly:ARALYDRAFT_479675|sinapate 1-glucosyltransferase [EC:2.4.1.120];K13691|3|1e-23|108|mtr:MTR_8g088560|pathogen-inducible salicylic acid glucosyltransferase [EC:2.4.1.-];K13692|4|3e-21|100|vvi:100252177|UDP-glucose:(indol-3-yl)acetate beta-D-glucosyltransferase [EC:2.4.1.121]	-	GO:0035251//UDP-glucosyltransferase activity	-	gi|296090445|emb|CBI40264.3|/5.08516e-133/unnamed protein product [Vitis vinifera]
GSVIVT01010581001	-3.36979	0.884556	K13232|1|0.0|630|vvi:100241891|stilbene synthase [EC:2.3.1.95]	-	-	-	gi|393718017|gb|AFN21545.1|/9.74283e-180/stilbene synthase [Vitis pseudoreticulata]
GSVIVT01021797001	-4.60281	0.809869	K13448|1|4e-52|202|rcu:RCOM_0910780|calcium-binding protein CML	-	GO:0046872//metal ion binding;GO:0016628//oxidoreductase activity, acting on the CH-CH group of donors, NAD or NADP as acceptor	GO:0008152//metabolic process	gi|225451332|ref|XP_002274499.1|/3.99242e-70/PREDICTED: calmodulin-like protein 11 [Vitis vinifera]
GSVIVT01033678001	-1.14953	0.832248	-	-	GO:0005488//binding	-	gi|297739982|emb|CBI30164.3|/6.32019e-104/unnamed protein product [Vitis vinifera]
GSVIVT01001657001	-4.3262	0.930173	-	-	-	-	gi|296088099|emb|CBI35488.3|/8.96475e-15/unnamed protein product [Vitis vinifera]
GSVIVT01013916001	-4.43611	0.921922	K09286|1|4e-115|412|vvi:100254616|EREBP-like factor	GO:0043231//intracellular membrane-bounded organelle	GO:0003676//nucleic acid binding;GO:0001071//nucleic acid binding transcription factor activity	GO:0006351//transcription, DNA-dependent	gi|225455026|ref|XP_002281912.1|/3.94162e-133/PREDICTED: ethylene-responsive transcription factor 5 [Vitis vinifera]
GSVIVT01002634001	1.34537	0.800805	-	-	-	-	gi|296084740|emb|CBI25884.3|/0/unnamed protein product [Vitis vinifera]
GSVIVT01031065001	-2.56331	0.872214	K14493|1|3e-38|157|ppp:PHYPADRAFT_118478|gibberellin receptor GID1 [EC:3.-.-.-]	-	-	-	gi|296087294|emb|CBI33668.3|/0/unnamed protein product [Vitis vinifera]
