# Supplementary material
Source: Frontiers journal article supplement (https://www.frontiersin.org/articles/234230)
Supplement: Data_Sheet_7.xls [file Data_Sheet_7.xls]

## Sheet: Supplement 7-W-vs-R.GeneDiffExp
GeneID	log2Ratio(R/W)	Probability	KEGG Orthology	GO Component	GO Function	GO Process	Blast nr
GSVIVT01000007001	1.92252	0.802011	K01206|1|7e-82|302|ath:AT1G67830|alpha-L-fucosidase [EC:3.2.1.51];K00514|3|6e-23|107|rcu:RCOM_1428040|zeta-carotene desaturase [EC:1.3.5.6]	-	GO:0016787//hydrolase activity	GO:0044238//primary metabolic process	gi|225451036|ref|XP_002284922.1|/0/PREDICTED: GDSL esterase/lipase At1g54790 [Vitis vinifera]
GSVIVT01029411001	-1.79106	0.843036	-	GO:0044464//cell part	-	-	gi|29421118|dbj|BAC66694.1|/1.52282e-121/expansin [Vitis labrusca x Vitis vinifera]
GSVIVT01008617001	-2.11064	0.857375	-	-	-	-	gi|297734484|emb|CBI15731.3|/0/unnamed protein product [Vitis vinifera]
GSVIVT01004397001	1.85793	0.844334	-	-	-	-	gi|302141653|emb|CBI18823.3|/0/unnamed protein product [Vitis vinifera]
GSVIVT01011407001	-2.27578	0.862997	K09874|1|3e-83|306|osa:4340558|aquaporin NIP	GO:0031224//intrinsic to membrane	-	GO:0006810//transport	gi|359489000|ref|XP_002278054.2|/1.25389e-157/PREDICTED: aquaporin NIP2-1-like [Vitis vinifera]
GSVIVT01036462001	1.73299	0.803028	-	-	-	-	gi|298204388|emb|CBI16868.3|/1.94337e-60/unnamed protein product [Vitis vinifera]
GSVIVT01025462001	1.42708	0.820956	K07374|1|0.0|670|vvi:100260286|tubulin alpha	GO:0043234//protein complex;GO:0015630//microtubule cytoskeleton;GO:0030312//external encapsulating structure;GO:0044444//cytoplasmic part	GO:0017111//nucleoside-triphosphatase activity;GO:0032561//guanyl ribonucleotide binding	GO:0010038//response to metal ion;GO:0043623//cellular protein complex assembly;GO:0009207;GO:0007017//microtubule-based process	gi|297746478|emb|CBI16534.3|/0/unnamed protein product [Vitis vinifera]
GSVIVT01026502001	-3.95593	0.863214	K11717|1|4e-10|64.7|gmx:100799615|cysteine desulfurase / selenocysteine lyase [EC:2.8.1.7 4.4.1.16]	-	GO:0048037//cofactor binding;GO:0016740//transferase activity	-	gi|296088560|emb|CBI37551.3|/0/unnamed protein product [Vitis vinifera]
GSVIVT01021613001	2.86739	0.821907	-	GO:0016020//membrane	-	GO:0010101	gi|359483669|ref|XP_002274947.2|/0/PREDICTED: uncharacterized protein LOC100253161 [Vitis vinifera]
GSVIVT01034422001	1.74666	0.852444	K01757|1|4e-51|200|ath:AT1G74000|strictosidine synthase [EC:4.3.3.2]	-	GO:0016843	GO:0008152//metabolic process	gi|225463685|ref|XP_002273580.1|/0/PREDICTED: strictosidine synthase [Vitis vinifera]
GSVIVT01036599001	3.29687	0.854585	K11821|1|2e-67|254|aly:ARALYDRAFT_895283|desulfoglucosinolate sulfotransferase A/B/C [EC:2.8.2.-];K01014|3|8e-09|59.7|olu:OSTLU_32551|aryl sulfotransferase [EC:2.8.2.1]	-	GO:0008146//sulfotransferase activity	GO:0009719;GO:0031407//oxylipin metabolic process	gi|225464021|ref|XP_002265863.1|/0/PREDICTED: flavonol sulfotransferase-like [Vitis vinifera]
GSVIVT01001405001	2.59834	0.885489	K12124|1|0.0|882|vvi:100254197|GIGANTEA	-	-	-	gi|225470820|ref|XP_002264755.1|/0/PREDICTED: protein GIGANTEA-like [Vitis vinifera]
GSVIVT01030556001	-1.51212	0.814295	K13348|1|3e-21|101|cme:CMS031C|protein Mpv17	GO:0031224//intrinsic to membrane;GO:0009536//plastid	-	-	gi|297739256|emb|CBI28907.3|/0/unnamed protein product [Vitis vinifera]
GSVIVT01024760001	1.67826	0.808845	K04733|1|3e-65|248|smo:SELMODRAFT_159261|interleukin-1 receptor-associated kinase 4 [EC:2.7.11.1];K13416|3|7e-61|233|ath:AT4G33430|brassinosteroid insensitive 1-associated receptor kinase 1 [EC:2.7.10.1 2.7.11.1];K13417|5|2e-60|231|ath:AT2G13790|somatic embryogenesis receptor kinase 4 [EC:2.7.10.1 2.7.11.1]	-	GO:0004672//protein kinase activity;GO:0000166//nucleotide binding	-	gi|225434620|ref|XP_002279340.1|/0/PREDICTED: probable LRR receptor-like serine/threonine-protein kinase At1g53420 [Vitis vinifera]
GSVIVT01000440001	-2.49114	0.876708	K12135|1|6e-06|50.1|aly:ARALYDRAFT_488429|zinc finger protein CONSTANS	GO:0044464//cell part	GO:0046914//transition metal ion binding	-	gi|296081249|emb|CBI17993.3|/1.15561e-91/unnamed protein product [Vitis vinifera]
GSVIVT01018767001	-1.4892	0.826298	-	-	-	-	gi|225431116|ref|XP_002265805.1|/1.14922e-160/PREDICTED: thaumatin-like protein 1 [Vitis vinifera]
GSVIVT01010924001	2.62559	0.85333	K02706|1|7e-22|100|vvi:4025083|photosystem II P680 reaction center D2 protein	GO:0009521;GO:0031224//intrinsic to membrane;GO:0009534//chloroplast thylakoid;GO:0042716	GO:0046914//transition metal ion binding;GO:0009055//electron carrier activity	GO:0051234//establishment of localization;GO:0009767//photosynthetic electron transport chain	gi|296090317|emb|CBI40136.3|/4.75317e-64/unnamed protein product [Vitis vinifera]
GSVIVT01016476001	-2.97461	0.877422	K10615|1|5e-12|71.2|cme:CMB070C|E3 ubiquitin-protein ligase HERC4 [EC:6.3.2.19];K11493|4|9e-09|60.5|ota:Ot03g05690|regulator of chromosome condensation	-	GO:0016772//transferase activity, transferring phosphorus-containing groups	GO:0006796//phosphate-containing compound metabolic process	gi|225449388|ref|XP_002282470.1|/0/PREDICTED: X-linked retinitis pigmentosa GTPase regulator [Vitis vinifera]
GSVIVT01026015001	-2.69192	0.892409	-	GO:0043231//intracellular membrane-bounded organelle	GO:0016407//acetyltransferase activity	-	gi|359493310|ref|XP_002280208.2|/7.56983e-157/PREDICTED: uncharacterized protein LOC100244789 [Vitis vinifera]
GSVIVT01002735001	1.51562	0.805298	K11251|1|2e-35|147|vvi:100251194|histone H2A	GO:0000785//chromatin;GO:0031981//nuclear lumen	GO:0003676//nucleic acid binding	GO:0006950//response to stress;GO:0034728//nucleosome organization;GO:0051707//response to other organism;GO:0009292//genetic transfer	gi|225469123|ref|XP_002272843.1|/2.04259e-34/PREDICTED: probable histone H2A.3 [Vitis vinifera]
GSVIVT01024174001	-2.07007	0.873897	K01623|1|1e-152|537|vvi:100262354|fructose-bisphosphate aldolase, class I [EC:4.1.2.13]	-	GO:0016832//aldehyde-lyase activity	GO:0006007//glucose catabolic process	gi|297744727|emb|CBI37989.3|/1.4015e-151/unnamed protein product [Vitis vinifera]
GSVIVT01013788001	-1.58325	0.803439	-	GO:0043231//intracellular membrane-bounded organelle	-	-	gi|359473242|ref|XP_002265658.2|/0/PREDICTED: uncharacterized protein LOC100249925 [Vitis vinifera]
GSVIVT01008751001	-1.5956	0.810035	-	-	-	-	gi|302141721|emb|CBI18924.3|/1.72745e-18/unnamed protein product [Vitis vinifera]
GSVIVT01033109001	2.77241	0.808045	K00599|1|0.0|687|ath:AT3G27180|[EC:2.1.1.-]	GO:0009536//plastid	GO:0016741	GO:0000154//rRNA modification	gi|225451414|ref|XP_002273563.1|/0/PREDICTED: uncharacterized RNA methyltransferase pc1998 [Vitis vinifera]
GSVIVT01014386001	2.48571	0.870696	-	GO:0016020//membrane;GO:0044444//cytoplasmic part;GO:0043231//intracellular membrane-bounded organelle	-	-	gi|225461387|ref|XP_002284777.1|/1.37135e-148/PREDICTED: stem-specific protein TSJT1 [Vitis vinifera]
GSVIVT01021134001	1.82295	0.822016	K16040|1|3e-113|406|vvi:100233030|trans-resveratrol di-O-methyltransferase [EC:2.1.1.240];K13230|2|3e-62|237|zma:100147731|2,4,7-trihydroxy-1,4-benzoxazin-3-one-glucoside 7-O-methyltransferase [EC:2.1.1.241];K05279|3|6e-43|173|aly:ARALYDRAFT_495497|flavonol 3-O-methyltransferase [EC:2.1.1.76]	-	GO:0008171//O-methyltransferase activity	-	gi|225443570|ref|XP_002278127.1|/0/PREDICTED: isoflavone-7-O-methyltransferase 9 [Vitis vinifera]
GSVIVT01013163001	-1.40981	0.810878	K15109|1|2e-66|251|vvi:100257503|solute carrier family 25 (mitochondrial carnitine/acylcarnitine transporter), member 20/29	GO:0031224//intrinsic to membrane	-	GO:0051234//establishment of localization	gi|297742101|emb|CBI33888.3|/3.15478e-65/unnamed protein product [Vitis vinifera]
GSVIVT01016576001	4.17863	0.819204	K11254|1|2e-27|119|mtr:MTR_2g096100|histone H4	GO:0000785//chromatin;GO:0031090//organelle membrane;GO:0009536//plastid	GO:0003676//nucleic acid binding	GO:0034728//nucleosome organization	gi|296086257|emb|CBI31698.3|/1.87617e-45/unnamed protein product [Vitis vinifera]
GSVIVT01030865001	-2.1845	0.848659	-	GO:0044444//cytoplasmic part	GO:0005488//binding	GO:0009902//chloroplast relocation	gi|225453134|ref|XP_002271689.1|/9.12663e-83/PREDICTED: uncharacterized protein At1g66480 [Vitis vinifera]
GSVIVT01027902001	-2.49275	0.889771	-	GO:0009534//chloroplast thylakoid	-	GO:0006950//response to stress;GO:0009642//response to light intensity;GO:0009767//photosynthetic electron transport chain	gi|225433241|ref|XP_002285437.1|/2.51162e-67/PREDICTED: protein PROTON GRADIENT REGULATION 5, chloroplastic isoform 1 [Vitis vinifera]
GSVIVT01027558001	-3.95581	0.82606	K00517|1|6e-116|417|osa:4348172|[EC:1.14.-.-];K05280|5|6e-97|354|mtr:MTR_3g025230|flavonoid 3'-monooxygenase [EC:1.14.13.21]	-	GO:0016491//oxidoreductase activity;GO:0005506//iron ion binding	-	gi|296089103|emb|CBI38806.3|/0/unnamed protein product [Vitis vinifera]
GSVIVT01030626001	-2.42985	0.868015	-	-	GO:0005488//binding	GO:0007049//cell cycle	gi|225447342|ref|XP_002280596.1|/1.20894e-112/PREDICTED: cyclin-U1-1 [Vitis vinifera]
GSVIVT01032735001	-2.0258	0.843101	K07562|1|1e-39|163|sbi:SORBI_03g046345|nonsense-mediated mRNA decay protein 3;K14945|2|3e-19|95.9|rcu:RCOM_0126290|protein quaking	GO:0009534//chloroplast thylakoid	-	-	gi|225448586|ref|XP_002278231.1|/0/PREDICTED: uncharacterized protein LOC100253544 [Vitis vinifera]
GSVIVT01023241001	1.39156	0.802228	K02925|1|0.0|726|vvi:100260533|large subunit ribosomal protein L3e	GO:0030529//ribonucleoprotein complex	GO:0005198//structural molecule activity	GO:0010467//gene expression	gi|359486157|ref|XP_002263053.2|/0/PREDICTED: 60S ribosomal protein L3 [Vitis vinifera]
GSVIVT01028907001	-4.16694	0.934905	-	-	-	-	gi|302143835|emb|CBI22696.3|/9.3328e-67/unnamed protein product [Vitis vinifera]
GSVIVT01037728001	2.85085	0.890117	-	-	-	-	gi|359494079|ref|XP_002277391.2|/5.56456e-51/PREDICTED: LOW QUALITY PROTEIN: 65-kDa microtubule-associated protein 1-like [Vitis vinifera]
GSVIVT01037105001	-1.52977	0.834256	K06995|1|2e-45|180|gmx:100527470|	GO:0009536//plastid	-	-	gi|225459910|ref|XP_002263772.1|/5.8741e-76/PREDICTED: uncharacterized protein LOC100244771 [Vitis vinifera]
GSVIVT01027734001	-3.07877	0.85519	K13229|1|4e-84|310|zma:541977|2,4-dihydroxy-1,4-benzoxazin-3-one-glucoside dioxygenase [EC:1.14.20.2];K06892|2|1e-55|215|pop:POPTR_550478|;K05277|3|4e-41|167|gmx:547615|leucoanthocyanidin dioxygenase [EC:1.14.11.19]	-	GO:0046914//transition metal ion binding;GO:0016706//oxidoreductase activity, acting on paired donors, with incorporation or reduction of molecular oxygen, 2-oxoglutarate as one donor, and incorporation of one atom each of oxygen into both donors	GO:0008152//metabolic process	gi|225433009|ref|XP_002284582.1|/0/PREDICTED: 1-aminocyclopropane-1-carboxylate oxidase homolog 1 [Vitis vinifera]
GSVIVT01028864001	-1.71654	0.852703	K15746|1|4e-178|622|vvi:100268009|beta-carotene 3-hydroxylase [EC:1.14.13.129]	GO:0031224//intrinsic to membrane	GO:0046914//transition metal ion binding;GO:0003824//catalytic activity	GO:0006631//fatty acid metabolic process	gi|225464577|ref|XP_002273581.1|/4.61052e-177/PREDICTED: beta-carotene hydroxylase 2, chloroplastic isoform 1 [Vitis vinifera]
GSVIVT01011433001	-2.39038	0.876211	-	-	-	-	gi|296082933|emb|CBI22234.3|/0/unnamed protein product [Vitis vinifera]
GSVIVT01026835001	2.74945	0.810705	K15095|1|1e-137|487|vvi:100248214|(+)-neomenthol dehydrogenase [EC:1.1.1.208]	GO:0016020//membrane	GO:0016616//oxidoreductase activity, acting on the CH-OH group of donors, NAD or NADP as acceptor	GO:0008152//metabolic process;GO:0006950//response to stress;GO:0009628//response to abiotic stimulus	gi|359489758|ref|XP_002272027.2|/5.90629e-164/PREDICTED: (+)-neomenthol dehydrogenase-like [Vitis vinifera]
GSVIVT01031930001	-3.00645	0.905298	K08150|1|6e-47|163|gmx:100802679|MFS transporter, SP family, solute carrier family 2 (myo-inositol transporter), member 13	GO:0031224//intrinsic to membrane	GO:0016491//oxidoreductase activity;GO:0022857//transmembrane transporter activity	GO:0006810//transport	gi|359475274|ref|XP_003631630.1|/0/PREDICTED: polyol transporter 5-like [Vitis vinifera]
GSVIVT01036566001	1.75218	0.831401	-	-	-	-	gi|298204466|emb|CBI16946.3|/0/unnamed protein product [Vitis vinifera]
GSVIVT01025210001	1.63976	0.828071	-	-	-	-	gi|359478706|ref|XP_003632158.1|/1.99238e-06/PREDICTED: uncharacterized protein LOC100853239 [Vitis vinifera]
GSVIVT01023333001	1.82289	0.831012	K08900|1|2e-82|304|pop:POPTR_248199|mitochondrial chaperone BCS1	-	GO:0000166//nucleotide binding	-	gi|359486179|ref|XP_002268083.2|/0/PREDICTED: probable mitochondrial chaperone BCS1-B-like isoform 1 [Vitis vinifera]
GSVIVT01033349001	2.25264	0.840138	K01213|1|1e-13|76.6|pop:POPTR_552472|galacturan 1,4-alpha-galacturonidase [EC:3.2.1.67];K01184|2|2e-11|69.3|aly:ARALYDRAFT_486197|polygalacturonase [EC:3.2.1.15]	GO:0031090//organelle membrane;GO:0031410//cytoplasmic vesicle	GO:0004553//hydrolase activity, hydrolyzing O-glycosyl compounds	GO:0045229//external encapsulating structure organization;GO:0044238//primary metabolic process	gi|297739712|emb|CBI29894.3|/0/unnamed protein product [Vitis vinifera]
GSVIVT01013758001	3.42204	0.806315	-	-	GO:0016491//oxidoreductase activity	-	gi|297739054|emb|CBI28543.3|/0/unnamed protein product [Vitis vinifera]
GSVIVT01007190001	4.50385	0.936138	K01183|1|3e-111|399|vvi:100232985|chitinase [EC:3.2.1.14]	-	GO:0004553//hydrolase activity, hydrolyzing O-glycosyl compounds;GO:0030247//polysaccharide binding	GO:0006026	gi|296080858|emb|CBI18788.3|/1.01109e-148/unnamed protein product [Vitis vinifera]
GSVIVT01013434001	2.26488	0.82327	K09753|1|4e-81|301|pop:POPTR_828721|cinnamoyl-CoA reductase [EC:1.2.1.44]	-	GO:0016620//oxidoreductase activity, acting on the aldehyde or oxo group of donors, NAD or NADP as acceptor;GO:0048037//cofactor binding;GO:0016616//oxidoreductase activity, acting on the CH-OH group of donors, NAD or NADP as acceptor	GO:0009699//phenylpropanoid biosynthetic process;GO:0010038//response to metal ion	gi|225457658|ref|XP_002275562.1|/0/PREDICTED: bifunctional dihydroflavonol 4-reductase/flavanone 4-reductase [Vitis vinifera]
GSVIVT01000145001	3.43751	0.913214	-	-	-	-	gi|296087340|emb|CBI33714.3|/2.18317e-108/unnamed protein product [Vitis vinifera]
GSVIVT01012577001	3.07468	0.883196	K13263|1|4e-106|383|gmx:100101902|isoflavone 7-O-glucosyltransferase [EC:2.4.1.170];K08237|2|6e-76|283|vvi:100246482|hydroquinone glucosyltransferase [EC:2.4.1.218]	-	GO:0016757//transferase activity, transferring glycosyl groups	-	gi|298204824|emb|CBI25657.3|/0/unnamed protein product [Vitis vinifera]
GSVIVT01020146001	3.18685	0.836051	K14492|1|9e-65|244|rcu:RCOM_0699760|two-component response regulator ARR-A family	-	GO:0004871//signal transducer activity;GO:0016772//transferase activity, transferring phosphorus-containing groups	GO:0006351//transcription, DNA-dependent;GO:0007165//signal transduction;GO:0006796//phosphate-containing compound metabolic process	gi|296086487|emb|CBI32076.3|/1.93572e-100/unnamed protein product [Vitis vinifera]
GSVIVT01038643001	2.13062	0.866933	-	GO:0009532//plastid stroma;GO:0030529//ribonucleoprotein complex	GO:0003723//RNA binding	GO:0010467//gene expression	gi|359490749|ref|XP_003634154.1|/2.07367e-145/PREDICTED: 30S ribosomal protein 1, chloroplastic-like [Vitis vinifera]
GSVIVT01008962001	1.78265	0.822253	-	-	-	-	gi|302141898|emb|CBI19101.3|/1.41834e-82/unnamed protein product [Vitis vinifera]
GSVIVT01019774001	1.75073	0.808067	K07375|1|1e-14|76.3|mtr:MTR_7g089120|tubulin beta	-	-	-	gi|297742537|emb|CBI34686.3|/3.24311e-17/unnamed protein product [Vitis vinifera]
GSVIVT01012660001	3.49971	0.817604	K08339|1|4e-12|70.1|olu:OSTLU_8657|autophagy-related protein 5	-	-	-	gi|302144090|emb|CBI23195.3|/1.41868e-100/unnamed protein product [Vitis vinifera]
GSVIVT01023590001	-1.90923	0.86449	K00131|1|0.0|991|vvi:100260378|glyceraldehyde-3-phosphate dehydrogenase (NADP) [EC:1.2.1.9]	GO:0044424//intracellular part	-	GO:0008152//metabolic process	gi|225445885|ref|XP_002279374.1|/0/PREDICTED: NADP-dependent glyceraldehyde-3-phosphate dehydrogenase [Vitis vinifera]
GSVIVT01007583001	2.91074	0.880926	K00517|1|1e-106|385|ath:AT3G48360|[EC:1.14.-.-];K04498|3|2e-11|68.9|sbi:SORBI_04g003020|E1A/CREB-binding protein [EC:2.3.1.48]	GO:0043231//intracellular membrane-bounded organelle	GO:0000989//transcription factor binding transcription factor activity;GO:0004468//lysine N-acetyltransferase activity;GO:0046914//transition metal ion binding;GO:0005515//protein binding	GO:0009725//response to hormone stimulus;GO:0000302//response to reactive oxygen species;GO:0048229//gametophyte development;GO:0006351//transcription, DNA-dependent	gi|225456816|ref|XP_002278192.1|/0/PREDICTED: BTB/POZ and TAZ domain-containing protein 1-like [Vitis vinifera]
GSVIVT01008238001	-1.51306	0.824394	K13081|1|8e-180|628|vvi:100233112|leucoanthocyanidin reductase [EC:1.17.1.3]	-	-	-	gi|225455852|ref|XP_002273915.1|/1.02239e-178/PREDICTED: leucoanthocyanidin reductase [Vitis vinifera]
GSVIVT01012865001	2.45005	0.882894	-	-	-	-	gi|296084553|emb|CBI25574.3|/2.69471e-116/unnamed protein product [Vitis vinifera]
GSVIVT01024735001	-2.2185	0.879044	K06215|1|2e-79|294|vvi:100260451|pyridoxine biosynthesis protein [EC:4.-.-.-]	GO:0009536//plastid;GO:0016020//membrane	GO:0042802//identical protein binding;GO:0046983//protein dimerization activity	GO:0019752//carboxylic acid metabolic process;GO:0033194//response to hydroperoxide;GO:0008614//pyridoxine metabolic process;GO:0006778//porphyrin-containing compound metabolic process;GO:0042364;GO:0006972//hyperosmotic response	gi|297745895|emb|CBI15951.3|/4.09765e-161/unnamed protein product [Vitis vinifera]
GSVIVT01011966001	-1.80177	0.85599	-	GO:0009527//plastid outer membrane	-	GO:0009658//chloroplast organization	gi|147860149|emb|CAN78725.1|/0/hypothetical protein VITISV_020008 [Vitis vinifera]
GSVIVT01020462001	2.27145	0.837911	-	-	-	-	gi|296082795|emb|CBI21800.3|/1.05553e-112/unnamed protein product [Vitis vinifera]
GSVIVT01026582001	4.41778	0.89708	K11253|1|4e-40|161|mtr:MTR_1g105310|histone H3	GO:0043231//intracellular membrane-bounded organelle	GO:0005488//binding	-	gi|296088610|emb|CBI37601.3|/6.26625e-56/unnamed protein product [Vitis vinifera]
GSVIVT01008252001	-2.27152	0.820934	K12603|1|4e-33|140|smo:SELMODRAFT_178984|CCR4-NOT transcription complex subunit 6	-	-	-	gi|297734177|emb|CBI15424.3|/0/unnamed protein product [Vitis vinifera]
GSVIVT01030135001	-2.4948	0.88577	-	-	-	-	gi|225447462|ref|XP_002263769.1|/1.39176e-57/PREDICTED: uncharacterized protein LOC100252914 [Vitis vinifera]
GSVIVT01012796001	1.72655	0.840787	K13457|1|6e-10|65.1|sbi:SORBI_02g004900|disease resistance protein RPM1;K06685|3|4e-07|55.5|ath:AT4G19050|maintenance of ploidy protein MOB1 (MPS1 binder 1)	-	-	-	gi|359493289|ref|XP_003634561.1|/0/PREDICTED: putative disease resistance protein At4g11170-like [Vitis vinifera]
GSVIVT01020828001	-2.26793	0.877963	K02291|1|0.0|797|vvi:100252385|phytoene synthase [EC:2.5.1.32]	GO:0009536//plastid	GO:0004337//geranyltranstransferase activity	GO:0016109	gi|225446787|ref|XP_002283193.1|/0/PREDICTED: phytoene synthase, chloroplastic isoform 1 [Vitis vinifera]
GSVIVT01027784001	3.66692	0.922405	-	-	-	-	gi|296083632|emb|CBI23621.3|/7.65526e-39/unnamed protein product [Vitis vinifera]
GSVIVT01021575001	1.47755	0.819291	-	-	-	GO:0012501//programmed cell death	gi|225443974|ref|XP_002280537.1|/1.27105e-135/PREDICTED: uncharacterized protein LOC100266950 [Vitis vinifera]
GSVIVT01030190001	1.32191	0.813084	-	-	GO:0005488//binding	GO:0051234//establishment of localization;GO:0010876//lipid localization	gi|297735549|emb|CBI18043.3|/4.8592e-76/unnamed protein product [Vitis vinifera]
GSVIVT01000416001	4.98019	0.956272	K08235|1|3e-167|586|vvi:100248328|xyloglucan:xyloglucosyl transferase [EC:2.4.1.207]	GO:0005576//extracellular region;GO:0030312//external encapsulating structure	GO:0016798//hydrolase activity, acting on glycosyl bonds;GO:0016758//transferase activity, transferring hexosyl groups	GO:0044042//glucan metabolic process	gi|225447415|ref|XP_002281574.1|/3.38255e-166/PREDICTED: xyloglucan endotransglucosylase/hydrolase protein 9 [Vitis vinifera]
GSVIVT01024400001	-1.62473	0.836073	K01904|1|0.0|998|vvi:100245991|4-coumarate--CoA ligase [EC:6.2.1.12]	-	GO:0016405//CoA-ligase activity;GO:0016703;GO:0032559	GO:0006725//cellular aromatic compound metabolic process	gi|225454787|ref|XP_002274994.1|/0/PREDICTED: 4-coumarate--CoA ligase 2 [Vitis vinifera]
GSVIVT01001299001	2.13681	0.873724	-	-	-	-	gi|297741175|emb|CBI31906.3|/6.76435e-39/unnamed protein product [Vitis vinifera]
GSVIVT01028722001	-1.5027	0.814922	K05666|1|1e-166|586|olu:OSTLU_35503|ATP-binding cassette, subfamily C (CFTR/MRP), member 2;K05658|2|5e-62|238|bdi:100833702|ATP-binding cassette, subfamily B (MDR/TAP), member 1	GO:0031224//intrinsic to membrane	GO:0017111//nucleoside-triphosphatase activity;GO:0016628//oxidoreductase activity, acting on the CH-CH group of donors, NAD or NADP as acceptor;GO:0015405;GO:0032559	GO:0006810//transport;GO:0009207	gi|302143690|emb|CBI22551.3|/0/unnamed protein product [Vitis vinifera]
GSVIVT01016950001	2.6124	0.891263	K01206|1|4e-24|110|ath:AT1G67830|alpha-L-fucosidase [EC:3.2.1.51];K00514|3|4e-19|94.4|rcu:RCOM_1428040|zeta-carotene desaturase [EC:1.3.5.6]	-	GO:0016787//hydrolase activity	GO:0044238//primary metabolic process	gi|297743164|emb|CBI36031.3|/0/unnamed protein product [Vitis vinifera]
GSVIVT01033376001	-1.33576	0.810748	K10610|1|3e-23|108|ota:Ot10g03450|DNA damage-binding protein 1;K03671|2|2e-08|58.9|pop:POPTR_219472|thioredoxin 1	GO:0009941//chloroplast envelope;GO:0009532//plastid stroma	GO:0015036//disulfide oxidoreductase activity	GO:0018904;GO:0019725//cellular homeostasis	gi|225441658|ref|XP_002282457.1|/6.04797e-157/PREDICTED: thioredoxin-like 1-1, chloroplastic-like [Vitis vinifera]
GSVIVT01012040001	1.63466	0.834191	K01915|1|0.0|688|pop:POPTR_819912|glutamine synthetase [EC:6.3.1.2]	GO:0044424//intracellular part	GO:0016211;GO:0032559	GO:0006541//glutamine metabolic process;GO:0071941	gi|147768273|emb|CAN62668.1|/0/hypothetical protein VITISV_041911 [Vitis vinifera]
GSVIVT01028986001	-2.31175	0.836289	K10143|1|7e-15|79.3|gmx:100788171|E3 ubiquitin-protein ligase RFWD2 [EC:6.3.2.19]	-	-	-	gi|302143897|emb|CBI22758.3|/1.19653e-140/unnamed protein product [Vitis vinifera]
GSVIVT01007578001	1.40399	0.814035	K01251|1|7e-146|515|vvi:100265604|adenosylhomocysteinase [EC:3.3.1.1]	GO:0043231//intracellular membrane-bounded organelle;GO:0031090//organelle membrane	GO:0016802;GO:0046914//transition metal ion binding	GO:0010608//posttranscriptional regulation of gene expression;GO:0006342//chromatin silencing;GO:0003006//developmental process involved in reproduction	gi|225456806|ref|XP_002278000.1|/9.11229e-145/PREDICTED: adenosylhomocysteinase-like isoform 1 [Vitis vinifera]
GSVIVT01023919001	3.07079	0.87167	-	GO:0044464//cell part	-	GO:0000902//cell morphogenesis;GO:0009827//plant-type cell wall modification;GO:0000003//reproduction	gi|225428199|ref|XP_002281851.1|/2.62403e-146/PREDICTED: expansin-like A2 [Vitis vinifera]
GSVIVT01037416001	1.77396	0.833715	K07199|1|6e-118|422|gmx:100789052|5'-AMP-activated protein kinase, regulatory beta subunit	-	GO:0005488//binding	GO:0031669//cellular response to nutrient levels	gi|225435969|ref|XP_002270683.1|/8.3699e-169/PREDICTED: SNF1-related protein kinase regulatory subunit beta-1 [Vitis vinifera]
GSVIVT01027958001	1.29344	0.805428	K00799|1|4e-121|432|vvi:100243577|glutathione S-transferase [EC:2.5.1.18]	-	GO:0016740//transferase activity	-	gi|225437284|ref|XP_002262604.1|/5.64746e-120/PREDICTED: glutathione S-transferase [Vitis vinifera]
GSVIVT01038629001	2.8523	0.876211	-	-	-	-	gi|302143968|emb|CBI23073.3|/0/unnamed protein product [Vitis vinifera]
GSVIVT01010593001	6.4566	0.828071	-	-	-	-	gi|225455400|ref|XP_002278502.1|/7.81113e-60/PREDICTED: uncharacterized protein LOC100241934 [Vitis vinifera]
GSVIVT01022354001	2.47358	0.878958	-	-	-	-	gi|296082607|emb|CBI21612.3|/1.46897e-156/unnamed protein product [Vitis vinifera]
GSVIVT01001847001	1.62925	0.824676	K00036|1|0.0|1044|vvi:100254253|glucose-6-phosphate 1-dehydrogenase [EC:1.1.1.49]	GO:0044444//cytoplasmic part	GO:0016616//oxidoreductase activity, acting on the CH-OH group of donors, NAD or NADP as acceptor;GO:0000166//nucleotide binding	GO:0006098//pentose-phosphate shunt	gi|225452196|ref|XP_002266527.1|/0/PREDICTED: glucose-6-phosphate 1-dehydrogenase, cytoplasmic isoform [Vitis vinifera]
GSVIVT01028050001	2.44194	0.865549	K09286|1|2e-25|115|pop:POPTR_828432|EREBP-like factor	-	-	-	gi|297743922|emb|CBI36892.3|/1.23175e-128/unnamed protein product [Vitis vinifera]
GSVIVT01034944001	2.62179	0.858283	-	-	-	-	gi|225432057|ref|XP_002280462.1|/0/PREDICTED: uncharacterized protein LOC100233037 [Vitis vinifera]
GSVIVT01036490001	-1.43093	0.822816	K01611|1|3e-65|246|vvi:100265287|S-adenosylmethionine decarboxylase [EC:4.1.1.50]	-	GO:0016831//carboxy-lyase activity	GO:0006596//polyamine biosynthetic process	gi|298204413|emb|CBI16893.3|/1.3815e-75/unnamed protein product [Vitis vinifera]
GSVIVT01033962001	1.86927	0.850887	K07300|1|3e-159|560|pop:POPTR_653119|Ca2+:H+ antiporter	GO:0016020//membrane	-	GO:0006810//transport	gi|359481659|ref|XP_002274791.2|/0/PREDICTED: vacuolar cation/proton exchanger 3-like [Vitis vinifera]
GSVIVT01011490001	-1.50337	0.821972	-	-	-	-	gi|225452938|ref|XP_002284191.1|/0/PREDICTED: uncharacterized protein LOC100268024 isoform 1 [Vitis vinifera]
GSVIVT01007985001	1.62185	0.821086	K10610|1|7e-23|107|ota:Ot10g03450|DNA damage-binding protein 1;K03671|2|1e-09|63.2|pop:POPTR_219472|thioredoxin 1	GO:0009941//chloroplast envelope;GO:0009532//plastid stroma	GO:0015036//disulfide oxidoreductase activity	GO:0018904;GO:0019725//cellular homeostasis	gi|225457383|ref|XP_002284847.1|/5.9883e-159/PREDICTED: thioredoxin-like 1-1, chloroplastic [Vitis vinifera]
GSVIVT01009155001	2.78332	0.89721	-	GO:0005576//extracellular region;GO:0005618//cell wall	-	-	gi|359492937|ref|XP_002283889.2|/3.06865e-85/PREDICTED: aspartic proteinase nepenthesin-1-like [Vitis vinifera]
GSVIVT01011958001	3.12071	0.869291	K13081|1|0.0|687|vvi:100232982|leucoanthocyanidin reductase [EC:1.17.1.3]	-	GO:0005488//binding	-	gi|66570968|emb|CAI26309.1|/0/leucoanthocyanidin reductase 1 [Vitis vinifera]
GSVIVT01008534001	2.71583	0.866869	-	-	GO:0016772//transferase activity, transferring phosphorus-containing groups	GO:0006796//phosphate-containing compound metabolic process	gi|225456307|ref|XP_002283726.1|/0/PREDICTED: SNF1-related protein kinase regulatory subunit gamma-1-like [Vitis vinifera]
GSVIVT01024970001	2.00973	0.86157	-	-	-	-	gi|359478953|ref|XP_003632193.1|/2.94581e-06/PREDICTED: metallothionein-like protein type 2-like isoform 5 [Vitis vinifera]
GSVIVT01036591001	-1.55719	0.821042	K14493|1|6e-31|132|ppp:PHYPADRAFT_118478|gibberellin receptor GID1 [EC:3.-.-.-]	-	-	-	gi|296087809|emb|CBI35065.3|/8.4416e-178/unnamed protein product [Vitis vinifera]
GSVIVT01022403001	1.51972	0.800151	K01601|1|1e-102|344|vvi:4025045|ribulose-bisphosphate carboxylase large chain [EC:4.1.1.39]	GO:0009536//plastid	GO:0046872//metal ion binding;GO:0016491//oxidoreductase activity;GO:0016831//carboxy-lyase activity	GO:0043094;GO:0015977//carbon fixation	gi|289105|gb|AAA93537.1|/1.42239e-101/ribulose-1,5-bisphosphate carboxylase/oxygenase large subunit, partial (chloroplast) [Acer saccharum]
GSVIVT01016112001	-2.81503	0.893274	K02866|1|4e-23|106|osa:4332737|large subunit ribosomal protein L10e	-	GO:0016791//phosphatase activity	-	gi|359483145|ref|XP_003632911.1|/9.5806e-141/PREDICTED: acid phosphatase 1-like [Vitis vinifera]
GSVIVT01028236001	3.07536	0.806272	K15639|1|6e-103|373|ath:AT2G26710|cytochrome P450, family 734, subfamily A, polypeptide 1 (PHYB activation tagged suppressor 1) [EC:1.14.-.-];K10717|3|4e-99|360|pop:POPTR_555847|cytokinin trans-hydroxylase	-	GO:0016491//oxidoreductase activity;GO:0005506//iron ion binding	-	gi|359479981|ref|XP_002273663.2|/0/PREDICTED: cytochrome P450 734A6 [Vitis vinifera]
GSVIVT01031620001	2.44029	0.881618	K12462|1|1e-104|378|vvi:100260088|Rho GDP-dissociation inhibitor	-	-	-	gi|225433634|ref|XP_002263904.1|/1.42082e-103/PREDICTED: rho GDP-dissociation inhibitor 1 [Vitis vinifera]
GSVIVT01016667001	1.59393	0.82167	K01051|1|0.0|739|vvi:100251413|pectinesterase [EC:3.1.1.11]	-	GO:0016788//hydrolase activity, acting on ester bonds	GO:0071555//cell wall organization	gi|297742928|emb|CBI35795.3|/0/unnamed protein product [Vitis vinifera]
GSVIVT01009299001	3.52274	0.806466	-	-	-	-	gi|359492530|ref|XP_002283504.2|/0/PREDICTED: uncharacterized protein LOC100260890 [Vitis vinifera]
GSVIVT01036094001	2.14776	0.869593	-	-	-	-	gi|225464902|ref|XP_002274217.1|/1.13698e-89/PREDICTED: uncharacterized protein LOC100258720 [Vitis vinifera]
GSVIVT01017699001	-1.25718	0.801752	-	-	-	-	gi|297736822|emb|CBI26023.3|/3.38364e-132/unnamed protein product [Vitis vinifera]
GSVIVT01011149001	-1.77971	0.849351	K09480|1|0.0|1211|vvi:100259167|digalactosyldiacylglycerol synthase [EC:2.4.1.241]	GO:0009527//plastid outer membrane;GO:0030659//cytoplasmic vesicle membrane	GO:0035250//UDP-galactosyltransferase activity	GO:0044403//symbiosis, encompassing mutualism through parasitism;GO:0008152//metabolic process	gi|296083152|emb|CBI22788.3|/0/unnamed protein product [Vitis vinifera]
GSVIVT01020928001	-2.49181	0.876038	K00696|1|0.0|1965|vvi:100262385|sucrose-phosphate synthase [EC:2.4.1.14]	-	GO:0035251//UDP-glucosyltransferase activity	GO:0005984//disaccharide metabolic process	gi|298205168|emb|CBI17227.3|/0/unnamed protein product [Vitis vinifera]
GSVIVT01032059001	2.24188	0.85093	-	-	-	-	gi|297736222|emb|CBI24860.3|/7.66786e-38/unnamed protein product [Vitis vinifera]
GSVIVT01001406001	2.49799	0.873811	K12124|1|0.0|1022|vvi:100254197|GIGANTEA	-	-	-	gi|225470820|ref|XP_002264755.1|/0/PREDICTED: protein GIGANTEA-like [Vitis vinifera]
GSVIVT01032726001	2.03309	0.862067	-	GO:0016020//membrane	-	-	gi|297736533|emb|CBI25404.3|/0/unnamed protein product [Vitis vinifera]
GSVIVT01024338001	-2.27355	0.86689	-	-	-	-	gi|297737275|emb|CBI26476.3|/2.99833e-92/unnamed protein product [Vitis vinifera]
GSVIVT01029445001	-3.56024	0.921648	-	GO:0042579//microbody	-	-	gi|225443486|ref|XP_002274112.1|/9.55924e-66/PREDICTED: uncharacterized protein LOC100261598 [Vitis vinifera]
GSVIVT01031814001	-1.44303	0.809343	K06892|1|9e-101|365|ath:AT3G19010|;K05278|4|2e-42|171|pop:POPTR_665178|flavonol synthase [EC:1.14.11.23]	-	GO:0016491//oxidoreductase activity;GO:0046914//transition metal ion binding	GO:0008152//metabolic process	gi|359475228|ref|XP_003631618.1|/0/PREDICTED: gibberellin 20 oxidase 1-like [Vitis vinifera]
GSVIVT01037719001	1.80631	0.816436	-	GO:0043231//intracellular membrane-bounded organelle	-	-	gi|225460861|ref|XP_002277248.1|/1.47558e-59/PREDICTED: brain protein 44 [Vitis vinifera]
GSVIVT01024022001	2.141	0.869161	K07213|1|4e-09|60.1|mtr:MTR_7g013660|copper chaperone	GO:0016020//membrane	GO:0043169//cation binding	GO:0006812//cation transport;GO:0009408//response to heat	gi|225428033|ref|XP_002278879.1|/2.85373e-87/PREDICTED: uncharacterized protein LOC100260571 isoform 1 [Vitis vinifera]
GSVIVT01015378001	-2.22264	0.874849	K15336|1|5e-45|181|vvi:100259391|tRNA (cytosine38-C5)-methyltransferase [EC:2.1.1.204]	-	-	-	gi|225445222|ref|XP_002280919.1|/0/PREDICTED: pentatricopeptide repeat-containing protein At5g21222 [Vitis vinifera]
GSVIVT01026888001	2.32281	0.869637	-	-	-	-	gi|225454180|ref|XP_002272142.1|/2.21753e-139/PREDICTED: uncharacterized protein LOC100265498 [Vitis vinifera]
GSVIVT01014407001	-1.63502	0.846929	K13348|1|6e-22|103|cme:CMS031C|protein Mpv17	GO:0031224//intrinsic to membrane;GO:0009536//plastid	-	-	gi|225461355|ref|XP_002284644.1|/1.18332e-178/PREDICTED: uncharacterized protein LOC100253839 [Vitis vinifera]
GSVIVT01022235001	-1.37058	0.817647	K06185|1|9e-57|220|cre:CHLREDRAFT_132213|ATP-binding cassette, subfamily F, member 2;K06158|5|4e-51|201|aly:ARALYDRAFT_474891|ATP-binding cassette, subfamily F, member 3	-	GO:0017111//nucleoside-triphosphatase activity;GO:0004672//protein kinase activity;GO:0032559	GO:0006464//cellular protein modification process	gi|296082509|emb|CBI21514.3|/0/unnamed protein product [Vitis vinifera]
GSVIVT01024997001	2.72719	0.846432	-	GO:0005618//cell wall	-	GO:0009607//response to biotic stimulus	gi|297746104|emb|CBI16160.3|/2.01685e-86/unnamed protein product [Vitis vinifera]
GSVIVT01009066001	4.76649	0.935921	-	-	-	-	gi|302141982|emb|CBI19185.3|/7.42335e-172/unnamed protein product [Vitis vinifera]
GSVIVT01024036001	-1.63949	0.816522	K09422|1|3e-110|396|vvi:100233133|myb proto-oncogene protein, plant	-	-	-	gi|297744620|emb|CBI37882.3|/1.50785e-114/unnamed protein product [Vitis vinifera]
GSVIVT01013272001	-4.22567	0.936527	K01177|1|0.0|931|vvi:100247246|beta-amylase [EC:3.2.1.2]	GO:0009532//plastid stroma	GO:0016160//amylase activity;GO:0043167//ion binding	GO:0005982//starch metabolic process;GO:0006950//response to stress;GO:0000023//maltose metabolic process	gi|297742190|emb|CBI33977.3|/0/unnamed protein product [Vitis vinifera]
GSVIVT01014471001	-1.64734	0.820502	K12135|1|4e-07|54.3|ath:AT5G15840|zinc finger protein CONSTANS	GO:0044464//cell part	GO:0046914//transition metal ion binding	-	gi|302143108|emb|CBI20403.3|/3.61132e-125/unnamed protein product [Vitis vinifera]
GSVIVT01010000001	-1.63032	0.801211	-	-	-	-	gi|302142741|emb|CBI19944.3|/0/unnamed protein product [Vitis vinifera]
GSVIVT01023803001	-1.70588	0.814922	-	-	-	-	gi|359474932|ref|XP_002280381.2|/0/PREDICTED: F-box protein At2g16365-like [Vitis vinifera]
GSVIVT01031042001	-1.40467	0.814641	K15397|1|1e-77|287|vvi:100266928|3-ketoacyl-CoA synthase [EC:2.3.1.-]	-	GO:0016740//transferase activity	GO:0008152//metabolic process	gi|296087283|emb|CBI33657.3|/2.17481e-102/unnamed protein product [Vitis vinifera]
GSVIVT01003762001	3.63469	0.826081	K13449|1|5e-27|119|rcu:RCOM_1381930|pathogenesis-related protein 1	-	-	-	gi|225468210|ref|XP_002262744.1|/1.84472e-98/PREDICTED: STS14 protein [Vitis vinifera]
GSVIVT01013726001	5.75068	0.846929	K13366|1|0.0|967|vvi:100241347|polyamine oxidase (propane-1,3-diamine-forming) [EC:1.5.3.14]	GO:0031410//cytoplasmic vesicle	GO:0003824//catalytic activity	GO:0008152//metabolic process	gi|225425517|ref|XP_002267667.1|/0/PREDICTED: polyamine oxidase [Vitis vinifera]
GSVIVT01014547001	1.39896	0.816198	K06236|1|2e-21|101|pop:POPTR_584471|collagen, type I/II/III/V/XI, alpha	GO:0009536//plastid	-	-	gi|225461197|ref|XP_002283211.1|/7.41411e-110/PREDICTED: DAG protein, chloroplastic isoform 1 [Vitis vinifera]
GSVIVT01005963001	2.03155	0.863084	-	-	-	-	gi|225448835|ref|XP_002282487.1|/3.57022e-35/PREDICTED: uncharacterized protein LOC100267224 [Vitis vinifera]
GSVIVT01015538001	-2.34728	0.859818	-	GO:0043231//intracellular membrane-bounded organelle	GO:0004871//signal transducer activity	GO:0010647//positive regulation of cell communication;GO:0009267//cellular response to starvation	gi|225445503|ref|XP_002285199.1|/2.474e-142/PREDICTED: SPX domain-containing protein 2 isoform 1 [Vitis vinifera]
GSVIVT01038046001	2.07244	0.86449	K00799|1|5e-89|325|gmx:547936|glutathione S-transferase [EC:2.5.1.18]	-	-	-	gi|225462624|ref|XP_002264437.1|/1.70102e-117/PREDICTED: probable glutathione S-transferase [Vitis vinifera]
GSVIVT01034129001	-1.49115	0.828914	-	GO:0043231//intracellular membrane-bounded organelle	-	-	gi|225440430|ref|XP_002270357.1|/5.00289e-62/PREDICTED: uncharacterized protein LOC100263187 [Vitis vinifera]
GSVIVT01029166001	4.3131	0.873854	K08235|1|8e-129|458|vvi:100252949|xyloglucan:xyloglucosyl transferase [EC:2.4.1.207];K14504|2|1e-126|451|vvi:100256520|xyloglucan:xyloglucosyl transferase TCH4 [EC:2.4.1.207]	GO:0005576//extracellular region;GO:0030312//external encapsulating structure	GO:0016798//hydrolase activity, acting on glycosyl bonds;GO:0016758//transferase activity, transferring hexosyl groups	GO:0044042//glucan metabolic process	gi|297735361|emb|CBI17801.3|/1.34629e-137/unnamed protein product [Vitis vinifera]
GSVIVT01034049001	2.79546	0.86542	K09553|1|8e-10|63.2|bdi:100833392|stress-induced-phosphoprotein 1;K04460|2|1e-09|62.8|gmx:100806083|protein phosphatase 5 [EC:3.1.3.16]	-	-	-	gi|297740280|emb|CBI30462.3|/0/unnamed protein product [Vitis vinifera]
GSVIVT01021975001	-1.66026	0.802984	K02986|1|4e-63|241|vvi:4025094|small subunit ribosomal protein S4	GO:0030529//ribonucleoprotein complex;GO:0009536//plastid	GO:0003723//RNA binding;GO:0005198//structural molecule activity	GO:0010467//gene expression	gi|298204988|emb|CBI34295.3|/2.40192e-70/unnamed protein product [Vitis vinifera]
GSVIVT01031580001	4.46608	0.880839	K12338|1|2e-45|178|ath:AT4G14090|anthocyanin 5-O-glucosyltransferase [EC:2.4.1.-];K13692|2|2e-45|178|ath:AT1G05560|UDP-glucose:(indol-3-yl)acetate beta-D-glucosyltransferase [EC:2.4.1.121];K13691|4|2e-42|168|pop:POPTR_718172|pathogen-inducible salicylic acid glucosyltransferase [EC:2.4.1.-]	-	-	-	gi|359478013|ref|XP_003632054.1|/1.6197e-72/PREDICTED: UDP-glycosyltransferase 75D1-like [Vitis vinifera]
GSVIVT01024454001	-1.50992	0.832526	K00366|1|3e-07|54.7|ota:Ot10g00930|ferredoxin-nitrite reductase [EC:1.7.7.1]	GO:0009526//plastid envelope;GO:0009534//chloroplast thylakoid	GO:0043169//cation binding	-	gi|359489916|ref|XP_002275188.2|/1.38149e-112/PREDICTED: uncharacterized protein LOC100263114 [Vitis vinifera]
GSVIVT01032644001	3.06278	0.878395	K12129|1|0.0|720|pop:POPTR_563807|pseudo-response regulator 7	-	-	-	gi|297736458|emb|CBI25329.3|/0/unnamed protein product [Vitis vinifera]
GSVIVT01034510001	1.61807	0.813776	K11253|1|2e-40|163|ota:Ot11g02340|histone H3	GO:0043231//intracellular membrane-bounded organelle	GO:0005488//binding	-	gi|296088610|emb|CBI37601.3|/5.9215e-44/unnamed protein product [Vitis vinifera]
GSVIVT01017917001	-3.4053	0.814468	-	-	-	-	gi|297737008|emb|CBI26209.3|/0/unnamed protein product [Vitis vinifera]
GSVIVT01014185001	2.82088	0.83125	-	-	-	-	gi|225461699|ref|XP_002285489.1|/6.53558e-29/PREDICTED: pathogen-related protein [Vitis vinifera]
GSVIVT01028566001	2.18833	0.843253	-	-	-	-	gi|225464225|ref|XP_002265748.1|/1.76889e-161/PREDICTED: uncharacterized protein LOC100252818 [Vitis vinifera]
GSVIVT01033567001	1.4645	0.821864	K13448|1|4e-79|292|vvi:100264151|calcium-binding protein CML	GO:0016020//membrane	GO:0046872//metal ion binding	-	gi|297739893|emb|CBI30075.3|/8.29735e-85/unnamed protein product [Vitis vinifera]
GSVIVT01026487001	1.75328	0.845285	K11228|1|8e-72|270|ota:Ot13g01170|mitogen-activated protein kinase kinase kinase [EC:2.7.11.1];K13414|2|3e-67|255|pop:POPTR_1071643|mitogen-activated protein kinase kinase kinase 1, plant [EC:2.7.11.25]	-	GO:0004672//protein kinase activity;GO:0032559	GO:0006464//cellular protein modification process	gi|296088548|emb|CBI37539.3|/0/unnamed protein product [Vitis vinifera]
GSVIVT01007183001	2.27746	0.800087	-	-	-	-	gi|225467749|ref|XP_002265070.1|/4.24668e-90/PREDICTED: uncharacterized protein LOC100267455 [Vitis vinifera]
GSVIVT01021518001	3.84072	0.808369	-	-	-	-	gi|225443892|ref|XP_002277952.1|/4.3726e-58/PREDICTED: protein TIFY 5A-like [Vitis vinifera]
GSVIVT01010052001	2.05427	0.846021	K00924|1|3e-139|494|aly:ARALYDRAFT_473063|[EC:2.7.1.-];K08286|4|4e-125|447|aly:ARALYDRAFT_491919|protein-serine/threonine kinase [EC:2.7.11.-]	-	GO:0004672//protein kinase activity	-	gi|302142780|emb|CBI19983.3|/0/unnamed protein product [Vitis vinifera]
GSVIVT01035829001	-3.50883	0.887997	-	GO:0043231//intracellular membrane-bounded organelle	GO:0046872//metal ion binding;GO:0001071//nucleic acid binding transcription factor activity;GO:0005515//protein binding;GO:0043566//structure-specific DNA binding	GO:0009411//response to UV;GO:0009640//photomorphogenesis;GO:0031325//positive regulation of cellular metabolic process;GO:0010476//gibberellin mediated signaling pathway;GO:0006351//transcription, DNA-dependent	gi|147844008|emb|CAN83322.1|/1.13561e-45/hypothetical protein VITISV_024883 [Vitis vinifera]
GSVIVT01038710001	2.54838	0.856488	-	GO:0009536//plastid	GO:0005488//binding;GO:0016301//kinase activity	-	gi|302144036|emb|CBI23141.3|/0/unnamed protein product [Vitis vinifera]
GSVIVT01020541001	-1.9627	0.864468	-	-	-	-	gi|225446347|ref|XP_002272559.1|/1.37885e-24/PREDICTED: uncharacterized protein LOC100262522 [Vitis vinifera]
GSVIVT01031946001	3.54891	0.809624	-	-	-	-	gi|147860025|emb|CAN83126.1|/8.69782e-75/hypothetical protein VITISV_015110 [Vitis vinifera]
GSVIVT01009241001	-1.31879	0.811527	K02492|1|0.0|845|vvi:100259052|glutamyl-tRNA reductase [EC:1.2.1.70]	GO:0009536//plastid	GO:0016620//oxidoreductase activity, acting on the aldehyde or oxo group of donors, NAD or NADP as acceptor;GO:0016616//oxidoreductase activity, acting on the CH-OH group of donors, NAD or NADP as acceptor;GO:0000166//nucleotide binding	GO:0009314//response to radiation;GO:0006779//porphyrin-containing compound biosynthetic process	gi|302142113|emb|CBI19316.3|/0/unnamed protein product [Vitis vinifera]
GSVIVT01015278001	4.6914	0.93417	-	GO:0005618//cell wall	-	-	gi|297738734|emb|CBI27979.3|/0/unnamed protein product [Vitis vinifera]
GSVIVT01001658001	-4.79266	0.877206	-	-	-	-	gi|296088100|emb|CBI35489.3|/7.20727e-84/unnamed protein product [Vitis vinifera]
GSVIVT01019646001	2.32196	0.80346	-	-	-	GO:0006810//transport	gi|297742430|emb|CBI34579.3|/0/unnamed protein product [Vitis vinifera]
GSVIVT01017042001	1.3018	0.810056	K09873|1|2e-83|306|ath:AT3G16240|aquaporin TIP;K09866|4|4e-75|278|sbi:SORBI_10g019360|aquaporin-4	GO:0031224//intrinsic to membrane	-	GO:0006810//transport	gi|124702533|gb|ABN14354.1|/1.4926e-108/aquaporin TIP2;1 [Vitis vinifera]
GSVIVT01011634001	1.78784	0.825865	K16055|1|0.0|1328|vvi:100252552|trehalose 6-phosphate synthase/phosphatase [EC:2.4.1.15 3.1.3.12]	-	GO:0019203//carbohydrate phosphatase activity;GO:0035251//UDP-glucosyltransferase activity	GO:0005991//trehalose metabolic process	gi|297737611|emb|CBI26812.3|/0/unnamed protein product [Vitis vinifera]
GSVIVT01025364001	-1.55516	0.817301	K10256|1|0.0|655|vvi:100258789|omega-6 fatty acid desaturase (delta-12 desaturase) [EC:1.14.19.-]	-	GO:0016705//oxidoreductase activity, acting on paired donors, with incorporation or reduction of molecular oxygen	GO:0044238//primary metabolic process	gi|297746402|emb|CBI16458.3|/0/unnamed protein product [Vitis vinifera]
GSVIVT01038031001	2.24081	0.827855	K00799|1|2e-84|310|gmx:547936|glutathione S-transferase [EC:2.5.1.18]	-	-	-	gi|359494423|ref|XP_003634776.1|/4.94922e-117/PREDICTED: probable glutathione S-transferase parC-like [Vitis vinifera]
GSVIVT01009159001	1.99159	0.813668	-	-	-	-	gi|302142050|emb|CBI19253.3|/4.89822e-94/unnamed protein product [Vitis vinifera]
GSVIVT01011714001	2.96954	0.884429	K01840|1|0.0|793|osa:4341038|phosphomannomutase [EC:5.4.2.8]	GO:0009536//plastid	GO:0016868//intramolecular transferase activity, phosphotransferases	GO:0044238//primary metabolic process	gi|225424281|ref|XP_002280911.1|/0/PREDICTED: phosphomannomutase/phosphoglucomutase [Vitis vinifera]
GSVIVT01022916001	2.6146	0.833975	-	-	-	-	gi|225447990|ref|XP_002270155.1|/0/PREDICTED: glutelin type-A 2 [Vitis vinifera]
GSVIVT01000017001	3.46561	0.902314	K04733|1|1e-80|298|smo:SELMODRAFT_33807|interleukin-1 receptor-associated kinase 4 [EC:2.7.11.1];K13430|2|9e-80|295|zma:100283091|serine/threonine-protein kinase PBS1 [EC:2.7.11.1]	-	GO:0004672//protein kinase activity;GO:0032559	GO:0006464//cellular protein modification process	gi|225451019|ref|XP_002281041.1|/0/PREDICTED: receptor-like serine/threonine-protein kinase ALE2 [Vitis vinifera]
GSVIVT01037778001	-3.19588	0.882915	-	-	-	-	gi|225460765|ref|XP_002274080.1|/1.33043e-46/PREDICTED: uncharacterized protein LOC100250451 [Vitis vinifera]
GSVIVT01020783001	4.10149	0.93311	K13993|1|9e-150|528|vvi:100267696|HSP20 family protein	-	-	-	gi|225446714|ref|XP_002282438.1|/1.16616e-148/PREDICTED: uncharacterized protein LOC100267696 [Vitis vinifera]
GSVIVT01006662001	2.78093	0.877422	K02705|1|4e-99|345|rcu:RCOM_ORF00030|photosystem II CP43 chlorophyll apoprotein	GO:0009521;GO:0031224//intrinsic to membrane;GO:0009534//chloroplast thylakoid	GO:0046906//tetrapyrrole binding;GO:0009055//electron carrier activity	GO:0006464//cellular protein modification process;GO:0009767//photosynthetic electron transport chain	gi|326457298|gb|ADZ74559.1|/3.22641e-98/photosystem II CP43 chlorophyll apoprotein [Gossypium longicalyx]
GSVIVT01018539001	4.7488	0.93404	K15397|1|6e-106|383|gmx:100816997|3-ketoacyl-CoA synthase [EC:2.3.1.-]	GO:0044464//cell part	GO:0016747//transferase activity, transferring acyl groups other than amino-acyl groups	GO:0006631//fatty acid metabolic process	gi|225455525|ref|XP_002267424.1|/0/PREDICTED: 3-ketoacyl-CoA synthase 5 [Vitis vinifera]
GSVIVT01000793001	5.67715	0.96981	-	-	-	-	gi|225446871|ref|XP_002283883.1|/1.30732e-29/PREDICTED: uncharacterized protein LOC100259123 [Vitis vinifera]
GSVIVT01026343001	2.60433	0.888776	K01206|1|2e-20|98.6|ath:AT1G67830|alpha-L-fucosidase [EC:3.2.1.51];K00514|3|4e-16|84.3|rcu:RCOM_1428040|zeta-carotene desaturase [EC:1.3.5.6]	-	GO:0016787//hydrolase activity	GO:0044238//primary metabolic process	gi|225430639|ref|XP_002268296.1|/0/PREDICTED: GDSL esterase/lipase At5g33370 [Vitis vinifera]
GSVIVT01003081001	1.38345	0.80346	-	-	-	-	gi|225448311|ref|XP_002264923.1|/2.42727e-125/PREDICTED: uncharacterized protein LOC100257088 [Vitis vinifera]
GSVIVT01026077001	2.14249	0.874892	-	GO:0031224//intrinsic to membrane	-	GO:0051234//establishment of localization	gi|225460394|ref|XP_002267428.1|/0/PREDICTED: patellin-5 isoform 1 [Vitis vinifera]
GSVIVT01016436001	1.86999	0.821583	-	-	-	-	gi|296086145|emb|CBI31586.3|/7.44292e-73/unnamed protein product [Vitis vinifera]
GSVIVT01025604001	4.33613	0.880796	-	-	-	-	gi|225439854|ref|XP_002278074.1|/2.29664e-28/PREDICTED: uncharacterized protein LOC100256772 [Vitis vinifera]
GSVIVT01000156001	1.37065	0.806293	-	GO:0005618//cell wall;GO:0005576//extracellular region	GO:0004175//endopeptidase activity;GO:0005515//protein binding	GO:0019538//protein metabolic process;GO:0010191;GO:0003006//developmental process involved in reproduction;GO:0044092//negative regulation of molecular function;GO:0009845//seed germination	gi|296087351|emb|CBI33725.3|/0/unnamed protein product [Vitis vinifera]
GSVIVT01001969001	-1.48262	0.829866	K08770|1|1e-65|139|vvi:100267431|ubiquitin C	GO:0043231//intracellular membrane-bounded organelle	-	GO:0043412//macromolecule modification;GO:0010033//response to organic substance;GO:0032502//developmental process	gi|297735959|emb|CBI23933.3|/8.28881e-68/unnamed protein product [Vitis vinifera]
GSVIVT01020411001	3.62464	0.882202	-	GO:0009536//plastid	-	-	gi|225462172|ref|XP_002267512.1|/1.07366e-121/PREDICTED: protein Iojap [Vitis vinifera]
GSVIVT01028042001	1.70514	0.800238	K01179|1|2e-168|591|sbi:SORBI_02g030710|endoglucanase [EC:3.2.1.4]	GO:0044464//cell part	GO:0004553//hydrolase activity, hydrolyzing O-glycosyl compounds	GO:0044238//primary metabolic process	gi|225437426|ref|XP_002271736.1|/0/PREDICTED: endoglucanase 17 [Vitis vinifera]
GSVIVT01035972001	2.62376	0.828893	-	-	GO:0046914//transition metal ion binding	-	gi|225430494|ref|XP_002285538.1|/2.21114e-94/PREDICTED: early nodulin-like protein 1 [Vitis vinifera]
GSVIVT01022245001	4.02634	0.81529	K13424|1|4e-23|106|pop:POPTR_577093|WRKY transcription factor 33	-	GO:0003677//DNA binding;GO:0001071//nucleic acid binding transcription factor activity	GO:0010467//gene expression	gi|296082517|emb|CBI21522.3|/1.48626e-88/unnamed protein product [Vitis vinifera]
GSVIVT01027961001	1.79765	0.854498	K00799|1|1e-43|174|vvi:100265903|glutathione S-transferase [EC:2.5.1.18]	GO:0009526//plastid envelope;GO:0009532//plastid stroma;GO:0031090//organelle membrane	GO:0042277//peptide binding;GO:0016765//transferase activity, transferring alkyl or aryl (other than methyl) groups	GO:0006952//defense response;GO:0006970//response to osmotic stress;GO:0009404//toxin metabolic process	gi|225437288|ref|XP_002262842.1|/1.34194e-42/PREDICTED: glutathione S-transferase [Vitis vinifera]
GSVIVT01008725001	-1.75381	0.839576	K00799|1|4e-126|449|vvi:100260869|glutathione S-transferase [EC:2.5.1.18]	-	GO:0016765//transferase activity, transferring alkyl or aryl (other than methyl) groups	-	gi|225459777|ref|XP_002285906.1|/4.78511e-125/PREDICTED: glutathione S-transferase PARB [Vitis vinifera]
GSVIVT01028103001	1.38295	0.808629	-	-	GO:0005515//protein binding	GO:0044267//cellular protein metabolic process;GO:0050896//response to stimulus	gi|225437529|ref|XP_002275599.1|/0/PREDICTED: uncharacterized protein LOC100264117 [Vitis vinifera]
GSVIVT01028244001	2.03037	0.820177	K13424|1|3e-22|105|rcu:RCOM_0849600|WRKY transcription factor 33	-	-	-	gi|297744083|emb|CBI37053.3|/0/unnamed protein product [Vitis vinifera]
GSVIVT01038035001	3.48855	0.860294	K00799|1|3e-89|326|gmx:547936|glutathione S-transferase [EC:2.5.1.18]	-	-	-	gi|225462609|ref|XP_002262767.1|/5.04462e-118/PREDICTED: probable glutathione S-transferase [Vitis vinifera]
GSVIVT01034964001	1.56108	0.801644	K00849|1|0.0|945|vvi:100244839|galactokinase [EC:2.7.1.6]	GO:0044424//intracellular part	GO:0016773//phosphotransferase activity, alcohol group as acceptor;GO:0032559	GO:0016310//phosphorylation;GO:0019318//hexose metabolic process	gi|225432012|ref|XP_002279647.1|/0/PREDICTED: galactokinase [Vitis vinifera]
GSVIVT01024199001	-2.10447	0.822924	-	GO:0009536//plastid	GO:0015291//secondary active transmembrane transporter activity	GO:0015893//drug transport	gi|225427734|ref|XP_002274783.1|/0/PREDICTED: MATE efflux family protein 4, chloroplastic-like [Vitis vinifera]
GSVIVT01032661001	2.43861	0.800843	K13426|1|6e-11|66.6|vvi:100251862|WRKY transcription factor 29;K13425|2|5e-10|63.5|ath:AT4G01250|WRKY transcription factor 22	-	-	-	gi|297736474|emb|CBI25345.3|/2.12083e-151/unnamed protein product [Vitis vinifera]
GSVIVT01020557001	-2.11222	0.817431	K10143|1|9e-86|315|pop:POPTR_1113820|E3 ubiquitin-protein ligase RFWD2 [EC:6.3.2.19]	GO:0043234//protein complex;GO:0044424//intracellular part	GO:0005515//protein binding;GO:0003824//catalytic activity	-	gi|359485383|ref|XP_002274192.2|/2.57542e-158/PREDICTED: protein SPA1-RELATED 3 [Vitis vinifera]
GSVIVT01031461001	-2.3996	0.861548	-	-	-	-	gi|297734896|emb|CBI17130.3|/5.1354e-119/unnamed protein product [Vitis vinifera]
GSVIVT01037653001	2.02267	0.861419	K03113|1|4e-55|213|vvi:100243506|translation initiation factor 1	-	GO:0008135//translation factor activity, nucleic acid binding	GO:0006412//translation	gi|225460971|ref|XP_002280065.1|/4.6836e-54/PREDICTED: protein translation factor SUI1 homolog isoform 1 [Vitis vinifera]
GSVIVT01000334001	-1.98028	0.815052	K01495|1|4e-106|383|vvi:100244016|GTP cyclohydrolase I [EC:3.5.4.16]	-	GO:0003933//GTP cyclohydrolase activity	GO:0008152//metabolic process	gi|225429269|ref|XP_002266199.1|/5.60902e-105/PREDICTED: uncharacterized protein LOC100244016 [Vitis vinifera]
GSVIVT01007593001	-2.0783	0.845285	K13428|1|1e-17|89.0|ath:AT5G20480|LRR receptor-like serine/threonine-protein kinase EFR [EC:2.7.11.1]	GO:0016020//membrane	GO:0004674//protein serine/threonine kinase activity;GO:0032559	GO:0006952//defense response;GO:0008219//cell death;GO:0007167//enzyme linked receptor protein signaling pathway;GO:0051093//negative regulation of developmental process;GO:0006464//cellular protein modification process	gi|297733660|emb|CBI14907.3|/0/unnamed protein product [Vitis vinifera]
GSVIVT01033388001	3.08545	0.89933	K00059|1|9e-24|107|vvi:100246875|3-oxoacyl-[acyl-carrier protein] reductase [EC:1.1.1.100]	-	GO:0003824//catalytic activity	GO:0010035//response to inorganic substance;GO:0008152//metabolic process	gi|297739748|emb|CBI29930.3|/4.04434e-64/unnamed protein product [Vitis vinifera]
GSVIVT01035911001	2.88711	0.815074	K09286|1|1e-12|72.4|rcu:RCOM_1034530|EREBP-like factor	-	-	GO:0050896//response to stimulus;GO:0050794//regulation of cellular process;GO:0010467//gene expression	gi|296082087|emb|CBI21092.3|/4.30685e-64/unnamed protein product [Vitis vinifera]
GSVIVT01001198001	-1.45898	0.825238	-	GO:0031224//intrinsic to membrane	GO:0015291//secondary active transmembrane transporter activity	GO:0015698//inorganic anion transport	gi|359479669|ref|XP_003632327.1|/0/PREDICTED: sulfate transporter 3.1-like [Vitis vinifera]
GSVIVT01018606001	5.82599	0.973097	K02355|1|3e-28|123|vvi:100257414|elongation factor G;K01051|2|3e-20|97.1|rcu:RCOM_0417480|pectinesterase [EC:3.1.1.11]	-	GO:0004091//carboxylesterase activity;GO:0030234//enzyme regulator activity	-	gi|225466065|ref|XP_002264028.1|/1.66759e-108/PREDICTED: 21 kDa protein [Vitis vinifera]
GSVIVT01031578001	2.83755	0.90026	K08235|1|1e-110|397|vvi:100263523|xyloglucan:xyloglucosyl transferase [EC:2.4.1.207]	GO:0005576//extracellular region;GO:0030312//external encapsulating structure	GO:0016798//hydrolase activity, acting on glycosyl bonds;GO:0016758//transferase activity, transferring hexosyl groups	GO:0044042//glucan metabolic process	gi|225463319|ref|XP_002267838.1|/2.23049e-118/PREDICTED: brassinosteroid-regulated protein BRU1 [Vitis vinifera]
GSVIVT01019849001	1.98431	0.822772	-	-	-	-	gi|297742591|emb|CBI34740.3|/3.03623e-134/unnamed protein product [Vitis vinifera]
GSVIVT01032509001	3.63007	0.805904	-	GO:0044464//cell part	-	-	gi|225452524|ref|XP_002279776.1|/0/PREDICTED: auxin-induced protein 5NG4 [Vitis vinifera]
GSVIVT01025798001	2.49376	0.844204	-	GO:0044464//cell part	-	-	gi|225440165|ref|XP_002283348.1|/0/PREDICTED: auxin-induced protein 5NG4 isoform 1 [Vitis vinifera]
GSVIVT01008423001	1.34167	0.800908	-	GO:0044464//cell part	-	GO:0009607//response to biotic stimulus	gi|147818820|emb|CAN59843.1|/4.74021e-144/hypothetical protein VITISV_030359 [Vitis vinifera]
GSVIVT01008752001	-1.64347	0.821151	-	-	-	GO:0050794//regulation of cellular process	gi|302141722|emb|CBI18925.3|/5.39731e-139/unnamed protein product [Vitis vinifera]
GSVIVT01001863001	-3.43524	0.907937	K01177|1|0.0|764|vvi:100242636|beta-amylase [EC:3.2.1.2]	GO:0043231//intracellular membrane-bounded organelle;GO:0044444//cytoplasmic part;GO:0016020//membrane	GO:0016772//transferase activity, transferring phosphorus-containing groups;GO:0016160//amylase activity;GO:0005102//receptor binding;GO:0043167//ion binding;GO:0032559	GO:0005982//starch metabolic process;GO:0009933//meristem structural organization;GO:0007167//enzyme linked receptor protein signaling pathway;GO:0010073//meristem maintenance;GO:0003006//developmental process involved in reproduction;GO:0006950//response to stress;GO:0006464//cellular protein modification process	gi|296088264|emb|CBI35772.3|/0/unnamed protein product [Vitis vinifera]
GSVIVT01031207001	3.98575	0.921778	K09510|1|4e-14|77.0|smo:SELMODRAFT_142303|DnaJ homolog subfamily B member 4	-	GO:0005515//protein binding	GO:0044267//cellular protein metabolic process;GO:0050896//response to stimulus	gi|359487530|ref|XP_003633609.1|/6.6429e-68/PREDICTED: chaperone protein DnaJ-like [Vitis vinifera]
GSVIVT01025724001	-1.63022	0.831142	K13692|1|1e-44|179|pop:POPTR_587034|UDP-glucose:(indol-3-yl)acetate beta-D-glucosyltransferase [EC:2.4.1.121];K13691|2|3e-44|177|rcu:RCOM_0101360|pathogen-inducible salicylic acid glucosyltransferase [EC:2.4.1.-];K13068|5|4e-43|174|aly:ARALYDRAFT_479675|sinapate 1-glucosyltransferase [EC:2.4.1.120]	-	GO:0016757//transferase activity, transferring glycosyl groups	-	gi|297741634|emb|CBI32766.3|/0/unnamed protein product [Vitis vinifera]
GSVIVT01034001001	-1.82621	0.816025	K12134|1|9e-06|49.3|aly:ARALYDRAFT_904154|circadian clock associated 1	GO:0043231//intracellular membrane-bounded organelle	GO:0003676//nucleic acid binding;GO:0001071//nucleic acid binding transcription factor activity	GO:0006351//transcription, DNA-dependent	gi|297740240|emb|CBI30422.3|/6.95799e-122/unnamed protein product [Vitis vinifera]
GSVIVT01003139001	4.41073	0.883391	K11251|1|2e-59|226|vvi:100257988|histone H2A	GO:0043231//intracellular membrane-bounded organelle;GO:0000785//chromatin	GO:0003676//nucleic acid binding	GO:0006952//defense response;GO:0009266//response to temperature stimulus;GO:0009791//post-embryonic development;GO:0034728//nucleosome organization	gi|225437178|ref|XP_002281266.1|/2.99264e-58/PREDICTED: histone H2A variant 1 [Vitis vinifera]
GSVIVT01012727001	1.49164	0.832483	K00430|1|5e-151|363|vvi:100241814|peroxidase [EC:1.11.1.7]	-	GO:0005506//iron ion binding;GO:0003824//catalytic activity;GO:0016209//antioxidant activity	GO:0008152//metabolic process;GO:0006950//response to stress	gi|225444515|ref|XP_002274769.1|/5.91677e-150/PREDICTED: peroxidase 42 isoform 1 [Vitis vinifera]
GSVIVT01036671001	4.42587	0.934991	K00924|1|3e-19|95.1|aly:ARALYDRAFT_489138|[EC:2.7.1.-]	GO:0005618//cell wall	GO:0004175//endopeptidase activity	GO:0019538//protein metabolic process	gi|225465837|ref|XP_002264626.1|/0/PREDICTED: aspartic proteinase nepenthesin-1-like isoform 1 [Vitis vinifera]
GSVIVT01015859001	1.97545	0.813495	K13263|1|9e-56|216|gmx:100101902|isoflavone 7-O-glucosyltransferase [EC:2.4.1.170];K08237|2|2e-52|205|vvi:100246482|hydroquinone glucosyltransferase [EC:2.4.1.218]	-	GO:0016757//transferase activity, transferring glycosyl groups	-	gi|225464772|ref|XP_002265935.1|/0/PREDICTED: putative UDP-glucose flavonoid 3-O-glucosyltransferase 3 [Vitis vinifera]
GSVIVT01028041001	1.91063	0.841414	K01051|1|0.0|909|vvi:100245304|pectinesterase [EC:3.1.1.11]	-	GO:0016788//hydrolase activity, acting on ester bonds	-	gi|297743913|emb|CBI36883.3|/0/unnamed protein product [Vitis vinifera]
GSVIVT01013935001	1.83341	0.853525	K09286|1|1e-37|155|vvi:100254616|EREBP-like factor	-	-	-	gi|225455050|ref|XP_002282181.1|/2.08349e-82/PREDICTED: ethylene-responsive transcription factor 5 [Vitis vinifera]
GSVIVT01017279001	-1.96835	0.811938	K01184|1|3e-95|347|rcu:RCOM_0968450|polygalacturonase [EC:3.2.1.15]	-	GO:0004553//hydrolase activity, hydrolyzing O-glycosyl compounds	GO:0008152//metabolic process	gi|297743417|emb|CBI36284.3|/0/unnamed protein product [Vitis vinifera]
GSVIVT01016733001	-3.04361	0.900627	-	-	-	-	gi|297742986|emb|CBI35853.3|/2.68973e-113/unnamed protein product [Vitis vinifera]
GSVIVT01006576001	-2.47026	0.877682	K04708|1|2e-07|55.5|cre:CHLREDRAFT_55666|3-dehydrosphinganine reductase [EC:1.1.1.102];K00059|3|2e-06|51.6|bdi:100843198|3-oxoacyl-[acyl-carrier protein] reductase [EC:1.1.1.100]	-	GO:0003824//catalytic activity	GO:0008152//metabolic process	gi|297739381|emb|CBI29397.3|/7.09682e-161/unnamed protein product [Vitis vinifera]
GSVIVT01001422001	2.12136	0.824762	K14548|1|5e-166|582|rcu:RCOM_0962120|U3 small nucleolar RNA-associated protein 4	-	GO:0048037//cofactor binding;GO:0016846//carbon-sulfur lyase activity	-	gi|225470836|ref|XP_002266138.1|/0/PREDICTED: tryptophan aminotransferase-related protein 4 [Vitis vinifera]
GSVIVT01014333001	-1.41698	0.811246	K10143|1|6e-146|363|vvi:100258898|E3 ubiquitin-protein ligase RFWD2 [EC:6.3.2.19]	GO:0031234//extrinsic to internal side of plasma membrane;GO:0031461//cullin-RING ubiquitin ligase complex	GO:0016301//kinase activity;GO:0005515//protein binding;GO:0016628//oxidoreductase activity, acting on the CH-CH group of donors, NAD or NADP as acceptor;GO:0032559	GO:0006464//cellular protein modification process	gi|359493656|ref|XP_002282441.2|/4.53101e-150/PREDICTED: protein SPA1-RELATED 3-like [Vitis vinifera]
GSVIVT01003175001	1.96564	0.837933	K14505|1|5e-165|579|vvi:100264093|cyclin D3, plant	GO:0043231//intracellular membrane-bounded organelle	-	GO:0009987//cellular process	gi|296090459|emb|CBI40278.3|/1.31149e-167/unnamed protein product [Vitis vinifera]
GSVIVT01031147001	1.84109	0.810402	-	-	-	-	gi|296089702|emb|CBI39521.3|/1.75472e-66/unnamed protein product [Vitis vinifera]
GSVIVT01029443001	-1.66209	0.841998	K15891|1|2e-07|56.2|ppp:PHYPADRAFT_193687|farnesol dehydrogenase [EC:1.1.1.216]	GO:0009526//plastid envelope	-	GO:0006412//translation	gi|225443490|ref|XP_002274181.1|/0/PREDICTED: uncharacterized protein LOC100256501 isoform 1 [Vitis vinifera]
GSVIVT01024785001	-2.20517	0.876665	-	-	-	-	gi|147856054|emb|CAN78614.1|/2.20678e-20/hypothetical protein VITISV_028924 [Vitis vinifera]
GSVIVT01001971001	-1.42252	0.825065	K08770|1|6e-140|495|mtr:MTR_8g018230|ubiquitin C	GO:0044424//intracellular part	-	GO:0043412//macromolecule modification;GO:0010033//response to organic substance;GO:0032502//developmental process	gi|413935668|gb|AFW70219.1|/9.75374e-142/polyubiquitin-like protein [Zea mays]
GSVIVT01003906001	3.27735	0.837716	-	-	-	-	gi|225470222|ref|XP_002270549.1|/5.74644e-110/PREDICTED: F-box protein PP2-B1 [Vitis vinifera]
GSVIVT01014263001	2.66493	0.858737	-	GO:0009534//chloroplast thylakoid	-	-	gi|225461564|ref|XP_002282834.1|/8.11717e-135/PREDICTED: uncharacterized protein LOC100267434 [Vitis vinifera]
GSVIVT01006166001	1.28547	0.802617	K01610|1|4e-90|329|gmx:100791015|phosphoenolpyruvate carboxykinase (ATP) [EC:4.1.1.49]	GO:0044424//intracellular part	GO:0004611//phosphoenolpyruvate carboxykinase activity;GO:0032559	GO:0006006//glucose metabolic process	gi|296083583|emb|CBI23572.3|/8.99164e-123/unnamed protein product [Vitis vinifera]
GSVIVT01011185001	1.57629	0.800389	K01490|1|0.0|1712|vvi:100252323|AMP deaminase [EC:3.5.4.6]	GO:0043231//intracellular membrane-bounded organelle;GO:0044444//cytoplasmic part	GO:0016814//hydrolase activity, acting on carbon-nitrogen (but not peptide) bonds, in cyclic amidines;GO:0019901//protein kinase binding	GO:0009725//response to hormone stimulus;GO:0009127//purine nucleoside monophosphate biosynthetic process;GO:0003006//developmental process involved in reproduction	gi|296083176|emb|CBI22812.3|/0/unnamed protein product [Vitis vinifera]
GSVIVT01022036001	-3.05039	0.88551	-	-	-	-	gi|298205033|emb|CBI34340.3|/2.22483e-41/unnamed protein product [Vitis vinifera]
GSVIVT01029165001	6.69912	0.89282	K08235|1|7e-162|568|vvi:100246166|xyloglucan:xyloglucosyl transferase [EC:2.4.1.207];K14504|3|2e-142|503|vvi:100256520|xyloglucan:xyloglucosyl transferase TCH4 [EC:2.4.1.207]	GO:0005576//extracellular region;GO:0030312//external encapsulating structure	GO:0016798//hydrolase activity, acting on glycosyl bonds;GO:0016758//transferase activity, transferring hexosyl groups	GO:0044042//glucan metabolic process	gi|225446113|ref|XP_002274601.1|/8.74124e-161/PREDICTED: probable xyloglucan endotransglucosylase/hydrolase protein 23 [Vitis vinifera]
GSVIVT01024994001	-1.35686	0.800303	K03283|1|5e-119|426|ath:AT5G02500|heat shock 70kDa protein 1/8	GO:0005840//ribosome;GO:0030312//external encapsulating structure;GO:0031981//nuclear lumen;GO:0009536//plastid;GO:0031090//organelle membrane;GO:0005576//extracellular region	GO:0019899//enzyme binding	GO:0006952//defense response;GO:0051707//response to other organism;GO:0010038//response to metal ion;GO:0008152//metabolic process	gi|297746101|emb|CBI16157.3|/3.16065e-125/unnamed protein product [Vitis vinifera]
GSVIVT01011382001	2.91939	0.87846	K07374|1|0.0|685|vvi:100247366|tubulin alpha	GO:0032991//macromolecular complex;GO:0015630//microtubule cytoskeleton	GO:0017111//nucleoside-triphosphatase activity;GO:0032561//guanyl ribonucleotide binding	GO:0043623//cellular protein complex assembly;GO:0009207;GO:0007017//microtubule-based process	gi|296082889|emb|CBI22190.3|/0/unnamed protein product [Vitis vinifera]
GSVIVT01012848001	-1.56311	0.810921	K08193|1|6e-36|140|cme:CMP354C|MFS transporter, ACS family, solute carrier family 17 (sodium-dependent inorganic phosphate cotransporter), other;K12303|5|4e-23|106|cre:CHLREDRAFT_78631|MFS transporter, ACS family, solute carrier family 17 (sodium-dependent inorganic phosphate cotransporter), member 9	-	-	GO:0006810//transport	gi|296084538|emb|CBI25559.3|/2.68231e-151/unnamed protein product [Vitis vinifera]
GSVIVT01007122001	3.28687	0.848486	K00422|1|0.0|670|vvi:100256583|polyphenol oxidase [EC:1.10.3.1]	GO:0009507//chloroplast;GO:0009579//thylakoid	GO:0016491//oxidoreductase activity	GO:0006810//transport;GO:0008152//metabolic process	gi|1172587|sp|P43311.1|PPO_VITVI/0/RecName: Full=Polyphenol oxidase, chloroplastic; Short=PPO; AltName: Full=Catechol oxidase; Flags: Precursor
GSVIVT01027064001	-1.27108	0.803222	K08237|1|0.0|897|vvi:100246482|hydroquinone glucosyltransferase [EC:2.4.1.218]	-	GO:0035251//UDP-glucosyltransferase activity	GO:0006970//response to osmotic stress;GO:0006805//xenobiotic metabolic process	gi|225454475|ref|XP_002280923.1|/0/PREDICTED: hydroquinone glucosyltransferase [Vitis vinifera]
GSVIVT01021078001	-1.65481	0.805104	-	GO:0043231//intracellular membrane-bounded organelle	GO:0016538//cyclin-dependent protein kinase regulator activity;GO:0016772//transferase activity, transferring phosphorus-containing groups	GO:0006796//phosphate-containing compound metabolic process;GO:0022402//cell cycle process	gi|298205264|emb|CBI17323.3|/5.49546e-88/unnamed protein product [Vitis vinifera]
GSVIVT01027424001	1.97465	0.825887	K15397|1|0.0|970|vvi:100247295|3-ketoacyl-CoA synthase [EC:2.3.1.-]	GO:0005840//ribosome;GO:0043231//intracellular membrane-bounded organelle	GO:0005488//binding;GO:0004312//fatty acid synthase activity	GO:0006633//fatty acid biosynthetic process;GO:0009314//response to radiation;GO:0007275//multicellular organismal development;GO:0006950//response to stress	gi|296088997|emb|CBI38700.3|/0/unnamed protein product [Vitis vinifera]
GSVIVT01013705001	3.83923	0.829758	K00924|1|8e-84|310|ath:AT1G75820|[EC:2.7.1.-]	-	GO:0016740//transferase activity	-	gi|297739375|emb|CBI29365.3|/0/unnamed protein product [Vitis vinifera]
GSVIVT01009779001	4.66841	0.810229	-	GO:0043231//intracellular membrane-bounded organelle	GO:0003677//DNA binding;GO:0001071//nucleic acid binding transcription factor activity	GO:0006351//transcription, DNA-dependent	gi|225458165|ref|XP_002281033.1|/0/PREDICTED: BEL1-like homeodomain protein 11 [Vitis vinifera]
GSVIVT01012640001	-1.61091	0.814728	-	GO:0044424//intracellular part	-	GO:0000904//cell morphogenesis involved in differentiation	gi|225444367|ref|XP_002266933.1|/4.13144e-64/PREDICTED: uncharacterized protein LOC100258839 [Vitis vinifera]
GSVIVT01010311001	-2.90893	0.891458	K02892|1|2e-30|128|vvi:4025136|large subunit ribosomal protein L23	GO:0030529//ribonucleoprotein complex;GO:0009536//plastid	GO:0003723//RNA binding;GO:0005198//structural molecule activity	GO:0010467//gene expression	gi|297738334|emb|CBI27535.3|/6.22129e-32/unnamed protein product [Vitis vinifera]
GSVIVT01007610001	-2.14538	0.821605	K00517|1|4e-126|449|ath:AT4G13310|[EC:1.14.-.-]	-	GO:0004497//monooxygenase activity;GO:0005506//iron ion binding	-	gi|297733673|emb|CBI14920.3|/0/unnamed protein product [Vitis vinifera]
GSVIVT01030403001	1.89218	0.862413	-	-	-	-	gi|225446977|ref|XP_002265274.1|/1.11487e-23/PREDICTED: uncharacterized protein LOC100249881 [Vitis vinifera]
GSVIVT01035692001	9.78002	0.825692	-	-	-	-	gi|359476054|ref|XP_003631782.1|/1.33938e-147/PREDICTED: LOW QUALITY PROTEIN: BURP domain-containing protein 3-like [Vitis vinifera]
GSVIVT01038047001	6.91933	0.940376	K00799|1|2e-72|270|gmx:547936|glutathione S-transferase [EC:2.5.1.18]	-	-	-	gi|225462626|ref|XP_002264703.1|/1.90758e-128/PREDICTED: probable glutathione S-transferase parA [Vitis vinifera]
GSVIVT01032858001	1.99092	0.854455	-	-	-	GO:0042742//defense response to bacterium;GO:0010033//response to organic substance	gi|297736638|emb|CBI25509.3|/0/unnamed protein product [Vitis vinifera]
GSVIVT01003222001	1.92887	0.845004	-	-	-	-	gi|296087796|emb|CBI35052.3|/0/unnamed protein product [Vitis vinifera]
GSVIVT01035331001	2.02824	0.865441	K15172|1|2e-27|121|vcn:VOLCADRAFT_106802|transcription elongation factor SPT5	-	-	-	gi|296081599|emb|CBI20604.3|/0/unnamed protein product [Vitis vinifera]
GSVIVT01000846001	2.28551	0.805623	-	-	-	-	gi|359495088|ref|XP_002266452.2|/8.02357e-90/PREDICTED: disease resistance response protein 206-like [Vitis vinifera]
GSVIVT01012712001	-3.52827	0.920588	K05907|1|2e-162|570|aly:ARALYDRAFT_911717|adenylyl-sulfate reductase (glutathione) [EC:1.8.4.9]	-	GO:0016671//oxidoreductase activity, acting on a sulfur group of donors, disulfide as acceptor	GO:0006790//sulfur compound metabolic process;GO:0019725//cellular homeostasis	gi|302144128|emb|CBI23233.3|/0/unnamed protein product [Vitis vinifera]
GSVIVT01024815001	2.70698	0.803741	K04802|1|4e-148|522|vvi:100248466|proliferating cell nuclear antigen	GO:0043234//protein complex;GO:0043231//intracellular membrane-bounded organelle	GO:0003676//nucleic acid binding;GO:0030234//enzyme regulator activity	GO:0006260//DNA replication	gi|225434712|ref|XP_002281090.1|/5.24302e-147/PREDICTED: proliferating cell nuclear antigen [Vitis vinifera]
GSVIVT01037507001	2.44292	0.842474	K13754|1|4e-124|443|vvi:100261580|solute carrier family 24 (sodium/potassium/calcium exchanger), member 6	-	-	-	gi|296084002|emb|CBI24390.3|/0/unnamed protein product [Vitis vinifera]
GSVIVT01005680001	1.81205	0.844183	K08054|1|4e-62|235|vvi:100259611|calnexin	GO:0044444//cytoplasmic part;GO:0043229//intracellular organelle	-	-	gi|296088153|emb|CBI35623.3|/7.87222e-95/unnamed protein product [Vitis vinifera]
GSVIVT01027876001	1.80572	0.805796	K14638|1|1e-149|528|ppp:PHYPADRAFT_134814|solute carrier family 15 (peptide/histidine transporter), member 3/4	GO:0044464//cell part	GO:0015198//oligopeptide transporter activity	GO:0009725//response to hormone stimulus;GO:0043200//response to amino acid stimulus;GO:0006952//defense response;GO:0006857//oligopeptide transport;GO:0006972//hyperosmotic response	gi|225433219|ref|XP_002285402.1|/0/PREDICTED: peptide transporter PTR3-A [Vitis vinifera]
GSVIVT01019302001	1.6292	0.814057	-	-	-	-	gi|225436208|ref|XP_002268337.1|/1.03603e-155/PREDICTED: uncharacterized protein LOC100245378 [Vitis vinifera]
GSVIVT01013355001	-1.61399	0.808456	K00030|1|5e-155|546|vvi:100242228|isocitrate dehydrogenase (NAD+) [EC:1.1.1.41];K09588|2|8e-73|273|gmx:100775886|cytochrome P450, family 90, subfamily A, polypeptide 1 [EC:1.14.-.-];K12640|4|2e-71|268|vvi:100232983|cytochrome P450, family 85, subfamily A, polypeptide 2 (brassinosteroid-6-oxidase 2) [EC:1.14.-.-]	-	GO:0005506//iron ion binding;GO:0004497//monooxygenase activity	GO:0008152//metabolic process	gi|297745539|emb|CBI40704.3|/0/unnamed protein product [Vitis vinifera]
GSVIVT01035098001	3.14405	0.877422	K09286|1|8e-31|132|ath:AT3G16770|EREBP-like factor	GO:0043231//intracellular membrane-bounded organelle	GO:0003676//nucleic acid binding;GO:0001071//nucleic acid binding transcription factor activity	GO:0006351//transcription, DNA-dependent	gi|225431800|ref|XP_002272426.1|/1.61586e-110/PREDICTED: ethylene-responsive transcription factor RAP2-3 [Vitis vinifera]
GSVIVT01015090001	1.73859	0.830688	K06685|1|6e-125|445|vvi:100245566|maintenance of ploidy protein MOB1 (MPS1 binder 1)	GO:0043231//intracellular membrane-bounded organelle	GO:0016772//transferase activity, transferring phosphorus-containing groups	GO:0006796//phosphate-containing compound metabolic process	gi|225444750|ref|XP_002279119.1|/7.8778e-124/PREDICTED: mps one binder kinase activator-like 1 [Vitis vinifera]
GSVIVT01032681001	-2.11751	0.87593	-	GO:0044464//cell part	-	-	gi|29421120|dbj|BAC66695.1|/2.38329e-138/expansin [Vitis labrusca x Vitis vinifera]
GSVIVT01011015001	-1.51057	0.821583	-	GO:0044464//cell part	GO:0005100//Rho GTPase activator activity	GO:0023052//signaling	gi|225436823|ref|XP_002270566.1|/0/PREDICTED: uncharacterized protein LOC100252743 [Vitis vinifera]
GSVIVT01035113001	2.13784	0.826276	-	GO:0042579//microbody	GO:0016803;GO:0016740//transferase activity	-	gi|359477248|ref|XP_002270883.2|/0/PREDICTED: epoxide hydrolase 2 [Vitis vinifera]
GSVIVT01026586001	-2.33521	0.870523	-	GO:0009536//plastid	-	-	gi|225431593|ref|XP_002276832.1|/1.06534e-147/PREDICTED: probable plastid-lipid-associated protein 7, chloroplastic [Vitis vinifera]
GSVIVT01019758001	1.89354	0.856596	K07375|1|8e-149|525|gmx:100819408|tubulin beta	GO:0032991//macromolecular complex;GO:0005856//cytoskeleton	GO:0000166//nucleotide binding	GO:0007017//microtubule-based process	gi|297742524|emb|CBI34673.3|/2.09718e-164/unnamed protein product [Vitis vinifera]
GSVIVT01019398001	-1.83736	0.845112	-	-	-	-	gi|297742223|emb|CBI34372.3|/0/unnamed protein product [Vitis vinifera]
GSVIVT01033641001	2.78532	0.81276	K05546|1|1e-20|100|olu:OSTLU_429|alpha 1,3-glucosidase [EC:3.2.1.84]	GO:0043231//intracellular membrane-bounded organelle	GO:0004558//alpha-glucosidase activity;GO:0005488//binding	GO:0044238//primary metabolic process	gi|297739952|emb|CBI30134.3|/0/unnamed protein product [Vitis vinifera]
GSVIVT01000538001	-1.69597	0.815614	K11982|1|1e-06|52.0|bdi:100838213|E3 ubiquitin-protein ligase RNF115/126 [EC:6.3.2.19];K13148|2|1e-06|51.6|rcu:RCOM_0598050|integrator complex subunit 11 [EC:3.1.27.-]	-	GO:0046914//transition metal ion binding	-	gi|359473106|ref|XP_003631250.1|/5.27273e-78/PREDICTED: E3 ubiquitin-protein ligase AIP2-like [Vitis vinifera]
GSVIVT01021714001	1.87009	0.843469	-	GO:0043231//intracellular membrane-bounded organelle	GO:0046914//transition metal ion binding;GO:0004497//monooxygenase activity	GO:0009411//response to UV;GO:0012501//programmed cell death;GO:0006631//fatty acid metabolic process;GO:0009699//phenylpropanoid biosynthetic process	gi|297740876|emb|CBI31058.3|/6.58393e-164/unnamed protein product [Vitis vinifera]
GSVIVT01037727001	2.73063	0.884061	-	GO:0055028//cortical microtubule	GO:0015631//tubulin binding	GO:0022403;GO:0030865//cortical cytoskeleton organization;GO:0031112	gi|297737498|emb|CBI26699.3|/0/unnamed protein product [Vitis vinifera]
GSVIVT01016577001	-1.71629	0.841306	K11254|1|4e-26|115|mtr:MTR_2g096100|histone H4	GO:0000785//chromatin;GO:0031090//organelle membrane;GO:0009536//plastid	GO:0003676//nucleic acid binding	GO:0034728//nucleosome organization	gi|296086257|emb|CBI31698.3|/1.74163e-30/unnamed protein product [Vitis vinifera]
GSVIVT01017644001	-3.83354	0.925411	K01184|1|1e-102|372|rcu:RCOM_1063390|polygalacturonase [EC:3.2.1.15]	-	GO:0004553//hydrolase activity, hydrolyzing O-glycosyl compounds	GO:0044238//primary metabolic process;GO:0045229//external encapsulating structure organization	gi|225432118|ref|XP_002263668.1|/0/PREDICTED: polygalacturonase At1g48100-like [Vitis vinifera]
GSVIVT01011480001	-2.22319	0.878179	K07735|1|1e-103|374|gmx:100783218|putative transcriptional regulator	GO:0009507//chloroplast	-	-	gi|296082969|emb|CBI22270.3|/4.44381e-149/unnamed protein product [Vitis vinifera]
GSVIVT01009432001	1.95736	0.832894	K14505|1|1e-96|352|vvi:100264093|cyclin D3, plant	GO:0043231//intracellular membrane-bounded organelle	-	GO:0009987//cellular process	gi|225458713|ref|XP_002285001.1|/2.26306e-177/PREDICTED: cyclin-D3-1 [Vitis vinifera]
GSVIVT01038203001	2.32973	0.812738	K13691|1|4e-136|483|vvi:100242294|pathogen-inducible salicylic acid glucosyltransferase [EC:2.4.1.-]	-	GO:0016757//transferase activity, transferring glycosyl groups	-	gi|225434168|ref|XP_002275170.1|/4.94845e-135/PREDICTED: UDP-glycosyltransferase 74F2 [Vitis vinifera]
GSVIVT01006115001	-1.92214	0.843382	-	GO:0009536//plastid	-	-	gi|147819041|emb|CAN71628.1|/8.76884e-82/hypothetical protein VITISV_015578 [Vitis vinifera]
GSVIVT01022015001	-1.64566	0.824221	K09291|1|7e-10|64.3|gmx:100811882|nucleoprotein TPR;K06675|2|3e-06|52.4|bdi:100831033|structural maintenance of chromosome 4	-	-	-	gi|225451092|ref|XP_002264214.1|/0/PREDICTED: uncharacterized protein LOC100262311 [Vitis vinifera]
GSVIVT01014246001	4.62557	0.918188	K14431|1|7e-06|50.4|sbi:SORBI_08g003260|transcription factor TGA	-	GO:0005488//binding	-	gi|359493805|ref|XP_002285311.2|/3.19319e-138/PREDICTED: uncharacterized protein LOC100258873 [Vitis vinifera]
GSVIVT01010060001	1.50715	0.821302	K01246|1|0.0|673|vvi:100256507|DNA-3-methyladenine glycosylase I [EC:3.2.2.20]	-	GO:0003905//alkylbase DNA N-glycosylase activity	GO:0006281//DNA repair	gi|225424952|ref|XP_002263612.1|/0/PREDICTED: uncharacterized protein LOC100256507 [Vitis vinifera]
GSVIVT01017471001	1.68294	0.821994	-	GO:0000229;GO:0009532//plastid stroma	-	-	gi|359482400|ref|XP_002268800.2|/0/PREDICTED: COBW domain-containing protein 2-like isoform 1 [Vitis vinifera]
GSVIVT01034194001	-1.58742	0.838019	K03283|1|7e-12|67.8|vvi:100259551|heat shock 70kDa protein 1/8;K09490|3|7e-12|67.8|ath:AT5G42020|heat shock 70kDa protein 5	GO:0043231//intracellular membrane-bounded organelle	GO:0032559	GO:0050896//response to stimulus	gi|297740391|emb|CBI30573.3|/2.18078e-34/unnamed protein product [Vitis vinifera]
GSVIVT01020678001	1.28889	0.806012	-	-	-	-	gi|302143397|emb|CBI21958.3|/5.43506e-151/unnamed protein product [Vitis vinifera]
GSVIVT01028789001	2.96243	0.856574	-	GO:0031224//intrinsic to membrane	-	GO:0006810//transport	gi|359490578|ref|XP_002275623.2|/0/PREDICTED: S-type anion channel SLAH3-like [Vitis vinifera]
GSVIVT01008595001	2.85559	0.829866	K15382|1|3e-147|519|vvi:100267921|solute carrier family 50 (sugar transporter)	GO:0031224//intrinsic to membrane	-	GO:0071702	gi|225456416|ref|XP_002284244.1|/3.84202e-146/PREDICTED: bidirectional sugar transporter SWEET10 [Vitis vinifera]
GSVIVT01027437001	-2.47604	0.880061	K13679|1|0.0|1162|vvi:100243677|granule-bound starch synthase [EC:2.4.1.242]	GO:0009536//plastid	GO:0046527//glucosyltransferase activity	GO:0005977//glycogen metabolic process	gi|225466653|ref|XP_002273608.1|/0/PREDICTED: granule-bound starch synthase 1, chloroplastic/amyloplastic [Vitis vinifera]
GSVIVT01023795001	1.77571	0.841998	K00224|1|2e-127|454|aly:ARALYDRAFT_476671|[EC:1.3.1.-];K13081|3|1e-71|268|vvi:100233112|leucoanthocyanidin reductase [EC:1.17.1.3]	-	-	-	gi|225428436|ref|XP_002283953.1|/1.37414e-171/PREDICTED: isoflavone reductase homolog [Vitis vinifera]
GSVIVT01033705001	-2.14705	0.802163	K03457|1|2e-164|577|ath:AT5G03555|nucleobase:cation symporter-1, NCS1 family	GO:0044464//cell part	GO:0015932//nucleobase-containing compound transmembrane transporter activity	GO:0015931//nucleobase-containing compound transport	gi|297740002|emb|CBI30184.3|/0/unnamed protein product [Vitis vinifera]
GSVIVT01031267001	-2.75228	0.85199	-	-	-	-	gi|296089802|emb|CBI39621.3|/0/unnamed protein product [Vitis vinifera]
GSVIVT01028023001	2.84168	0.801557	K05849|1|8e-29|127|cre:CHLREDRAFT_192884|solute carrier family 8 (sodium/calcium exchanger);K13752|3|3e-19|95.1|ota:Ot11g02640|solute carrier family 24 (sodium/potassium/calcium exchanger), member 4	GO:0031090//organelle membrane;GO:0031224//intrinsic to membrane	GO:0015298//solute:cation antiporter activity	GO:0070838//divalent metal ion transport;GO:0000041//transition metal ion transport	gi|359479914|ref|XP_002268148.2|/0/PREDICTED: uncharacterized protein LOC100250295 [Vitis vinifera]
GSVIVT01024060001	1.62298	0.842301	-	-	GO:0004620//phospholipase activity;GO:0042578//phosphoric ester hydrolase activity	GO:0044238//primary metabolic process;GO:0007165//signal transduction	gi|297744640|emb|CBI37902.3|/9.14023e-91/unnamed protein product [Vitis vinifera]
GSVIVT01025544001	-1.57639	0.82247	K12133|1|7e-28|123|ath:AT1G01060|LATE ELONGATED HYPOCOTYL;K12134|2|3e-27|120|aly:ARALYDRAFT_904154|circadian clock associated 1	GO:0043231//intracellular membrane-bounded organelle	GO:0003676//nucleic acid binding;GO:0001071//nucleic acid binding transcription factor activity	GO:0010038//response to metal ion;GO:0009725//response to hormone stimulus;GO:0048511//rhythmic process;GO:0006970//response to osmotic stress;GO:0006351//transcription, DNA-dependent	gi|225439763|ref|XP_002275037.1|/1.27678e-166/PREDICTED: transcription factor ASG4-like [Vitis vinifera]
GSVIVT01018044001	-4.43203	0.940095	-	-	-	-	gi|295442600|gb|ADG21226.1|/1.09688e-83/chloroplast ELIP early light-induced protein [Vitis vinifera]
GSVIVT01006795001	3.44113	0.856185	-	-	-	-	gi|297736731|emb|CBI25831.3|/1.56534e-19/unnamed protein product [Vitis vinifera]
GSVIVT01027063001	-2.33698	0.833802	K08237|1|1e-151|534|vvi:100246482|hydroquinone glucosyltransferase [EC:2.4.1.218]	-	GO:0035251//UDP-glucosyltransferase activity	GO:0006970//response to osmotic stress;GO:0006805//xenobiotic metabolic process	gi|297745407|emb|CBI40487.3|/0/unnamed protein product [Vitis vinifera]
GSVIVT01013447001	1.38904	0.811289	-	GO:0009536//plastid	-	GO:0009890//negative regulation of biosynthetic process	gi|297745618|emb|CBI40783.3|/9.48121e-49/unnamed protein product [Vitis vinifera]
GSVIVT01010525001	2.08832	0.818923	K13424|1|3e-23|106|vvi:100243352|WRKY transcription factor 33	-	GO:0003677//DNA binding;GO:0001071//nucleic acid binding transcription factor activity	GO:0010467//gene expression	gi|225425364|ref|XP_002275576.1|/1.98907e-82/PREDICTED: probable WRKY transcription factor 57 [Vitis vinifera]
GSVIVT01000442001	-1.65385	0.836159	K10411|1|3e-07|56.2|cre:CHLREDRAFT_186669|dynein light chain 1, axonemal	-	-	-	gi|225447711|ref|XP_002272885.1|/0/PREDICTED: uncharacterized protein LOC100257895 [Vitis vinifera]
GSVIVT01021189001	1.91019	0.800454	-	-	-	-	gi|297740484|emb|CBI30666.3|/0/unnamed protein product [Vitis vinifera]
GSVIVT01030538001	2.74587	0.842582	-	GO:0009536//plastid	GO:0016891//endoribonuclease activity, producing 5'-phosphomonoesters	GO:0008033//tRNA processing	gi|225447197|ref|XP_002277241.1|/2.17171e-165/PREDICTED: ribonuclease Z, chloroplastic [Vitis vinifera]
GSVIVT01027027001	3.11957	0.838603	K01183|1|2e-105|380|sbi:SORBI_02g009370|chitinase [EC:3.2.1.14]	GO:0030312//external encapsulating structure	GO:0004553//hydrolase activity, hydrolyzing O-glycosyl compounds;GO:0043167//ion binding	GO:0006026	gi|225454408|ref|XP_002279661.1|/1.7118e-158/PREDICTED: acidic endochitinase [Vitis vinifera]
GSVIVT01019012001	2.97159	0.836311	K09338|1|5e-43|172|aly:ARALYDRAFT_490960|homeobox-leucine zipper protein	GO:0043231//intracellular membrane-bounded organelle	GO:0001071//nucleic acid binding transcription factor activity;GO:0003677//DNA binding	GO:0009725//response to hormone stimulus;GO:0006355//regulation of transcription, DNA-dependent	gi|225430830|ref|XP_002273007.1|/3.37648e-87/PREDICTED: homeobox-leucine zipper protein ATHB-40 [Vitis vinifera]
GSVIVT01000669001	2.82352	0.892755	-	-	-	-	gi|359487196|ref|XP_002269821.2|/0/PREDICTED: uncharacterized protein LOC100248068 [Vitis vinifera]
GSVIVT01013903001	5.79927	0.932785	K09286|1|7e-15|77.4|ath:AT4G17500|EREBP-like factor	GO:0043231//intracellular membrane-bounded organelle	GO:0003676//nucleic acid binding;GO:0001071//nucleic acid binding transcription factor activity	GO:0006351//transcription, DNA-dependent;GO:0000160//two-component signal transduction system (phosphorelay);GO:0006950//response to stress	gi|297744996|emb|CBI38588.3|/1.35644e-79/unnamed protein product [Vitis vinifera]
GSVIVT01029444001	-1.64649	0.823854	-	-	-	-	gi|225443488|ref|XP_002270513.1|/3.97372e-76/PREDICTED: uncharacterized protein LOC100256402 [Vitis vinifera]
GSVIVT01028843001	3.80562	0.919896	-	GO:0009534//chloroplast thylakoid	GO:0004672//protein kinase activity	-	gi|225464604|ref|XP_002274943.1|/1.57542e-101/PREDICTED: uncharacterized LOC100266405 [Vitis vinifera]
GSVIVT01036162001	3.67694	0.848811	-	-	-	GO:0010038//response to metal ion	gi|225436677|ref|XP_002262763.1|/0/PREDICTED: aluminum-activated malate transporter 2 [Vitis vinifera]
GSVIVT01038550001	1.73203	0.802184	K03544|1|0.0|1042|vvi:100264001|ATP-dependent Clp protease ATP-binding subunit ClpX	GO:0044429//mitochondrial part	GO:0005515//protein binding;GO:0017111//nucleoside-triphosphatase activity;GO:0032559	GO:0044267//cellular protein metabolic process	gi|302143904|emb|CBI23009.3|/0/unnamed protein product [Vitis vinifera]
GSVIVT01030407001	5.11199	0.894053	-	-	-	-	gi|147791971|emb|CAN77644.1|/4.7702e-51/hypothetical protein VITISV_042877 [Vitis vinifera]
GSVIVT01022158001	-3.21871	0.91263	K01858|1|0.0|1018|vvi:100259515|myo-inositol-1-phosphate synthase [EC:5.5.1.4]	GO:0044424//intracellular part	GO:0016872//intramolecular lyase activity	GO:0006644//phospholipid metabolic process;GO:0006020//inositol metabolic process	gi|225438660|ref|XP_002281657.1|/0/PREDICTED: inositol-3-phosphate synthase [Vitis vinifera]
GSVIVT01009099001	-1.75765	0.850389	K06892|1|4e-62|237|pop:POPTR_550478|;K05278|2|8e-52|202|gmx:778157|flavonol synthase [EC:1.14.11.23]	-	GO:0016706//oxidoreductase activity, acting on paired donors, with incorporation or reduction of molecular oxygen, 2-oxoglutarate as one donor, and incorporation of one atom each of oxygen into both donors	GO:0008152//metabolic process	gi|225459191|ref|XP_002285730.1|/0/PREDICTED: thebaine 6-O-demethylase [Vitis vinifera]
GSVIVT01026084001	1.57286	0.818837	K01061|1|1e-117|421|pop:POPTR_1108355|carboxymethylenebutenolidase [EC:3.1.1.45]	GO:0009532//plastid stroma	GO:0003824//catalytic activity	-	gi|359493330|ref|XP_002264796.2|/6.53348e-161/PREDICTED: carboxymethylenebutenolidase homolog [Vitis vinifera]
GSVIVT01020069001	2.4619	0.845848	K01176|1|8e-115|413|ppp:PHYPADRAFT_60178|alpha-amylase [EC:3.2.1.1]	GO:0009532//plastid stroma	GO:0016160//amylase activity;GO:0046872//metal ion binding	GO:0005982//starch metabolic process	gi|296086427|emb|CBI32016.3|/0/unnamed protein product [Vitis vinifera]
GSVIVT01021793001	-1.85302	0.861613	K10046|1|0.0|776|vvi:100233034|GDP-D-mannose 3', 5'-epimerase [EC:5.1.3.18 5.1.3.-]	-	GO:0048037//cofactor binding;GO:0016857//racemase and epimerase activity, acting on carbohydrates and derivatives	GO:0008152//metabolic process	gi|225451338|ref|XP_002279377.1|/0/PREDICTED: GDP-mannose 3,5-epimerase 1 [Vitis vinifera]
GSVIVT01009730001	1.84721	0.823767	-	-	-	-	gi|225458245|ref|XP_002282213.1|/7.76751e-83/PREDICTED: uncharacterized protein LOC100259078 [Vitis vinifera]
GSVIVT01014184001	1.97132	0.817971	-	-	-	-	gi|225461699|ref|XP_002285489.1|/1.5892e-101/PREDICTED: pathogen-related protein [Vitis vinifera]
GSVIVT01020809001	2.49978	0.826535	K15336|1|2e-35|149|vvi:100259391|tRNA (cytosine38-C5)-methyltransferase [EC:2.1.1.204]	GO:0009536//plastid	-	-	gi|225446761|ref|XP_002278350.1|/0/PREDICTED: pentatricopeptide repeat-containing protein At3g59040 [Vitis vinifera]
GSVIVT01023980001	-2.80528	0.887132	K02892|1|7e-48|186|vvi:4025136|large subunit ribosomal protein L23	GO:0030529//ribonucleoprotein complex;GO:0009536//plastid	GO:0003723//RNA binding;GO:0005198//structural molecule activity	GO:0010467//gene expression	gi|297744571|emb|CBI37833.3|/1.23964e-48/unnamed protein product [Vitis vinifera]
GSVIVT01012798001	1.9802	0.843404	K06685|1|9e-09|60.5|aly:ARALYDRAFT_492950|maintenance of ploidy protein MOB1 (MPS1 binder 1);K13420|2|9e-09|60.5|aly:ARALYDRAFT_356368|LRR receptor-like serine/threonine-protein kinase FLS2 [EC:2.7.11.1]	-	-	-	gi|296081026|emb|CBI18530.3|/0/unnamed protein product [Vitis vinifera]
GSVIVT01009064001	6.04389	0.973875	-	-	-	-	gi|302141980|emb|CBI19183.3|/4.98735e-114/unnamed protein product [Vitis vinifera]
GSVIVT01014216001	1.81466	0.833304	K04460|1|1e-15|84.3|bdi:100825585|protein phosphatase 5 [EC:3.1.3.16]	-	-	GO:0006970//response to osmotic stress;GO:0009738//abscisic acid mediated signaling pathway	gi|302142906|emb|CBI20201.3|/0/unnamed protein product [Vitis vinifera]
GSVIVT01016345001	4.12177	0.803049	K14411|1|5e-16|84.0|smo:SELMODRAFT_101375|RNA-binding protein Musashi	-	GO:0003676//nucleic acid binding	-	gi|359486705|ref|XP_002278641.2|/2.40383e-121/PREDICTED: uncharacterized protein LOC100265113 [Vitis vinifera]
GSVIVT01012867001	2.09765	0.860359	-	-	-	-	gi|225463055|ref|XP_002268417.1|/0/PREDICTED: uncharacterized protein LOC100267143 [Vitis vinifera]
GSVIVT01031737001	-1.82651	0.844183	K00366|1|0.0|928|gmx:732631|ferredoxin-nitrite reductase [EC:1.7.7.1]	GO:0009536//plastid	GO:0016664;GO:0051536//iron-sulfur cluster binding;GO:0005506//iron ion binding	GO:0051234//establishment of localization;GO:0042126//nitrate metabolic process;GO:0006091//generation of precursor metabolites and energy	gi|225428816|ref|XP_002285208.1|/0/PREDICTED: ferredoxin--nitrite reductase, chloroplastic [Vitis vinifera]
GSVIVT01034151001	-2.15246	0.858607	K07025|1|1e-127|455|gmx:100796466|putative hydrolase of the HAD superfamily	-	GO:0003824//catalytic activity	-	gi|297740356|emb|CBI30538.3|/0/unnamed protein product [Vitis vinifera]
GSVIVT01027456001	-2.70636	0.897448	K12134|1|9e-53|205|aly:ARALYDRAFT_904154|circadian clock associated 1;K12133|3|6e-47|184|ath:AT1G01060|LATE ELONGATED HYPOCOTYL	GO:0043231//intracellular membrane-bounded organelle	GO:0003676//nucleic acid binding	-	gi|147856747|emb|CAN81352.1|/1.68061e-131/hypothetical protein VITISV_012722 [Vitis vinifera]
GSVIVT01022346001	-1.84013	0.851146	K12843|1|7e-64|243|vvi:100248403|U4/U6 small nuclear ribonucleoprotein PRP3;K05681|2|3e-21|101|olu:OSTLU_38326|ATP-binding cassette, subfamily G (WHITE), member 2;K02065|4|1e-07|57.0|pop:POPTR_246085|putative ABC transport system ATP-binding protein	-	GO:0017111//nucleoside-triphosphatase activity;GO:0000166//nucleotide binding	-	gi|296082602|emb|CBI21607.3|/0/unnamed protein product [Vitis vinifera]
GSVIVT01007621001	-1.98944	0.84295	K03517|1|0.0|1232|vvi:100243361|quinolinate synthase [EC:2.5.1.72]	GO:0009536//plastid	GO:0051536//iron-sulfur cluster binding;GO:0042802//identical protein binding;GO:0030234//enzyme regulator activity;GO:0003824//catalytic activity	GO:0045333//cellular respiration;GO:0031325//positive regulation of cellular metabolic process;GO:0019359//nicotinamide nucleotide biosynthetic process;GO:0031163;GO:0043085//positive regulation of catalytic activity	gi|359491073|ref|XP_002276849.2|/0/PREDICTED: uncharacterized protein LOC100243361 [Vitis vinifera]
GSVIVT01022428001	1.60364	0.804196	-	GO:0031224//intrinsic to membrane	-	GO:0051234//establishment of localization	gi|296082663|emb|CBI21668.3|/0/unnamed protein product [Vitis vinifera]
GSVIVT01033277001	-1.37474	0.81901	K03403|1|0.0|1056|vvi:100258964|magnesium chelatase subunit H [EC:6.6.1.1]	-	GO:0051003	GO:0006779//porphyrin-containing compound biosynthetic process	gi|297739658|emb|CBI29840.3|/0/unnamed protein product [Vitis vinifera]
GSVIVT01023585001	-2.06091	0.841782	K12126|1|3e-09|62.0|aly:ARALYDRAFT_471048|phytochrome-interacting factor 3	-	-	-	gi|225445889|ref|XP_002276403.1|/1.79895e-166/PREDICTED: uncharacterized protein LOC100243222 [Vitis vinifera]
GSVIVT01023137001	1.79819	0.819507	-	-	GO:0003676//nucleic acid binding	-	gi|297739448|emb|CBI29630.3|/9.07568e-80/unnamed protein product [Vitis vinifera]
GSVIVT01035033001	3.74819	0.909537	K05349|1|0.0|1116|vvi:100252178|beta-glucosidase [EC:3.2.1.21]	-	GO:0015926//glucosidase activity	GO:0044238//primary metabolic process	gi|296083274|emb|CBI22910.3|/0/unnamed protein product [Vitis vinifera]
GSVIVT01035568001	-1.36465	0.811484	K07232|1|4e-49|193|osa:4335982|cation transport protein ChaC	-	-	-	gi|296081797|emb|CBI20802.3|/4.16862e-154/unnamed protein product [Vitis vinifera]
GSVIVT01001413001	2.45334	0.837327	K14548|1|6e-171|599|rcu:RCOM_0962120|U3 small nucleolar RNA-associated protein 4	-	GO:0048037//cofactor binding;GO:0016846//carbon-sulfur lyase activity	-	gi|225470828|ref|XP_002265873.1|/0/PREDICTED: tryptophan aminotransferase-related protein 4-like [Vitis vinifera]
GSVIVT01035926001	1.75163	0.809278	K07192|1|0.0|716|pop:POPTR_802471|flotillin	GO:0044459//plasma membrane part	-	GO:0048513//organ development;GO:0051817	gi|296082101|emb|CBI21106.3|/0/unnamed protein product [Vitis vinifera]
GSVIVT01011476001	1.94797	0.814598	-	GO:0031225//anchored to membrane;GO:0043231//intracellular membrane-bounded organelle	GO:0046914//transition metal ion binding	-	gi|225452918|ref|XP_002284104.1|/4.18942e-77/PREDICTED: lamin-like protein [Vitis vinifera]
GSVIVT01034516001	-1.60022	0.838949	K03841|1|0.0|686|vvi:100264087|fructose-1,6-bisphosphatase I [EC:3.1.3.11]	GO:0044424//intracellular part	GO:0016628//oxidoreductase activity, acting on the CH-CH group of donors, NAD or NADP as acceptor;GO:0019203//carbohydrate phosphatase activity;GO:0043169//cation binding	GO:0005975//carbohydrate metabolic process	gi|225460680|ref|XP_002269230.1|/0/PREDICTED: fructose-1,6-bisphosphatase, cytosolic [Vitis vinifera]
GSVIVT01023629001	1.98007	0.843555	-	GO:0031224//intrinsic to membrane	-	GO:0006952//defense response;GO:0006972//hyperosmotic response	gi|225445834|ref|XP_002277561.1|/4.37274e-38/PREDICTED: UPF0057 membrane protein At4g30650 [Vitis vinifera]
GSVIVT01036499001	-1.63952	0.844312	K12135|1|6e-85|313|aly:ARALYDRAFT_488429|zinc finger protein CONSTANS	-	-	-	gi|298204419|emb|CBI16899.3|/0/unnamed protein product [Vitis vinifera]
GSVIVT01017204001	3.04611	0.892907	K05681|1|5e-54|213|cme:CMS467C|ATP-binding cassette, subfamily G (WHITE), member 2	-	-	-	gi|297743362|emb|CBI36229.3|/0/unnamed protein product [Vitis vinifera]
GSVIVT01035743001	2.24522	0.872599	K10144|1|0.0|673|vvi:100252623|RING finger and CHY zinc finger domain-containing protein 1 [EC:6.3.2.19]	-	GO:0046914//transition metal ion binding	-	gi|225430120|ref|XP_002284652.1|/0/PREDICTED: RING finger and CHY zinc finger domain-containing protein 1 [Vitis vinifera]
GSVIVT01029119001	-1.9884	0.841739	-	GO:0009532//plastid stroma	GO:0016462//pyrophosphatase activity;GO:0032559	-	gi|297735331|emb|CBI17771.3|/2.34196e-71/unnamed protein product [Vitis vinifera]
GSVIVT01035467001	5.3673	0.836397	K09422|1|5e-114|407|vvi:100250947|myb proto-oncogene protein, plant	GO:0043231//intracellular membrane-bounded organelle	GO:0003676//nucleic acid binding	-	gi|225429672|ref|XP_002279941.1|/5.38447e-113/PREDICTED: transcription factor WER [Vitis vinifera]
GSVIVT01032905001	1.81065	0.81237	K13289|1|4e-155|546|ath:AT2G24010|cathepsin A (carboxypeptidase C) [EC:3.4.16.5];K08249|2|5e-148|523|pop:POPTR_1084309|hydroxymandelonitrile lyase [EC:4.1.2.11]	GO:0044464//cell part	GO:0004180//carboxypeptidase activity	GO:0019538//protein metabolic process	gi|225451745|ref|XP_002280058.1|/0/PREDICTED: serine carboxypeptidase-like 25 [Vitis vinifera]
GSVIVT01019513001	3.57523	0.878763	-	GO:0030312//external encapsulating structure	GO:0004175//endopeptidase activity;GO:0005515//protein binding	GO:0008152//metabolic process;GO:0044092//negative regulation of molecular function	gi|225425996|ref|XP_002272604.1|/1.56807e-46/PREDICTED: uncharacterized protein LOC100258722 [Vitis vinifera]
GSVIVT01034903001	1.76329	0.833737	K01590|1|0.0|883|vvi:100258141|histidine decarboxylase [EC:4.1.1.22]	-	GO:0016831//carboxy-lyase activity;GO:0048037//cofactor binding	GO:0003006//developmental process involved in reproduction;GO:0019752//carboxylic acid metabolic process	gi|225463912|ref|XP_002266398.1|/0/PREDICTED: histidine decarboxylase-like [Vitis vinifera]
GSVIVT01018039001	-1.87727	0.856099	K08967|1|9e-91|331|rcu:RCOM_0911100|1,2-dihydroxy-3-keto-5-methylthiopentene dioxygenase [EC:1.13.11.53 1.13.11.54]	-	GO:0043169//cation binding;GO:0016702//oxidoreductase activity, acting on single donors with incorporation of molecular oxygen, incorporation of two atoms of oxygen	GO:0043102	gi|363805407|sp|D7T737.1|MTND1_VITVI/2.11013e-112/RecName: Full=1,2-dihydroxy-3-keto-5-methylthiopentene dioxygenase 1; AltName: Full=Acireductone dioxygenase (Fe(2+)-requiring) 1; Short=ARD 1; Short=Fe-ARD 1
GSVIVT01009721001	3.61606	0.837933	-	-	-	GO:0003006//developmental process involved in reproduction	gi|302142503|emb|CBI19706.3|/2.58541e-129/unnamed protein product [Vitis vinifera]
GSVIVT01014388001	3.59688	0.923119	K00218|1|0.0|714|vvi:100255647|protochlorophyllide reductase [EC:1.3.1.33]	GO:0009536//plastid	GO:0016628//oxidoreductase activity, acting on the CH-CH group of donors, NAD or NADP as acceptor	GO:0006779//porphyrin-containing compound biosynthetic process	gi|359493870|ref|XP_002284769.2|/0/PREDICTED: protochlorophyllide reductase, chloroplastic-like [Vitis vinifera]
GSVIVT01023990001	-1.72935	0.812976	K02293|1|6e-14|77.8|ota:Ot10g02960|15-cis-phytoene desaturase [EC:1.3.5.5];K00514|4|5e-12|71.2|vcn:VOLCADRAFT_95071|zeta-carotene desaturase [EC:1.3.5.6]	-	GO:0016491//oxidoreductase activity	GO:0008152//metabolic process	gi|297744581|emb|CBI37843.3|/0/unnamed protein product [Vitis vinifera]
GSVIVT01015479001	3.8806	0.841133	K06694|1|3e-14|79.3|sbi:SORBI_01g007540|26S proteasome non-ATPase regulatory subunit 10;K05391|3|5e-14|78.6|gmx:100820202|cyclic nucleotide gated channel, other eukaryote	GO:0031224//intrinsic to membrane	GO:0005267//potassium channel activity	GO:0030001//metal ion transport	gi|297738905|emb|CBI28150.3|/0/unnamed protein product [Vitis vinifera]
GSVIVT01014490001	-1.98208	0.824178	K00924|1|4e-16|85.1|osa:4333912|[EC:2.7.1.-];K04733|3|7e-15|80.9|smo:SELMODRAFT_159261|interleukin-1 receptor-associated kinase 4 [EC:2.7.11.1];K13430|5|7e-15|80.9|zma:100283091|serine/threonine-protein kinase PBS1 [EC:2.7.11.1]	-	-	-	gi|302143123|emb|CBI20418.3|/0/unnamed protein product [Vitis vinifera]
GSVIVT01012850001	-1.53987	0.800865	K08193|1|4e-46|184|cme:CMP354C|MFS transporter, ACS family, solute carrier family 17 (sodium-dependent inorganic phosphate cotransporter), other;K12303|4|3e-28|124|cre:CHLREDRAFT_78631|MFS transporter, ACS family, solute carrier family 17 (sodium-dependent inorganic phosphate cotransporter), member 9	-	-	GO:0006810//transport	gi|296084539|emb|CBI25560.3|/1.55815e-168/unnamed protein product [Vitis vinifera]
GSVIVT01032389001	-1.74863	0.816328	K14510|1|1e-34|146|ppp:PHYPADRAFT_30352|serine/threonine-protein kinase CTR1 [EC:2.7.11.1];K04424|2|7e-33|140|ath:AT5G11850|sterile alpha motif and leucine zipper containing kinase AZK [EC:2.7.11.25]	-	GO:0004702//receptor signaling protein serine/threonine kinase activity;GO:0032559	GO:0006464//cellular protein modification process	gi|225452312|ref|XP_002272486.1|/0/PREDICTED: serine/threonine-protein kinase HT1 [Vitis vinifera]
GSVIVT01033674001	2.56964	0.868209	K10144|1|5e-149|525|rcu:RCOM_1353430|RING finger and CHY zinc finger domain-containing protein 1 [EC:6.3.2.19]	-	GO:0046914//transition metal ion binding	-	gi|225441157|ref|XP_002268193.1|/0/PREDICTED: RING finger and CHY zinc finger domain-containing protein 1 isoform 2 [Vitis vinifera]
GSVIVT01036018001	-2.8735	0.849265	K00924|1|3e-20|98.2|ath:AT5G22850|[EC:2.7.1.-]	-	GO:0004175//endopeptidase activity	GO:0019538//protein metabolic process	gi|359476195|ref|XP_002268758.2|/0/PREDICTED: aspartic proteinase nepenthesin-2-like [Vitis vinifera]
GSVIVT01013663001	-3.75481	0.800087	K13993|1|1e-75|280|vvi:100256188|HSP20 family protein	-	-	-	gi|297739342|emb|CBI29332.3|/1.39779e-74/unnamed protein product [Vitis vinifera]
GSVIVT01009474001	2.73164	0.820567	-	-	GO:0004175//endopeptidase activity	GO:0019538//protein metabolic process	gi|302142299|emb|CBI19502.3|/7.64706e-103/unnamed protein product [Vitis vinifera]
GSVIVT01025088001	2.37012	0.861267	K12129|1|0.0|947|vvi:100246836|pseudo-response regulator 7	-	-	GO:0044237//cellular metabolic process;GO:0050794//regulation of cellular process	gi|297746178|emb|CBI16234.3|/0/unnamed protein product [Vitis vinifera]
GSVIVT01024637001	-1.86029	0.830709	-	GO:0030312//external encapsulating structure;GO:0042579//microbody	GO:0030234//enzyme regulator activity;GO:0004091//carboxylesterase activity	GO:0071555//cell wall organization	gi|225434449|ref|XP_002277781.1|/0/PREDICTED: uncharacterized protein At1g18480 [Vitis vinifera]
GSVIVT01024789001	2.55542	0.861181	K03147|1|0.0|1289|vvi:100250096|thiamine biosynthesis protein ThiC	GO:0009532//plastid stroma	GO:0019144//ADP-sugar diphosphatase activity;GO:0051540	GO:0006772//thiamine metabolic process;GO:0033273//response to vitamin;GO:0009581//detection of external stimulus	gi|225434668|ref|XP_002280227.1|/0/PREDICTED: phosphomethylpyrimidine synthase [Vitis vinifera]
GSVIVT01031844001	2.68628	0.892344	-	GO:0009536//plastid	-	GO:0006952//defense response;GO:0003006//developmental process involved in reproduction	gi|225428657|ref|XP_002284884.1|/3.04176e-110/PREDICTED: uncharacterized protein LOC100267586 [Vitis vinifera]
GSVIVT01025792001	2.30846	0.862997	-	GO:0009523//photosystem II;GO:0009532//plastid stroma;GO:0009534//chloroplast thylakoid	GO:0046872//metal ion binding	GO:0044237//cellular metabolic process	gi|225440155|ref|XP_002283307.1|/5.40481e-141/PREDICTED: psbP domain-containing protein 6, chloroplastic [Vitis vinifera]
GSVIVT01008654001	2.03073	0.860813	K01880|1|0.0|1284|vvi:100257704|glycyl-tRNA synthetase [EC:6.1.1.14]	GO:0043231//intracellular membrane-bounded organelle	GO:0004812//aminoacyl-tRNA ligase activity;GO:0032559	GO:0006418//tRNA aminoacylation for protein translation;GO:0010038//response to metal ion	gi|225456501|ref|XP_002280957.1|/0/PREDICTED: glycyl-tRNA synthetase 1, mitochondrial-like [Vitis vinifera]
GSVIVT01000154001	-1.59799	0.838625	-	GO:0043231//intracellular membrane-bounded organelle	-	-	gi|225438936|ref|XP_002284127.1|/2.38432e-158/PREDICTED: uncharacterized protein ycf36 [Vitis vinifera]
GSVIVT01018654001	-1.80184	0.844745	K13993|1|2e-35|148|vvi:100248906|HSP20 family protein	-	-	GO:0006950//response to stress;GO:0010038//response to metal ion	gi|225466111|ref|XP_002267332.1|/1.53009e-65/PREDICTED: 23.6 kDa heat shock protein, mitochondrial isoform 1 [Vitis vinifera]
GSVIVT01022194001	2.85731	0.821907	-	-	-	-	gi|296082472|emb|CBI21477.3|/3.10268e-61/unnamed protein product [Vitis vinifera]
GSVIVT01009795001	-1.39792	0.812024	-	GO:0009536//plastid	GO:0042623//ATPase activity, coupled	GO:0019538//protein metabolic process	gi|302142568|emb|CBI19771.3|/4.85529e-114/unnamed protein product [Vitis vinifera]
GSVIVT01011034001	4.32562	0.898702	K11251|1|9e-61|231|vvi:100254490|histone H2A	GO:0000785//chromatin;GO:0043231//intracellular membrane-bounded organelle	GO:0003676//nucleic acid binding	GO:0034728//nucleosome organization	gi|225436843|ref|XP_002271506.1|/1.04928e-59/PREDICTED: histone H2AX [Vitis vinifera]
GSVIVT01032545001	2.78437	0.875454	K07761|1|7e-53|207|ath:AT1G59970|gelatinase A [EC:3.4.24.24]	GO:0044421//extracellular region part	GO:0046914//transition metal ion binding;GO:0004175//endopeptidase activity	GO:0019538//protein metabolic process	gi|225452580|ref|XP_002280833.1|/5.0692e-159/PREDICTED: metalloendoproteinase 1 [Vitis vinifera]
GSVIVT01009663001	-1.90037	0.861462	-	-	GO:0005515//protein binding	-	gi|225458352|ref|XP_002281702.1|/0/PREDICTED: uncharacterized protein LOC100264365 [Vitis vinifera]
GSVIVT01018833001	2.20931	0.812284	-	-	-	-	gi|297735055|emb|CBI17417.3|/2.49236e-144/unnamed protein product [Vitis vinifera]
GSVIVT01028717001	-2.66695	0.892798	K03093|1|0.0|914|vvi:100250120|RNA polymerase sigma factor	-	GO:0034062//RNA polymerase activity;GO:0003676//nucleic acid binding;GO:0001071//nucleic acid binding transcription factor activity;GO:0000996	GO:0006351//transcription, DNA-dependent;GO:0009639//response to red or far red light	gi|225462725|ref|XP_002268709.1|/0/PREDICTED: RNA polymerase sigma factor rpoD [Vitis vinifera]
GSVIVT01030779001	-1.30336	0.801946	-	-	-	-	gi|296087133|emb|CBI33507.3|/0/unnamed protein product [Vitis vinifera]
GSVIVT01031890001	1.52242	0.825108	-	-	-	-	gi|225428596|ref|XP_002284722.1|/9.79537e-85/PREDICTED: uncharacterized protein LOC100248690 [Vitis vinifera]
GSVIVT01026982001	3.95573	0.915657	K04733|1|9e-82|303|smo:SELMODRAFT_33807|interleukin-1 receptor-associated kinase 4 [EC:2.7.11.1];K13418|4|1e-68|259|aly:ARALYDRAFT_895025|somatic embryogenesis receptor kinase 1 [EC:2.7.10.1 2.7.11.1];K13430|5|1e-68|259|rcu:RCOM_1078760|serine/threonine-protein kinase PBS1 [EC:2.7.11.1]	GO:0016020//membrane	GO:0004702//receptor signaling protein serine/threonine kinase activity;GO:0032559	GO:0006464//cellular protein modification process	gi|359489654|ref|XP_003633957.1|/0/PREDICTED: probable serine/threonine-protein kinase At1g01540-like [Vitis vinifera]
GSVIVT01030675001	2.70939	0.88471	-	GO:0044464//cell part	GO:0004175//endopeptidase activity	GO:0019538//protein metabolic process	gi|296087086|emb|CBI33460.3|/2.56114e-86/unnamed protein product [Vitis vinifera]
GSVIVT01030033001	-1.5348	0.813819	K01868|1|0.0|1266|vvi:100256277|threonyl-tRNA synthetase [EC:6.1.1.3]	GO:0009532//plastid stroma	GO:0004812//aminoacyl-tRNA ligase activity;GO:0032559	GO:0006418//tRNA aminoacylation for protein translation;GO:0003006//developmental process involved in reproduction	gi|296084987|emb|CBI28402.3|/0/unnamed protein product [Vitis vinifera]
GSVIVT01007817001	6.03774	0.951687	-	-	-	-	gi|297733836|emb|CBI15083.3|/1.44179e-53/unnamed protein product [Vitis vinifera]
GSVIVT01025697001	1.98868	0.867258	K11294|1|5e-32|137|smo:SELMODRAFT_15428|nucleolin;K12741|4|2e-16|85.9|sbi:SORBI_04g007860|heterogeneous nuclear ribonucleoprotein A1/A3	GO:0009532//plastid stroma;GO:0009526//plastid envelope;GO:0009534//chloroplast thylakoid	GO:0008187//poly-pyrimidine tract binding	GO:0006952//defense response;GO:0009725//response to hormone stimulus	gi|225440003|ref|XP_002281642.1|/1.26907e-100/PREDICTED: 31 kDa ribonucleoprotein, chloroplastic isoform 1 [Vitis vinifera]
GSVIVT01005030001	-3.37518	0.830882	K06892|1|7e-70|262|pop:POPTR_550478|;K05277|3|2e-49|194|gmx:547615|leucoanthocyanidin dioxygenase [EC:1.14.11.19];K05278|4|2e-49|194|gmx:100816829|flavonol synthase [EC:1.14.11.23]	-	GO:0046914//transition metal ion binding;GO:0016706//oxidoreductase activity, acting on paired donors, with incorporation or reduction of molecular oxygen, 2-oxoglutarate as one donor, and incorporation of one atom each of oxygen into both donors;GO:0016701//oxidoreductase activity, acting on single donors with incorporation of molecular oxygen	GO:0051553	gi|225448882|ref|XP_002270667.1|/0/PREDICTED: probable 2-oxoglutarate/Fe(II)-dependent dioxygenase [Vitis vinifera]
GSVIVT01018304001	1.72472	0.825908	-	-	GO:0016772//transferase activity, transferring phosphorus-containing groups;GO:0005488//binding	GO:0007049//cell cycle;GO:0006796//phosphate-containing compound metabolic process	gi|225453342|ref|XP_002271136.1|/1.85829e-100/PREDICTED: cyclin-U4-1 [Vitis vinifera]
GSVIVT01031973001	1.74909	0.855601	K13195|1|4e-36|149|pop:POPTR_712972|cold-inducible RNA-binding protein;K02965|2|9e-16|82.0|ath:AT5G47320|small subunit ribosomal protein S19;K11294|3|7e-14|75.9|smo:SELMODRAFT_15428|nucleolin	-	GO:0005488//binding	-	gi|297741463|emb|CBI32594.3|/1.11053e-41/unnamed protein product [Vitis vinifera]
GSVIVT01008995001	1.91128	0.819853	-	-	GO:0016798//hydrolase activity, acting on glycosyl bonds;GO:0043167//ion binding;GO:0005515//protein binding	GO:0044238//primary metabolic process	gi|225459360|ref|XP_002285806.1|/0/PREDICTED: probable glucan 1,3-beta-glucosidase A [Vitis vinifera]
GSVIVT01008332001	-1.80491	0.806704	-	-	-	-	gi|297734243|emb|CBI15490.3|/0/unnamed protein product [Vitis vinifera]
GSVIVT01012209001	-3.19254	0.870826	K15283|1|0.0|768|vvi:100259322|solute carrier family 35, member E1	GO:0031224//intrinsic to membrane	-	GO:0051234//establishment of localization	gi|225423489|ref|XP_002267940.1|/0/PREDICTED: triose phosphate/phosphate translocator, chloroplastic [Vitis vinifera]
GSVIVT01020725001	1.71452	0.852703	K01058|1|7e-34|143|pop:POPTR_918082|phospholipase A1 [EC:3.1.1.32]	GO:0009536//plastid	GO:0004091//carboxylesterase activity	GO:0044238//primary metabolic process	gi|302143435|emb|CBI21996.3|/0/unnamed protein product [Vitis vinifera]
GSVIVT01033033001	-1.81824	0.832504	-	-	GO:0008081//phosphoric diester hydrolase activity	GO:0019400	gi|296082305|emb|CBI21310.3|/0/unnamed protein product [Vitis vinifera]
GSVIVT01030174001	2.84685	0.826427	K13425|1|5e-12|70.5|vvi:100256849|WRKY transcription factor 22;K13424|4|2e-10|65.1|pop:POPTR_577093|WRKY transcription factor 33	-	-	-	gi|297735534|emb|CBI18028.3|/0/unnamed protein product [Vitis vinifera]
GSVIVT01016697001	-1.6203	0.800843	K13993|1|1e-25|115|rcu:RCOM_0706490|HSP20 family protein	-	-	GO:0000302//response to reactive oxygen species;GO:0009642//response to light intensity	gi|147782666|emb|CAN61792.1|/1.06744e-107/hypothetical protein VITISV_015797 [Vitis vinifera]
GSVIVT01014332001	-1.5358	0.822405	K10143|1|7e-53|204|vvi:100258898|E3 ubiquitin-protein ligase RFWD2 [EC:6.3.2.19]	GO:0031234//extrinsic to internal side of plasma membrane;GO:0031461//cullin-RING ubiquitin ligase complex	GO:0016301//kinase activity;GO:0005515//protein binding;GO:0016628//oxidoreductase activity, acting on the CH-CH group of donors, NAD or NADP as acceptor;GO:0032559	GO:0006464//cellular protein modification process	gi|359493656|ref|XP_002282441.2|/8.84244e-52/PREDICTED: protein SPA1-RELATED 3-like [Vitis vinifera]
GSVIVT01028987001	-3.01463	0.867885	K01177|1|0.0|929|vvi:100242636|beta-amylase [EC:3.2.1.2]	GO:0043231//intracellular membrane-bounded organelle;GO:0044444//cytoplasmic part;GO:0016020//membrane	GO:0016772//transferase activity, transferring phosphorus-containing groups;GO:0016160//amylase activity;GO:0005102//receptor binding;GO:0043167//ion binding;GO:0032559	GO:0005982//starch metabolic process;GO:0009933//meristem structural organization;GO:0007167//enzyme linked receptor protein signaling pathway;GO:0010073//meristem maintenance;GO:0003006//developmental process involved in reproduction;GO:0006950//response to stress;GO:0006464//cellular protein modification process	gi|359477810|ref|XP_003632025.1|/0/PREDICTED: LOW QUALITY PROTEIN: beta-amylase 1, chloroplastic-like, partial [Vitis vinifera]
GSVIVT01029594001	1.76768	0.84481	-	-	-	-	gi|225443333|ref|XP_002263564.1|/2.55811e-80/PREDICTED: uncharacterized protein LOC100246222 [Vitis vinifera]
GSVIVT01019908001	2.99229	0.843685	-	-	-	-	gi|297742640|emb|CBI34789.3|/4.86127e-77/unnamed protein product [Vitis vinifera]
GSVIVT01022171001	-2.1325	0.864425	K02114|1|4e-13|74.3|vvi:4025007|F-type H+-transporting ATPase subunit epsilon [EC:3.6.3.14]	GO:0009534//chloroplast thylakoid;GO:0033178//proton-transporting two-sector ATPase complex, catalytic domain	GO:0015078//hydrogen ion transmembrane transporter activity;GO:0019829//cation-transporting ATPase activity;GO:0032559	GO:0015986//ATP synthesis coupled proton transport	gi|296082454|emb|CBI21459.3|/4.34851e-41/unnamed protein product [Vitis vinifera]
GSVIVT01016701001	1.9147	0.856553	-	-	-	-	gi|359482333|ref|XP_003632757.1|/3.8058e-67/PREDICTED: auxin-repressed 12.5 kDa protein-like [Vitis vinifera]
GSVIVT01004944001	3.58436	0.922275	-	-	-	-	gi|225425246|ref|XP_002269300.1|/9.71446e-77/PREDICTED: light-regulated protein [Vitis vinifera]
GSVIVT01027788001	2.93527	0.851081	-	-	-	-	gi|296083635|emb|CBI23624.3|/4.61936e-35/unnamed protein product [Vitis vinifera]
GSVIVT01030418001	1.53438	0.809191	-	GO:0031225//anchored to membrane	-	-	gi|225446995|ref|XP_002266937.1|/4.08843e-101/PREDICTED: fasciclin-like arabinogalactan protein 7 isoform 2 [Vitis vinifera]
GSVIVT01015824001	1.69128	0.836721	K00818|1|3e-41|168|vcn:VOLCADRAFT_127260|acetylornithine aminotransferase [EC:2.6.1.11];K00819|3|4e-39|161|cme:CML323C|ornithine--oxo-acid transaminase [EC:2.6.1.13]	-	GO:0048037//cofactor binding;GO:0008483//transaminase activity	-	gi|296087517|emb|CBI34106.3|/0/unnamed protein product [Vitis vinifera]
GSVIVT01032528001	2.94668	0.824459	-	GO:0044464//cell part	GO:0005488//binding	-	gi|296087713|emb|CBI34969.3|/1.75849e-39/unnamed protein product [Vitis vinifera]
GSVIVT01030441001	3.55286	0.828244	K00423|1|2e-174|610|aly:ARALYDRAFT_892557|L-ascorbate oxidase [EC:1.10.3.3]	-	GO:0016682//oxidoreductase activity, acting on diphenols and related substances as donors, oxygen as acceptor;GO:0046914//transition metal ion binding	GO:0008152//metabolic process	gi|225447041|ref|XP_002269614.1|/0/PREDICTED: L-ascorbate oxidase homolog [Vitis vinifera]
GSVIVT01007727001	-1.92412	0.845588	K06195|1|1e-51|202|ppp:PHYPADRAFT_142413|ApaG protein;K10290|3|2e-11|69.3|vcn:VOLCADRAFT_94568|F-box protein 3	GO:0043231//intracellular membrane-bounded organelle	GO:0016788//hydrolase activity, acting on ester bonds;GO:0003676//nucleic acid binding	GO:0006281//DNA repair	gi|297733766|emb|CBI15013.3|/0/unnamed protein product [Vitis vinifera]
GSVIVT01016304001	-3.11613	0.828568	K08472|1|2e-170|597|aly:ARALYDRAFT_315221|mlo protein	GO:0031224//intrinsic to membrane	-	GO:0050832//defense response to fungus;GO:0009987//cellular process	gi|359486684|ref|XP_002274642.2|/0/PREDICTED: MLO7 protein [Vitis vinifera]
GSVIVT01029167001	2.23468	0.873724	K14504|1|2e-121|380|rcu:RCOM_1630040|xyloglucan:xyloglucosyl transferase TCH4 [EC:2.4.1.207];K08235|3|5e-121|375|vvi:100252949|xyloglucan:xyloglucosyl transferase [EC:2.4.1.207]	GO:0005576//extracellular region;GO:0030312//external encapsulating structure	GO:0016798//hydrolase activity, acting on glycosyl bonds;GO:0016758//transferase activity, transferring hexosyl groups	GO:0044042//glucan metabolic process	gi|225446109|ref|XP_002274404.1|/3.55016e-147/PREDICTED: probable xyloglucan endotransglucosylase/hydrolase protein 23 [Vitis vinifera]
GSVIVT01020565001	1.77493	0.832937	K15406|1|4e-38|157|aly:ARALYDRAFT_330267|wax-ester synthase / diacylglycerol O-acyltransferase [EC:2.3.1.75 2.3.1.20]	-	GO:0016411//acylglycerol O-acyltransferase activity	-	gi|302143306|emb|CBI21867.3|/0/unnamed protein product [Vitis vinifera]
GSVIVT01019909001	1.34333	0.809213	K00517|1|7e-61|233|osa:4348172|[EC:1.14.-.-];K09755|5|2e-45|181|mtr:MTR_5g021390|ferulate-5-hydroxylase [EC:1.14.-.-]	-	-	-	gi|297742641|emb|CBI34790.3|/0/unnamed protein product [Vitis vinifera]
GSVIVT01037765001	1.55858	0.814208	-	GO:0009526//plastid envelope;GO:0016020//membrane	GO:0008565//protein transporter activity	-	gi|225460789|ref|XP_002274964.1|/7.39496e-95/PREDICTED: uncharacterized protein LOC100248615 [Vitis vinifera]
GSVIVT01037343001	-2.2624	0.86596	K01640|1|0.0|819|vvi:100264975|hydroxymethylglutaryl-CoA lyase [EC:4.1.3.4]	GO:0043231//intracellular membrane-bounded organelle	GO:0016833//oxo-acid-lyase activity	GO:0009081//branched-chain amino acid metabolic process	gi|225435868|ref|XP_002263865.1|/0/PREDICTED: hydroxymethylglutaryl-CoA lyase, mitochondrial [Vitis vinifera]
GSVIVT01026405001	-1.72211	0.845502	K09839|1|0.0|923|vvi:100257865|violaxanthin de-epoxidase [EC:1.10.99.3]	GO:0009534//chloroplast thylakoid;GO:0009523//photosystem II	GO:0005488//binding;GO:0016491//oxidoreductase activity	GO:0006778//porphyrin-containing compound metabolic process;GO:0032787//monocarboxylic acid metabolic process;GO:0016116//carotenoid metabolic process;GO:0006950//response to stress	gi|225462409|ref|XP_002267152.1|/0/PREDICTED: violaxanthin de-epoxidase, chloroplastic [Vitis vinifera]
GSVIVT01025566001	2.10761	0.818101	K00799|1|4e-138|489|vvi:100246597|glutathione S-transferase [EC:2.5.1.18]	GO:0044424//intracellular part	GO:0016765//transferase activity, transferring alkyl or aryl (other than methyl) groups	-	gi|225439785|ref|XP_002276301.1|/4.63037e-137/PREDICTED: glutathione S-transferase L3 [Vitis vinifera]
GSVIVT01004634001	-3.57811	0.916804	K05907|1|3e-75|279|ath:AT4G04610|adenylyl-sulfate reductase (glutathione) [EC:1.8.4.9]	-	GO:0016671//oxidoreductase activity, acting on a sulfur group of donors, disulfide as acceptor	GO:0006790//sulfur compound metabolic process;GO:0019725//cellular homeostasis	gi|296084773|emb|CBI14796.3|/6.20358e-118/unnamed protein product [Vitis vinifera]
GSVIVT01011899001	3.21687	0.855861	K00547|1|0.0|631|vvi:100247323|homocysteine S-methyltransferase [EC:2.1.1.10]	-	GO:0008172	GO:0006730//one-carbon metabolic process;GO:0000097//sulfur amino acid biosynthetic process	gi|225423971|ref|XP_002282549.1|/9.45619e-180/PREDICTED: homocysteine S-methyltransferase 1 [Vitis vinifera]
GSVIVT01018086001	2.03689	0.856791	K15397|1|4e-148|488|vvi:100263066|3-ketoacyl-CoA synthase [EC:2.3.1.-]	-	GO:0016747//transferase activity, transferring acyl groups other than amino-acyl groups	GO:0006629//lipid metabolic process	gi|297737142|emb|CBI26343.3|/0/unnamed protein product [Vitis vinifera]
GSVIVT01029171001	3.64132	0.82327	K08235|1|9e-130|461|vvi:100241119|xyloglucan:xyloglucosyl transferase [EC:2.4.1.207];K14504|3|3e-118|422|vvi:100256520|xyloglucan:xyloglucosyl transferase TCH4 [EC:2.4.1.207]	GO:0005576//extracellular region;GO:0030312//external encapsulating structure	GO:0016798//hydrolase activity, acting on glycosyl bonds;GO:0016758//transferase activity, transferring hexosyl groups	GO:0044042//glucan metabolic process	gi|225446103|ref|XP_002270299.1|/1.17719e-128/PREDICTED: probable xyloglucan endotransglucosylase/hydrolase protein 23 [Vitis vinifera]
GSVIVT01000333001	-1.69958	0.802747	K01495|1|7e-51|199|vvi:100244016|GTP cyclohydrolase I [EC:3.5.4.16]	-	GO:0003933//GTP cyclohydrolase activity	-	gi|147845441|emb|CAN79046.1|/1.61978e-95/hypothetical protein VITISV_035826 [Vitis vinifera]
GSVIVT01028261001	1.52564	0.820956	-	-	-	-	gi|297744096|emb|CBI37066.3|/9.61263e-36/unnamed protein product [Vitis vinifera]
GSVIVT01027777001	2.19665	0.870631	-	-	-	-	gi|147788764|emb|CAN69579.1|/1.24163e-46/hypothetical protein VITISV_044179 [Vitis vinifera]
GSVIVT01038580001	1.48831	0.808499	K09490|1|0.0|1145|vvi:100253826|heat shock 70kDa protein 5	GO:0044432//endoplasmic reticulum part	GO:0016628//oxidoreductase activity, acting on the CH-CH group of donors, NAD or NADP as acceptor;GO:0032559	GO:0050896//response to stimulus;GO:0008152//metabolic process	gi|302143929|emb|CBI23034.3|/0/unnamed protein product [Vitis vinifera]
GSVIVT01025121001	3.3735	0.851016	K10696|1|3e-07|55.8|osa:4349420|E3 ubiquitin-protein ligase BRE1 [EC:6.3.2.19]	-	-	-	gi|297746201|emb|CBI16257.3|/0/unnamed protein product [Vitis vinifera]
GSVIVT01011652001	4.73318	0.872664	K12116|1|0.0|865|vvi:100255972|flavin-binding kelch repeat F-box protein 1	-	GO:0005488//binding	GO:0009416//response to light stimulus;GO:0019941//modification-dependent protein catabolic process;GO:0009908//flower development;GO:0048511//rhythmic process;GO:0006351//transcription, DNA-dependent	gi|297737625|emb|CBI26826.3|/0/unnamed protein product [Vitis vinifera]
GSVIVT01020751001	11.4263	0.938733	-	-	-	-	gi|225446680|ref|XP_002277364.1|/5.26187e-67/PREDICTED: uncharacterized protein LOC100255766 [Vitis vinifera]
GSVIVT01024498001	-3.00194	0.882872	-	-	-	-	gi|297737395|emb|CBI26596.3|/0/unnamed protein product [Vitis vinifera]
GSVIVT01005679001	1.40543	0.803374	K08054|1|4e-78|289|vvi:100259611|calnexin	GO:0031090//organelle membrane;GO:0009536//plastid	GO:0005488//binding	-	gi|225447725|ref|XP_002277666.1|/4.84132e-77/PREDICTED: calnexin homolog [Vitis vinifera]
GSVIVT01029162001	3.91218	0.81449	K08235|1|2e-129|460|vvi:100252949|xyloglucan:xyloglucosyl transferase [EC:2.4.1.207];K14504|2|3e-128|456|vvi:100256520|xyloglucan:xyloglucosyl transferase TCH4 [EC:2.4.1.207]	GO:0005576//extracellular region;GO:0030312//external encapsulating structure	GO:0016798//hydrolase activity, acting on glycosyl bonds;GO:0016758//transferase activity, transferring hexosyl groups	GO:0044042//glucan metabolic process	gi|297735361|emb|CBI17801.3|/0/unnamed protein product [Vitis vinifera]
GSVIVT01019892001	1.88595	0.815117	K05277|1|6e-94|342|vvi:100233142|leucoanthocyanidin dioxygenase [EC:1.14.11.19]	-	GO:0016706//oxidoreductase activity, acting on paired donors, with incorporation or reduction of molecular oxygen, 2-oxoglutarate as one donor, and incorporation of one atom each of oxygen into both donors;GO:0019842//vitamin binding;GO:0043169//cation binding;GO:0016701//oxidoreductase activity, acting on single donors with incorporation of molecular oxygen	GO:0009699//phenylpropanoid biosynthetic process	gi|297742628|emb|CBI34777.3|/4.56787e-111/unnamed protein product [Vitis vinifera]
GSVIVT01008241001	-1.57579	0.824784	-	-	-	GO:0009725//response to hormone stimulus;GO:0006970//response to osmotic stress;GO:0010038//response to metal ion	gi|297734169|emb|CBI15416.3|/2.61855e-108/unnamed protein product [Vitis vinifera]
GSVIVT01023708001	-3.74002	0.922794	K01611|1|0.0|822|vvi:100241620|S-adenosylmethionine decarboxylase [EC:4.1.1.50]	-	GO:0016831//carboxy-lyase activity	GO:0006596//polyamine biosynthetic process	gi|147774304|emb|CAN76946.1|/0/hypothetical protein VITISV_017165 [Vitis vinifera]
GSVIVT01007880001	-1.58887	0.817452	K03695|1|0.0|1333|bdi:100825913|ATP-dependent Clp protease ATP-binding subunit ClpB	-	GO:0017111//nucleoside-triphosphatase activity;GO:0032559	GO:0009642//response to light intensity;GO:0044267//cellular protein metabolic process;GO:0000302//response to reactive oxygen species	gi|297733886|emb|CBI15133.3|/0/unnamed protein product [Vitis vinifera]
GSVIVT01000423001	1.65698	0.826125	K02183|1|6e-08|55.8|ppp:PHYPADRAFT_180168|calmodulin	-	GO:0046872//metal ion binding	-	gi|296081238|emb|CBI17982.3|/2.32113e-127/unnamed protein product [Vitis vinifera]
GSVIVT01031581001	5.18841	0.855147	K13692|1|6e-78|291|ath:AT1G05560|UDP-glucose:(indol-3-yl)acetate beta-D-glucosyltransferase [EC:2.4.1.121]	-	-	-	gi|296089569|emb|CBI39388.3|/0/unnamed protein product [Vitis vinifera]
GSVIVT01005301001	-2.23592	0.810489	-	GO:0043231//intracellular membrane-bounded organelle	-	-	gi|359496230|ref|XP_003635184.1|/0/PREDICTED: transcription factor bHLH123-like [Vitis vinifera]
GSVIVT01008060001	1.30967	0.805969	-	GO:0031090//organelle membrane;GO:0043231//intracellular membrane-bounded organelle	GO:0019901//protein kinase binding	-	gi|297734025|emb|CBI15272.3|/2.0042e-176/unnamed protein product [Vitis vinifera]
GSVIVT01035468001	2.70879	0.868253	K00279|1|0.0|932|vvi:100245801|cytokinin dehydrogenase [EC:1.5.99.12]	-	GO:0016645//oxidoreductase activity, acting on the CH-NH group of donors	GO:0009690//cytokinin metabolic process	gi|296081716|emb|CBI20721.3|/0/unnamed protein product [Vitis vinifera]
GSVIVT01019729001	-2.04104	0.830644	K09874|1|5e-123|439|aly:ARALYDRAFT_911337|aquaporin NIP	GO:0044459//plasma membrane part;GO:0031224//intrinsic to membrane	GO:0015563;GO:0005372//water transmembrane transporter activity;GO:0015103//inorganic anion transmembrane transporter activity	GO:0015698//inorganic anion transport;GO:0010036//response to boron-containing substance	gi|225426464|ref|XP_002276319.1|/3.33439e-144/PREDICTED: probable aquaporin NIP5-1 [Vitis vinifera]
GSVIVT01032732001	4.21431	0.936181	-	-	-	-	gi|359486364|ref|XP_003633435.1|/1.92069e-68/PREDICTED: uncharacterized protein LOC100248433 [Vitis vinifera]
GSVIVT01012511001	4.47023	0.84933	-	-	-	-	gi|225464087|ref|XP_002270896.1|/5.44689e-144/PREDICTED: uncharacterized isochorismatase family protein pncA [Vitis vinifera]
GSVIVT01036604001	-1.40577	0.815614	-	-	-	-	gi|225464015|ref|XP_002265615.1|/0/PREDICTED: uncharacterized protein LOC100264272 [Vitis vinifera]
GSVIVT01032658001	-2.51409	0.822664	K03145|1|9e-50|195|rcu:RCOM_1058130|transcription elongation factor S-II	-	GO:0005488//binding	GO:0006351//transcription, DNA-dependent	gi|297736471|emb|CBI25342.3|/1.33175e-166/unnamed protein product [Vitis vinifera]
GSVIVT01009424001	3.24499	0.898119	K09422|1|2e-76|284|vvi:100233128|myb proto-oncogene protein, plant	-	-	-	gi|302142263|emb|CBI19466.3|/3.21912e-126/unnamed protein product [Vitis vinifera]
GSVIVT01037044001	-1.511	0.821497	-	GO:0009534//chloroplast thylakoid	-	-	gi|225429185|ref|XP_002275810.1|/3.21588e-106/PREDICTED: uncharacterized protein LOC100266884 [Vitis vinifera]
GSVIVT01032702001	-5.88343	0.97699	-	GO:0043231//intracellular membrane-bounded organelle	GO:0046914//transition metal ion binding;GO:0003676//nucleic acid binding	-	gi|225448647|ref|XP_002279538.1|/2.73635e-88/PREDICTED: uncharacterized protein LOC100241651 [Vitis vinifera]
GSVIVT01013367001	-2.6275	0.895069	K03781|1|0.0|1041|vvi:100244516|catalase [EC:1.11.1.6]	GO:0005840//ribosome;GO:0000325//plant-type vacuole;GO:0009526//plastid envelope;GO:0042579//microbody;GO:0031090//organelle membrane	GO:0005275//amine transmembrane transporter activity;GO:0004601//peroxidase activity;GO:0005506//iron ion binding	GO:0009267//cellular response to starvation;GO:0009416//response to light stimulus;GO:0019725//cellular homeostasis;GO:0042743//hydrogen peroxide metabolic process;GO:0015837//amine transport	gi|359491906|ref|XP_002270703.2|/0/PREDICTED: catalase isozyme 1 isoform 1 [Vitis vinifera]
GSVIVT01017356001	-1.69465	0.811959	-	GO:0009536//plastid	-	-	gi|297743481|emb|CBI36348.3|/4.52827e-65/unnamed protein product [Vitis vinifera]
GSVIVT01014264001	4.80682	0.925627	-	-	-	-	gi|225461562|ref|XP_002285236.1|/0/PREDICTED: uncharacterized protein LOC100257151 [Vitis vinifera]
GSVIVT01033177001	2.95291	0.86051	K00306|1|2e-31|135|bdi:100834553|sarcosine oxidase / L-pipecolate oxidase [EC:1.5.3.1 1.5.3.7]	-	GO:0016647//oxidoreductase activity, acting on the CH-NH group of donors, oxygen as acceptor	GO:0006760//folic acid-containing compound metabolic process	gi|296083791|emb|CBI24008.3|/1.01784e-144/unnamed protein product [Vitis vinifera]
GSVIVT01025339001	3.36661	0.884364	K00454|1|0.0|1767|vvi:100243312|lipoxygenase [EC:1.13.11.12]	-	GO:0046914//transition metal ion binding;GO:0016702//oxidoreductase activity, acting on single donors with incorporation of molecular oxygen, incorporation of two atoms of oxygen	GO:0006633//fatty acid biosynthetic process	gi|225435556|ref|XP_002285574.1|/0/PREDICTED: linoleate 13S-lipoxygenase 2-1, chloroplastic [Vitis vinifera]
GSVIVT01029943001	-3.92524	0.808867	-	-	-	-	gi|296085888|emb|CBI31212.3|/0/unnamed protein product [Vitis vinifera]
GSVIVT01033066001	3.92353	0.887457	-	-	-	-	gi|225451485|ref|XP_002271244.1|/8.63622e-59/PREDICTED: uncharacterized protein LOC100263446 [Vitis vinifera]
GSVIVT01000012001	5.69545	0.899178	K13422|1|1e-09|62.8|ppp:PHYPADRAFT_164647|transcription factor MYC2	GO:0043231//intracellular membrane-bounded organelle	-	-	gi|359487778|ref|XP_002281083.2|/1.4114e-160/PREDICTED: transcription factor bHLH96-like [Vitis vinifera]
GSVIVT01020559001	-1.95303	0.826406	K10143|1|1e-83|305|mtr:MTR_2g085210|E3 ubiquitin-protein ligase RFWD2 [EC:6.3.2.19]	-	GO:0016301//kinase activity;GO:0016628//oxidoreductase activity, acting on the CH-CH group of donors, NAD or NADP as acceptor;GO:0032559	GO:0006464//cellular protein modification process	gi|302143300|emb|CBI21861.3|/4.41349e-125/unnamed protein product [Vitis vinifera]
GSVIVT01030474001	3.84499	0.915225	K10528|1|0.0|924|vvi:100251750|hydroperoxide lyase [EC:4.1.2.-]	-	GO:0016491//oxidoreductase activity;GO:0005506//iron ion binding;GO:0016836//hydro-lyase activity	-	gi|297739186|emb|CBI28837.3|/0/unnamed protein product [Vitis vinifera]
GSVIVT01007961001	-2.66446	0.872253	K09553|1|4e-09|61.6|cme:CMR299C|stress-induced-phosphoprotein 1;K12795|4|6e-08|57.8|cre:CHLREDRAFT_108398|suppressor of G2 allele of SKP1	-	GO:0046914//transition metal ion binding;GO:0004713//protein tyrosine kinase activity;GO:0042623//ATPase activity, coupled;GO:0032559	GO:0006464//cellular protein modification process	gi|297733938|emb|CBI15185.3|/0/unnamed protein product [Vitis vinifera]
GSVIVT01016690001	1.50492	0.814554	K01206|1|3e-26|118|aly:ARALYDRAFT_475890|alpha-L-fucosidase [EC:3.2.1.51];K00514|3|3e-21|101|rcu:RCOM_1428040|zeta-carotene desaturase [EC:1.3.5.6]	-	GO:0016788//hydrolase activity, acting on ester bonds	GO:0044238//primary metabolic process	gi|225442009|ref|XP_002271802.1|/0/PREDICTED: GDSL esterase/lipase 1 [Vitis vinifera]
GSVIVT01009376001	1.72685	0.801708	K00360|1|1e-12|71.2|ppp:PHYPADRAFT_184973|nitrate reductase (NADH) [EC:1.7.1.1];K13076|4|4e-10|62.4|zma:100279397|delta8-fatty-acid desaturase [EC:1.14.19.4]	-	GO:0005506//iron ion binding	GO:0006952//defense response	gi|225458786|ref|XP_002285164.1|/1.5953e-79/PREDICTED: cytochrome b5 [Vitis vinifera]
GSVIVT01033017001	6.30176	0.831401	K12135|1|7e-18|90.1|ath:AT5G15840|zinc finger protein CONSTANS	-	-	-	gi|147785055|emb|CAN77743.1|/2.55005e-134/hypothetical protein VITISV_043320 [Vitis vinifera]
GSVIVT01035397001	1.78933	0.832396	K10576|1|3e-53|208|vvi:100250088|ubiquitin-conjugating enzyme E2 H [EC:6.3.2.19];K13415|2|1e-41|169|sbi:SORBI_03g032990|protein brassinosteroid insensitive 1 [EC:2.7.10.1 2.7.11.1];K00924|5|7e-41|167|ath:AT1G28440|[EC:2.7.1.-]	-	GO:0005488//binding	-	gi|296081654|emb|CBI20659.3|/0/unnamed protein product [Vitis vinifera]
GSVIVT01033392001	3.85139	0.905234	-	GO:0009536//plastid	-	GO:0010467//gene expression;GO:0009767//photosynthetic electron transport chain	gi|359482119|ref|XP_002276941.2|/0/PREDICTED: uncharacterized protein LOC100267590 [Vitis vinifera]
GSVIVT01022814001	4.05909	0.856185	K00540|1|7e-124|441|ath:AT3G22360|[EC:1.-.-.-]	GO:0019866//organelle inner membrane;GO:0043231//intracellular membrane-bounded organelle;GO:0031224//intrinsic to membrane	GO:0043169//cation binding;GO:0016682//oxidoreductase activity, acting on diphenols and related substances as donors, oxygen as acceptor	GO:0051234//establishment of localization;GO:0032501//multicellular organismal process;GO:0006950//response to stress;GO:0007165//signal transduction;GO:0015980//energy derivation by oxidation of organic compounds	gi|225427478|ref|XP_002262811.1|/0/PREDICTED: alternative oxidase 1a, mitochondrial [Vitis vinifera]
GSVIVT01037742001	6.34225	0.901817	-	-	-	-	gi|359494092|ref|XP_002276850.2|/2.85039e-09/PREDICTED: uncharacterized protein LOC100257132 [Vitis vinifera]
GSVIVT01009045001	5.78522	0.874546	K14411|1|1e-13|78.6|sbi:SORBI_02g005670|RNA-binding protein Musashi	-	GO:0003676//nucleic acid binding	-	gi|359492447|ref|XP_003634414.1|/3.30085e-83/PREDICTED: uncharacterized protein LOC100253997 [Vitis vinifera]
GSVIVT01009338001	2.30345	0.880298	K09377|1|1e-101|368|mtr:MTR_1g017950|cysteine and glycine-rich protein	-	GO:0046914//transition metal ion binding	-	gi|225458850|ref|XP_002285355.1|/5.14699e-117/PREDICTED: pollen-specific protein SF3 [Vitis vinifera]
GSVIVT01036110001	-2.62651	0.862305	-	-	-	-	gi|296084899|emb|CBI28308.3|/1.83555e-123/unnamed protein product [Vitis vinifera]
GSVIVT01030264001	1.7452	0.825151	-	GO:0031224//intrinsic to membrane;GO:0043231//intracellular membrane-bounded organelle	-	GO:0051234//establishment of localization	gi|297735603|emb|CBI18097.3|/0/unnamed protein product [Vitis vinifera]
GSVIVT01015717001	4.0928	0.86503	-	-	-	-	gi|296087461|emb|CBI34050.3|/1.4945e-09/unnamed protein product [Vitis vinifera]
GSVIVT01037055001	-2.28714	0.881099	-	-	GO:0005102//receptor binding	-	gi|225429199|ref|XP_002276272.1|/5.30549e-30/PREDICTED: phytosulfokines 3 [Vitis vinifera]
GSVIVT01007781001	-2.16703	0.856942	K13496|1|2e-38|157|ath:AT2G36780|UDP-glucosyl transferase 73C [EC:2.4.1.-]	-	GO:0016757//transferase activity, transferring glycosyl groups	-	gi|147800509|emb|CAN70846.1|/0/hypothetical protein VITISV_006661 [Vitis vinifera]
GSVIVT01031123001	3.72899	0.88683	K11251|1|1e-37|154|vvi:100256203|histone H2A	GO:0000785//chromatin;GO:0043231//intracellular membrane-bounded organelle	GO:0003676//nucleic acid binding	GO:0034728//nucleosome organization	gi|225450811|ref|XP_002283971.1|/1.26843e-36/PREDICTED: probable histone H2A.5 [Vitis vinifera]
GSVIVT01031601001	4.06634	0.860705	K08235|1|8e-156|548|vvi:100263523|xyloglucan:xyloglucosyl transferase [EC:2.4.1.207]	GO:0005576//extracellular region;GO:0030312//external encapsulating structure	GO:0016798//hydrolase activity, acting on glycosyl bonds;GO:0016758//transferase activity, transferring hexosyl groups	GO:0044042//glucan metabolic process	gi|225433616|ref|XP_002262761.1|/1.04075e-154/PREDICTED: brassinosteroid-regulated protein BRU1 [Vitis vinifera]
GSVIVT01029179001	-1.71805	0.825865	-	GO:0044464//cell part	-	-	gi|297735378|emb|CBI17818.3|/7.45985e-94/unnamed protein product [Vitis vinifera]
GSVIVT01036696001	-1.7554	0.846129	-	-	-	-	gi|225462332|ref|XP_002268572.1|/0/PREDICTED: uncharacterized protein LOC100258644 [Vitis vinifera]
GSVIVT01027794001	9.65629	0.814057	-	-	-	-	gi|296083640|emb|CBI23629.3|/2.77181e-33/unnamed protein product [Vitis vinifera]
GSVIVT01003748001	-1.31584	0.805147	K15400|1|2e-58|225|vvi:100245819|omega-hydroxypalmitate O-feruloyl transferase [EC:2.3.1.188]	-	GO:0016747//transferase activity, transferring acyl groups other than amino-acyl groups	-	gi|225469071|ref|XP_002270329.1|/0/PREDICTED: omega-hydroxypalmitate O-feruloyl transferase [Vitis vinifera]
GSVIVT01025266001	-2.08746	0.833045	-	GO:0044464//cell part	GO:0015291//secondary active transmembrane transporter activity	GO:0015893//drug transport	gi|225435446|ref|XP_002285445.1|/0/PREDICTED: MATE efflux family protein 1 [Vitis vinifera]
GSVIVT01012773001	-1.43661	0.810597	K03686|1|2e-10|64.7|bdi:100841335|molecular chaperone DnaJ	GO:0009536//plastid	GO:0005515//protein binding	-	gi|225460530|ref|XP_002272533.1|/4.15548e-94/PREDICTED: uncharacterized protein LOC100252905 [Vitis vinifera]
GSVIVT01037021001	3.6653	0.910597	-	-	-	-	gi|297736386|emb|CBI25109.3|/0/unnamed protein product [Vitis vinifera]
GSVIVT01008396001	3.09528	0.828179	K10529|1|0.0|860|pop:POPTR_820569|alpha-dioxygenase [EC:1.-.-.-]	-	GO:0016209//antioxidant activity;GO:0005506//iron ion binding;GO:0016705//oxidoreductase activity, acting on paired donors, with incorporation or reduction of molecular oxygen;GO:0016701//oxidoreductase activity, acting on single donors with incorporation of molecular oxygen	GO:0010260//organ senescence;GO:0009607//response to biotic stimulus;GO:0006950//response to stress;GO:0006631//fatty acid metabolic process	gi|225456100|ref|XP_002281357.1|/0/PREDICTED: prostaglandin G/H synthase 1 [Vitis vinifera]
GSVIVT01027015001	1.98768	0.853568	K13076|1|0.0|739|vvi:100265385|delta8-fatty-acid desaturase [EC:1.14.19.4]	-	GO:0016491//oxidoreductase activity;GO:0005506//iron ion binding	GO:0006629//lipid metabolic process	gi|297745371|emb|CBI40451.3|/0/unnamed protein product [Vitis vinifera]
GSVIVT01005051001	1.88918	0.853785	K13448|1|1e-109|394|vvi:100248601|calcium-binding protein CML	-	GO:0046872//metal ion binding	-	gi|296087059|emb|CBI33386.3|/2.69599e-133/unnamed protein product [Vitis vinifera]
GSVIVT01002034001	2.26281	0.86981	-	-	-	-	gi|225470342|ref|XP_002269338.1|/6.59976e-126/PREDICTED: CBS domain-containing protein CBSX5 [Vitis vinifera]
GSVIVT01010208001	-1.82862	0.817301	K13412|1|4e-06|52.0|vcn:VOLCADRAFT_74309|calcium-dependent protein kinase [EC:2.7.11.1]	GO:0044464//cell part	-	-	gi|225425086|ref|XP_002271879.1|/0/PREDICTED: uncharacterized protein LOC100247873 [Vitis vinifera]
GSVIVT01028287001	1.80177	0.805493	-	-	-	-	gi|225437822|ref|XP_002262678.1|/2.43381e-91/PREDICTED: uncharacterized protein LOC100244659 [Vitis vinifera]
GSVIVT01018482001	-1.40028	0.820285	-	GO:0043231//intracellular membrane-bounded organelle	GO:0051536//iron-sulfur cluster binding	-	gi|225455596|ref|XP_002269624.1|/6.18806e-55/PREDICTED: CDGSH iron-sulfur domain-containing protein 2-like [Vitis vinifera]
GSVIVT01009065001	4.88336	0.953049	-	-	-	-	gi|225459247|ref|XP_002285762.1|/3.96091e-162/PREDICTED: uncharacterized protein LOC100259041 [Vitis vinifera]
GSVIVT01027404001	-2.27932	0.804022	K00517|1|0.0|634|ath:AT1G01190|[EC:1.14.-.-];K05280|5|6e-70|263|aly:ARALYDRAFT_487632|flavonoid 3'-monooxygenase [EC:1.14.13.21]	-	GO:0004497//monooxygenase activity;GO:0005506//iron ion binding	GO:0008152//metabolic process	gi|225453569|ref|XP_002266493.1|/0/PREDICTED: cytochrome P450 78A3 [Vitis vinifera]
GSVIVT01035548001	-4.21288	0.887608	K01669|1|0.0|1106|vvi:100252689|deoxyribodipyrimidine photo-lyase [EC:4.1.99.3]	GO:0009536//plastid	GO:0003676//nucleic acid binding;GO:0003913//DNA photolyase activity	GO:0006259//DNA metabolic process;GO:0006464//cellular protein modification process	gi|296081780|emb|CBI20785.3|/0/unnamed protein product [Vitis vinifera]
GSVIVT01008398001	2.05115	0.846345	K05350|1|0.0|1069|vvi:100255914|beta-glucosidase [EC:3.2.1.21]	GO:0005840//ribosome;GO:0005618//cell wall;GO:0031410//cytoplasmic vesicle	GO:0043167//ion binding;GO:0015923//mannosidase activity;GO:0008422//beta-glucosidase activity	GO:0044238//primary metabolic process	gi|225456104|ref|XP_002281407.1|/0/PREDICTED: beta-glucosidase 44 [Vitis vinifera]
GSVIVT01029175001	7.05303	0.935121	K08235|1|1e-154|543|vvi:100246166|xyloglucan:xyloglucosyl transferase [EC:2.4.1.207];K14504|2|4e-147|519|vvi:100256520|xyloglucan:xyloglucosyl transferase TCH4 [EC:2.4.1.207]	GO:0005576//extracellular region;GO:0030312//external encapsulating structure	GO:0016798//hydrolase activity, acting on glycosyl bonds;GO:0016758//transferase activity, transferring hexosyl groups	GO:0044042//glucan metabolic process	gi|359485091|ref|XP_003633213.1|/0/PREDICTED: probable xyloglucan endotransglucosylase/hydrolase protein 23-like [Vitis vinifera]
GSVIVT01008116001	1.42339	0.80173	-	-	-	-	gi|297734074|emb|CBI15321.3|/1.95512e-50/unnamed protein product [Vitis vinifera]
GSVIVT01015288001	2.49227	0.854866	K01301|1|0.0|761|zma:100280900|glutamate carboxypeptidase II [EC:3.4.17.21]	GO:0043231//intracellular membrane-bounded organelle	GO:0016491//oxidoreductase activity;GO:0008238//exopeptidase activity	GO:0019538//protein metabolic process	gi|359484534|ref|XP_002283565.2|/0/PREDICTED: probable glutamate carboxypeptidase 2-like isoform 1 [Vitis vinifera]
GSVIVT01019910001	1.53977	0.824654	K00517|1|2e-62|238|osa:4348172|[EC:1.14.-.-];K16084|3|3e-53|207|osa:4329723|cytochrome P450, family 76, subfamily M, polypeptide 7 (ent-cassa-12,15-diene 11-hydroxylase) [EC:1.14.13.145];K05280|4|3e-44|177|vvi:100263810|flavonoid 3'-monooxygenase [EC:1.14.13.21]	-	GO:0046872//metal ion binding;GO:0016491//oxidoreductase activity	-	gi|359474277|ref|XP_003631428.1|/0/PREDICTED: LOW QUALITY PROTEIN: 7-ethoxycoumarin O-deethylase-like [Vitis vinifera]
GSVIVT01006794001	3.6832	0.874308	K00422|1|6e-145|512|vvi:100256583|polyphenol oxidase [EC:1.10.3.1]	GO:0009534//chloroplast thylakoid	GO:0043169//cation binding;GO:0016682//oxidoreductase activity, acting on diphenols and related substances as donors, oxygen as acceptor;GO:0022892	GO:0008152//metabolic process;GO:0015669//gas transport	gi|297736730|emb|CBI25830.3|/0/unnamed protein product [Vitis vinifera]
GSVIVT01008862001	-1.32633	0.809862	K13600|1|0.0|1077|vvi:100247245|chlorophyllide a oxygenase [EC:1.14.13.122]	GO:0034357;GO:0009528//plastid inner membrane	GO:0051536//iron-sulfur cluster binding;GO:0046914//transition metal ion binding;GO:0016703	GO:0006779//porphyrin-containing compound biosynthetic process	gi|359492578|ref|XP_002284499.2|/0/PREDICTED: chlorophyllide a oxygenase, chloroplastic-like [Vitis vinifera]
GSVIVT01030243001	1.49741	0.80026	-	-	-	-	gi|297735586|emb|CBI18080.3|/7.17131e-68/unnamed protein product [Vitis vinifera]
GSVIVT01014066001	-1.96328	0.860316	K05356|1|0.0|796|vvi:100246988|all-trans-nonaprenyl-diphosphate synthase [EC:2.5.1.84 2.5.1.85]	GO:0009536//plastid	GO:0016765//transferase activity, transferring alkyl or aryl (other than methyl) groups	GO:0006720//isoprenoid metabolic process;GO:0006743//ubiquinone metabolic process	gi|225461848|ref|XP_002285665.1|/0/PREDICTED: prenyl transferase-like [Vitis vinifera]
GSVIVT01001089001	1.72157	0.800216	K09286|1|9e-15|79.3|ath:AT1G43160|EREBP-like factor	-	-	-	gi|225425266|ref|XP_002267814.1|/4.02493e-56/PREDICTED: ethylene-responsive transcription factor ERF113 [Vitis vinifera]
GSVIVT01011881001	2.11587	0.843382	-	-	-	GO:0050896//response to stimulus	gi|225424007|ref|XP_002283457.1|/7.98221e-94/PREDICTED: universal stress protein YxiE-like [Vitis vinifera]
GSVIVT01016276001	-1.39559	0.822491	K09872|1|2e-142|503|rcu:RCOM_1356060|aquaporin PIP	GO:0031224//intrinsic to membrane	-	GO:0006810//transport	gi|55982653|gb|AAV69744.1|/4.54202e-163/aquaporin [Vitis vinifera]
GSVIVT01001654001	-5.64938	0.888041	-	-	-	-	gi|147770432|emb|CAN75893.1|/2.68824e-49/hypothetical protein VITISV_009390 [Vitis vinifera]
GSVIVT01000521001	2.09797	0.823443	K00660|1|0.0|432|vvi:100258106|chalcone synthase [EC:2.3.1.74]	-	GO:0016747//transferase activity, transferring acyl groups other than amino-acyl groups	GO:0009699//phenylpropanoid biosynthetic process	gi|18376653|dbj|BAB84111.1|/0/chalcone synthase [Vitis vinifera]
GSVIVT01007740001	2.13515	0.843036	K09422|1|3e-121|432|vvi:100244963|myb proto-oncogene protein, plant	GO:0043231//intracellular membrane-bounded organelle	GO:0003676//nucleic acid binding	GO:0003002//regionalization;GO:0009913//epidermal cell differentiation;GO:0000904//cell morphogenesis involved in differentiation	gi|359491528|ref|XP_002279128.2|/1.39751e-115/PREDICTED: transcription factor WER-like [Vitis vinifera]
GSVIVT01015745001	2.47098	0.857829	K13030|1|2e-98|211|sbi:SORBI_01g001220|cyanohydrin beta-glucosyltransferase [EC:2.4.1.85];K13493|3|2e-55|147|ath:AT5G05870|cytokinin-N-glucosyltransferase [EC:2.4.1.-]	-	GO:0016758//transferase activity, transferring hexosyl groups	-	gi|225465718|ref|XP_002263056.1|/0/PREDICTED: UDP-glycosyltransferase 85A2 isoform 1 [Vitis vinifera]
GSVIVT01011155001	2.14283	0.847772	K05857|1|0.0|1077|vvi:100243703|phosphatidylinositol phospholipase C, delta [EC:3.1.4.11]	-	GO:0046872//metal ion binding;GO:0004629//phospholipase C activity;GO:0060089	GO:0044238//primary metabolic process;GO:0007165//signal transduction	gi|296083156|emb|CBI22792.3|/0/unnamed protein product [Vitis vinifera]
GSVIVT01006259001	-1.96857	0.842777	-	-	-	-	gi|225431364|ref|XP_002278653.1|/3.24554e-88/PREDICTED: ganglioside-induced differentiation-associated protein 2 [Vitis vinifera]
GSVIVT01027787001	4.04682	0.917128	-	-	-	-	gi|296083632|emb|CBI23621.3|/6.65245e-18/unnamed protein product [Vitis vinifera]
GSVIVT01027049001	2.69553	0.88551	-	GO:0031224//intrinsic to membrane	-	-	gi|225454450|ref|XP_002280494.1|/1.10083e-16/PREDICTED: arabinogalactan peptide 20 [Vitis vinifera]
GSVIVT01003554001	3.8657	0.911786	K14498|1|0.0|688|vvi:100240941|serine/threonine-protein kinase SRK2 [EC:2.7.11.1]	-	GO:0004672//protein kinase activity;GO:0032559	GO:0006464//cellular protein modification process	gi|225470483|ref|XP_002264172.1|/0/PREDICTED: serine/threonine-protein kinase SRK2I isoform 1 [Vitis vinifera]
GSVIVT01031895001	-1.97008	0.826406	-	GO:0043231//intracellular membrane-bounded organelle	-	-	gi|225428588|ref|XP_002284707.1|/3.62227e-67/PREDICTED: CASP-like protein At1g49405 [Vitis vinifera]
GSVIVT01031593001	4.8818	0.845112	K08235|1|3e-152|536|vvi:100263523|xyloglucan:xyloglucosyl transferase [EC:2.4.1.207]	GO:0005576//extracellular region;GO:0030312//external encapsulating structure	GO:0016798//hydrolase activity, acting on glycosyl bonds;GO:0016758//transferase activity, transferring hexosyl groups	GO:0044042//glucan metabolic process	gi|225463293|ref|XP_002266082.1|/5.16518e-154/PREDICTED: brassinosteroid-regulated protein BRU1 isoform 1 [Vitis vinifera]
GSVIVT01029852001	-2.71412	0.866674	K13448|1|4e-76|283|vvi:100251912|calcium-binding protein CML	-	GO:0046872//metal ion binding	GO:0000904//cell morphogenesis involved in differentiation	gi|296085824|emb|CBI31148.3|/1.03255e-158/unnamed protein product [Vitis vinifera]
GSVIVT01004073001	2.55183	0.881207	K14570|1|3e-18|91.7|ota:Ot08g01800|RNA exonuclease 1 [EC:3.1.-.-]	GO:0009534//chloroplast thylakoid	-	-	gi|225470567|ref|XP_002272662.1|/7.77069e-169/PREDICTED: uncharacterized protein LOC100264929 [Vitis vinifera]
GSVIVT01018663001	-2.36545	0.87686	-	GO:0044439	GO:0005515//protein binding	GO:0007031//peroxisome organization	gi|225466121|ref|XP_002267934.1|/2.09332e-120/PREDICTED: peroxisomal membrane protein 11-4 [Vitis vinifera]
GSVIVT01003677001	1.53909	0.808088	-	-	-	-	gi|359495710|ref|XP_003635067.1|/1.32118e-137/PREDICTED: uncharacterized protein LOC100246768 isoform 1 [Vitis vinifera]
GSVIVT01028741001	3.10418	0.854823	-	GO:0031224//intrinsic to membrane	-	-	gi|225462683|ref|XP_002265607.1|/6.67689e-18/PREDICTED: arabinogalactan peptide 20 [Vitis vinifera]
GSVIVT01014428001	-2.74001	0.870004	-	-	-	-	gi|225461324|ref|XP_002284551.1|/4.61785e-146/PREDICTED: uncharacterized protein LOC100267532 [Vitis vinifera]
GSVIVT01032374001	2.42284	0.816522	K01206|1|1e-87|322|ath:AT1G67830|alpha-L-fucosidase [EC:3.2.1.51];K00514|3|1e-28|126|rcu:RCOM_1428040|zeta-carotene desaturase [EC:1.3.5.6]	GO:0005618//cell wall	GO:0016787//hydrolase activity	GO:0044238//primary metabolic process	gi|225452286|ref|XP_002271320.1|/0/PREDICTED: GDSL esterase/lipase At5g14450-like [Vitis vinifera]
GSVIVT01017223001	8.0786	0.813084	K13862|1|6e-22|104|ota:Ot04g03190|solute carrier family 4 (sodium borate transporter), member 11	GO:0031224//intrinsic to membrane	GO:0015301//anion:anion antiporter activity;GO:0015562//efflux transmembrane transporter activity	GO:0006820//anion transport;GO:0010036//response to boron-containing substance	gi|225442807|ref|XP_002285279.1|/0/PREDICTED: boron transporter 4 [Vitis vinifera]
GSVIVT01019841001	2.04354	0.847037	-	-	-	-	gi|225426799|ref|XP_002276431.1|/3.15886e-94/PREDICTED: thaumatin-like protein [Vitis vinifera]
GSVIVT01022205001	-3.56312	0.884299	K09755|1|2e-130|464|rcu:RCOM_0193830|ferulate-5-hydroxylase [EC:1.14.-.-]	-	GO:0016709//oxidoreductase activity, acting on paired donors, with incorporation or reduction of molecular oxygen, NAD(P)H as one donor, and incorporation of one atom of oxygen;GO:0005506//iron ion binding	GO:0008152//metabolic process	gi|296082482|emb|CBI21487.3|/0/unnamed protein product [Vitis vinifera]
GSVIVT01019523001	-1.53161	0.825281	K01179|1|3e-134|478|vvi:100260645|endoglucanase [EC:3.2.1.4]	GO:0044464//cell part	GO:0016798//hydrolase activity, acting on glycosyl bonds;GO:0005488//binding	GO:0044238//primary metabolic process	gi|225426356|ref|XP_002270880.1|/0/PREDICTED: endoglucanase 6 [Vitis vinifera]
GSVIVT01021309001	3.92174	0.886008	K01206|1|1e-24|112|ath:AT1G67830|alpha-L-fucosidase [EC:3.2.1.51];K00514|3|2e-23|108|rcu:RCOM_1428040|zeta-carotene desaturase [EC:1.3.5.6]	-	GO:0016787//hydrolase activity	GO:0044238//primary metabolic process	gi|225462452|ref|XP_002266118.1|/0/PREDICTED: GDSL esterase/lipase At5g45670 [Vitis vinifera]
GSVIVT01011412001	2.84775	0.894723	-	-	-	-	gi|225452811|ref|XP_002283517.1|/4.9807e-43/PREDICTED: gibberellin-regulated protein 4 [Vitis vinifera]
GSVIVT01032047001	4.87906	0.881985	K11253|1|3e-31|132|vcn:VOLCADRAFT_101585|histone H3	GO:0043231//intracellular membrane-bounded organelle	GO:0005488//binding	-	gi|297736214|emb|CBI24852.3|/1.85848e-39/unnamed protein product [Vitis vinifera]
GSVIVT01032392001	2.76696	0.849048	-	-	GO:0016853//isomerase activity	GO:0006575//cellular modified amino acid metabolic process	gi|296087597|emb|CBI34853.3|/5.59405e-132/unnamed protein product [Vitis vinifera]
GSVIVT01028204001	1.75971	0.856747	K08912|1|3e-101|365|vvi:100252066|light-harvesting complex II chlorophyll a/b binding protein 1	GO:0044464//cell part	-	GO:0044237//cellular metabolic process	gi|297744047|emb|CBI37017.3|/5.17732e-107/unnamed protein product [Vitis vinifera]
GSVIVT01017066001	2.40959	0.854369	K10418|1|5e-18|89.7|smo:SELMODRAFT_131219|dynein light chain LC8-type	GO:0043231//intracellular membrane-bounded organelle;GO:0015630//microtubule cytoskeleton	GO:0003774//motor activity	GO:0048468//cell development;GO:0048513//organ development	gi|225442599|ref|XP_002284463.1|/4.40443e-49/PREDICTED: dynein light chain LC6, flagellar outer arm [Vitis vinifera]
GSVIVT01025316001	4.19534	0.896648	K11253|1|7e-37|150|mtr:MTR_1g105310|histone H3	GO:0043231//intracellular membrane-bounded organelle	GO:0005488//binding	-	gi|297746363|emb|CBI16419.3|/6.00081e-72/unnamed protein product [Vitis vinifera]
GSVIVT01008003001	1.859	0.860424	-	-	-	-	gi|225457421|ref|XP_002284937.1|/8.75855e-55/PREDICTED: gibberellin-regulated protein 6 [Vitis vinifera]
GSVIVT01014054001	2.76131	0.823789	-	-	-	-	gi|147768464|emb|CAN67975.1|/5.66678e-14/hypothetical protein VITISV_011501 [Vitis vinifera]
GSVIVT01001809001	1.43052	0.81183	-	-	-	-	gi|225452132|ref|XP_002262897.1|/5.37057e-86/PREDICTED: uncharacterized protein At3g27210-like [Vitis vinifera]
GSVIVT01002886001	1.98034	0.802509	-	-	-	-	gi|296084756|emb|CBI25900.3|/1.1891e-106/unnamed protein product [Vitis vinifera]
GSVIVT01016307001	2.48917	0.868447	K08249|1|0.0|950|vvi:100251399|hydroxymandelonitrile lyase [EC:4.1.2.11]	GO:0044464//cell part	GO:0004180//carboxypeptidase activity	GO:0019538//protein metabolic process	gi|225449100|ref|XP_002274723.1|/0/PREDICTED: serine carboxypeptidase-like 27 [Vitis vinifera]
GSVIVT01030658001	3.52687	0.832677	K07374|1|5e-20|94.0|mtr:MTR_4g097830|tubulin alpha	GO:0032991//macromolecular complex;GO:0015630//microtubule cytoskeleton	GO:0017111//nucleoside-triphosphatase activity;GO:0032561//guanyl ribonucleotide binding	GO:0043623//cellular protein complex assembly;GO:0009207;GO:0007017//microtubule-based process	gi|296087075|emb|CBI33449.3|/1.24975e-32/unnamed protein product [Vitis vinifera]
GSVIVT01035140001	2.08795	0.868793	-	-	-	-	gi|225431741|ref|XP_002269079.1|/1.26473e-49/PREDICTED: phylloplanin [Vitis vinifera]
GSVIVT01008476001	1.87185	0.856553	K13413|1|1e-46|184|vvi:100258699|mitogen-activated protein kinase kinase 4/5, plant [EC:2.7.12.2]	-	GO:0005488//binding;GO:0004712//protein serine/threonine/tyrosine kinase activity;GO:0019887//protein kinase regulator activity	GO:0000160//two-component signal transduction system (phosphorelay);GO:0001932//regulation of protein phosphorylation;GO:0009700//indole phytoalexin biosynthetic process;GO:0006355//regulation of transcription, DNA-dependent;GO:0009692;GO:0006970//response to osmotic stress	gi|297734361|emb|CBI15608.3|/6.5025e-107/unnamed protein product [Vitis vinifera]
GSVIVT01008723001	-1.55349	0.810921	-	GO:0044464//cell part	GO:0003676//nucleic acid binding	-	gi|225459781|ref|XP_002284786.1|/7.6836e-154/PREDICTED: high mobility group B protein 9 [Vitis vinifera]
GSVIVT01009760001	3.09527	0.900108	K08999|1|4e-30|131|rcu:RCOM_0783240|hypothetical protein	-	GO:0016788//hydrolase activity, acting on ester bonds;GO:0003676//nucleic acid binding	GO:0006952//defense response;GO:0006281//DNA repair	gi|302142539|emb|CBI19742.3|/0/unnamed protein product [Vitis vinifera]
GSVIVT01034337001	2.13294	0.802141	K07407|1|0.0|850|vvi:100245638|alpha-galactosidase [EC:3.2.1.22]	GO:0005576//extracellular region;GO:0005618//cell wall	GO:0043167//ion binding;GO:0015925	GO:0044238//primary metabolic process	gi|225463807|ref|XP_002270791.1|/0/PREDICTED: alpha-galactosidase [Vitis vinifera]
GSVIVT01024811001	3.72643	0.912111	-	-	-	-	gi|225434704|ref|XP_002280988.1|/4.7921e-87/PREDICTED: uncharacterized protein LOC100258718 [Vitis vinifera]
GSVIVT01030494001	-1.77371	0.854585	K14638|1|7e-123|440|ppp:PHYPADRAFT_189464|solute carrier family 15 (peptide/histidine transporter), member 3/4	GO:0044464//cell part	GO:0016798//hydrolase activity, acting on glycosyl bonds	GO:0044238//primary metabolic process;GO:0015833//peptide transport	gi|297739204|emb|CBI28855.3|/0/unnamed protein product [Vitis vinifera]
GSVIVT01017843001	-1.38645	0.809775	-	-	-	-	gi|359477457|ref|XP_002278619.2|/4.98007e-135/PREDICTED: uncharacterized protein LOC100252741 [Vitis vinifera]
GSVIVT01018114001	-1.38167	0.82048	K11275|1|6e-20|95.9|bdi:100833820|histone H1/5	GO:0005694//chromosome	-	-	gi|297737166|emb|CBI26367.3|/2.0341e-40/unnamed protein product [Vitis vinifera]
GSVIVT01003989001	-1.88029	0.82766	K00006|1|0.0|754|vvi:100261224|glycerol-3-phosphate dehydrogenase (NAD+) [EC:1.1.1.8]	GO:0043234//protein complex;GO:0044424//intracellular part	GO:0042802//identical protein binding;GO:0016616//oxidoreductase activity, acting on the CH-OH group of donors, NAD or NADP as acceptor;GO:0048037//cofactor binding;GO:0000166//nucleotide binding	GO:0006072//glycerol-3-phosphate metabolic process	gi|225452250|ref|XP_002271417.1|/0/PREDICTED: glycerol-3-phosphate dehydrogenase [NAD+] [Vitis vinifera]
GSVIVT01024253001	-3.0538	0.899243	K14326|1|5e-49|194|ppp:PHYPADRAFT_73870|regulator of nonsense transcripts 1 [EC:3.6.4.-]	GO:0009526//plastid envelope	GO:0003676//nucleic acid binding;GO:0016462//pyrophosphatase activity;GO:0032559	-	gi|225454589|ref|XP_002264216.1|/0/PREDICTED: DNA-binding protein SMUBP-2 [Vitis vinifera]
GSVIVT01008453001	2.04262	0.86875	K13464|1|0.0|677|vvi:100245759|jasmonate ZIM domain-containing protein	-	-	-	gi|297734341|emb|CBI15588.3|/0/unnamed protein product [Vitis vinifera]
GSVIVT01036885001	6.48738	0.947448	K09843|1|0.0|892|vvi:100264783|(+)-abscisic acid 8'-hydroxylase [EC:1.14.13.93]	-	GO:0016709//oxidoreductase activity, acting on paired donors, with incorporation or reduction of molecular oxygen, NAD(P)H as one donor, and incorporation of one atom of oxygen;GO:0005506//iron ion binding	GO:0006952//defense response;GO:0009687//abscisic acid metabolic process;GO:0009416//response to light stimulus;GO:0003006//developmental process involved in reproduction	gi|359474726|ref|XP_002269405.2|/0/PREDICTED: abscisic acid 8'-hydroxylase 1-like [Vitis vinifera]
GSVIVT01036862001	1.63277	0.829736	K09840|1|0.0|672|vvi:100252859|9-cis-epoxycarotenoid dioxygenase [EC:1.13.11.51]	-	-	-	gi|296085452|emb|CBI29184.3|/0/unnamed protein product [Vitis vinifera]
GSVIVT01024116001	-2.86586	0.898897	-	-	GO:0046872//metal ion binding	-	gi|225427882|ref|XP_002272760.1|/0/PREDICTED: uncharacterized protein LOC100248610 [Vitis vinifera]
GSVIVT01006618001	-2.26909	0.850368	K15639|1|2e-111|401|ath:AT2G26710|cytochrome P450, family 734, subfamily A, polypeptide 1 (PHYB activation tagged suppressor 1) [EC:1.14.-.-];K15638|3|3e-102|371|aly:ARALYDRAFT_494050|cytochrome P450, family 72, subfamily C, polypeptide 1;K10717|5|2e-78|291|aly:ARALYDRAFT_494132|cytokinin trans-hydroxylase	-	GO:0016491//oxidoreductase activity;GO:0005506//iron ion binding	GO:0008152//metabolic process	gi|359496674|ref|XP_003635295.1|/0/PREDICTED: secologanin synthase-like [Vitis vinifera]
GSVIVT01020132001	-2.60903	0.894312	-	GO:0043231//intracellular membrane-bounded organelle	GO:0003676//nucleic acid binding;GO:0046914//transition metal ion binding	GO:0010038//response to metal ion;GO:0009725//response to hormone stimulus;GO:0006970//response to osmotic stress	gi|147793149|emb|CAN73090.1|/1.6979e-139/hypothetical protein VITISV_028723 [Vitis vinifera]
GSVIVT01011599001	-1.4845	0.818339	K01078|1|1e-131|468|ath:AT1G14700|acid phosphatase [EC:3.1.3.2]	GO:0043231//intracellular membrane-bounded organelle	GO:0016791//phosphatase activity	-	gi|225424458|ref|XP_002285160.1|/0/PREDICTED: purple acid phosphatase 3 isoform 1 [Vitis vinifera]
GSVIVT01033307001	-2.1281	0.862868	K06207|1|0.0|1340|vvi:100264026|GTP-binding protein	GO:0043231//intracellular membrane-bounded organelle	GO:0017111//nucleoside-triphosphatase activity;GO:0008135//translation factor activity, nucleic acid binding;GO:0032561//guanyl ribonucleotide binding	GO:0006412//translation;GO:0009207	gi|225441779|ref|XP_002283552.1|/0/PREDICTED: GTP-binding protein TypA/BipA homolog isoform 1 [Vitis vinifera]
GSVIVT01031544001	2.30576	0.800952	-	-	GO:0016787//hydrolase activity	-	gi|297734954|emb|CBI17188.3|/1.87803e-155/unnamed protein product [Vitis vinifera]
GSVIVT01016978001	2.02131	0.800324	-	GO:0043231//intracellular membrane-bounded organelle	GO:0003824//catalytic activity	GO:0008152//metabolic process	gi|225442462|ref|XP_002283654.1|/0/PREDICTED: clavaminate synthase-like protein At3g21360 [Vitis vinifera]
GSVIVT01028074001	3.34913	0.852292	K11275|1|7e-25|112|bdi:100833820|histone H1/5	-	-	-	gi|297743945|emb|CBI36915.3|/8.86284e-101/unnamed protein product [Vitis vinifera]
GSVIVT01027407001	-2.33417	0.862522	K09338|1|6e-55|213|aly:ARALYDRAFT_486694|homeobox-leucine zipper protein	GO:0043231//intracellular membrane-bounded organelle	GO:0003677//DNA binding;GO:0001071//nucleic acid binding transcription factor activity	GO:0006351//transcription, DNA-dependent	gi|359489348|ref|XP_002262950.2|/3.97804e-128/PREDICTED: LOW QUALITY PROTEIN: homeobox-leucine zipper protein ATHB-7-like [Vitis vinifera]
GSVIVT01012636001	5.68252	0.971042	K03146|1|9e-166|581|vvi:100265774|thiamine biosynthetic enzyme	GO:0009941//chloroplast envelope	-	GO:0006772//thiamine metabolic process	gi|302144071|emb|CBI23176.3|/1.0223e-179/unnamed protein product [Vitis vinifera]
GSVIVT01033502001	1.38111	0.819875	K10256|1|7e-114|408|vvi:100252129|omega-6 fatty acid desaturase (delta-12 desaturase) [EC:1.14.19.-]	-	-	-	gi|297739839|emb|CBI30021.3|/2.64083e-175/unnamed protein product [Vitis vinifera]
GSVIVT01008662001	-1.30429	0.804801	K00366|1|9e-06|49.7|ota:Ot10g00930|ferredoxin-nitrite reductase [EC:1.7.7.1]	-	-	-	gi|225456515|ref|XP_002284699.1|/3.84681e-114/PREDICTED: uncharacterized protein LOC100259528 [Vitis vinifera]
GSVIVT01026462001	-1.70352	0.816631	K04733|1|6e-67|254|smo:SELMODRAFT_159261|interleukin-1 receptor-associated kinase 4 [EC:2.7.11.1];K13430|3|2e-63|242|rcu:RCOM_1078760|serine/threonine-protein kinase PBS1 [EC:2.7.11.1]	-	GO:0004672//protein kinase activity	-	gi|296088527|emb|CBI37518.3|/0/unnamed protein product [Vitis vinifera]
GSVIVT01031342001	1.59206	0.813884	-	GO:0044464//cell part	-	-	gi|225450421|ref|XP_002279030.1|/0/PREDICTED: protein notum homolog isoform 1 [Vitis vinifera]
GSVIVT01014067001	-7.12834	0.967236	-	GO:0009526//plastid envelope	-	-	gi|225461846|ref|XP_002285664.1|/3.38873e-103/PREDICTED: trans-2,3-enoyl-CoA reductase [Vitis vinifera]
GSVIVT01031730001	-2.05746	0.865982	K14432|1|6e-70|262|vvi:100243434|ABA responsive element binding factor	GO:0043231//intracellular membrane-bounded organelle	GO:0003677//DNA binding;GO:0001071//nucleic acid binding transcription factor activity;GO:0005515//protein binding	GO:0006351//transcription, DNA-dependent	gi|225428822|ref|XP_002285116.1|/7.20742e-69/PREDICTED: ABSCISIC ACID-INSENSITIVE 5-like protein 6-like isoform 1 [Vitis vinifera]
GSVIVT01009711001	-1.84142	0.810662	-	-	GO:0016741	GO:0006730//one-carbon metabolic process	gi|225458285|ref|XP_002282579.1|/0/PREDICTED: putative S-adenosyl-L-methionine-dependent methyltransferase Mvan_1345-like [Vitis vinifera]
GSVIVT01026956001	-1.63524	0.836073	K12134|1|3e-20|98.2|ath:AT2G46830|circadian clock associated 1;K12133|3|6e-19|94.0|ath:AT1G01060|LATE ELONGATED HYPOCOTYL	GO:0043231//intracellular membrane-bounded organelle	GO:0003676//nucleic acid binding	-	gi|359489639|ref|XP_003633954.1|/3.4442e-173/PREDICTED: transcription factor ASG4-like [Vitis vinifera]
GSVIVT01037901001	-2.1386	0.867885	-	-	-	-	gi|296083106|emb|CBI22510.3|/3.38051e-54/unnamed protein product [Vitis vinifera]
GSVIVT01003132001	-5.27762	0.802011	K13448|1|2e-60|229|vvi:100244152|calcium-binding protein CML	-	GO:0046872//metal ion binding;GO:0016628//oxidoreductase activity, acting on the CH-CH group of donors, NAD or NADP as acceptor	GO:0008152//metabolic process	gi|225437168|ref|XP_002274848.1|/2.4509e-78/PREDICTED: calmodulin-like protein 8 [Vitis vinifera]
GSVIVT01017695001	2.08407	0.810683	-	GO:0009532//plastid stroma	GO:0008252//nucleotidase activity;GO:0043169//cation binding	-	gi|359477339|ref|XP_003631966.1|/0/PREDICTED: cytosolic purine 5'-nucleotidase-like isoform 1 [Vitis vinifera]
GSVIVT01009267001	1.79987	0.845221	-	-	-	-	gi|302142134|emb|CBI19337.3|/0/unnamed protein product [Vitis vinifera]
GSVIVT01033677001	1.27027	0.803914	K09873|1|9e-60|228|aly:ARALYDRAFT_912085|aquaporin TIP	GO:0031224//intrinsic to membrane	-	GO:0006810//transport	gi|297739981|emb|CBI30163.3|/4.2784e-98/unnamed protein product [Vitis vinifera]
GSVIVT01009475001	1.78772	0.831856	-	-	-	-	gi|302142300|emb|CBI19503.3|/1.48258e-127/unnamed protein product [Vitis vinifera]
GSVIVT01033808001	1.99668	0.840225	K00514|1|2e-17|89.0|rcu:RCOM_1428040|zeta-carotene desaturase [EC:1.3.5.6];K01206|2|3e-16|84.7|ath:AT1G67830|alpha-L-fucosidase [EC:3.2.1.51]	-	GO:0016788//hydrolase activity, acting on ester bonds	GO:0044238//primary metabolic process	gi|225440948|ref|XP_002283113.1|/0/PREDICTED: GDSL esterase/lipase At5g03610 [Vitis vinifera]
GSVIVT01007873001	1.48586	0.812846	K14489|1|3e-15|81.3|vvi:100263145|arabidopsis histidine kinase 2/3/4 (cytokinin receptor) [EC:2.7.13.3]	GO:0005911//cell-cell junction;GO:0031224//intrinsic to membrane	GO:0030247//polysaccharide binding	-	gi|225457225|ref|XP_002284112.1|/6.08389e-82/PREDICTED: glucan endo-1,3-beta-glucosidase-like protein 3 [Vitis vinifera]
GSVIVT01021241001	1.90378	0.807569	-	-	-	-	gi|297740525|emb|CBI30707.3|/2.58239e-96/unnamed protein product [Vitis vinifera]
GSVIVT01001159001	-1.74823	0.855147	K02692|1|4e-110|395|vvi:100242600|photosystem I subunit II	GO:0009534//chloroplast thylakoid;GO:0009522//photosystem I	-	GO:0044237//cellular metabolic process	gi|225437028|ref|XP_002278284.1|/4.75401e-109/PREDICTED: photosystem I reaction center subunit II, chloroplastic [Vitis vinifera]
GSVIVT01003728001	2.33176	0.809689	K01285|1|0.0|1006|vvi:100853380|lysosomal Pro-X carboxypeptidase [EC:3.4.16.2]	GO:0031410//cytoplasmic vesicle;GO:0000323//lytic vacuole	GO:0008238//exopeptidase activity	GO:0019538//protein metabolic process	gi|359484787|ref|XP_003633162.1|/0/PREDICTED: lysosomal Pro-X carboxypeptidase-like [Vitis vinifera]
GSVIVT01034361001	4.433	0.859862	K10802|1|1e-29|128|ppp:PHYPADRAFT_106639|high mobility group protein B1	GO:0043231//intracellular membrane-bounded organelle	GO:0003676//nucleic acid binding	-	gi|359484115|ref|XP_002267697.2|/2.9504e-96/PREDICTED: high mobility group B protein 7-like [Vitis vinifera]
GSVIVT01021283001	2.76383	0.855234	K13416|1|5e-67|254|ath:AT4G33430|brassinosteroid insensitive 1-associated receptor kinase 1 [EC:2.7.10.1 2.7.11.1];K13418|3|4e-66|251|rcu:RCOM_0186340|somatic embryogenesis receptor kinase 1 [EC:2.7.10.1 2.7.11.1]	-	GO:0016491//oxidoreductase activity;GO:0004674//protein serine/threonine kinase activity;GO:0000166//nucleotide binding	GO:0008152//metabolic process	gi|359483548|ref|XP_002264642.2|/0/PREDICTED: probable leucine-rich repeat receptor-like serine/threonine-protein kinase At3g14840-like [Vitis vinifera]
GSVIVT01022838001	-2.53409	0.870372	-	-	-	-	gi|298204483|emb|CBI23758.3|/0/unnamed protein product [Vitis vinifera]
GSVIVT01036705001	2.04096	0.846042	-	-	-	-	gi|359494663|ref|XP_002265556.2|/3.38505e-14/PREDICTED: E3 ubiquitin-protein ligase RGLG2-like [Vitis vinifera]
GSVIVT01012309001	4.59702	0.885099	K14686|1|4e-12|69.7|vvi:100258646|solute carrier family 31 (copper transporter), member 1	GO:0031224//intrinsic to membrane	GO:0022890//inorganic cation transmembrane transporter activity	GO:0006825//copper ion transport	gi|296086796|emb|CBI32945.3|/1.3524e-86/unnamed protein product [Vitis vinifera]
GSVIVT01022018001	3.7937	0.920934	K14490|1|1e-80|298|vvi:100250410|histidine-containing phosphotransfer peotein	-	GO:0016628//oxidoreductase activity, acting on the CH-CH group of donors, NAD or NADP as acceptor;GO:0060089	GO:0008152//metabolic process;GO:0007165//signal transduction	gi|225451088|ref|XP_002265307.1|/1.27514e-79/PREDICTED: histidine-containing phosphotransfer protein 1 [Vitis vinifera]
GSVIVT01030268001	2.79661	0.841977	K15923|1|3e-24|110|mtr:MTR_4g127370|alpha-L-fucosidase 2 [EC:3.2.1.51];K07253|2|6e-24|108|ppp:PHYPADRAFT_166244|phenylpyruvate tautomerase [EC:5.3.2.1]	GO:0042579//microbody;GO:0009536//plastid	-	GO:0006952//defense response;GO:0009607//response to biotic stimulus	gi|147818871|emb|CAN73775.1|/3.66497e-60/hypothetical protein VITISV_008785 [Vitis vinifera]
GSVIVT01000469001	-3.59428	0.890138	K14329|1|1e-14|79.3|ath:AT5G61160|agmatine coumaroyltransferase [EC:2.3.1.64 2.3.1.-];K15400|4|6e-06|50.4|ath:AT5G41040|omega-hydroxypalmitate O-feruloyl transferase [EC:2.3.1.188]	-	-	-	gi|296081272|emb|CBI18016.3|/0/unnamed protein product [Vitis vinifera]
GSVIVT01035129001	-1.90016	0.802141	K08243|1|4e-62|236|gmx:547911|6'-deoxychalcone synthase [EC:2.3.1.170];K00011|2|4e-58|222|ath:AT2G37790|aldehyde reductase [EC:1.1.1.21];K00002|4|1e-55|214|osa:4338987|alcohol dehydrogenase (NADP+) [EC:1.1.1.2];K00085|5|4e-30|129|ath:AT2G21260|aldose-6-phosphate reductase (NADPH2) [EC:1.1.1.200]	-	GO:0003824//catalytic activity	GO:0008152//metabolic process	gi|296083348|emb|CBI22984.3|/1.18932e-143/unnamed protein product [Vitis vinifera]
GSVIVT01019663001	-1.71603	0.850714	-	-	-	-	gi|225426574|ref|XP_002279815.1|/1.03776e-156/PREDICTED: uncharacterized protein LOC100256431 [Vitis vinifera]
GSVIVT01035476001	3.65424	0.836397	K00924|1|7e-130|463|ath:AT1G75820|[EC:2.7.1.-];K08286|2|3e-129|461|ath:AT4G28490|protein-serine/threonine kinase [EC:2.7.11.-];K13420|4|4e-120|431|aly:ARALYDRAFT_356368|LRR receptor-like serine/threonine-protein kinase FLS2 [EC:2.7.11.1]	GO:0031224//intrinsic to membrane;GO:0043231//intracellular membrane-bounded organelle;GO:0031410//cytoplasmic vesicle	GO:0004672//protein kinase activity;GO:0016628//oxidoreductase activity, acting on the CH-CH group of donors, NAD or NADP as acceptor;GO:0032559	GO:0006952//defense response;GO:0009886//post-embryonic morphogenesis;GO:0016049//cell growth;GO:0009943//adaxial/abaxial axis specification;GO:0009887//organ morphogenesis;GO:0007155//cell adhesion;GO:0006833//water transport;GO:0050794//regulation of cellular process;GO:0003006//developmental process involved in reproduction;GO:0006464//cellular protein modification process	gi|225429690|ref|XP_002280069.1|/0/PREDICTED: LRR receptor-like serine/threonine-protein kinase ERECTA [Vitis vinifera]
GSVIVT01007639001	-1.51781	0.808694	-	-	-	-	gi|359491142|ref|XP_002280304.2|/2.06104e-109/PREDICTED: protein DEHYDRATION-INDUCED 19 homolog 5-like [Vitis vinifera]
GSVIVT01038688001	1.46309	0.809797	-	-	-	-	gi|225455141|ref|XP_002267630.1|/3.87574e-40/PREDICTED: uncharacterized protein LOC100245217 isoform 3 [Vitis vinifera]
GSVIVT01006634001	1.64673	0.811743	K01626|1|0.0|1045|vvi:100258475|3-deoxy-7-phosphoheptulonate synthase [EC:2.5.1.54]	-	GO:0016765//transferase activity, transferring alkyl or aryl (other than methyl) groups	GO:0008652//cellular amino acid biosynthetic process	gi|359496691|ref|XP_003635302.1|/0/PREDICTED: phospho-2-dehydro-3-deoxyheptonate aldolase 1, chloroplastic [Vitis vinifera]
GSVIVT01026621001	5.93341	0.821497	K09838|1|1e-11|69.7|zma:100285076|zeaxanthin epoxidase [EC:1.14.13.90]	-	GO:0016709//oxidoreductase activity, acting on paired donors, with incorporation or reduction of molecular oxygen, NAD(P)H as one donor, and incorporation of one atom of oxygen	GO:0008152//metabolic process	gi|359477074|ref|XP_002272352.2|/0/PREDICTED: 3-hydroxybenzoate 6-hydroxylase 1-like [Vitis vinifera]
GSVIVT01016467001	-1.39231	0.815657	K12657|1|0.0|1269|vvi:100232881|delta-1-pyrroline-5-carboxylate synthetase [EC:2.7.2.11 1.2.1.41]	GO:0044424//intracellular part	GO:0016620//oxidoreductase activity, acting on the aldehyde or oxo group of donors, NAD or NADP as acceptor;GO:0016774//phosphotransferase activity, carboxyl group as acceptor;GO:0032559	GO:0006560//proline metabolic process;GO:0006796//phosphate-containing compound metabolic process	gi|359486765|ref|XP_002282355.2|/0/PREDICTED: delta-1-pyrroline-5-carboxylate synthase [Vitis vinifera]
GSVIVT01037814001	1.77174	0.855125	-	-	-	-	-
GSVIVT01011585001	4.27141	0.803071	K08243|1|2e-88|324|gmx:547911|6'-deoxychalcone synthase [EC:2.3.1.170];K00011|3|1e-74|278|ath:AT2G37790|aldehyde reductase [EC:1.1.1.21];K00002|4|1e-68|258|osa:4338987|alcohol dehydrogenase (NADP+) [EC:1.1.1.2];K00085|5|4e-52|203|ath:AT2G21260|aldose-6-phosphate reductase (NADPH2) [EC:1.1.1.200]	-	GO:0016747//transferase activity, transferring acyl groups other than amino-acyl groups	GO:0008152//metabolic process	gi|297737569|emb|CBI26770.3|/0/unnamed protein product [Vitis vinifera]
GSVIVT01021192001	3.76821	0.884299	-	GO:0044464//cell part	-	-	gi|297740486|emb|CBI30668.3|/0/unnamed protein product [Vitis vinifera]
GSVIVT01003150001	1.58908	0.833521	K00083|1|2e-157|553|vvi:100257308|cinnamyl-alcohol dehydrogenase [EC:1.1.1.195]	-	GO:0046914//transition metal ion binding;GO:0016491//oxidoreductase activity	GO:0008152//metabolic process	gi|225428916|ref|XP_002285406.1|/2.4942e-156/PREDICTED: probable cinnamyl alcohol dehydrogenase 1 [Vitis vinifera]
GSVIVT01011641001	-2.21328	0.822491	K08241|1|4e-53|207|vvi:100260930|jasmonate O-methyltransferase [EC:2.1.1.141]	-	GO:0016741	GO:0006730//one-carbon metabolic process	gi|225424401|ref|XP_002281378.1|/0/PREDICTED: probable S-adenosylmethionine-dependent methyltransferase At5g37990 [Vitis vinifera]
GSVIVT01015018001	3.0018	0.905061	K00695|1|0.0|1599|vvi:100249279|sucrose synthase [EC:2.4.1.13]	-	GO:0035251//UDP-glucosyltransferase activity	GO:0005984//disaccharide metabolic process	gi|225444613|ref|XP_002275155.1|/0/PREDICTED: sucrose synthase [Vitis vinifera]
GSVIVT01025405001	4.5481	0.933218	-	GO:0009526//plastid envelope	-	-	gi|225435688|ref|XP_002285688.1|/8.88595e-130/PREDICTED: uncharacterized protein LOC100250156 [Vitis vinifera]
GSVIVT01023948001	3.5567	0.823097	K11816|1|7e-17|87.4|pop:POPTR_565856|YUCCA family monooxygenase [EC:1.14.13.-];K00485|3|3e-15|82.0|aly:ARALYDRAFT_888541|dimethylaniline monooxygenase (N-oxide forming) [EC:1.14.13.8]	GO:0005789//endoplasmic reticulum membrane	GO:0016709//oxidoreductase activity, acting on paired donors, with incorporation or reduction of molecular oxygen, NAD(P)H as one donor, and incorporation of one atom of oxygen;GO:0050662//coenzyme binding;GO:0000166//nucleotide binding	GO:0008152//metabolic process	gi|225428145|ref|XP_002281225.1|/0/PREDICTED: probable flavin-containing monooxygenase 1 isoform 1 [Vitis vinifera]
GSVIVT01015030001	1.59329	0.833131	-	-	-	-	gi|297738521|emb|CBI27766.3|/2.77607e-24/unnamed protein product [Vitis vinifera]
GSVIVT01019511001	-3.17583	0.867085	K13426|1|5e-14|77.0|rcu:RCOM_1689100|WRKY transcription factor 29;K13424|4|5e-13|73.6|rcu:RCOM_0664190|WRKY transcription factor 33	-	GO:0003677//DNA binding;GO:0001071//nucleic acid binding transcription factor activity	GO:0010467//gene expression	gi|225426000|ref|XP_002272720.1|/0/PREDICTED: probable WRKY transcription factor 41 [Vitis vinifera]
GSVIVT01030205001	2.31741	0.828503	K14431|1|3e-11|68.9|aly:ARALYDRAFT_311885|transcription factor TGA;K09561|2|3e-06|52.4|vcn:VOLCADRAFT_67840|STIP1 homology and U-box containing protein 1 [EC:6.3.2.19]	-	-	GO:0009743//response to carbohydrate stimulus	gi|297735560|emb|CBI18054.3|/0/unnamed protein product [Vitis vinifera]
GSVIVT01035231001	-3.86451	0.926708	K12134|1|1e-27|124|aly:ARALYDRAFT_904154|circadian clock associated 1;K12133|3|2e-27|123|ath:AT1G01060|LATE ELONGATED HYPOCOTYL	-	-	-	gi|297738146|emb|CBI27347.3|/0/unnamed protein product [Vitis vinifera]
GSVIVT01024455001	2.1665	0.840701	-	-	-	-	gi|297737367|emb|CBI26568.3|/2.71108e-60/unnamed protein product [Vitis vinifera]
GSVIVT01011047001	2.44864	0.831445	K08145|1|1e-112|405|pop:POPTR_764739|MFS transporter, SP family, solute carrier family 2 (facilitated glucose transporter), member 8	GO:0031090//organelle membrane;GO:0031224//intrinsic to membrane;GO:0009536//plastid	GO:0022891//substrate-specific transmembrane transporter activity;GO:0016628//oxidoreductase activity, acting on the CH-CH group of donors, NAD or NADP as acceptor	GO:0008152//metabolic process;GO:0071702	gi|359479783|ref|XP_002270927.2|/0/PREDICTED: sugar transporter ERD6-like 7-like [Vitis vinifera]
GSVIVT01037652001	1.75453	0.818642	K13412|1|0.0|1036|vvi:100243573|calcium-dependent protein kinase [EC:2.7.11.1]	-	GO:0046872//metal ion binding;GO:0004674//protein serine/threonine kinase activity;GO:0032559	GO:0006464//cellular protein modification process	gi|225460973|ref|XP_002278179.1|/0/PREDICTED: calcium-dependent protein kinase 9-like [Vitis vinifera]
GSVIVT01009943001	2.11506	0.868815	-	-	-	-	gi|225457921|ref|XP_002272757.1|/0/PREDICTED: extended synaptotagmin-2 isoform 1 [Vitis vinifera]
GSVIVT01015217001	-4.25637	0.920804	-	GO:0009536//plastid	GO:0016741	GO:0006730//one-carbon metabolic process	gi|225444946|ref|XP_002282381.1|/2.64888e-168/PREDICTED: uncharacterized protein LOC100268021 [Vitis vinifera]
GSVIVT01000148001	1.98369	0.845177	-	GO:0009536//plastid	GO:0003676//nucleic acid binding;GO:0016891//endoribonuclease activity, producing 5'-phosphomonoesters	GO:0010467//gene expression	gi|225438954|ref|XP_002284222.1|/0/PREDICTED: uncharacterized protein LOC100254381 [Vitis vinifera]
GSVIVT01016698001	4.9143	0.895004	K14488|1|5e-08|56.6|ppp:PHYPADRAFT_26859|SAUR family protein	-	-	-	gi|147782667|emb|CAN61793.1|/4.61132e-97/hypothetical protein VITISV_015798 [Vitis vinifera]
GSVIVT01010631001	5.43064	0.804477	K09286|1|5e-21|98.6|ath:AT4G25480|EREBP-like factor	GO:0043231//intracellular membrane-bounded organelle	GO:0003676//nucleic acid binding;GO:0001071//nucleic acid binding transcription factor activity	GO:0006351//transcription, DNA-dependent	gi|297741116|emb|CBI31847.3|/3.2302e-89/unnamed protein product [Vitis vinifera]
GSVIVT01019031001	-1.76333	0.836548	-	-	-	-	gi|297735215|emb|CBI17577.3|/6.26639e-143/unnamed protein product [Vitis vinifera]
GSVIVT01031731001	-2.1211	0.866587	K14432|1|3e-150|495|vvi:100243434|ABA responsive element binding factor	-	GO:0005488//binding	-	gi|359475189|ref|XP_003631614.1|/3.36452e-149/PREDICTED: ABSCISIC ACID-INSENSITIVE 5-like protein 6-like isoform 3 [Vitis vinifera]
GSVIVT01009258001	1.95073	0.865809	K07374|1|0.0|687|gmx:100779027|tubulin alpha	GO:0032991//macromolecular complex;GO:0015630//microtubule cytoskeleton	GO:0017111//nucleoside-triphosphatase activity;GO:0032561//guanyl ribonucleotide binding	GO:0043623//cellular protein complex assembly;GO:0009207;GO:0007017//microtubule-based process	gi|302142127|emb|CBI19330.3|/0/unnamed protein product [Vitis vinifera]
GSVIVT01025651001	-2.12188	0.873421	-	-	-	-	gi|359481353|ref|XP_003632609.1|/2.23069e-136/PREDICTED: uncharacterized protein LOC100854914 [Vitis vinifera]
GSVIVT01007659001	2.6336	0.867604	-	-	-	-	gi|297733713|emb|CBI14960.3|/1.14616e-48/unnamed protein product [Vitis vinifera]
GSVIVT01019407001	-2.95677	0.898292	K04079|1|1e-176|519|vvi:100265661|molecular chaperone HtpG	GO:0044424//intracellular part	GO:0005515//protein binding;GO:0032559	GO:0044267//cellular protein metabolic process;GO:0050896//response to stimulus	gi|302760227|ref|XP_002963536.1|/0/hypothetical protein SELMODRAFT_230177 [Selaginella moellendorffii]
GSVIVT01011171001	-1.62958	0.844074	K10257|1|0.0|867|vvi:100247097|omega-3 fatty acid desaturase (delta-15 desaturase) [EC:1.14.19.-]	GO:0009941//chloroplast envelope	GO:0016705//oxidoreductase activity, acting on paired donors, with incorporation or reduction of molecular oxygen	GO:0006631//fatty acid metabolic process	gi|296083167|emb|CBI22803.3|/0/unnamed protein product [Vitis vinifera]
GSVIVT01011343001	-2.12739	0.868685	-	-	-	-	gi|225463848|ref|XP_002265262.1|/2.57542e-158/PREDICTED: uncharacterized protein LOC100244941 [Vitis vinifera]
GSVIVT01020090001	-1.51164	0.808218	K09510|1|2e-90|330|vvi:100246709|DnaJ homolog subfamily B member 4	-	GO:0005488//binding	-	gi|296086444|emb|CBI32033.3|/8.66329e-177/unnamed protein product [Vitis vinifera]
GSVIVT01028974001	-2.40657	0.861635	-	-	GO:0043169//cation binding	GO:0006812//cation transport	gi|225470181|ref|XP_002268244.1|/2.8416e-23/PREDICTED: uncharacterized protein LOC100250657 [Vitis vinifera]
GSVIVT01035671001	-2.48727	0.835013	K13118|1|6e-15|80.9|cre:CHLREDRAFT_17930|protein DGCR14;K06694|3|1e-14|79.7|rcu:RCOM_1621740|26S proteasome non-ATPase regulatory subunit 10	-	-	-	gi|296081888|emb|CBI20893.3|/0/unnamed protein product [Vitis vinifera]
GSVIVT01030213001	-1.99824	0.856466	K00924|1|2e-99|361|osa:4342410|[EC:2.7.1.-];K07198|3|3e-44|178|aly:ARALYDRAFT_484683|5'-AMP-activated protein kinase, catalytic alpha subunit [EC:2.7.11.11]	-	GO:0004672//protein kinase activity;GO:0000166//nucleotide binding	GO:0009987//cellular process	gi|297735566|emb|CBI18060.3|/0/unnamed protein product [Vitis vinifera]
GSVIVT01009931001	1.36241	0.804477	K09487|1|0.0|1330|vvi:100267648|heat shock protein 90kDa beta	GO:0044432//endoplasmic reticulum part;GO:0031410//cytoplasmic vesicle	GO:0005515//protein binding;GO:0032559	GO:0050896//response to stimulus;GO:0044267//cellular protein metabolic process	gi|225457939|ref|XP_002273785.1|/0/PREDICTED: endoplasmin homolog [Vitis vinifera]
GSVIVT01008670001	-4.09288	0.902552	K00030|1|2e-155|547|vvi:100242228|isocitrate dehydrogenase (NAD+) [EC:1.1.1.41];K09588|2|5e-73|273|pop:POPTR_656234|cytochrome P450, family 90, subfamily A, polypeptide 1 [EC:1.14.-.-]	-	GO:0016709//oxidoreductase activity, acting on paired donors, with incorporation or reduction of molecular oxygen, NAD(P)H as one donor, and incorporation of one atom of oxygen;GO:0005506//iron ion binding	GO:0008152//metabolic process	gi|302141660|emb|CBI18863.3|/0/unnamed protein product [Vitis vinifera]
GSVIVT01013275001	2.11179	0.811592	K00924|1|4e-130|463|aly:ARALYDRAFT_494273|[EC:2.7.1.-];K05658|5|2e-94|345|vvi:100262734|ATP-binding cassette, subfamily B (MDR/TAP), member 1	-	GO:0004672//protein kinase activity;GO:0032559	GO:0006464//cellular protein modification process	gi|225427370|ref|XP_002282904.1|/0/PREDICTED: probable receptor-like protein kinase At5g47070 [Vitis vinifera]
GSVIVT01012158001	1.42714	0.802747	K15631|1|3e-28|124|sbi:SORBI_10g026910|molybdenum cofactor sulfurtransferase [EC:2.8.1.9]	GO:0009536//plastid	GO:0046914//transition metal ion binding;GO:0003824//catalytic activity;GO:0048037//cofactor binding	-	gi|225423585|ref|XP_002273557.1|/1.06676e-173/PREDICTED: MOSC domain-containing protein 1, mitochondrial [Vitis vinifera]
GSVIVT01025005001	2.62965	0.863516	K11254|1|4e-20|95.5|mtr:MTR_2g096100|histone H4	GO:0000785//chromatin;GO:0031090//organelle membrane;GO:0009536//plastid	GO:0003676//nucleic acid binding	GO:0034728//nucleosome organization	gi|470116831|ref|XP_004294578.1|/4.82515e-19/PREDICTED: histone H4-like [Fragaria vesca subsp. vesca]
GSVIVT01020141001	2.27244	0.8734	K13648|1|7e-19|93.6|ath:AT2G20810|alpha-1,4-galacturonosyltransferase [EC:2.4.1.43]	GO:0043231//intracellular membrane-bounded organelle	GO:0008194//UDP-glycosyltransferase activity	-	gi|296086483|emb|CBI32072.3|/0/unnamed protein product [Vitis vinifera]
GSVIVT01020388001	-4.07255	0.849221	-	-	GO:0003676//nucleic acid binding	-	gi|359494559|ref|XP_002265838.2|/2.47805e-167/PREDICTED: NAC domain-containing protein 42-like [Vitis vinifera]
GSVIVT01025087001	2.23271	0.864749	K12129|1|5e-63|239|vvi:100246836|pseudo-response regulator 7	-	-	-	gi|225435163|ref|XP_002281776.1|/6.73689e-62/PREDICTED: two-component response regulator-like PRR73-like [Vitis vinifera]
GSVIVT01035689001	4.47844	0.87407	K11090|1|1e-69|262|vvi:100250699|lupus La protein	GO:0032991//macromolecular complex;GO:0043231//intracellular membrane-bounded organelle	GO:0003676//nucleic acid binding	GO:0010467//gene expression	gi|296081903|emb|CBI20908.3|/2.34686e-144/unnamed protein product [Vitis vinifera]
GSVIVT01038270001	-1.71309	0.801449	K08472|1|1e-176|618|aly:ARALYDRAFT_663667|mlo protein	GO:0031224//intrinsic to membrane	-	GO:0009987//cellular process	gi|166012596|gb|ABY77906.1|/0/mildew resistance locus o 15 [Vitis vinifera]
GSVIVT01015204001	-1.41965	0.821951	-	-	GO:0046914//transition metal ion binding;GO:0003677//DNA binding;GO:0001071//nucleic acid binding transcription factor activity	GO:0006351//transcription, DNA-dependent	gi|225444922|ref|XP_002282173.1|/4.39815e-133/PREDICTED: uncharacterized protein LOC100261004 [Vitis vinifera]
GSVIVT01030258001	-1.8878	0.805277	K13424|1|1e-144|511|vvi:100243352|WRKY transcription factor 33	-	-	-	gi|225439574|ref|XP_002264974.1|/0/PREDICTED: probable WRKY transcription factor 33-like [Vitis vinifera]
GSVIVT01011815001	1.81008	0.818707	K00924|1|5e-47|187|ath:AT1G24650|[EC:2.7.1.-];K04733|3|1e-45|183|aly:ARALYDRAFT_916421|interleukin-1 receptor-associated kinase 4 [EC:2.7.11.1];K13418|4|2e-45|182|vvi:100247683|somatic embryogenesis receptor kinase 1 [EC:2.7.10.1 2.7.11.1]	GO:0043231//intracellular membrane-bounded organelle;GO:0031410//cytoplasmic vesicle	GO:0004672//protein kinase activity;GO:0032559	GO:0006464//cellular protein modification process	gi|255570697|ref|XP_002526303.1|/0/kinase, putative [Ricinus communis]
GSVIVT01016580001	-1.80234	0.847967	-	-	GO:0031406//carboxylic acid binding	-	gi|225449577|ref|XP_002283917.1|/0/PREDICTED: uncharacterized protein LOC100256399 [Vitis vinifera]
GSVIVT01027594001	-2.21717	0.842344	-	-	-	GO:0006810//transport	gi|225453877|ref|XP_002278630.1|/0/PREDICTED: SPX domain-containing membrane protein At4g22990 [Vitis vinifera]
GSVIVT01025502001	-3.05395	0.865506	K14491|1|8e-13|71.6|ppp:PHYPADRAFT_152341|two-component response regulator ARR-B family	GO:0043231//intracellular membrane-bounded organelle	-	-	gi|297746509|emb|CBI16565.3|/6.24477e-90/unnamed protein product [Vitis vinifera]
GSVIVT01001082001	-3.55482	0.898248	-	GO:0031410//cytoplasmic vesicle;GO:0031090//organelle membrane;GO:0043231//intracellular membrane-bounded organelle	-	-	gi|225425256|ref|XP_002269974.1|/3.30847e-116/PREDICTED: heme-binding protein 2-like [Vitis vinifera]
GSVIVT01011068001	-2.10066	0.821929	K10767|1|4e-25|115|sbi:SORBI_06g033940|alkylated DNA repair protein alkB homolog 5 [EC:1.14.11.-];K10770|3|8e-09|60.8|ota:Ot13g02430|alkylated DNA repair protein alkB homolog 8 [EC:1.14.11.- 2.1.1.229]	-	-	GO:0009628//response to abiotic stimulus	gi|225436894|ref|XP_002271361.1|/0/PREDICTED: uncharacterized protein LOC100256341 [Vitis vinifera]
GSVIVT01008993001	-1.71445	0.851427	-	-	-	-	gi|359492831|ref|XP_002285807.2|/6.06282e-87/PREDICTED: uncharacterized protein LOC100252409 [Vitis vinifera]
GSVIVT01025488001	-1.74044	0.850519	-	GO:0009526//plastid envelope;GO:0009532//plastid stroma;GO:0009534//chloroplast thylakoid	-	GO:0006950//response to stress	gi|225435790|ref|XP_002285744.1|/1.49452e-156/PREDICTED: uncharacterized protein LOC100241562 [Vitis vinifera]
GSVIVT01003423001	-1.84032	0.83205	K11253|1|1e-69|260|mtr:MTR_4g097170|histone H3	GO:0000785//chromatin;GO:0043231//intracellular membrane-bounded organelle	GO:0003676//nucleic acid binding	GO:0034728//nucleosome organization	gi|15236103|ref|NP_195713.1|/1.80474e-68/histone H3 [Arabidopsis thaliana]
GSVIVT01013755001	3.87611	0.914317	-	-	GO:0016491//oxidoreductase activity	GO:0010038//response to metal ion;GO:0009860//pollen tube growth	gi|297739052|emb|CBI28541.3|/0/unnamed protein product [Vitis vinifera]
GSVIVT01030977001	-2.26264	0.813343	K09291|1|1e-10|45.4|smo:SELMODRAFT_444132|nucleoprotein TPR;K10405|3|2e-07|56.6|cme:CMR497C|kinesin family member C1;K06674|4|2e-07|56.2|pop:POPTR_757320|structural maintenance of chromosome 2;K10696|5|5e-07|39.3|aly:ARALYDRAFT_314752|E3 ubiquitin-protein ligase BRE1 [EC:6.3.2.19]	-	-	-	gi|296087244|emb|CBI33618.3|/0/unnamed protein product [Vitis vinifera]
GSVIVT01030651001	-2.09108	0.81263	-	-	-	-	gi|225447396|ref|XP_002281293.1|/1.28946e-47/PREDICTED: uncharacterized protein LOC100253416 [Vitis vinifera]
GSVIVT01030687001	-1.95028	0.84202	-	-	GO:0003824//catalytic activity	-	gi|359488225|ref|XP_002263589.2|/1.93808e-102/PREDICTED: nudix hydrolase 18, mitochondrial-like [Vitis vinifera]
GSVIVT01037285001	-1.71832	0.843123	-	-	GO:0016787//hydrolase activity	-	gi|225436652|ref|XP_002280404.1|/3.34855e-146/PREDICTED: uncharacterized protein LOC100267192 [Vitis vinifera]
GSVIVT01012221001	-2.65223	0.867539	-	-	-	-	gi|297738090|emb|CBI27291.3|/0/unnamed protein product [Vitis vinifera]
GSVIVT01021252001	1.99579	0.832007	K13425|1|1e-27|122|vvi:100256849|WRKY transcription factor 22	-	GO:0003677//DNA binding;GO:0001071//nucleic acid binding transcription factor activity	GO:0010467//gene expression	gi|225443744|ref|XP_002269267.1|/8.43386e-129/PREDICTED: probable WRKY transcription factor 65 [Vitis vinifera]
GSVIVT01032155001	2.19745	0.802876	K00559|1|0.0|731|vvi:100263590|sterol 24-C-methyltransferase [EC:2.1.1.41]	GO:0043231//intracellular membrane-bounded organelle	GO:0008169//C-methyltransferase activity	GO:0006694//steroid biosynthetic process;GO:0003006//developmental process involved in reproduction;GO:0006730//one-carbon metabolic process	gi|297736296|emb|CBI24934.3|/0/unnamed protein product [Vitis vinifera]
GSVIVT01014587001	1.50084	0.807829	K03671|1|4e-22|102|ppp:PHYPADRAFT_185663|thioredoxin 1	GO:0044444//cytoplasmic part	GO:0015036//disulfide oxidoreductase activity	GO:0006457//protein folding;GO:0006464//cellular protein modification process;GO:0018904;GO:0019725//cellular homeostasis	gi|452114374|gb|AGG09344.1|/1.27383e-65/thioredoxin h-type [Vitis vinifera]
GSVIVT01030166001	-1.77977	0.842928	K08818|1|6e-08|57.8|aly:ARALYDRAFT_919626|cell division cycle 2-like [EC:2.7.11.22];K02202|2|3e-07|55.5|gmx:100813673|cyclin-dependent kinase 7 [EC:2.7.11.22 2.7.11.23];K08286|3|3e-07|55.5|cme:CML232C|protein-serine/threonine kinase [EC:2.7.11.-];K04368|4|4e-07|55.1|aly:ARALYDRAFT_491777|mitogen-activated protein kinase kinase 1 [EC:2.7.12.2]	GO:0009536//plastid	GO:0004672//protein kinase activity;GO:0032559	GO:0006464//cellular protein modification process;GO:0042548//regulation of photosynthesis, light reaction	gi|225439719|ref|XP_002273138.1|/0/PREDICTED: serine/threonine-protein kinase STN8, chloroplastic [Vitis vinifera]
GSVIVT01020616001	3.58589	0.905839	-	GO:0031225//anchored to membrane;GO:0005618//cell wall	-	-	gi|225446471|ref|XP_002277788.1|/7.79261e-93/PREDICTED: fasciclin-like arabinogalactan protein 9 isoform 1 [Vitis vinifera]
GSVIVT01011947001	1.84922	0.855298	K09287|1|2e-76|256|vvi:100262843|RAV-like factor	-	-	GO:0006351//transcription, DNA-dependent	gi|297737861|emb|CBI27062.3|/2.3975e-110/unnamed protein product [Vitis vinifera]
GSVIVT01035515001	5.51831	0.894702	-	-	-	-	-
GSVIVT01006035001	-2.02936	0.868599	K02355|1|0.0|951|rcu:RCOM_1679710|elongation factor G	GO:0009532//plastid stroma;GO:0009526//plastid envelope;GO:0005576//extracellular region	GO:0008135//translation factor activity, nucleic acid binding;GO:0032561//guanyl ribonucleotide binding;GO:0032559	GO:0044238//primary metabolic process;GO:0009657//plastid organization;GO:0007275//multicellular organismal development;GO:0044237//cellular metabolic process	gi|296085091|emb|CBI28506.3|/0/unnamed protein product [Vitis vinifera]
GSVIVT01033335001	4.7747	0.876622	-	-	-	-	gi|297739702|emb|CBI29884.3|/3.06166e-111/unnamed protein product [Vitis vinifera]
GSVIVT01010790001	1.59091	0.833651	K00847|1|0.0|652|vvi:100245852|fructokinase [EC:2.7.1.4]	-	GO:0004396//hexokinase activity;GO:0032559	GO:0019321//pentose metabolic process;GO:0006796//phosphate-containing compound metabolic process	gi|225433918|ref|XP_002268097.1|/0/PREDICTED: fructokinase-2 [Vitis vinifera]
GSVIVT01017786001	2.69662	0.867885	K03676|1|9e-27|116|bdi:100821530|glutaredoxin 3	-	GO:0015036//disulfide oxidoreductase activity	GO:0019725//cellular homeostasis	gi|225432360|ref|XP_002275384.1|/3.37795e-54/PREDICTED: monothiol glutaredoxin-S2 [Vitis vinifera]
GSVIVT01008169001	2.71517	0.845502	K13496|1|9e-26|116|ath:AT2G36800|UDP-glucosyl transferase 73C [EC:2.4.1.-];K13691|4|7e-25|113|pop:POPTR_582116|pathogen-inducible salicylic acid glucosyltransferase [EC:2.4.1.-]	-	GO:0035251//UDP-glucosyltransferase activity	-	gi|297734116|emb|CBI15363.3|/2.5789e-109/unnamed protein product [Vitis vinifera]
GSVIVT01020215001	2.30123	0.861808	K16055|1|0.0|754|vvi:100246842|trehalose 6-phosphate synthase/phosphatase [EC:2.4.1.15 3.1.3.12]	-	GO:0010333//terpene synthase activity;GO:0035251//UDP-glucosyltransferase activity;GO:0019203//carbohydrate phosphatase activity	GO:0016098//monoterpenoid metabolic process;GO:0009719;GO:0005991//trehalose metabolic process;GO:0006950//response to stress;GO:0051707//response to other organism	gi|296086536|emb|CBI32125.3|/0/unnamed protein product [Vitis vinifera]
GSVIVT01036471001	-1.65582	0.831401	-	-	-	-	gi|298204396|emb|CBI16876.3|/6.2283e-42/unnamed protein product [Vitis vinifera]
GSVIVT01031445001	2.09517	0.805147	K09646|1|0.0|884|vvi:100267109|serine carboxypeptidase 1 [EC:3.4.16.-]	GO:0044464//cell part	GO:0004180//carboxypeptidase activity	GO:0019538//protein metabolic process	gi|225436420|ref|XP_002273519.1|/0/PREDICTED: serine carboxypeptidase-like 51-like [Vitis vinifera]
GSVIVT01020071001	1.72885	0.843361	-	GO:0031090//organelle membrane;GO:0009536//plastid	GO:0019901//protein kinase binding	-	gi|296086429|emb|CBI32018.3|/0/unnamed protein product [Vitis vinifera]
GSVIVT01029173001	8.3503	0.976298	K08235|1|1e-153|540|vvi:100246166|xyloglucan:xyloglucosyl transferase [EC:2.4.1.207];K14504|3|3e-144|509|vvi:100256520|xyloglucan:xyloglucosyl transferase TCH4 [EC:2.4.1.207]	GO:0005576//extracellular region;GO:0030312//external encapsulating structure	GO:0016798//hydrolase activity, acting on glycosyl bonds;GO:0016758//transferase activity, transferring hexosyl groups	GO:0044042//glucan metabolic process	gi|359484996|ref|XP_002273742.2|/4.93468e-162/PREDICTED: probable xyloglucan endotransglucosylase/hydrolase protein 23-like [Vitis vinifera]
GSVIVT01035695001	6.48874	0.964252	-	-	-	-	gi|225430055|ref|XP_002284380.1|/1.12015e-127/PREDICTED: BURP domain-containing protein 3-like [Vitis vinifera]
GSVIVT01023236001	-4.08363	0.904087	-	-	GO:0004672//protein kinase activity	-	gi|297739516|emb|CBI29698.3|/0/unnamed protein product [Vitis vinifera]
GSVIVT01007614001	-1.83282	0.854715	K00517|1|2e-72|271|aly:ARALYDRAFT_682995|[EC:1.14.-.-]	-	-	-	gi|297733675|emb|CBI14922.3|/0/unnamed protein product [Vitis vinifera]
GSVIVT01013694001	6.6538	0.822405	K00423|1|3e-61|235|rcu:RCOM_0657480|L-ascorbate oxidase [EC:1.10.3.3]	GO:0005576//extracellular region	GO:0046914//transition metal ion binding;GO:0016682//oxidoreductase activity, acting on diphenols and related substances as donors, oxygen as acceptor	GO:0009808//lignin metabolic process	gi|225463097|ref|XP_002263871.1|/0/PREDICTED: putative laccase-9 [Vitis vinifera]
GSVIVT01027555001	5.0139	0.802206	K00517|1|2e-98|357|osa:4348172|[EC:1.14.-.-];K05280|2|2e-84|311|mtr:MTR_3g025230|flavonoid 3'-monooxygenase [EC:1.14.13.21]	-	GO:0016491//oxidoreductase activity;GO:0005506//iron ion binding	-	gi|296089102|emb|CBI38805.3|/0/unnamed protein product [Vitis vinifera]
GSVIVT01016996001	1.50239	0.814252	-	-	GO:0003676//nucleic acid binding;GO:0046872//metal ion binding	GO:0009725//response to hormone stimulus	gi|225442479|ref|XP_002283785.1|/3.34254e-148/PREDICTED: uncharacterized protein LOC100241227 [Vitis vinifera]
GSVIVT01037740001	1.70954	0.854909	-	-	-	-	gi|359494088|ref|XP_002276878.2|/1.18298e-15/PREDICTED: uncharacterized protein LOC100260620 isoform 1 [Vitis vinifera]
GSVIVT01019965001	-2.2275	0.874913	-	GO:0044464//cell part	-	-	gi|225425652|ref|XP_002272879.1|/6.46834e-137/PREDICTED: expansin-A1 [Vitis vinifera]
GSVIVT01013365001	3.58051	0.904131	-	-	-	GO:0009987//cellular process	gi|297745547|emb|CBI40712.3|/0/unnamed protein product [Vitis vinifera]
GSVIVT01020679001	1.45295	0.815549	-	-	-	-	gi|225446561|ref|XP_002279857.1|/4.15508e-30/PREDICTED: uncharacterized protein LOC100255693 [Vitis vinifera]
GSVIVT01018903001	-1.85982	0.830644	K08241|1|1e-91|334|rcu:RCOM_1595240|jasmonate O-methyltransferase [EC:2.1.1.141]	-	GO:0008757//S-adenosylmethionine-dependent methyltransferase activity	GO:0006730//one-carbon metabolic process	gi|297735106|emb|CBI17468.3|/5.85311e-177/unnamed protein product [Vitis vinifera]
GSVIVT01000230001	4.56979	0.911246	-	-	-	GO:0006952//defense response;GO:0001906//cell killing	gi|359480892|ref|XP_002272913.2|/1.407e-30/PREDICTED: defensin-like protein 6-like [Vitis vinifera]
GSVIVT01010306001	-1.46701	0.823465	-	GO:0009526//plastid envelope	GO:0070011//peptidase activity, acting on L-amino acid peptides	-	gi|359473697|ref|XP_002272215.2|/8.26211e-125/PREDICTED: uncharacterized protein LOC100256260 [Vitis vinifera]
GSVIVT01014639001	-2.38236	0.866285	K00640|1|6e-54|209|vvi:100246391|serine O-acetyltransferase [EC:2.3.1.30]	GO:0043231//intracellular membrane-bounded organelle	GO:0046914//transition metal ion binding;GO:0016412//serine O-acyltransferase activity	GO:0000097//sulfur amino acid biosynthetic process	gi|296089887|emb|CBI39706.3|/5.23989e-156/unnamed protein product [Vitis vinifera]
GSVIVT01013190001	2.07004	0.847059	-	-	GO:0003676//nucleic acid binding	GO:0012502//induction of programmed cell death	gi|297742122|emb|CBI33909.3|/1.3995e-92/unnamed protein product [Vitis vinifera]
GSVIVT01012733001	-1.77232	0.849719	-	-	-	-	gi|302144143|emb|CBI23248.3|/2.75607e-57/unnamed protein product [Vitis vinifera]
GSVIVT01023979001	-2.58735	0.89202	K02886|1|6e-15|77.0|vvi:4025024|large subunit ribosomal protein L2	GO:0030529//ribonucleoprotein complex;GO:0009536//plastid	GO:0003676//nucleic acid binding;GO:0003824//catalytic activity;GO:0005198//structural molecule activity	GO:0010467//gene expression	gi|340807271|gb|AEK71851.1|/1.00802e-13/ribosomal protein L2 [Cissus rotundifolia]
GSVIVT01034195001	-1.80278	0.852487	K03283|1|5e-86|315|vvi:100259551|heat shock 70kDa protein 1/8	-	GO:0016491//oxidoreductase activity;GO:0000166//nucleotide binding	-	gi|297740392|emb|CBI30574.3|/6.46677e-90/unnamed protein product [Vitis vinifera]
GSVIVT01014443001	-3.33202	0.892993	K10418|1|4e-15|78.6|ota:Ot01g00570|dynein light chain LC8-type	GO:0015630//microtubule cytoskeleton	GO:0003774//motor activity	GO:0009987//cellular process	gi|225461306|ref|XP_002281713.1|/9.63508e-48/PREDICTED: dynein light chain LC6, flagellar outer arm [Vitis vinifera]
GSVIVT01026248001	-1.53257	0.811116	-	-	-	-	gi|296085326|emb|CBI29058.3|/4.50278e-141/unnamed protein product [Vitis vinifera]
GSVIVT01009390001	1.991	0.830104	K00517|1|6e-119|426|ath:AT4G37340|[EC:1.14.-.-]	-	GO:0004497//monooxygenase activity;GO:0005506//iron ion binding	-	gi|302142236|emb|CBI19439.3|/0/unnamed protein product [Vitis vinifera]
GSVIVT01033097001	-1.67853	0.812067	-	GO:0009536//plastid	GO:0004175//endopeptidase activity	GO:0019538//protein metabolic process	gi|225451439|ref|XP_002273907.1|/0/PREDICTED: uncharacterized protein LOC100263426 [Vitis vinifera]
GSVIVT01011005001	5.35896	0.90558	K11816|1|3e-87|320|mtr:MTR_3g109520|YUCCA family monooxygenase [EC:1.14.13.-]	-	GO:0004497//monooxygenase activity;GO:0050662//coenzyme binding	-	gi|296086634|emb|CBI32269.3|/0/unnamed protein product [Vitis vinifera]
GSVIVT01037703001	-1.43227	0.825908	K14190|1|0.0|845|vvi:100253859|GDP-L-galactose phosphorylase [EC:2.7.7.69]	-	-	-	gi|297737479|emb|CBI26680.3|/0/unnamed protein product [Vitis vinifera]
GSVIVT01021092001	2.60932	0.894377	-	-	-	GO:0009746;GO:0034285	gi|225443630|ref|XP_002279836.1|/4.19785e-52/PREDICTED: auxin-repressed 12.5 kDa protein isoform 1 [Vitis vinifera]
GSVIVT01030048001	2.13536	0.846951	-	-	GO:0003676//nucleic acid binding	-	gi|296084999|emb|CBI28414.3|/0/unnamed protein product [Vitis vinifera]
GSVIVT01015048001	-1.62276	0.810208	-	GO:0043231//intracellular membrane-bounded organelle	-	GO:0006743//ubiquinone metabolic process	gi|225444671|ref|XP_002277343.1|/6.58756e-153/PREDICTED: ubiquinone biosynthesis protein COQ9-B, mitochondrial [Vitis vinifera]
GSVIVT01024057001	1.48412	0.827292	K03686|1|1e-12|69.7|zma:100191825|molecular chaperone DnaJ;K09527|4|5e-11|64.7|cre:CHLREDRAFT_146571|DnaJ homolog subfamily C member 7	-	GO:0005515//protein binding	GO:0044267//cellular protein metabolic process	gi|297744638|emb|CBI37900.3|/8.54844e-74/unnamed protein product [Vitis vinifera]
GSVIVT01016712001	1.98453	0.803676	K11517|1|0.0|660|vvi:100253231|(S)-2-hydroxy-acid oxidase [EC:1.1.3.15]	GO:0042579//microbody	GO:0003973//(S)-2-hydroxy-acid oxidase activity;GO:0000166//nucleotide binding	GO:0008152//metabolic process	gi|225442052|ref|XP_002270074.1|/0/PREDICTED: peroxisomal (S)-2-hydroxy-acid oxidase GLO4 [Vitis vinifera]
GSVIVT01011072001	-1.93437	0.817561	K01915|1|0.0|837|vvi:100242605|glutamine synthetase [EC:6.3.1.2]	GO:0009536//plastid	GO:0016211;GO:0032559	GO:0006541//glutamine metabolic process;GO:0071941	gi|225436900|ref|XP_002274139.1|/0/PREDICTED: glutamine synthetase leaf isozyme, chloroplastic [Vitis vinifera]
GSVIVT01036007001	-2.18519	0.870999	K13071|1|3e-46|185|ppp:PHYPADRAFT_134389|pheophorbide a oxygenase [EC:1.14.12.20]	GO:0009526//plastid envelope	GO:0016709//oxidoreductase activity, acting on paired donors, with incorporation or reduction of molecular oxygen, NAD(P)H as one donor, and incorporation of one atom of oxygen;GO:0016703;GO:0043169//cation binding;GO:0051536//iron-sulfur cluster binding	GO:0006605//protein targeting;GO:0008152//metabolic process	gi|359475902|ref|XP_002283433.2|/0/PREDICTED: protein TIC 55, chloroplastic-like [Vitis vinifera]
GSVIVT01013771001	-2.50842	0.885792	K01184|1|1e-142|504|rcu:RCOM_1063390|polygalacturonase [EC:3.2.1.15]	-	GO:0004553//hydrolase activity, hydrolyzing O-glycosyl compounds	GO:0044238//primary metabolic process;GO:0045229//external encapsulating structure organization	gi|225425577|ref|XP_002266600.1|/0/PREDICTED: polygalacturonase At1g48100 [Vitis vinifera]
GSVIVT01018934001	-1.89512	0.808218	K13535|1|3e-09|61.6|cre:CHLREDRAFT_121979|cardiolipin-specific phospholipase [EC:3.1.1.-]	GO:0009536//plastid	GO:0004091//carboxylesterase activity	-	gi|359476685|ref|XP_002266355.2|/0/PREDICTED: uncharacterized hydrolase yugF-like [Vitis vinifera]
GSVIVT01019905001	-2.00203	0.834105	-	-	-	-	gi|297742639|emb|CBI34788.3|/9.98072e-59/unnamed protein product [Vitis vinifera]
GSVIVT01031820001	6.92281	0.916025	K06892|1|7e-109|392|ath:AT3G19010|;K00475|4|2e-47|188|gmx:732548|naringenin 3-dioxygenase [EC:1.14.11.9]	-	GO:0016701//oxidoreductase activity, acting on single donors with incorporation of molecular oxygen;GO:0046914//transition metal ion binding	GO:0008152//metabolic process	gi|225428679|ref|XP_002284940.1|/0/PREDICTED: naringenin,2-oxoglutarate 3-dioxygenase [Vitis vinifera]
GSVIVT01014682001	-2.34184	0.86051	K01728|1|0.0|819|vvi:100249765|pectate lyase [EC:4.2.2.2]	-	GO:0016837	-	gi|225461920|ref|XP_002265729.1|/0/PREDICTED: probable pectate lyase 15-like [Vitis vinifera]
GSVIVT01001828001	1.52946	0.808023	K00592|1|1e-13|77.0|aly:ARALYDRAFT_471564|[ribulose-bisphosphate carboxylase]-lysine N-methyltransferase [EC:2.1.1.127];K05302|3|1e-10|67.0|cre:CHLREDRAFT_169142|SET domain-containing protein 6	GO:0009536//plastid	-	-	gi|225452167|ref|XP_002264334.1|/0/PREDICTED: histone-lysine N-methyltransferase setd3 isoform 1 [Vitis vinifera]
GSVIVT01032408001	-2.09917	0.834862	K10268|1|3e-18|91.3|bdi:100843200|F-box and leucine-rich repeat protein 2/20	-	-	-	gi|296087612|emb|CBI34868.3|/0/unnamed protein product [Vitis vinifera]
GSVIVT01007348001	1.25462	0.802703	-	-	-	-	gi|225469840|ref|XP_002265335.1|/1.27955e-91/PREDICTED: uncharacterized protein LOC100258674 [Vitis vinifera]
GSVIVT01028129001	1.69578	0.835662	K13425|1|1e-25|115|vvi:100256849|WRKY transcription factor 22	-	GO:0003677//DNA binding;GO:0001071//nucleic acid binding transcription factor activity	GO:0010467//gene expression	gi|297743986|emb|CBI36956.3|/7.49461e-114/unnamed protein product [Vitis vinifera]
GSVIVT01025446001	-1.41436	0.816458	K13071|1|6e-75|280|osa:4331611|pheophorbide a oxygenase [EC:1.14.12.20]	GO:0009526//plastid envelope	GO:0016703;GO:0043169//cation binding;GO:0051536//iron-sulfur cluster binding	GO:0008152//metabolic process	gi|359478456|ref|XP_002283592.2|/0/PREDICTED: protochlorophyllide-dependent translocon component 52, chloroplastic-like [Vitis vinifera]
GSVIVT01035640001	3.08191	0.840917	K09873|1|3e-85|313|ath:AT2G25810|aquaporin TIP	GO:0000325//plant-type vacuole;GO:0031224//intrinsic to membrane	GO:0005372//water transmembrane transporter activity	GO:0006810//transport	gi|225429963|ref|XP_002283964.1|/2.52838e-161/PREDICTED: aquaporin TIP4-1-like [Vitis vinifera]
GSVIVT01023922001	2.04211	0.824913	K01183|1|1e-178|624|vvi:100232985|chitinase [EC:3.2.1.14]	-	GO:0004553//hydrolase activity, hydrolyzing O-glycosyl compounds;GO:0030247//polysaccharide binding	GO:0006950//response to stress;GO:0006026	gi|1705813|sp|P51613.1|CHIB_VITVI/1.4812e-177/RecName: Full=Basic endochitinase; Flags: Precursor
GSVIVT01031464001	2.49179	0.89016	K09873|1|8e-100|362|ath:AT4G01470|aquaporin TIP	GO:0031224//intrinsic to membrane	-	GO:0006810//transport	gi|225436454|ref|XP_002274538.1|/3.77788e-135/PREDICTED: aquaporin TIP1-1 isoform 1 [Vitis vinifera]
GSVIVT01023873001	3.77617	0.923227	-	GO:0031410//cytoplasmic vesicle	-	-	gi|297744474|emb|CBI37736.3|/1.81665e-84/unnamed protein product [Vitis vinifera]
GSVIVT01037887001	4.36372	0.813971	-	GO:0030312//external encapsulating structure	-	GO:0006950//response to stress	gi|225429327|ref|XP_002271730.1|/1.90161e-46/PREDICTED: snakin-1 [Vitis vinifera]
GSVIVT01029882001	2.24406	0.843296	-	-	-	-	gi|225439115|ref|XP_002266425.1|/4.92229e-135/PREDICTED: uncharacterized protein LOC100267210 [Vitis vinifera]
GSVIVT01017647001	1.56825	0.813992	K13862|1|5e-23|108|ota:Ot04g03190|solute carrier family 4 (sodium borate transporter), member 11	GO:0031224//intrinsic to membrane	GO:0015301//anion:anion antiporter activity;GO:0015103//inorganic anion transmembrane transporter activity	GO:0006820//anion transport;GO:0010035//response to inorganic substance	gi|297736777|emb|CBI25978.3|/0/unnamed protein product [Vitis vinifera]
GSVIVT01018648001	-2.75258	0.878849	K13783|1|0.0|864|vvi:100258691|MFS transporter, OPA family, solute carrier family 37 (glycerol-3-phosphate transporter), member 1/2	-	-	GO:0071702	gi|296084206|emb|CBI24594.3|/0/unnamed protein product [Vitis vinifera]
GSVIVT01008642001	2.23417	0.81901	K12311|1|0.0|1532|vvi:100244533|lysosomal alpha-mannosidase [EC:3.2.1.24]	-	GO:0046914//transition metal ion binding;GO:0015923//mannosidase activity	GO:0019318//hexose metabolic process	gi|225456481|ref|XP_002280858.1|/0/PREDICTED: lysosomal alpha-mannosidase [Vitis vinifera]
GSVIVT01026946001	-2.33677	0.869658	K08193|1|1e-126|452|cme:CMP354C|MFS transporter, ACS family, solute carrier family 17 (sodium-dependent inorganic phosphate cotransporter), other;K12303|4|9e-78|290|cre:CHLREDRAFT_78631|MFS transporter, ACS family, solute carrier family 17 (sodium-dependent inorganic phosphate cotransporter), member 9	GO:0009528//plastid inner membrane	GO:0015291//secondary active transmembrane transporter activity	GO:0006810//transport	gi|297745310|emb|CBI40390.3|/0/unnamed protein product [Vitis vinifera]
GSVIVT01021112001	-1.525	0.811592	K09510|1|8e-134|475|rcu:RCOM_1673240|DnaJ homolog subfamily B member 4	-	GO:0005515//protein binding	GO:0044267//cellular protein metabolic process	gi|297740428|emb|CBI30610.3|/1.22855e-154/unnamed protein product [Vitis vinifera]
GSVIVT01020078001	-2.16695	0.872816	K09338|1|3e-33|141|ath:AT3G01470|homeobox-leucine zipper protein	GO:0043231//intracellular membrane-bounded organelle	GO:0003677//DNA binding;GO:0001071//nucleic acid binding transcription factor activity	GO:0006351//transcription, DNA-dependent	gi|359473283|ref|XP_002269605.2|/1.33528e-178/PREDICTED: homeobox-leucine zipper protein HAT5-like [Vitis vinifera]
GSVIVT01031943001	1.62771	0.833369	-	-	-	-	gi|297741440|emb|CBI32571.3|/1.46606e-101/unnamed protein product [Vitis vinifera]
GSVIVT01037882001	2.26993	0.867409	-	-	-	-	gi|296083089|emb|CBI22493.3|/7.84536e-67/unnamed protein product [Vitis vinifera]
GSVIVT01024596001	3.38228	0.861505	K00430|1|5e-170|595|vvi:100257005|peroxidase [EC:1.11.1.7]	-	GO:0005506//iron ion binding;GO:0003824//catalytic activity;GO:0016209//antioxidant activity	GO:0008152//metabolic process;GO:0006950//response to stress	gi|223635590|sp|A7NY33.1|PER4_VITVI/6.16719e-169/RecName: Full=Peroxidase 4; Flags: Precursor
GSVIVT01036586001	3.86901	0.879779	-	GO:0043231//intracellular membrane-bounded organelle	-	-	gi|225464037|ref|XP_002267371.1|/0/PREDICTED: auxin-induced protein 5NG4 isoform 1 [Vitis vinifera]
GSVIVT01038540001	4.00515	0.82433	K13449|1|2e-70|263|vvi:100258414|pathogenesis-related protein 1	-	-	-	gi|225429250|ref|XP_002265050.1|/2.26586e-95/PREDICTED: basic form of pathogenesis-related protein 1 [Vitis vinifera]
GSVIVT01032837001	-1.32894	0.809083	K09588|1|0.0|827|vvi:100258692|cytochrome P450, family 90, subfamily A, polypeptide 1 [EC:1.14.-.-]	-	GO:0016491//oxidoreductase activity;GO:0005506//iron ion binding	GO:0009411//response to UV;GO:0010208//pollen wall assembly;GO:0016129;GO:0048878//chemical homeostasis;GO:0000902//cell morphogenesis;GO:0009908//flower development	gi|359486414|ref|XP_002270553.2|/0/PREDICTED: cytochrome P450 90A1-like [Vitis vinifera]
GSVIVT01001340001	1.88665	0.855796	-	GO:0016020//membrane;GO:0009536//plastid	GO:0035091//phosphatidylinositol binding;GO:0046914//transition metal ion binding;GO:0005515//protein binding	GO:0006952//defense response	gi|296088285|emb|CBI36511.3|/2.19917e-69/unnamed protein product [Vitis vinifera]
GSVIVT01019562001	-3.86394	0.929369	-	-	-	-	gi|297742358|emb|CBI34507.3|/1.15871e-106/unnamed protein product [Vitis vinifera]
GSVIVT01017714001	-5.24023	0.941933	K14432|1|1e-06|52.4|sbi:SORBI_03g040970|ABA responsive element binding factor	-	GO:0003677//DNA binding;GO:0001071//nucleic acid binding transcription factor activity;GO:0005515//protein binding	GO:0006351//transcription, DNA-dependent;GO:0009411//response to UV	gi|359477394|ref|XP_002275566.2|/7.80204e-80/PREDICTED: transcription factor HY5-like [Vitis vinifera]
GSVIVT01029926001	-2.34337	0.814922	K03327|1|0.0|927|vvi:100251800|multidrug resistance protein, MATE family	GO:0044464//cell part	GO:0015291//secondary active transmembrane transporter activity	GO:0015893//drug transport	gi|225439162|ref|XP_002267923.1|/0/PREDICTED: protein TRANSPARENT TESTA 12-like [Vitis vinifera]
GSVIVT01007635001	1.83203	0.829909	-	GO:0043234//protein complex	GO:0004721//phosphoprotein phosphatase activity;GO:0043169//cation binding	GO:0006464//cellular protein modification process	gi|297733692|emb|CBI14939.3|/2.08419e-166/unnamed protein product [Vitis vinifera]
GSVIVT01025777001	1.67559	0.834883	K07375|1|1e-19|94.0|osa:4341810|tubulin beta	-	-	-	gi|297741675|emb|CBI32807.3|/6.21683e-39/unnamed protein product [Vitis vinifera]
GSVIVT01001318001	3.04679	0.84042	-	GO:0044464//cell part	-	GO:0051234//establishment of localization	gi|297741192|emb|CBI31923.3|/0/unnamed protein product [Vitis vinifera]
GSVIVT01037780001	3.49591	0.851968	K15032|1|0.0|785|vvi:100260706|mTERF domain-containing protein, mitochondrial	GO:0043231//intracellular membrane-bounded organelle	-	-	gi|297737540|emb|CBI26741.3|/0/unnamed protein product [Vitis vinifera]
GSVIVT01021231001	-1.57228	0.838841	K00924|1|2e-103|374|osa:4342410|[EC:2.7.1.-];K07198|4|3e-39|160|bdi:100836644|5'-AMP-activated protein kinase, catalytic alpha subunit [EC:2.7.11.11]	-	GO:0004674//protein serine/threonine kinase activity;GO:0032559	GO:0006464//cellular protein modification process;GO:0023052//signaling	gi|297740516|emb|CBI30698.3|/0/unnamed protein product [Vitis vinifera]
GSVIVT01009309001	3.82913	0.880234	-	-	GO:0005102//receptor binding	-	gi|225458896|ref|XP_002285430.1|/1.12001e-30/PREDICTED: phytosulfokines 3 [Vitis vinifera]
GSVIVT01028812001	3.0103	0.855125	K13263|1|5e-52|203|gmx:100101902|isoflavone 7-O-glucosyltransferase [EC:2.4.1.170];K08237|3|5e-39|160|vvi:100246482|hydroquinone glucosyltransferase [EC:2.4.1.218]	-	GO:0035251//UDP-glucosyltransferase activity	-	gi|302143757|emb|CBI22618.3|/1.12336e-162/unnamed protein product [Vitis vinifera]
GSVIVT01021562001	2.98248	0.904736	K03021|1|5e-08|58.5|ota:Ot01g06000|DNA-directed RNA polymerase III subunit RPC2 [EC:2.7.7.6]	GO:0031410//cytoplasmic vesicle;GO:0031090//organelle membrane;GO:0009536//plastid	-	-	gi|225443962|ref|XP_002280109.1|/0/PREDICTED: uncharacterized membrane protein C24H6.13-like [Vitis vinifera]
GSVIVT01001657001	-3.0809	0.858153	-	-	-	-	gi|296088099|emb|CBI35488.3|/8.96475e-15/unnamed protein product [Vitis vinifera]
GSVIVT01002634001	1.89891	0.80106	-	-	-	-	gi|296084740|emb|CBI25884.3|/0/unnamed protein product [Vitis vinifera]
GSVIVT01024185001	3.04249	0.839317	-	-	-	-	gi|297744736|emb|CBI37998.3|/1.39016e-31/unnamed protein product [Vitis vinifera]
GSVIVT01007063001	-1.87785	0.827379	-	-	GO:0046914//transition metal ion binding	-	gi|296084718|emb|CBI25860.3|/0/unnamed protein product [Vitis vinifera]
GSVIVT01009059001	2.0672	0.842366	K13030|1|4e-68|256|sbi:SORBI_01g001220|cyanohydrin beta-glucosyltransferase [EC:2.4.1.85];K13228|2|3e-39|160|zma:100274317|UDP-glucosyltransferase BX9 [EC:2.4.1.202];K13493|3|1e-34|145|ath:AT5G05860|cytokinin-N-glucosyltransferase [EC:2.4.1.-];K13227|5|1e-33|142|zma:100277344|UDP-glucosyltransferase BX8 [EC:2.4.1.202]	-	-	-	gi|225459257|ref|XP_002285770.1|/0/PREDICTED: UDP-glycosyltransferase 85A2 [Vitis vinifera]
GSVIVT01026707001	1.5066	0.81224	K01114|1|6e-90|328|vvi:100253773|phospholipase C [EC:3.1.4.3]	GO:0016020//membrane	GO:0004629//phospholipase C activity	GO:0006644//phospholipid metabolic process	gi|359489132|ref|XP_003633883.1|/2.35071e-116/PREDICTED: phospholipase C 3-like isoform 2 [Vitis vinifera]
GSVIVT01031065001	-3.51041	0.846778	K14493|1|3e-38|157|ppp:PHYPADRAFT_118478|gibberellin receptor GID1 [EC:3.-.-.-]	-	-	-	gi|296087294|emb|CBI33668.3|/0/unnamed protein product [Vitis vinifera]
GSVIVT01001106001	2.1054	0.873097	K14638|1|6e-116|416|ppp:PHYPADRAFT_134814|solute carrier family 15 (peptide/histidine transporter), member 3/4	GO:0031224//intrinsic to membrane	-	GO:0015833//peptide transport	gi|296085541|emb|CBI29273.3|/0/unnamed protein product [Vitis vinifera]
